# Supplementary material for: Regio- and stereoselective azidation of activated N -allenamides: an entry to α, β, γ and δ-amido-azides
Source: Royal Society of Chemistry journal article supplement (doi:10.1039/d4qo01802h), 2024-11-04
Supplement: d4qo01802h1.pdf [file d4qo01802h1.pdf]

Supporting Information

# Regio- and Stereoselective Azidation of Activated *N*-allenamides: an entry to $\alpha$ , $\beta$ , $\gamma$ and $\delta$ -amido-azides

Dorian Schutz<sup>†a</sup>, Maxime Hourtoule<sup>†a</sup> and Laurence Miesch<sup>a\*</sup>

<sup>a</sup> *Equipe de Synthèse Organique et Phytochimie, Institut de Chimie,  
Université de Strasbourg, CNRS-UdS UMR 7177,  
4, rue Blaise Pascal CS 90032, 67081 Strasbourg, France*

Corresponding author: [lmiesch@unistra.fr](mailto:lmiesch@unistra.fr)

## Contents

|                                                                                                      |      |
|------------------------------------------------------------------------------------------------------|------|
| General remarks.....                                                                                 | S2   |
| Experimental procedure & characterization data .....                                                 | S2   |
| General procedure for the preparation of ynamides <b>S4</b> .....                                    | S2   |
| General procedure for the preparation of <i>N</i> -allenamides <b>1</b> .....                        | S3   |
| Trifluoromethylated <i>N</i> -allenamides <b>1a-q</b> .....                                          | S3   |
| Difluoromethylated <i>N</i> -allenamides <b>1r-t</b> .....                                           | S4   |
| Terminal <i>N</i> -allenamides <b>1u</b> <sup>3</sup> .....                                          | S4   |
| General procedure for the preparation of $\beta$ -amido azides <b>2</b> .....                        | S4   |
| Synthesis of trifluoromethylated $\beta$ -amido azides <b>2a-k</b> .....                             | S4   |
| Sequential one-pot synthesis of ester $\beta$ -amido azides <b>2l-n</b> .....                        | S5   |
| Synthesis of difluoromethylated $\beta$ -amido azides <b>2o-q</b> .....                              | S5   |
| General procedure for the preparation of $\alpha$ -amido azides <b>4</b> .....                       | S5   |
| General procedure for the preparation of difluoromethylated $\delta$ -amido azides <b>6</b> .....    | S6   |
| Extension and post-functionalization procedures.....                                                 | S6   |
| Large scale synthesis of trifluoromethylated amido azide <b>2a, 3a &amp; 4a</b> .....                | S6   |
| Hydration of trifluoromethylated $\gamma$ -amido azide <b>3a</b> .....                               | S7   |
| Hydrocyanation of trifluoromethylated <i>N</i> -allenamide <b>1c</b> .....                           | S7   |
| Cu(I)-catalyzed Alkyne Azide Cyclisation of trifluoromethylated $\beta$ -amido azide <b>2a</b> ..... | S8   |
| Azide reduction of ester vinyl azide <b>2l</b> .....                                                 | S8   |
| Characterization data .....                                                                          | S9   |
| NMR spectra.....                                                                                     | S35  |
| X-Ray Crystallography data .....                                                                     | S125 |
| Crystal Structure Report for <b>2c</b> (CCDC <b>2384608</b> ) .....                                  | S127 |
| Crystal Structure Report for <b>2l</b> (CCDC <b>2384809</b> ) .....                                  | S144 |
| Crystal Structure Report for <b>4a</b> (CCDC <b>2384604</b> ) .....                                  | S161 |

## General remarks

All reactions were carried out under an inert atmosphere of argon in dried glassware, unless otherwise noted. Conventional solvents (THF, CH<sub>2</sub>Cl<sub>2</sub>) are stored on molecular sieves and sampled under argon. Toluene, CH<sub>3</sub>CN, CHCl<sub>3</sub> were used as received.

NMR Spectra (<sup>1</sup>H, <sup>13</sup>C, <sup>19</sup>F) were performed at 298 K. <sup>1</sup>H (500 MHz or 300 MHz) and <sup>13</sup>C (126 MHz) NMR chemical shifts are reported relative to residual protiated solvent. <sup>19</sup>F (282 MHz or 471 MHz) NMR chemical shifts are reported without any calibration. Data are presented as follows: chemical shift (ppm), multiplicity (s = singlet, d = doublet, t = triplet, q = quartet, p = quintet, m = multiplet), coupling constant J (Hz) and integration.

HRMS data were recorded on a microTOF spectrometer equipped with an orthogonal electrospray (ESI) interface.

Thin layer chromatography was performed using Merck TLC silica gel 60 F254 aluminum sheets using petroleum ether/EtOAc as eluant and visualized using permanganate stain, ninhydrin stain, vanillin stain and/or UV light. Merck Geduran® 40-63 μm silica gel was used for column chromatography.

Infrared spectra were reported in frequency of absorption using Alpha Bruker Optics spectrometer.

Melting points were recorded with a SMP3 Stuart Scientific microscope in open capillary tubes and are uncorrected.

## Experimental procedure & characterization data

### General procedure for the preparation of ynamides **S4**<sup>1</sup>

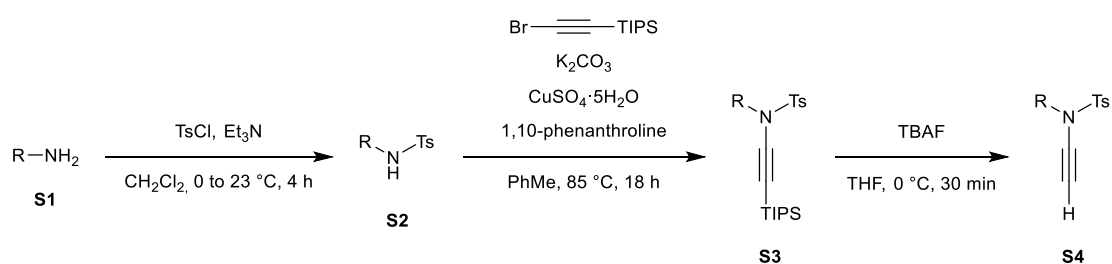

Primary amine **S1** (4.5 mmol, 1 equiv) was dissolved in CH<sub>2</sub>Cl<sub>2</sub> (0.3 M), TsCl (4.95 mmol, 1.1 equiv) and Et<sub>3</sub>N (11.25 mmol, 2.5 equiv) were added successively at 0 °C. After stirring at room temperature for 4 hours, the mixture was diluted with aqueous solution of HCl (1 N). The aqueous layer was extracted with CH<sub>2</sub>Cl<sub>2</sub> (3x) and Et<sub>2</sub>O (1x). The combined organic layers were washed with a saturated aqueous solution of NaCl, dried over MgSO<sub>4</sub>, concentrated under reduce pressure and purified by column chromatography on silica gel using a mixture of petroleum ether/EtOAc as eluent to afford the desired sulfonamide **S2**.

<sup>1</sup> Y. Zhang, R. P. Hsung, M. R. Tracey, K. C. M. Kurtz, E. L. Vera, *Org. Lett.* 2004, **6**, 1151–1154.

Sulfonamide **S2** (2 mmol, 1 equiv), CuSO<sub>4</sub>·5H<sub>2</sub>O (0.3 mmol, 15 mol%), 1,10-phenanthroline (0.6 mmol, 30 mol%), K<sub>2</sub>CO<sub>3</sub> (5 mmol, 2.5 equiv), the bromoacetylenic derivative (2.3 mmol, 1.15 equiv) were dissolved in PhMe (0.08 M) and the reaction mixture was heated to 85 °C with a heating block for 18 h. After cooling down to room temperature, the mixture was filtered on a pad of silica gel and washed with EtOAc. The filtrate was then concentrated under reduced pressure and the crude material was purified by column chromatography on silica gel using a mixture petroleum ether/EtOAc as eluent to afford the desired TIPS protected ynamide **S3**.

The (2-bromoethynyl)tris(propan-2-yl)silane was synthesized according to the literature.<sup>2</sup>

TIPS protected ynamide **S3** (2.8 mmol, 1 equiv) was dissolved in THF (0.1 M) and cooled at 0 °C. A TBAF solution (3.1 mmol, 1.1 equiv, 1 M) was added dropwise and the resulting mixture was stirred at 0 °C for 30 min. The mixture was allowed to warm up to room temperature and was hydrolyzed with H<sub>2</sub>O. The aqueous layer was extracted three times with EtOAc, washed with a saturated aqueous solution of NaCl, dried over MgSO<sub>4</sub>, filtered and concentrated under reduced pressure. The crude material was purified by column chromatography on silica gel using a mixture petroleum ether/EtOAc as eluent or just by washing with cold *n*-pentane to afford the desired ynamide **S4**.

## General procedure for the preparation of *N*-allenamides **1**

### Trifluoromethylated *N*-allenamides **1a-q**<sup>3</sup>

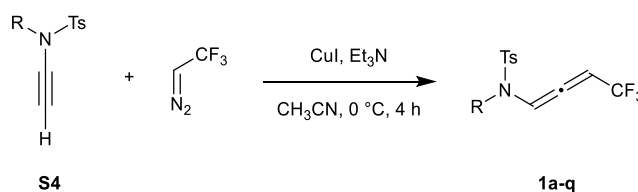

The corresponding ynamide **S4** (0.2 mmol, 1 equiv) was solubilized in CH<sub>3</sub>CN (0.1 M) in the presence of CuI (0.2 mmol, 20 mol%), and Et<sub>3</sub>N (0.4 mmol, 2 equiv). 1,1,1-trifluoro-diazoethane was added dropwise (in excess) at 0 °C and the reaction was stirred for 4 h. The mixture was concentrated under vacuum and the crude material was purified by column chromatography on silica gel using a mixture petroleum ether/EtOAc, as eluent to afford the desired trifluoromethylated *N*-allenamides **1a-q**.

1,1,1-trifluoro-diazoethane was synthesized according to the previous literature and stored in diethyl ether solution in the presence of MgSO<sub>4</sub> at -18 °C for a few weeks.<sup>4</sup>

<sup>2</sup> H. Hofmeister, K. Annen, H. Laurent, R. Wiechert, *Angew. Chem. Int. Ed. Engl.* 1984, **23**, 727–729.

<sup>3</sup> Y. Zheng, B. Moegle, S. Ghosh, A. Perfetto, D. Luise, I. Ciofini, L. Miesch, *Chem. – Eur. J.* 2022, **28**, e202103598.

<sup>4</sup> H. Gilman, R. G. Jones, *J. Am. Chem. Soc.* 1943, **65**, 1458–1460.

## Difluoromethylated *N*-allenamides **1r-t**

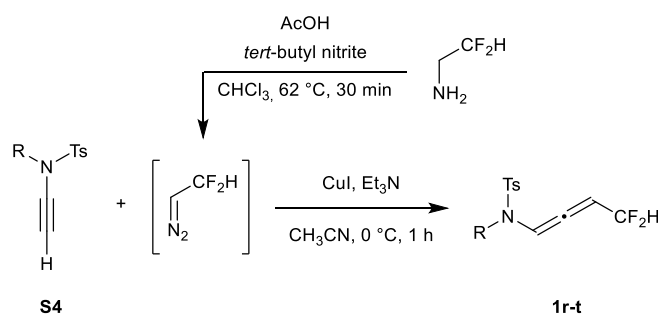

2,2-difluoroethan-1-amine (3.0 mmol, 6 equiv), *tert*-butyl nitrite (4.5 mmol, 9 equiv) and AcOH (0.25 mmol, 50 mol%) were dissolved in  $\text{CHCl}_3$  and heated to  $62\text{ }^\circ\text{C}$  with a heating block for 30 min. The reaction mixture was subsequently cooled down at room temperature with a water bath for 10 min. The reaction mixture was then slowly added at  $0\text{ }^\circ\text{C}$  to another round-bottom flask previously charged with ynamide **S4** (0.5 mmol, 1 equiv), CuI (0.15 mmol, 0.3 equiv) and  $\text{Et}_3\text{N}$  (1.25 mmol, 2.5 equiv) dissolved in  $\text{CH}_3\text{CN}$  (0.05 M). The resulting mixture was stirred for 1 h. The solvent was removed under vacuum and the crude material was purified by column chromatography on silica gel using a mixture petroleum ether/EtOAc, as eluent to afford the desired difluoromethylated *N*-allenamides **1r-t**.

## Terminal *N*-allenamides **1u**<sup>3</sup>

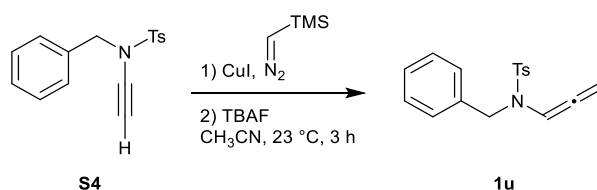

Benzyl-ynamide **S3** (0.5 mmol, 1 equiv) was dissolved in  $\text{CH}_3\text{CN}$  (0.1 M). CuI (0.1 mmol, 20 mol%) and trimethylsilyldiazomethane (0.54 mmol, 1.1 equiv, 2 M  $\text{Et}_2\text{O}$ ) was added dropwise and the reaction mixture was stirred at  $23\text{ }^\circ\text{C}$  for 3 hours. A TBAF solution (0.50 mmol, 1 equiv, 1 M in THF) was added dropwise at  $0\text{ }^\circ\text{C}$  and the resulting mixture was stirred during 30 min and then hydrolyzed with  $\text{H}_2\text{O}$ . The aqueous layer was extracted with  $\text{CH}_2\text{Cl}_2$  (x3) and with  $\text{Et}_2\text{O}$  (1x). The combined organic layers were washed with a saturated aqueous solution of NaCl, dried over  $\text{MgSO}_4$ , concentrated under reduced pressure and purified by column chromatography on silica gel using a mixture of petroleum ether/EtOAc as eluent to afford the desired terminal *N*-allenamide **1u** (0.34 mmol, 66 %) as a colorless oil.

## General procedure for the preparation of $\beta$ -amido azides **2**

### Synthesis of trifluoromethylated $\beta$ -amido azides **2a-k**

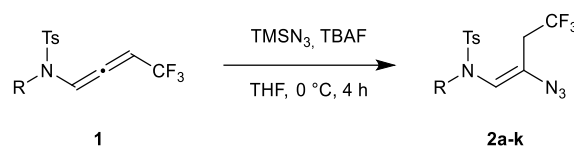

Trifluoromethylated *N*-allenamide **1** (0.1 mmol, 1 equiv) was dissolved in THF (0.1 M) and cooled to  $0\text{ }^\circ\text{C}$ .  $\text{TMSN}_3$  (2.0 mmol, 2 equiv) and a TBAF solution (0.2 mmol, 2 equiv, 1 M in THF) were subsequently added and the solution was stirred at  $0\text{ }^\circ\text{C}$  for 4 h. The solvent was removed under

vacuum and the crude material was purified by column chromatography on silica gel using a mixture petroleum ether/EtOAc, as eluent to afford the desired fluorinated  $\beta$ -amido azides **2a-k**.

### Sequential one-pot synthesis of ester $\beta$ -amido azides **2l-n**

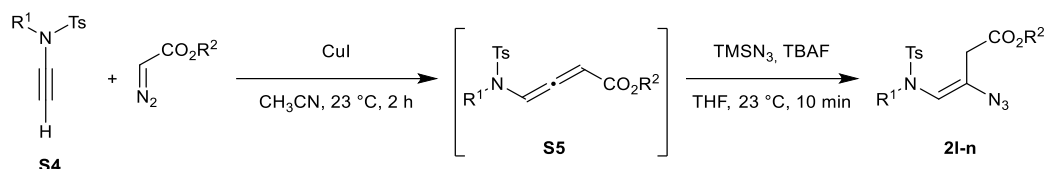

The corresponding ynamide **S4** (0.2 mmol, 1 equiv) was solubilized in CH<sub>3</sub>CN (0.1 M) in the presence of CuI (0.2 mmol, 1 equiv) and the diazo ester derivative (0.3 mmol, 1.5 equiv) was added dropwise at room temperature and the reaction was stirred for 2 h. TMSN<sub>3</sub> (0.22 mmol, 1.1 equiv) and a TBAF solution (0.22 mmol, 1.1 equiv, 1 M in THF) were then subsequently added to the reaction mixture at room temperature and stirred for 10 min. The solvent was removed under vacuum and the crude material was purified by column chromatography on silica gel using a mixture petroleum ether/EtOAc, as eluent to afford the desired ester  $\beta$ -amido azides **2l-n**.

The corresponding diazo ester derivatives were synthesized according to the literature.<sup>5</sup>

### Synthesis of difluoromethylated $\beta$ -amido azides **2o-q**

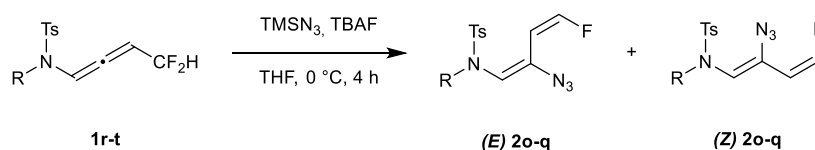

Difluoromethylated *N*-allenamide **1r-t** (0.1 mmol, 1 equiv) was dissolved in THF (0.1 M) and cooled to 0 °C. TMSN<sub>3</sub> (2.0 mmol, 2 equiv) and a TBAF solution (0.2 mmol, 2 equiv, 1 M in THF) were subsequently added and the solution was stirred at 0 °C for 4 h. The solvent was removed under vacuum and the crude material was purified by column chromatography on silica gel using a mixture petroleum ether/EtOAc, as eluent to afford the desired mono-fluorinated  $\beta$ -amido azides **2o-q** as a diastereomeric mixture.

### General procedure for the preparation of $\alpha$ -amido azides **4**

*Caution! Handle with care. This protocol generates hydrazoic acid (HN<sub>3</sub>), which is acutely toxic and extremely shock sensitive.*

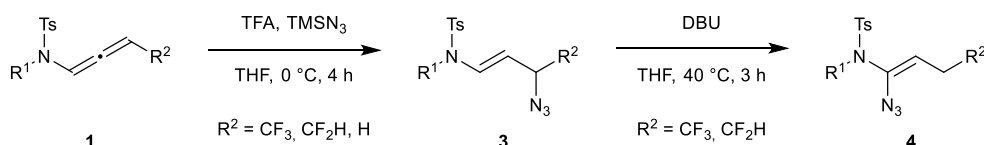

*N*-allenamide **1** (0.1 mmol, 1 equiv) was dissolved in THF (0.1 M) and cooled to 0 °C. TFA (0.02 mmol, 0.2 equiv) and TMSN<sub>3</sub> (0.2 mmol, 2 equiv) were subsequently added and the solution was stirred at 0 °C for 4 h. The reaction mixture was hydrolyzed with a saturated aqueous solution of

<sup>5</sup> T. Toma, J. Shimokawa, T. Fukuyama, *Org. Lett.* 2007, **9**, 3195–3197.

NaHCO<sub>3</sub>. The aqueous layer was extracted with EtOAc (3x). The combined organic layers were washed with a saturated aqueous solution of NaCl, dried over MgSO<sub>4</sub>, concentrated under reduced pressure and purified by column chromatography on silica gel using a mixture of petroleum ether/EtOAc as eluent to afford the desired  $\gamma$ -amido azides **3a-j**.

Allyl azide **3a-j** (0.1 mmol, 1 equiv) was dissolved in THF (0.05 M) in the presence of DBU (0.15 mmol, 1.2 equiv). The reaction mixture was stirred at 40 °C for 3 h. The reaction was cooled down to room temperature and hydrolyzed with H<sub>2</sub>O. The aqueous layer was extracted with EtOAc (3x). The combined organic layers were washed with a saturated aqueous solution of NaCl, dried over MgSO<sub>4</sub>, concentrated under reduced pressure and purified by column chromatography on silica gel using a mixture of petroleum ether/EtOAc as eluent to afford the desired  $\alpha$ -amido azides **4a-i**.

## General procedure for the preparation of difluoromethylated $\delta$ -amido azides **6**

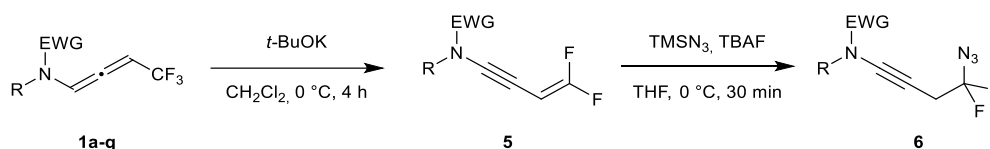

Trifluoromethylated *N*-allenamide **1a-q** (0.2 mmol, 1 equiv) was dissolved in CH<sub>2</sub>Cl<sub>2</sub> (0.05 M) and cooled to 0 °C. *t*-BuOK (0.4 mmol, 2 equiv) was then added portion by portion and the resulting reaction mixture was stirred for 4 h at 0 °C before being hydrolyzed with H<sub>2</sub>O. The aqueous layer was extracted three times with CH<sub>2</sub>Cl<sub>2</sub>. The combined organic layers were washed with a saturated aqueous solution of NaCl, dried over MgSO<sub>4</sub>, concentrated under reduced pressure and purified by column chromatography on silica gel using a mixture of petroleum ether/EtOAc as eluent to afford the desired ene-ynamide **5a-c**.<sup>6</sup>

To a stirring solution of TMSN<sub>3</sub> (0.4 mmol, 2 equiv) and TBAF (0.22 mmol, 1.1 equiv, 1 M in THF) in THF (2 mL) at 0 °C was added dropwise a solution of ene-ynamide **5a-c** (0.2 mmol, 1 equiv) in THF (2 mL). After stirring for 30 min, the solvent was removed under vacuum and the crude material was purified by column chromatography on silica gel using a mixture petroleum ether/EtOAc, as eluent to afford the desired difluoromethylated  $\delta$ -amido azides **6a-c**.

## Extension and post-functionalization procedures

### Large scale synthesis of trifluoromethylated amido azide **2a**, **3a** & **4a**

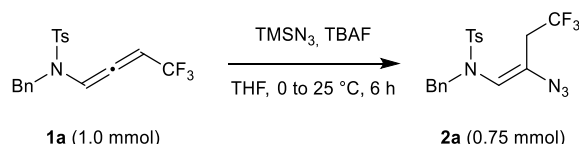

Trifluoromethylated *N*-allenamide **1a** (1 mmol, 1 equiv) was dissolved in THF (0.1 M) and cooled to 0 °C. TMSN<sub>3</sub> (2.0 mmol, 2 equiv) and a TBAF solution (2.0 mmol, 2 equiv, 1 M in THF) were subsequently added and the solution was stirred at 0 °C for 6 h. The solvent was removed under vacuum and the crude material was purified by column chromatography on silica gel using a

<sup>6</sup> M. Hourtoule, L. Miesch, *Org. Lett.* 2022, **24**, 3896–3900.

mixture petroleum ether/EtOAc, as eluent to afford the desired fluorinated  $\beta$ -amido azides **2a** (0.75 mmol, 75 %) as a white solid.

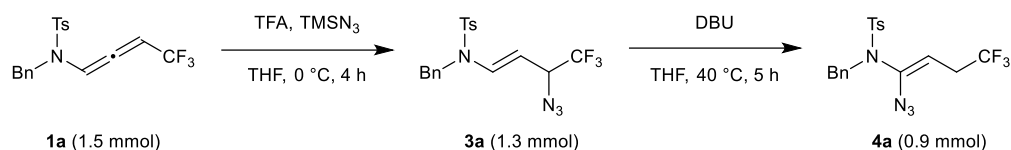

*N*-allenamide **1a** (1.5 mmol, 1 equiv) was dissolved in THF (0.1 M) and cooled to 0 °C. TFA (0.3 mmol, 0.3 equiv) and TMSN<sub>3</sub> (3.0 mmol, 3 equiv) were subsequently added and the solution was stirred at 0 °C for 4 h. The reaction mixture was hydrolyzed with a saturated aqueous solution of NaHCO<sub>3</sub>. The aqueous layer was extracted with EtOAc (3x). The combined organic layers were washed with a saturated aqueous solution of NaCl, dried over MgSO<sub>4</sub>, concentrated under reduced pressure and purified by column chromatography on silica gel using a mixture of petroleum ether/EtOAc as eluent to afford the desired  $\gamma$ -amido azides **3a** (1.3 mmol, 88 %) as a white solid.

Allyl azide **3a** (1.3 mmol, 1 equiv) was dissolved in THF (0.05 M) in the presence of DBU (1.9 mmol, 1.5 equiv). The reaction mixture was stirred at 40 °C for 5 h. The reaction was cooled down to room temperature and hydrolyzed with H<sub>2</sub>O. The aqueous layer was extracted with EtOAc (3x). The combined organic layers were washed with a saturated aqueous solution of NaCl, dried over MgSO<sub>4</sub>, concentrated under reduced pressure and purified by column chromatography on silica gel using a mixture of petroleum ether/EtOAc as eluent to afford the desired  $\alpha$ -amido azides **4a** (0.9 mmol, 67 %) as a white solid.

### Hydration of trifluoromethylated $\gamma$ -amido azide **3a**

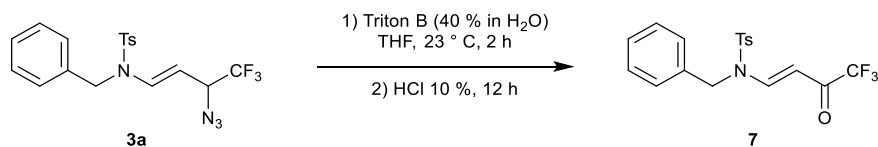

Allyl azide **3a** (0.1 mmol, 1 equiv) was dissolved in THF (0.1 M) and Triton B (0.15 mmol, 1.5 equiv) was added dropwise at 0 °C and the resulting mixture was stirred for 2 h at room temperature. The reaction was then hydrolyzed with an aqueous solution of HCl (10 %) and stirred for another 12 h. The aqueous layer was then extracted with EtOAc (3x), the combined organic layers were washed with a saturated aqueous solution of NaCl, dried over MgSO<sub>4</sub>, concentrated under reduced pressure and purified by column chromatography on silica gel using a mixture of petroleum ether/EtOAc as eluent to afford the trifluoromethyl ketone **7** (0.09 mmol, 35 mg, 91 %) as a colorless oil.

### Hydrocyanation of trifluoromethylated *N*-allenamide **1c**

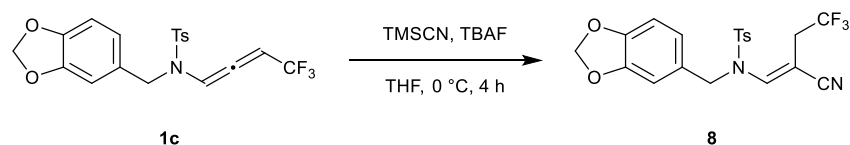

Trifluoromethylated *N*-allenamide **1c** (0.1 mmol, 1 equiv) was dissolved in THF (0.1 M) and cooled to 0 °C. TMSCN (2.0 mmol, 2 equiv) and a TBAF solution (0.2 mmol, 2 equiv, 1 M in THF) were

subsequently added and the solution was stirred at 0 °C for 4 h. The solvent was removed under vacuum and the crude material was purified by column chromatography on silica gel using a mixture petroleum ether/EtOAc, as eluent to afford the desired fluorinated vinyl nitrile **8** (0.07 mmol, 29.5 mg, 69 %) as a colorless oil.

### Cu(I)-catalyzed Alkyne Azide Cyclisation of trifluoromethylated $\beta$ -amido azide **2a**<sup>7</sup>

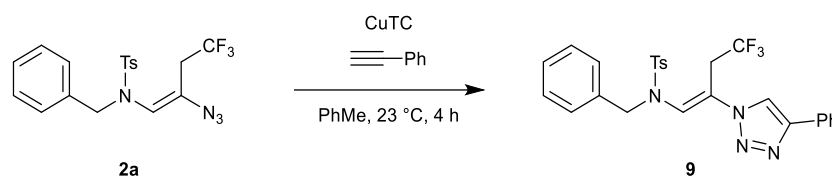

To a solution of phenyl acetylene (0.22 mmol, 1.1 equiv) and CuTC (0.06 mmol, 30 mol%) in PhMe (0.1 M) was added vinyl azide **2a** (0.2 mmol, 1 equiv) and the resulting mixture was stirred at room temperature for 4 h. The aqueous layer was then extracted with EtOAc (3x), the combined organic layers were washed with a saturated aqueous solution of NaCl, dried over MgSO<sub>4</sub>, concentrated under reduced pressure and purified by column chromatography on silica gel using a mixture of petroleum ether/EtOAc as eluent to afford the triazole **9** (0.2 mmol, 98 %) as a white solid.

### Azide reduction of ester vinyl azide **2l**

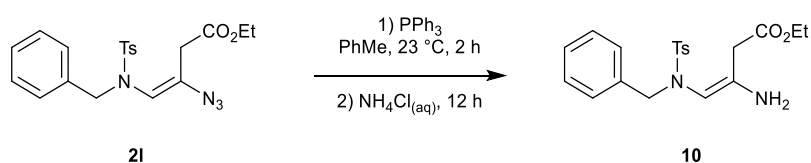

Ester vinyl azide **2l** (0.1 mmol, 1 equiv) and PPh<sub>3</sub> (0.2 mmol, 2 equiv) were dissolved in PhMe (0.05 M) and stirred at room temperature for 2 h. The reaction was hydrolyzed with a saturated solution of NH<sub>4</sub>Cl and stirred for an additional 12 h. The aqueous layer was then extracted with EtOAc (3x), the combined organic layers were washed with a saturated aqueous solution of NaCl, dried over MgSO<sub>4</sub>, concentrated under reduced pressure and purified by column chromatography on silica gel using a mixture of petroleum ether/EtOAc as eluent to afford the desired primary enamine **10** (0.09 mmol, 87 %) as a colorless oil.

<sup>7</sup> Z. Liu, P. Liao, X. Bi, *Org. Lett.* 2014, **16**, 3668–3671.



## Characterization data

### Compound **1a** *N*-benzyl-4-methyl-*N*-(4,4,4-trifluorobuta-1,2-dien-1-yl)benzenesulfonamide

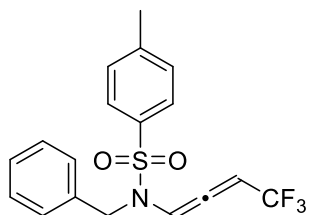

$C_{18}H_{16}F_3NO_2S$   
MW: 367.39 g.mol<sup>-1</sup>  
White solid  
87%

**<sup>1</sup>H NMR (300 MHz, CDCl<sub>3</sub>):**  $\delta$  = 7.79 – 7.67 (m, 2H), 7.45 – 7.38 (m, 1H), 7.38 – 7.32 (m, 2H), 7.30 – 7.18 (m, 5H), 5.68 (p, *J* = 5.6 Hz, 1H), 4.46 (d, *J* = 15.3 Hz, 1H), 4.12 (d, *J* = 15.3 Hz, 1H), 2.46 (s, 3H) ppm.

Data match with those described in the literature<sup>6</sup>

### Compound **1b** 4-methyl-*N*-phenethyl-*N*-(4,4,4-trifluorobuta-1,2-dien-1-yl)benzenesulfonamide

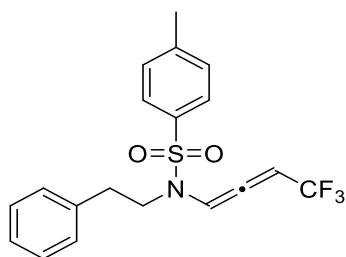

$C_{19}H_{18}F_3NO_2S$   
MW: 381.41 g.mol<sup>-1</sup>  
White solid  
65%

**<sup>1</sup>H NMR (500 MHz, CDCl<sub>3</sub>):**  $\delta$  = 7.74 – 7.63 (m, 2H), 7.46 (dq, *J* = 6.2, 3.1 Hz, 1H), 7.32 (d, *J* = 8.1 Hz, 2H), 7.31 – 7.27 (m, 2H), 7.24 – 7.18 (m, 1H), 7.17 – 7.09 (m, 2H), 5.99 (p, *J* = 5.6 Hz, 1H), 3.37 – 3.23 (m, 2H), 2.90 – 2.77 (m, 2H), 2.43 (s, 3H) ppm.

Data match with those described in the literature<sup>6</sup>

### Compound **1c** *N*-(benzo[d][1,3]dioxol-5-ylmethyl)-4-methyl-*N*-(4,4,4-trifluorobuta-1,2-dien-1-yl)benzenesulfonamide

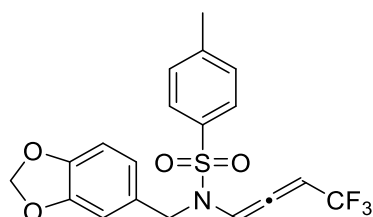

$C_{19}H_{16}F_3NO_4S$   
MW: 411.40 g.mol<sup>-1</sup>  
White solid  
75%

**<sup>1</sup>H NMR (400 MHz, CDCl<sub>3</sub>):**  $\delta$  = 7.71 (d, *J* = 8.1 Hz, 2H), 7.41 – 7.37 (m, 1H), 7.35 (d, *J* = 8.1 Hz, 2H), 6.77 (d, *J* = 1.7 Hz, 1H), 6.73 – 6.62 (m, 2H), 5.93 (s, 2H), 5.75 (p, *J* = 5.6 Hz, 1H), 4.34 (d, *J* = 15.0 Hz, 1H), 4.06 (d, *J* = 15.0 Hz, 1H), 2.45 (s, 3H) ppm.

Data match with those described in the literature<sup>6</sup>

Compound **1d** *N*-(but-3-en-1-yl)-4-methyl-*N*-(4,4,4-trifluorobuta-1,2-dien-1-yl)benzenesulfonamide

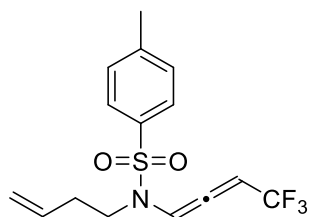

$C_{15}H_{16}F_3NO_2S$   
MW: 331.35 g.mol<sup>-1</sup>  
Colorless oil  
95%

**<sup>1</sup>H NMR (500 MHz, CDCl<sub>3</sub>):**  $\delta$  = 7.52 (d, *J* = 8.1 Hz, 2H), 7.31 – 7.29 (m, 1H), 6.70 (d, *J* = 8.0 Hz, 2H), 5.57 – 5.48 (m, 1H), 5.35 (p, *J* = 5.6 Hz, 1H), 5.00 – 4.85 (m, 2H), 3.07 – 2.95 (m, 2H), 2.24 – 2.07 (m, 2H), 1.82 (s, 3H) ppm.

Data match with those described in the literature<sup>6</sup>

Compound **1e** 4-methyl-*N*-(pent-4-en-1-yl)-*N*-(4,4,4-trifluorobuta-1,2-dien-1-yl)benzenesulfonamide

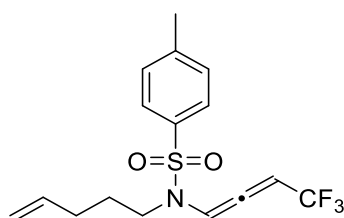

$C_{16}H_{18}F_3NO_2S$   
MW: 345.38 g.mol<sup>-1</sup>  
Colorless oil  
90%

**<sup>1</sup>H NMR (500 MHz, CDCl<sub>3</sub>):**  $\delta$  = 7.55 (d, *J* = 8.3 Hz, 2H), 7.33 – 7.30 (m, 1H), 6.73 (d, *J* = 8.0 Hz, 2H), 5.65 – 5.57 (m, 1H), 5.36 (p, *J* = 5.6 Hz, 1H), 4.97 – 4.89 (m, 2H), 3.02 – 2.87 (m, 2H), 1.96 – 1.76 (m, 5H), 1.58 – 1.39 (m, 2H) ppm.

Data match with those described in the literature<sup>6</sup>

Compound **1f** 4-methyl-*N*-(4,4,4-trifluorobuta-1,2-dien-1-yl)-*N*-(2,2,2-trifluoroethyl)benzenesulfonamide

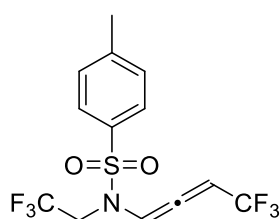

$C_{13}H_{11}F_6NO_2S$   
MW: 359.29 g.mol<sup>-1</sup>  
Colorless oil  
71%

**<sup>1</sup>H NMR (500 MHz, CDCl<sub>3</sub>):**  $\delta$  = 7.74 (d, *J* = 8.4 Hz, 2H), 7.53 – 7.33 (m, 3H), 6.07 (p, *J* = 5.5 Hz, 1H), 3.90 (dq, *J* = 15.6, 8.1, 0.8 Hz, 1H), 3.72 (dq, *J* = 16.1, 8.1 Hz, 1H), 2.49 (s, 3H) ppm.

Data match with those described in the literature<sup>8</sup>

<sup>8</sup> M. Hourtoule, L. Miesch, *Org. Lett.* 2023, **25**, 1727–1731.

Compound 1g *N*-(2-((3*a*R,7*a*S)-1,3-dioxo-1,3,3*a*,4,7,7*a*-hexahydro-2*H*-isoindol-2-yl)ethyl)-4-methyl-*N*-(4,4,4-trifluorobuta-1,2-dien-1-yl)benzenesulfonamide

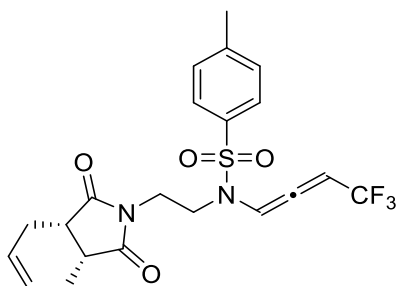

C<sub>21</sub>H<sub>21</sub>F<sub>3</sub>N<sub>2</sub>O<sub>4</sub>S  
MW: 454.46 g.mol<sup>-1</sup>  
White solid  
91%

**<sup>1</sup>H NMR (500 MHz, CDCl<sub>3</sub>):** δ = 7.63 (d, *J* = 8.1 Hz, 2H), 7.41 – 7.34 (m, 1H), 7.32 (d, *J* = 7.9 Hz, 2H), 6.08 (p, *J* = 5.5 Hz, 1H), 5.90 (m, 2H), 3.65 – 3.54 (m, 2H), 3.42 – 3.33 (m, 1H), 3.21 – 3.14 (m, 2H), 3.10 (dt, *J* = 14.8, 5.1 Hz, 1H), 2.62 – 2.54 (m, 2H), 2.43 (s, 3H), 2.26 – 2.25 (m, 2H) ppm.

**<sup>13</sup>C NMR (126 MHz, CDCl<sub>3</sub>):** δ = 198.1 (q, *J* = 5.8 Hz), 180.3, 180.3, 144.8, 134.7, 130.2, 128.0, 128.0, 127.2, 121.3 (q, *J* = 271.9 Hz), 106.9, 97.3 (q, *J* = 39.2 Hz), 44.0, 39.3, 39.3, 35.3, 23.4, 23.4, 21.7 ppm.

**<sup>19</sup>F NMR (471 MHz, CDCl<sub>3</sub>):** δ = -62.08 ppm.

**HRMS (ESI-TOF) *m/z*:** [M+Na]<sup>+</sup> calcd for C<sub>21</sub>H<sub>21</sub>F<sub>3</sub>N<sub>2</sub>NaO<sub>4</sub>S 477.1066; Found 477.1056.

**IR (neat):** ν = 3046, 1703, 1402, 1360, 1166, 1127 cm<sup>-1</sup>

Compound 1h 4-methyl-*N*-(2-(2-oxocyclohexyl)ethyl)-*N*-(4,4,4-trifluorobuta-1,2-dien-1-yl)benzenesulfonamide

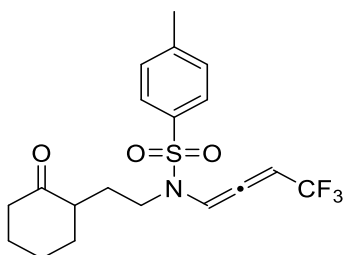

C<sub>19</sub>H<sub>22</sub>F<sub>3</sub>NO<sub>3</sub>S  
MW: 401.44 g.mol<sup>-1</sup>  
White solid  
62%

Only one diastereoisomer was described for <sup>13</sup>C-NMR.

**<sup>1</sup>H NMR (500 MHz, CDCl<sub>3</sub>):** δ = 7.68 – 7.62 (m, 2H), 7.42 – 7.34 (m, 1H), 7.31 (d, *J* = 8.1 Hz, 2H), 6.02 – 5.90 (m, 1H), 3.30 – 3.01 (m, 2H), 2.42 (s, 4H), 2.40 – 2.29 (m, 2H), 2.13 – 1.98 (m, 2H), 1.98 – 1.81 (m, 2H), 1.78 – 1.56 (m, 2H), 1.41 – 1.27 (m, 2H) ppm.

**<sup>13</sup>C NMR (126 MHz, CDCl<sub>3</sub>):** δ = 212.8, 198.4 (q, *J* = 5.8 Hz), 144.5, 134.9, 130.1, 127.2, 121.4 (q, *J* = 272.0 Hz), 107.0, 96.3 (q, *J* = 39.2 Hz), 47.4, 45.5, 42.3, 34.8, 28.3, 27.0, 25.4, 21.7 ppm.

**<sup>19</sup>F NMR (471 MHz, CDCl<sub>3</sub>):** δ = -62.10, -62.31 ppm.

**HRMS (ESI-TOF) *m/z*:** [M+Na]<sup>+</sup> calcd for C<sub>19</sub>H<sub>22</sub>F<sub>3</sub>NNaO<sub>3</sub>S 424.1165; Found 424.1159.

**IR (neat):** ν = 3046, 2934, 1708, 1356, 1265, 1121 cm<sup>-1</sup>

Compound 1i N-phenethyl-N-(4,4,4-trifluorobuta-1,2-dien-1-yl)methanesulfonamide

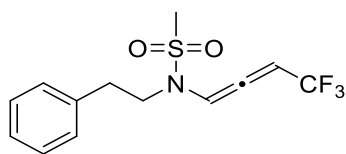

$C_{13}H_{14}F_3NO_2S$   
MW: 305.32 g.mol<sup>-1</sup>  
White solid  
59%

**<sup>1</sup>H NMR (500 MHz, CDCl<sub>3</sub>):** δ = 7.14 – 7.02 (m, 2H), 7.06 – 6.96 (m, 3H), 6.94 (dt, *J* = 6.3, 3.2 Hz, 1H), 5.46 (p, *J* = 5.6 Hz, 1H), 3.26 – 3.03 (m, 2H), 2.64 (dd, *J* = 8.6, 7.1 Hz, 2H), 1.86 (s, 3H) ppm.

Data match with those described in the literature<sup>9</sup>

Compound 1j 2-(4,4,4-trifluorobuta-1,2-dien-1-yl)-2,3-dihydrobenzo[d]isothiazole 1,1-dioxide

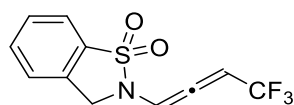

$C_{11}H_8F_3NO_2S$   
MW: 275.24 g.mol<sup>-1</sup>  
White solid  
58%

**<sup>1</sup>H NMR (500 MHz, CDCl<sub>3</sub>):** δ = 7.85 (ddd, *J* = 7.7, 1.3, 0.6 Hz, 1H), 7.69 (td, *J* = 7.7, 1.3 Hz, 1H), 7.63 – 7.55 (m, 1H), 7.47 (dt, *J* = 7.8, 0.9 Hz, 1H), 7.32 (dq, *J* = 5.9, 2.9 Hz, 1H), 6.17 (p, *J* = 5.9 Hz, 1H), 4.46 (d, *J* = 4.8 Hz, 2H) ppm.

Data match with those described in the literature<sup>6</sup>

Compound 1k 3-(4,4,4-trifluorobuta-1,2-dien-1-yl)oxazolidin-2-one

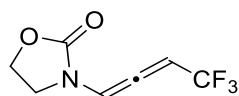

$C_7H_6F_3NO_2$   
MW: 193.13 g.mol<sup>-1</sup>  
Colorless oil  
73%

**<sup>1</sup>H NMR (500 MHz, CDCl<sub>3</sub>):** δ = 6.85 (dq, *J* = 6.2, 3.1 Hz, 1H), 5.36 (p, *J* = 5.6 Hz, 1H), 3.05 (pd, *J* = 8.9, 6.5 Hz, 2H), 2.07 (dtd, *J* = 22.0, 8.9, 6.5 Hz, 2H) ppm.

Data match with those described in the literature<sup>3</sup>

Compound 1l N-(4-fluorobenzyl)-4-methyl-N-(4,4,4-trifluorobuta-1,2-dien-1-yl)benzenesulfonamide

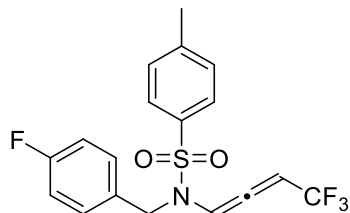

$C_{18}H_{15}F_4NO_2S$   
MW: 385.38 g.mol<sup>-1</sup>  
White solid  
78%

**<sup>1</sup>H NMR (300 MHz, CDCl<sub>3</sub>):** δ = 7.71 (d, *J* = 8.4 Hz, 2H), 7.43 – 7.38 (m, 1H), 7.36 (d, *J* = 8.1 Hz, 2H), 7.22 (dd, *J* = 8.6, 5.4 Hz, 2H), 6.97 (t, *J* = 8.7 Hz, 2H), 5.71 (p, *J* = 5.6 Hz, 1H), 4.38 (d, *J* = 15.3 Hz, 1H), 4.14 (d, *J* = 15.2 Hz, 1H), 2.46 (s, 3H) ppm.

<sup>9</sup> C. Gommenginger, Y. Zheng, D. Maccarone, I. Ciofini, L. Miesch, *Org. Chem. Front.* 2023, **10**, 4055–4060.

Data match with those described in the literature<sup>10</sup>

Compound **1m** *N,N'*-(butane-1,4-diyl)bis(4-methyl-*N*-(4,4,4-trifluorobuta-1,2-dien-1-yl)benzenesulfonamide)

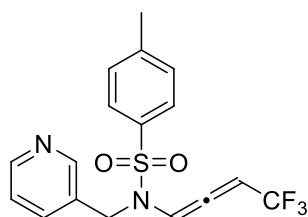

$C_{17}H_{15}F_3N_2O_2S$   
MW: 368.37 g.mol<sup>-1</sup>  
Orange oil  
52%

**<sup>1</sup>H NMR (300 MHz, CDCl<sub>3</sub>):**  $\delta$  = 8.43 (s, 2H), 7.49 (d, *J* = 8.3 Hz, 2H), 7.42 (d, *J* = 7.8 Hz, 1H), 7.19 – 7.17 (m, 1H), 6.72 (d, *J* = 8.1 Hz, 2H), 6.70 – 6.63 (m, 1H), 5.12 (s, 1H), 3.98 (d, *J* = 15.5 Hz, 1H), 3.74 (d, *J* = 15.4 Hz, 1H), 1.84 (s, 3H) ppm.

Data match with those described in the literature<sup>10</sup>

Compound **1n** *N*,4-dimethyl-*N*-(4,4,4-trifluorobuta-1,2-dien-1-yl)benzenesulfonamide

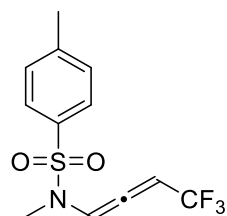

$C_{12}H_{12}F_3NO_2S$   
MW: 291.29 g.mol<sup>-1</sup>

**1n** was used without any further purification.

Compound **1o** *N*-cyclopropyl-4-methyl-*N*-(4,4,4-trifluorobuta-1,2-dien-1-yl)benzenesulfonamide

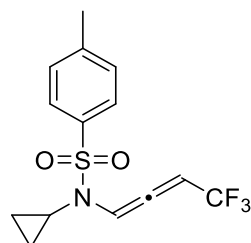

$C_{14}H_{14}F_3NO_2S$   
MW: 317.33 g.mol<sup>-1</sup>  
White solid  
74%

**<sup>1</sup>H NMR (300 MHz, CDCl<sub>3</sub>):**  $\delta$  = 7.79 – 7.71 (m, 2H), 7.39 – 7.33 (m, 2H), 7.33 – 7.30 (m, 1H), 5.88 (p, *J* = 5.6 Hz, 1H), 2.45 (s, 3H), 1.73 (tt, *J* = 6.9, 3.6 Hz, 1H), 1.12 – 0.88 (m, 2H), 0.83 – 0.64 (m, 2H) ppm.

Data match with those described in the literature<sup>6</sup>

<sup>10</sup> C. Gommenginger, M. Hourtoule, M. Menghini, L. Miesch, *Org. Biomol. Chem.* 2024, **22**, 940–944.

Compound **1p** *N*-(4-cyanobutyl)-4-methyl-*N*-(4,4,4-trifluorobuta-1,2-dien-1-yl)benzenesulfonamide

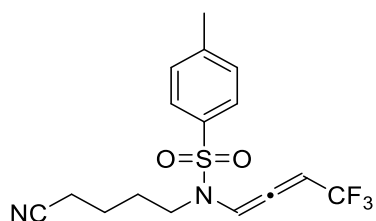

$C_{16}H_{17}F_3N_2O_2S$   
MW: 358.38 g.mol<sup>-1</sup>  
Colorless oil  
64%

**<sup>1</sup>H NMR (300 MHz, CDCl<sub>3</sub>):**  $\delta$  = 7.68 (d,  $J$  = 8.4 Hz, 2H), 7.47 – 7.38 (m, 1H), 7.35 (d,  $J$  = 8.4 Hz, 2H), 5.99 (p,  $J$  = 5.5 Hz, 1H), 3.14 (t,  $J$  = 6.6 Hz, 2H), 2.45 (s, 3H), 2.39 (tt,  $J$  = 6.6, 1.4 Hz, 2H), 1.74 – 1.65 (m, 4H) ppm.

Data match with those described in the literature<sup>6</sup>

Compound **1q** *N*-benzyl-*N*-(4,4,4-trifluorobuta-1,2-dien-1-yl)methanesulfonamide

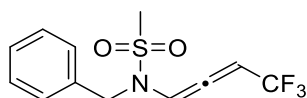

$C_{12}H_{12}F_3NO_2S$   
MW: 291.29 g.mol<sup>-1</sup>  
White solid  
81%

**<sup>1</sup>H NMR (500 MHz, CDCl<sub>3</sub>):**  $\delta$  = 7.56 – 7.13 (m, 6H), 5.85 (p,  $J$  = 5.6 Hz, 1H), 4.66 (d,  $J$  = 15.3 Hz, 1H), 4.41 (d,  $J$  = 15.3 Hz, 1H), 2.93 (s, 3H) ppm.

Data match with those described in the literature<sup>6</sup>

Compound **1r** *N*-benzyl-*N*-(4,4-difluorobuta-1,2-dien-1-yl)-4-methylbenzenesulfonamide

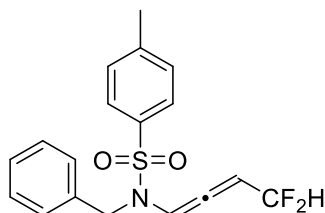

$C_{18}H_{17}F_2NO_2S$   
MW: 349.40 g.mol<sup>-1</sup>  
Colorless oil  
82%

**<sup>1</sup>H NMR (300 MHz, CDCl<sub>3</sub>):**  $\delta$  = 7.76 (d,  $J$  = 8.3 Hz, 2H), 7.39 (d,  $J$  = 8.0 Hz, 2H), 7.35 – 7.26 (m, 5H), 7.23 (dd,  $J$  = 11.0, 5.7 Hz, 1H), 5.68 (p,  $J$  = 6.0 Hz, 1H), 5.39 (td,  $J$  = 56.0, 6.0 Hz, 1H), 4.48 (d,  $J$  = 15.1 Hz, 1H), 4.18 (d,  $J$  = 15.1 Hz, 1H), 2.49 (s, 3H) ppm.

Data match with those described in the literature<sup>3</sup>

Compound **1s** *N*-cyclopropyl-*N*-(4,4-difluorobuta-1,2-dien-1-yl)-4-methylbenzenesulfonamide

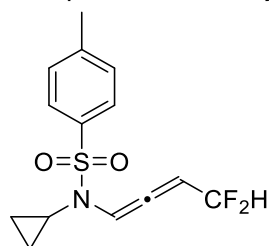

$C_{14}H_{15}F_2NO_2S$   
MW: 299.34 g.mol<sup>-1</sup>  
White solid  
89%

**<sup>1</sup>H NMR (500 MHz, CDCl<sub>3</sub>):**  $\delta$  = 7.74 (d,  $J$  = 8.4 Hz, 2H), 7.35 (d,  $J$  = 8.6 Hz, 2H), 7.17 (td,  $J$  = 5.8, 4.9 Hz, 1H), 6.10 – 5.80 (m, 2H), 2.45 (s, 3H), 1.72 (tt,  $J$  = 6.9, 3.6 Hz, 1H), 1.08 – 0.98 (m, 1H), 0.96 – 0.84 (m, 1H), 0.80 – 0.68 (m, 2H) ppm.

**<sup>13</sup>C NMR (126 MHz, CDCl<sub>3</sub>):** δ = 200.3 (t, *J* = 12.1 Hz), 144.6, 133.6, 129.9, 127.9, 113.5 (t, *J* = 239.4 Hz), 107.1 (t, *J* = 1.3 Hz), 98.2 (t, *J* = 28.7 Hz), 29.0, 21.8, 8.2, 7.7 ppm.

**<sup>19</sup>F NMR (471 MHz, CDCl<sub>3</sub>):** δ = -109.84 ppm.

**HRMS (ESI-TOF) m/z:** [M+Na]<sup>+</sup> calcd for C<sub>14</sub>H<sub>15</sub>F<sub>2</sub>NNaO<sub>2</sub>S 322.0689; Found 322.0694.

**IR (neat):** ν = 1350, 1171, 901, 814 cm<sup>-1</sup>

Compound **1t** *N*-(4,4-difluorobuta-1,2-dien-1-yl)-4-methyl-*N*-(pent-4-en-1-yl)benzenesulfonamide

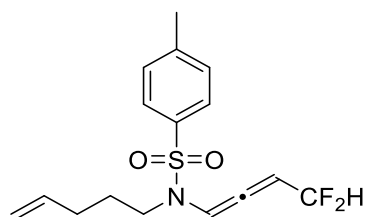

C<sub>16</sub>H<sub>19</sub>F<sub>2</sub>NO<sub>2</sub>S  
MW: 327.40 g.mol<sup>-1</sup>  
Colorless oil  
62%

Only one isomer was described for <sup>13</sup>C-NMR.

**<sup>1</sup>H NMR (500 MHz, CDCl<sub>3</sub>):** δ = 7.68 (d, *J* = 8.3 Hz, 2H), 7.33 (d, *J* = 7.9 Hz, 2H), 7.26 – 7.22 (m, 1H), 6.12 – 5.86 (m, 2H), 5.81 – 5.69 (m, 1H), 5.06 – 4.93 (m, 2H), 3.13 – 3.04 (m, 2H), 2.44 (s, 3H), 2.08 – 1.98 (m, 2H), 1.67 – 1.58 (m, 2H) ppm.

**<sup>13</sup>C NMR (126 MHz, CDCl<sub>3</sub>):** δ = 198.6, 144.2, 137.2, 135.3, 129.9, 127.1, 115.5, 113.0 (t, *J* = 239.8 Hz), 105.1, 99.3 (t, *J* = 28.2 Hz), 46.6, 30.6, 26.5, 21.6 ppm.

**<sup>19</sup>F NMR (471 MHz, CDCl<sub>3</sub>):** δ = -109.52 (d, *J* = 298.5 Hz), -110.30 (d, *J* = 299.5 Hz) ppm.

**HRMS (ESI-TOF) m/z:** [M+Na]<sup>+</sup> calcd for C<sub>16</sub>H<sub>19</sub>F<sub>2</sub>NNaO<sub>2</sub>S 350.0997; Found 350.0994.

**IR (neat):** ν = 1354, 1166, 904, 725 cm<sup>-1</sup>

Compound **1u** *N*-benzyl-4-methyl-*N*-(propa-1,2-dien-1-yl)benzenesulfonamide

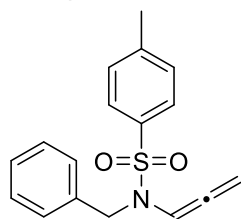

C<sub>17</sub>H<sub>17</sub>NO<sub>2</sub>S  
MW: 299.39 g.mol<sup>-1</sup>  
Colorless oil  
66%

**<sup>1</sup>H NMR (500 MHz, CDCl<sub>3</sub>):** δ = 7.68 (d, *J* = 8.3 Hz, 2H), 7.30 – 7.20 (m, 7H), 6.79 (t, *J* = 6.2 Hz, 1H), 5.10 (d, *J* = 6.2 Hz, 2H), 4.26 (s, 2H), 2.41 (s, 3H) ppm.

Data match with those described in the literature<sup>3</sup>

Compound **2a** (E)-N-(2-azido-4,4,4-trifluorobut-1-en-1-yl)-N-benzyl-4-methylbenzenesulfonamide

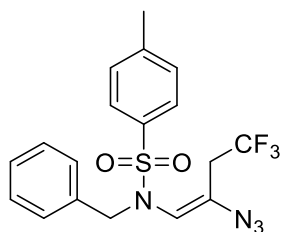

$C_{18}H_{17}F_3N_4O_2S$   
MW: 410.42 g.mol<sup>-1</sup>  
Colorless oil  
84%

**<sup>1</sup>H NMR (300 MHz, CDCl<sub>3</sub>):**  $\delta$  = 7.7 – 7.67 (m, 2H), 7.41 – 7.35 (m, 2H), 7.31 – 7.28 (m, 3H), 7.22 – 7.18 (m, 2H), 5.20 (s, 1H), 4.21 (s, 2H), 3.08 (qd,  $J$  = 10.2, 0.8 Hz, 2H), 2.48 (s, 3H) ppm.

**<sup>13</sup>C NMR (126 MHz, CDCl<sub>3</sub>):**  $\delta$  = 144.5, 138.3 (q,  $J$  = 3.0 Hz), 134.2, 133.9, 130.0, 129.2, 128.7, 128.3, 127.7, 123.9 (q,  $J$  = 278,3 Hz), 117.8, 55.6, 33.4 (q,  $J$  = 31.5 Hz), 21.6 ppm.

**<sup>19</sup>F NMR (282 MHz, CDCl<sub>3</sub>):**  $\delta$  = -62.88 ppm.

**HRMS (ESI-TOF) m/z:** [M+K]<sup>+</sup> calcd for C<sub>18</sub>H<sub>17</sub>F<sub>3</sub>KN<sub>4</sub>O<sub>2</sub>S 449.0656; Found 449.0668.

**IR (neat):**  $\nu$  = 2960, 2112, 1271, 1164 cm<sup>-1</sup>

Compound **2b** (E)-N-(2-azido-4,4,4-trifluorobut-1-en-1-yl)-4-methyl-N-phenethylbenzenesulfonamide

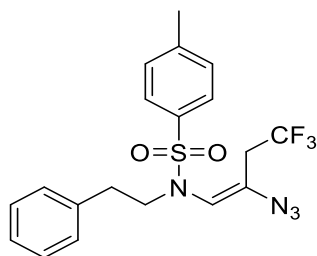

$C_{19}H_{19}F_3N_4O_2S$   
MW: 424.44 g.mol<sup>-1</sup>  
Colorless oil  
91%

**<sup>1</sup>H NMR (300 MHz, CDCl<sub>3</sub>):**  $\delta$  = 7.66 – 7.59 (m, 2H), 7.35 – 7.22 (m, 5H), 7.16 – 7.11 (m, 2H), 5.22 (s, 1H), 3.32 (m, 4H), 2.79 (m, 2H), 2.44 (s, 3H) ppm.

**<sup>13</sup>C NMR (126 MHz, CDCl<sub>3</sub>):**  $\delta$  = 144.5, 138.0 (q,  $J$  = 3.1 Hz), 137.7, 133.5, 129.0, 128.7, 128.7, 127.6, 126.8, 124.4 (q,  $J$  = 275.7 Hz), 118.3, 52.8, 34.6, 33.5 (q,  $J$  = 30.7 Hz), 21.6 ppm.

**<sup>19</sup>F NMR (282 MHz, CDCl<sub>3</sub>):**  $\delta$  = -62.75 ppm.

**HRMS (ESI-TOF) m/z:** [M+K]<sup>+</sup> calcd for C<sub>19</sub>H<sub>19</sub>F<sub>3</sub>KN<sub>4</sub>O<sub>2</sub>S 463.0812; Found 463.0815.

**IR (neat):**  $\nu$  = 2928, 2109, 1341, 1270, 1162, 1091 cm<sup>-1</sup>

Compound **2c** (E)-N-(2-azido-4,4,4-trifluorobut-1-en-1-yl)-N-(benzo[d][1,3]dioxol-5-ylmethyl)-4-methylbenzenesulfonamide

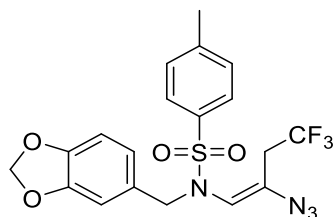

$C_{19}H_{17}F_3N_4O_4S$   
MW: 454.42 g.mol<sup>-1</sup>  
White solid  
mp = 105 - 107 °C  
85%



**<sup>1</sup>H NMR (500 MHz, CDCl<sub>3</sub>):** δ = 7.67 (d, *J* = 8.3 Hz, 2H), 7.38 (d, *J* = 8.0 Hz, 2H), 6.74 – 6.60 (m, 3H), 5.94 (s, 2H), 5.18 (s, 1H), 4.11 (s, 2H), 3.12 (q, *J* = 10.2 Hz, 2H), 2.47 (s, 3H) ppm.

**<sup>13</sup>C NMR (126 MHz, CDCl<sub>3</sub>):** δ = 148.1, 147.8, 144.6, 138.5 (q, *J* = 3.0 Hz), 134.1, 130.1, 128.1, 127.8, 124.2 (q, *J* = 278.4 Hz), 122.9, 117.8, 109.5, 108.3, 101.3, 55.6, 33.5 (q, *J* = 31.5 Hz), 21.7 ppm.

**<sup>19</sup>F NMR (282 MHz, CDCl<sub>3</sub>):** δ = -62.86 ppm.

**HRMS (ESI-TOF) m/z:** [M+K]<sup>+</sup> calcd for C<sub>19</sub>H<sub>17</sub>F<sub>3</sub>KN<sub>4</sub>O<sub>4</sub>S 493.0554; Found 493.0565.

**IR (neat):** ν = 2920, 2115, 1655, 1246, 1167, 1127 cm<sup>-1</sup>

Compound **2d** (*E*)-*N*-(2-azido-4,4,4-trifluorobut-1-en-1-yl)-*N*-(but-3-en-1-yl)-4-methylbenzenesulfonamide

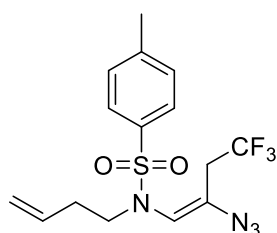

C<sub>15</sub>H<sub>17</sub>F<sub>3</sub>N<sub>4</sub>O<sub>2</sub>S  
MW : 374.38 g.mol<sup>-1</sup>  
colorless oil  
81%

**<sup>1</sup>H NMR (300 MHz, CDCl<sub>3</sub>):** δ = 7.62 (d, *J* = 8.3 Hz, 2H), 7.35 (d, *J* = 8.0 Hz, 2H), 5.70 (ddt, *J* = 17.0, 10.3, 6.6 Hz, 1H), 5.16 (s, 1H), 5.12 – 5.03 (m, 2H), 3.37 (qd, *J* = 10.3, 0.7 Hz, 2H), 3.01 (m, 2H), 2.45 (s, 3H), 2.22 (m, 2H) ppm.

**<sup>13</sup>C NMR (126 MHz, CDCl<sub>3</sub>):** δ = 144.6, 138.1 (q, *J* = 3.1 Hz), 134.3, 133.7, 130.1, 127.8, 121.2 (q, *J* = 270.0 Hz), 118.4, 117.5, 50.9, 33.8 (q, *J* = 30.7 Hz), 32.2, 21.7 ppm.

**<sup>19</sup>F NMR (282 MHz, CDCl<sub>3</sub>):** δ = -62.74 ppm.

**HRMS (ESI-TOF) m/z:** [M+H]<sup>+</sup> calcd for C<sub>15</sub>H<sub>18</sub>F<sub>3</sub>N<sub>4</sub>O<sub>2</sub>S 375.1097; Found 375.1105.

**IR (neat):** ν = 2111, 1343, 1271, 1164 cm<sup>-1</sup>

Compound **2e** (*E*)-*N*-(2-azido-4,4,4-trifluorobut-1-en-1-yl)-4-methyl-*N*-(pent-4-en-1-yl)benzenesulfonamide

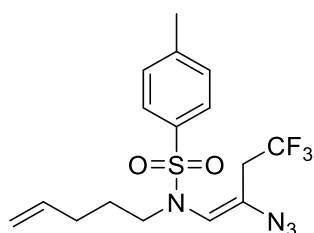

C<sub>16</sub>H<sub>19</sub>F<sub>3</sub>N<sub>4</sub>O<sub>2</sub>S  
MW : 388.41 g.mol<sup>-1</sup>  
colorless oil  
81%

**<sup>1</sup>H NMR (300 MHz, CDCl<sub>3</sub>):** δ = 7.61 – 7.65 (m, 2H), 7.38– 7.32 (m, 2H), 5.74 (ddt, *J* = 16.9, 10.2, 6.6 Hz, 1H), 5.14 (s, 1H), 5.05 – 4.96 (m, 2H), 3.39 (q, *J* = 10.2 Hz, 2H) 3.02 – 2.99 (m, 2H), 2.45 (s, 3H), 2.08 – 2.02 (m, 2H), 1.59 – 1.52 (m, 2H) ppm.

**<sup>13</sup>C NMR (126 MHz, CDCl<sub>3</sub>):** δ = 144.5, 137.8 (q, *J* = 3.08 Hz), 137.2, 133.7, 130.0, 127.7, 124.5 (q, *J* = 279.0 Hz), 118.7, 115.7, 51.1, 33.7 (q, *J* = 31.2 Hz), 30.9, 27.1, 21.7 ppm.

**<sup>19</sup>F NMR (282 MHz, CDCl<sub>3</sub>):** δ = -62.91 ppm.

**HRMS (ESI-TOF) m/z:**  $[M+Na]^+$  calcd for  $C_{16}H_{19}F_3NaN_4O_2S$  411.1073; Found 411.1078.

**IR (neat):**  $\nu = 2928, 2861, 2110, 1271, 1163 \text{ cm}^{-1}$

Compound **2f** (*E*)-*N*-(2-azido-4,4,4-trifluorobut-1-en-1-yl)-4-methyl-*N*-(2,2,2-trifluoroethyl)benzenesulfonamide

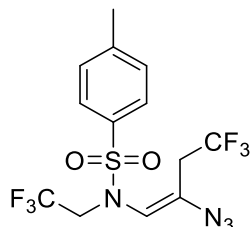

$C_{13}H_{12}F_6N_4O_2S$   
MW: 402.32  $\text{g}\cdot\text{mol}^{-1}$   
white solid  
88%

**$^1\text{H}$  NMR (500 MHz,  $\text{CDCl}_3$ ):**  $\delta = 7.67$  (d,  $J = 8.4$  Hz, 2H), 7.43 (d,  $J = 8.1$  Hz, 2H), 5.35 (s, 1H), 3.75 (q,  $J = 8.3$  Hz, 2H), 3.32 (q,  $J = 10.2$  Hz, 2H), 2.49 (s, 3H) ppm.

**$^{13}\text{C}$  NMR (125 MHz,  $\text{CDCl}_3$ ):**  $\delta = 145.5$ , 140.1 (q,  $J = 3.0$  Hz), 133.7, 130.4, 127.8, 124.2 (q,  $J = 277.9$  Hz), 123.6 (q,  $J = 280.4$  Hz), 117.1, 51.9 (q,  $J = 34.1$  Hz), 33.3 (q,  $J = 31.9$  Hz), 21.8 ppm.

**$^{19}\text{F}$  NMR (282 MHz,  $\text{CDCl}_3$ ):**  $\delta = -62.55$  (q,  $J = 3.0$  Hz),  $-69.39$  (q,  $J = 3.0$  Hz) ppm.

**HRMS (ESI-TOF) m/z:**  $[M+K]^+$  calcd for  $C_{13}H_{12}F_6KN_4O_2S$  441.0217; Found 441.0226.

**IR (neat):**  $\nu = 2933, 2117, 1270, 1166, 1089 \text{ cm}^{-1}$

Compound **2g** *N*-((*E*)-2-azido-4,4,4-trifluorobut-1-en-1-yl)-*N*-(2-((3*aR*,7*aS*)-1,3-dioxo-1,3,3*a*,4,7,7*a*-hexahydro-2*H*-isoindol-2-yl)ethyl)-4-methylbenzenesulfonamide

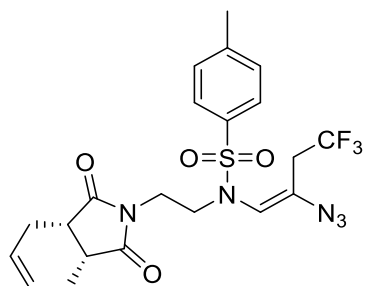

$C_{21}H_{22}F_3N_5O_4S$   
MW: 497.49  $\text{g}\cdot\text{mol}^{-1}$   
Colorless oil  
63%

**$^1\text{H}$  NMR (300 MHz,  $\text{CDCl}_3$ ):**  $\delta = 7.58$  (d,  $J = 8.3$  Hz, 2H), 7.33 (d,  $J = 8.1$  Hz, 2H), 5.94 – 5.83 (m, 2H), 5.29 (s, 1H), 3.70 – 3.54 (m, 2H), 3.32 (q,  $J = 10.1$  Hz, 2H), 3.23 – 3.13 (m, 4H), 2.60 (m, 2H), 2.44 (s, 3H), 2.31 – 2.21 (m, 2H) ppm.

**$^{13}\text{C}$  NMR (126 MHz,  $\text{CDCl}_3$ ):**  $\delta = 180.4$ , 144.8, 138.9 (q,  $J = 3.1$  Hz), 133.8, 130.2, 127.9, 127.7, 124.6 (q,  $J = 278.3$  Hz), 118.4, 49.1, 39.3, 37.2, 33.4 (q,  $J = 31.4$  Hz), 23.5, 21.7 ppm.

**$^{19}\text{F}$  NMR (282 MHz,  $\text{CDCl}_3$ ):**  $\delta = -62.56$  ppm.

**HRMS (ESI-TOF) m/z:**  $[M+H]^+$  calcd for  $C_{21}H_{23}F_3N_5O_4S$  498.1417; Found 498.1429.

**IR (neat):**  $\nu = 2927, 2361, 2113, 1699, 1162, 906, 727 \text{ cm}^{-1}$

Compound **2h** (*E*-*N*-(2-azido-4,4,4-trifluorobut-1-en-1-yl)-4-methyl-*N*-(2-(2-oxocyclohexyl)ethyl)benzenesulfonamide

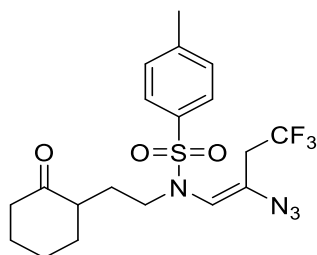

$C_{19}H_{23}F_3N_4O_3S$   
MW: 444.47 g.mol<sup>-1</sup>  
Colorless oil  
74%

**<sup>1</sup>H NMR (400 MHz, CDCl<sub>3</sub>):**  $\delta$  = 7.61 – 7.56 (m, 2H), 7.36 – 7.31 (m, 2H), 5.17 (s, 1H), 3.59 – 3.44 (m, 1H), 3.31 – 3.14 (m, 2H), 2.97 – 2.89 (m, 1H), 2.44 (s, 3H), 2.43 – 2.31 (m, 3H), 2.12 – 1.25 (m, 8H) ppm.

**<sup>13</sup>C NMR (126 MHz, CDCl<sub>3</sub>):**  $\delta$  = 212.6, 144.6, 137.6 (q,  $J$  = 2.8 Hz), 133.6, 130.1, 127.7, 124.5 (q,  $J$  = 278.2 Hz), 118.9, 49.7, 47.7, 42.4, 34.6, 33.8 (q,  $J$  = 32.1 Hz), 28.3, 28.1, 25.4, 21.7 ppm.

**<sup>19</sup>F NMR (282 MHz, CDCl<sub>3</sub>):**  $\delta$  = -62.88 ppm.

**HRMS (ESI-TOF) m/z:** [M+K]<sup>+</sup> calcd for C<sub>19</sub>H<sub>23</sub>F<sub>3</sub>KN<sub>4</sub>O<sub>3</sub>S 483.1075; Found 483.1092.

**IR (neat):**  $\nu$  = 2935, 2864, 2112, 1710, 1342, 1272, 1164 cm<sup>-1</sup>

Compound **2i** (*E*-*N*-(2-azido-4,4,4-trifluorobut-1-en-1-yl)-*N*-phenethylmethanesulfonamide

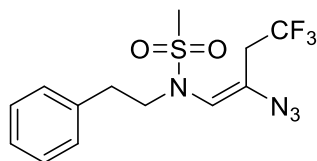

$C_{13}H_{15}F_3N_4O_2S$   
MW: 348.34 g.mol<sup>-1</sup>  
Colorless oil  
73%

**<sup>1</sup>H NMR (300 MHz, CDCl<sub>3</sub>):**  $\delta$  = 7.26 – 7.12 (m, 5H), 5.57 (s, 1H), 3.45 (m, 2H), 3.19 (q,  $J$  = 10.2, 2H), 2.82 (m, 2H), 2.70 (s, 3H) ppm.

**<sup>13</sup>C NMR (126 MHz, CDCl<sub>3</sub>):**  $\delta$  = 138.6 (q,  $J$  = 3.0 Hz), 137.7, 128.9, 128.9, 127.1, 124.4 (q,  $J$  = 277.6 Hz), 117.5, 53.2, 36.3, 34.9, 33.6 (q,  $J$  = 31.4 Hz) ppm.

**<sup>19</sup>F NMR (282 MHz, CDCl<sub>3</sub>):**  $\delta$  = -62.76 ppm.

**HRMS (ESI-TOF) m/z:** [M+Na]<sup>+</sup> calcd for C<sub>13</sub>H<sub>15</sub>F<sub>3</sub>N<sub>4</sub>NaO<sub>2</sub>S 371.0760; Found 371.0750.

**IR (neat):**  $\nu$  = 3028, 2112, 1336, 1270, 1150 cm<sup>-1</sup>

Compound **2j** (*E*-2-(2-azido-4,4,4-trifluorobut-1-en-1-yl)-2,3-dihydrobenzo[d]isothiazole 1,1-dioxide

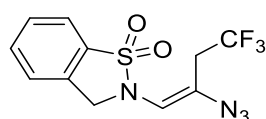

$C_{11}H_9F_3N_4O_2S$   
MW: 318.27 g.mol<sup>-1</sup>  
White solid  
81%

**<sup>1</sup>H NMR (300 MHz, CDCl<sub>3</sub>):**  $\delta$  = 7.83 (ddd,  $J$  = 7.7, 1.2, 0.6 Hz, 1H), 7.67 (td,  $J$  = 7.5, 1.2 Hz, 1H), 7.62 – 7.54 (m, 1H), 7.43 (dt,  $J$  = 7.7, 1.0 Hz, 1H), 5.93 (s, 1H), 4.46 (s, 2H), 3.34 (q,  $J$  = 10.2 Hz, 2H) ppm.

**<sup>13</sup>C NMR (126 MHz, CDCl<sub>3</sub>):** δ = 139.3 (q, *J* = 2.9 Hz), 134.2, 133.5, 133.3, 129.7, 124.8, 124.5 (q, *J* = 277.9 Hz), 122.0, 114.4, 53.1, 33.4 (q, *J* = 31.4 Hz) ppm.

**<sup>19</sup>F NMR (282 MHz, CDCl<sub>3</sub>):** δ = -64.15 ppm.

**HRMS (ESI-TOF) m/z:** [M+Na]<sup>+</sup> calcd for C<sub>11</sub>H<sub>9</sub>F<sub>3</sub>N<sub>4</sub>NaO<sub>2</sub>S 341.0291; Found 341.0290.

**IR (neat):** ν = 3267, 2114, 2114, 1654, 1251, 1156, 756 cm<sup>-1</sup>

Compound 2k (E)-3-(2-azido-4,4,4-trifluorobut-1-en-1-yl)oxazolidin-2-one

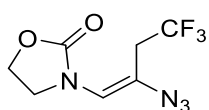

C<sub>7</sub>H<sub>7</sub>F<sub>3</sub>N<sub>4</sub>O<sub>2</sub>  
MW: 236.15 g.mol<sup>-1</sup>  
Colorless oil  
45%

**<sup>1</sup>H NMR (500 MHz, C<sub>6</sub>D<sub>6</sub>):** δ = 4.86 (qt, *J* = 8.0, 0.7 Hz, 1H), 3.61 (dt, *J* = 1.9, 0.9 Hz, 2H), 3.31 – 3.23 (m, 2H), 2.30 – 2.23 (m, 2H) ppm.

**<sup>13</sup>C NMR (126 MHz, C<sub>6</sub>D<sub>6</sub>):** δ = 157.5, 147.9 (q, *J* = 5.3 Hz), 123.7 (q, *J* = 269.3 Hz), 105.7 (q, *J* = 36.4 Hz), 61.2, 43.4, 42.4 (q, *J* = 2.1 Hz) ppm.

**<sup>19</sup>F NMR (471 MHz, C<sub>6</sub>D<sub>6</sub>):** δ = -53.94 ppm.

**HRMS (ESI-TOF) m/z:** [M+Na]<sup>+</sup> calcd for C<sub>7</sub>H<sub>7</sub>F<sub>3</sub>N<sub>4</sub>NaO<sub>2</sub> 259.0413; Found 259.0410.

**IR (neat):** ν = 2992, 2110, 1712 cm<sup>-1</sup>

Compound 2l ethyl (E)-3-azido-4-((N-benzyl-4-methylphenyl)sulfonamido)but-3-enoate

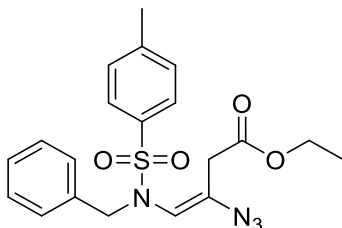

C<sub>20</sub>H<sub>22</sub>N<sub>4</sub>O<sub>4</sub>S  
MW: 414.48 g.mol<sup>-1</sup>  
White solid  
mp = 76 - 78 °C  
65% over 2 steps

**<sup>1</sup>H NMR (500 MHz, CDCl<sub>3</sub>):** δ = 7.69 (d, *J* = 8.6 Hz, 2H), 7.36 (d, *J* = 8.6 Hz, 2H), 7.32 – 7.27 (m, 3H), 7.25 – 7.22 (m, 2H), 5.05 (s, 1H), 4.06 (q, *J* = 7.2 Hz, 2H), 3.31 (s, 2H), 2.46 (s, 3H), 1.23 (t, *J* = 7.1 Hz, 3H) ppm.

**<sup>13</sup>C NMR (126 MHz, CDCl<sub>3</sub>):** δ = 168.2, 144.3, 140.8, 135.2, 134.3, 130.0, 129.1, 128.7, 128.1, 127.8, 115.6, 61.3, 55.6, 34.0, 21.7, 14.2 ppm.

**HRMS (ESI-TOF) m/z:** [M+Na]<sup>+</sup> calcd for C<sub>20</sub>H<sub>22</sub>N<sub>4</sub>NaO<sub>4</sub>S 437.1254; Found 437.1283.

**IR (neat):** ν = 2982, 2360, 2109, 1737, 1348, 1164, 740 cm<sup>-1</sup>

Compound **2m** benzyl (E)-3-azido-4-((N-(benzo[d][1,3]dioxol-5-ylmethyl)-4-methylphenyl)sulfonamido)but-3-enoate

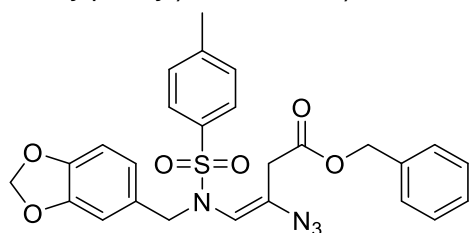

C<sub>26</sub>H<sub>24</sub>N<sub>4</sub>O<sub>6</sub>S  
MW: 520.56 g.mol<sup>-1</sup>  
White solid  
61% over 2 steps

**<sup>1</sup>H NMR (500 MHz, CDCl<sub>3</sub>):** δ = 7.66 (d, *J* = 8.4 Hz, 2H), 7.41 – 7.29 (m, 7H), 6.77 – 6.71 (m, 1H), 6.69 – 6.59 (m, 2H), 5.90 (s, 2H), 5.09 (s, 2H), 5.04 (s, 1H), 4.09 (s, 2H), 3.40 (s, 2H), 2.45 (s, 3H) ppm.

**<sup>13</sup>C NMR (126 MHz, CDCl<sub>3</sub>):** δ = 168.1, 147.9, 147.4, 144.2, 140.5, 135.4, 134.1, 129.9, 128.8, 128.6, 128.4, 128.3, 127.7, 122.5, 115.5, 109.2, 108.2, 101.2, 67.0, 55.3, 33.9, 21.7 ppm.

**HRMS (ESI-TOF) m/z:** [M+Na]<sup>+</sup> calcd for C<sub>26</sub>H<sub>24</sub>N<sub>4</sub>NaS 543.1308; Found 543.1315.

**IR (neat):** ν = 3033, 2897, 2108, 1737, 1489, 1445, 1243, 1160, 1036, 730 cm<sup>-1</sup>

Compound **2n** 4-methoxybenzyl (E)-3-azido-4-((N-cyclopropyl-4-methylphenyl)sulfonamido)but-3-enoate

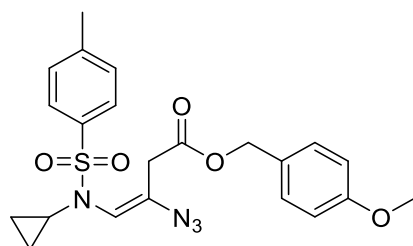

C<sub>22</sub>H<sub>24</sub>N<sub>4</sub>O<sub>5</sub>S  
MW: 456.52 g.mol<sup>-1</sup>  
Colorless oil  
36% over 2 steps

**<sup>1</sup>H NMR (400 MHz, CDCl<sub>3</sub>):** δ = 7.68 (d, *J* = 8.3 Hz, 2H), 7.35 – 7.29 (m, 6H), 6.89 (d, *J* = 8.7 Hz, 2H), 5.20 (s, 1H), 5.11 (s, 2H), 3.81 (s, 3H), 3.47 (s, 2H), 2.44 (s, 3H), 2.02 (tt, *J* = 6.8, 3.5 Hz, 1H), 0.82 – 0.74 (m, 2H), 0.74 – 0.53 (m, 2H) ppm.

**<sup>13</sup>C NMR (126 MHz, CDCl<sub>3</sub>):** δ = 168.8, 159.9, 144.4, 138.7, 133.3, 130.4, 129.9, 128.2, 127.6, 117.2, 114.1, 67.2, 55.5, 34.4, 32.5, 21.7, 7.2, 6.3 ppm.

**HRMS (ESI-TOF) m/z:** [M+Na]<sup>+</sup> calcd for C<sub>22</sub>H<sub>24</sub>N<sub>4</sub>NaO<sub>5</sub>S 479.1360; Found 479.1354.

**IR (neat):** ν = 3275, 2925, 2110, 1737, 1516, 1164, 816 cm<sup>-1</sup>

Compound **2o** N-((1E)-2-azido-4-fluorobuta-1,3-dien-1-yl)-N-benzyl-4-methylbenzenesulfonamide

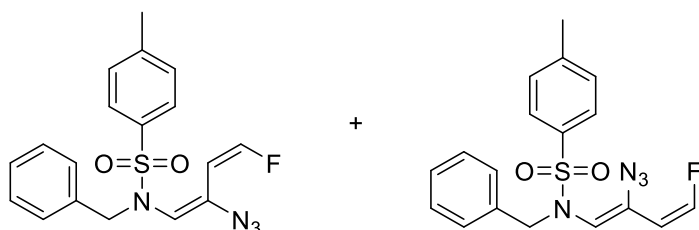

C<sub>18</sub>H<sub>17</sub>FN<sub>4</sub>O<sub>2</sub>S  
MW: 374.42 g.mol<sup>-1</sup>  
White solid  
80%, **6:4 dr**

Only one diastereoisomer was described for <sup>13</sup>C-NMR.

**<sup>1</sup>H NMR (500 MHz, CDCl<sub>3</sub>):** δ = 7.77 – 7.67 (m, 4H), 7.39 – 7.27 (m, 11H), 7.25 – 7.22 (m, 3H), 6.88 (ddd, *J* = 58.8, 11.0, 0.5 Hz, 1H), 6.87 (ddd, *J* = 82.0, 10.9, 0.5 Hz, 1H), 6.07 (ddd, *J* = 17.6, 11.0, 0.7 Hz, 1H), 5.62 (ddd, *J* = 16.6, 10.8, 0.6 Hz, 1H), 5.12 – 5.10 (m, 2H), 5.06 – 5.06 (m, 2H), 4.30 (s, 2H), 4.25 (s, 2H), 2.47 (s, 6H) ppm.

**<sup>13</sup>C NMR (126 MHz, CDCl<sub>3</sub>):** δ = 154.2 (d, *J* = 268.0 Hz), 144.4, 140.6, 135.0, 134.4, 130.1, 129.1, 128.8, 128.3, 127.8, 113.6 (d, *J* = 10.8 Hz), 106.2 (d, *J* = 21.9 Hz), 55.7, 21.7 ppm.

**<sup>19</sup>F NMR (471 MHz, CDCl<sub>3</sub>):** δ = -122.76, -124.58 ppm.

**IR (neat):** ν = 3032, 2926, 1018, 1663, 1349, 1164, 1092 cm<sup>-1</sup>

Compound **2p** *N*-((3*Z*)-2-azido-4-fluorobuta-1,3-dien-1-yl)-*N*-cyclopropyl-4-methylbenzenesulfonamide

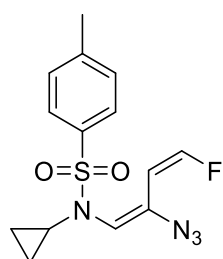

+

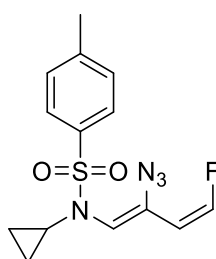

C<sub>14</sub>H<sub>15</sub>FN<sub>4</sub>O<sub>2</sub>S  
MW: 322.36 g.mol<sup>-1</sup>  
Colorless oil  
82%, **8:2 dr**

Only one diastereoisomer was described for <sup>13</sup>C-NMR.

**<sup>1</sup>H NMR (500 MHz, CDCl<sub>3</sub>):** δ = 7.77 – 7.66 (m, 4H), 7.39 – 7.30 (m, 4H), 7.05 (ddd, *J* = 82.0, 11.1, 0.3 Hz, 1H), 7.04 (ddd, *J* = 81.8, 10.6, 0.7 Hz, 1H), 6.22 (ddd, *J* = 17.6, 11.0, 0.7 Hz, 1H), 5.72 (ddd, *J* = 17.3, 10.8, 0.4 Hz, 1H), 5.25 (dt, *J* = 1.5, 0.7 Hz, 2H), 5.21 – 5.20 (m, 2H), 2.45 (s, 6H), 2.16 (tt, *J* = 6.8, 3.4 Hz, 1H), 2.10 (tt, *J* = 6.8, 3.5 Hz, 1H), 0.89 (m, 8H) ppm.

**<sup>13</sup>C NMR (126 MHz, CDCl<sub>3</sub>):** δ = 154.2 (d, *J* = 267.7 Hz), 144.4, 138.6, 133.5, 129.9, 128.1, 115.1 (d, *J* = 11.1 Hz), 106.2 (d, *J* = 21.6 Hz), 32.7, 21.7, 7.4 ppm.

**<sup>19</sup>F NMR (471 MHz, CDCl<sub>3</sub>):** δ = -122.91, -125.12 ppm.

**IR (neat):** ν = 2934, 2117, 1648, 1358, 1170, 1132 cm<sup>-1</sup>

Compound **2q** *N*-((3*Z*)-2-azido-4-fluorobuta-1,3-dien-1-yl)-4-methyl-*N*-(pent-4-en-1-yl)benzenesulfonamide

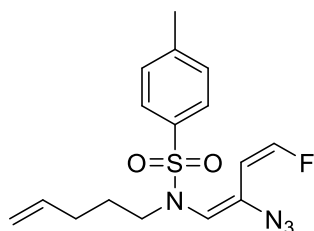

+

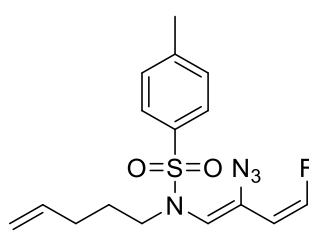

C<sub>16</sub>H<sub>19</sub>FN<sub>4</sub>O<sub>2</sub>S  
MW: 350.41 g.mol<sup>-1</sup>  
Colorless oil  
75%, **8:2 dr**

Only one diastereoisomer was described for <sup>13</sup>C-NMR.

**<sup>1</sup>H NMR (500 MHz, CDCl<sub>3</sub>):** δ = 7.72 – 7.59 (m, 4H), 7.38 – 7.31 (m, 4H), 7.08 (ddd, *J* = 81.8, 10.9, 0.5 Hz, 1H), 7.06 (ddd, *J* = 82.0, 10.8, 0.5 Hz, 1H), 6.37 (ddd, *J* = 17.5, 11.0, 0.6 Hz, 1H), 5.82 – 5.68 (m, 3H), 5.10 – 4.97 (m, 6H), 3.14 – 3.03 (m, 4H), 2.44 (s, 6H), 2.08 (m, 4H), 1.69 – 1.52 (m, 4H) ppm.

**<sup>13</sup>C NMR (126 MHz, CDCl<sub>3</sub>):** δ = 154.5 (d, *J* = 268.1 Hz), 144.2, 140.3 (d, *J* = 11.9 Hz), 137.3, 134.2, 130.0, 127.7, 115.8, 114.0 (d, *J* = 11.1 Hz), 106.5 (d, *J* = 21.8 Hz), 51.0, 30.9, 27.6, 21.7 ppm.

**<sup>19</sup>F NMR (471 MHz, CDCl<sub>3</sub>):** δ = -122.37, -124.94 ppm.

**IR (neat):** ν = 3099, 2926, 2110, 1349, 1164, 1109 cm<sup>-1</sup>

Compound **3a** (*E*)-*N*-(3-azido-4,4,4-trifluorobut-1-en-1-yl)-*N*-benzyl-4-methylbenzenesulfonamide

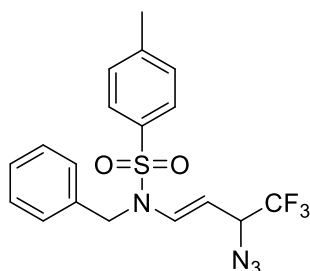

C<sub>18</sub>H<sub>17</sub>F<sub>3</sub>N<sub>4</sub>O<sub>2</sub>S  
MW: 410.42 g.mol<sup>-1</sup>  
Colorless oil  
91%

**<sup>1</sup>H NMR (300 MHz, CDCl<sub>3</sub>):** δ = 7.69 (d, *J* = 8.4 Hz, 2H), 7.34 (d, *J* = 7.9 Hz, 2H), 7.31 – 7.19 (m, 6H), 4.63 – 4.49 (m, 3H), 4.28 – 4.13 (m, 1H), 2.45 (s, 3H) ppm.

**<sup>13</sup>C NMR (126 MHz, CDCl<sub>3</sub>):** δ = 144.8, 135.5, 134.9, 133.9, 130.3, 128.9, 128.0, 127.2, 126.9, 123.5 (q, *J* = 280.9 Hz), 98.0 (q, *J* = 1.9 Hz), 62.7 (q, *J* = 32.0 Hz), 49.6, 21.8 ppm.

**<sup>19</sup>F NMR (282 MHz, CDCl<sub>3</sub>):** δ = -75.85 ppm.

**HRMS (ESI-TOF) m/z:** [M+K]<sup>+</sup> calcd for C<sub>18</sub>H<sub>17</sub>F<sub>3</sub>KN<sub>4</sub>O<sub>2</sub>S 449.0656; Found 449.0649.

**IR (neat):** ν = 2113, 1655, 1262, 1167, 1126 cm<sup>-1</sup>

Compound **3b** (*E*)-*N*-(3-azido-4,4,4-trifluorobut-1-en-1-yl)-*N*-(4-fluorobenzyl)-4-methylbenzenesulfonamide

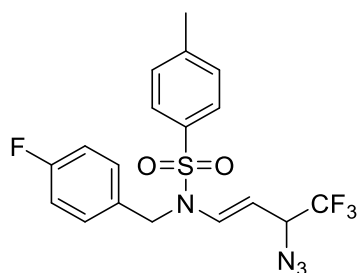

C<sub>18</sub>H<sub>16</sub>F<sub>4</sub>N<sub>4</sub>O<sub>2</sub>S  
MW: 428.41 g.mol<sup>-1</sup>  
Colorless oil  
94%

**<sup>1</sup>H NMR (500 MHz, CDCl<sub>3</sub>):** δ = 7.68 (d, *J* = 8.3 Hz, 2H), 7.34 (d, *J* = 7.9 Hz, 2H), 7.24 (d, *J* = 14.5 Hz, 1H), 7.22 – 7.18 (m, 2H), 7.03 – 6.95 (m, 2H), 4.58 – 4.45 (m, 3H), 4.25 – 4.15 (m, 1H), 2.45 (s, 3H) ppm.

**<sup>13</sup>C NMR (126 MHz, CDCl<sub>3</sub>):** δ = 162.5 (d, *J* = 246.6 Hz), 145.0, 135.4, 134.8, 130.3, 129.7 (d, *J* = 3.1 Hz), 128.7 (d, *J* = 8.2 Hz), 127.1, 123.5 (q, *J* = 280.8 Hz), 115.9 (d, *J* = 21.8 Hz), 98.1 (q, *J* = 2.2 Hz), 62.7 (q, *J* = 32.0 Hz), 48.9, 21.7 ppm.

**<sup>19</sup>F NMR (282 MHz, CDCl<sub>3</sub>):** δ = -75.84, -114.31 ppm.

**HRMS (ESI-TOF) m/z:** [M+Na]<sup>+</sup> calcd for C<sub>18</sub>H<sub>16</sub>F<sub>4</sub>N<sub>4</sub>NaO<sub>2</sub>S 451.0828; Found 451.0831.

**IR (neat):** ν = 2112, 1654, 1510, 1165, 1123, 1035, 812 cm<sup>-1</sup>

Compound 3c (*E*)-*N*-(3-azido-4,4,4-trifluorobut-1-en-1-yl)-*N*-(benzo[d][1,3]dioxol-5-ylmethyl)-4-methylbenzenesulfonamide

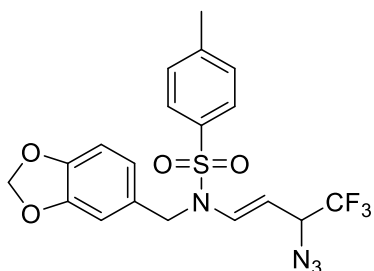

C<sub>19</sub>H<sub>17</sub>F<sub>3</sub>N<sub>4</sub>O<sub>4</sub>S  
MW: 454.42 g.mol<sup>-1</sup>  
Colorless oil  
95%

**<sup>1</sup>H NMR (500 MHz, CDCl<sub>3</sub>):** δ = 7.61 (d, *J* = 8.3 Hz, 2H), 7.27 (d, *J* = 7.8 Hz, 2H), 7.15 (d, *J* = 14.1 Hz, 1H), 6.72 – 6.54 (m, 3H), 5.86 (q, *J* = 1.4 Hz, 2H), 4.52 (dd, *J* = 14.1, 8.9 Hz, 1H), 4.43 (d, *J* = 15.9 Hz, 1H), 4.28 (d, *J* = 15.9 Hz, 1H), 4.13 (dq, *J* = 8.4, 6.5 Hz, 1H), 2.38 (s, 2H) ppm.

**<sup>13</sup>C NMR (126 MHz, CDCl<sub>3</sub>):** δ = 148.3, 147.3, 144.7, 135.3, 134.7, 130.1, 127.6, 127.0, 123.4 (q, *J* = 280.9 Hz), 120.4, 108.3, 107.3, 101.2, 97.9 (q, *J* = 1.8 Hz), 62.6 (q, *J* = 32.0 Hz), 49.3, 21.6 ppm.

**<sup>19</sup>F NMR (282 MHz, CDCl<sub>3</sub>):** δ = -75.79 ppm.

**HRMS (ESI-TOF) m/z:** [M+K]<sup>+</sup> calcd for C<sub>19</sub>H<sub>17</sub>F<sub>3</sub>KN<sub>4</sub>O<sub>4</sub>S 493.0554; Found 493.0565.

**IR (neat):** ν = 2361, 2114, 1655, 1491, 1245, 1167, 1126, 1038 cm<sup>-1</sup>

Compound 3d (*E*)-*N*-(3-azido-4,4,4-trifluorobut-1-en-1-yl)-4-methyl-*N*-(pyridin-3-ylmethyl)benzenesulfonamide

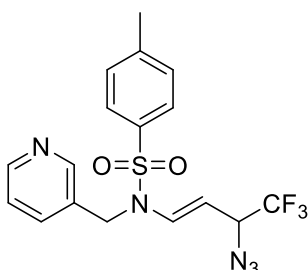

C<sub>17</sub>H<sub>16</sub>F<sub>3</sub>N<sub>5</sub>O<sub>2</sub>S  
MW: 411.40 g.mol<sup>-1</sup>  
Colorless oil  
83%

**<sup>1</sup>H NMR (400 MHz, CDCl<sub>3</sub>):** δ = 8.52 (d, *J* = 21.8 Hz, 1H), 7.69 (d, *J* = 8.4 Hz, 2H), 7.64 (dt, *J* = 8.1, 1.9 Hz, 1H), 7.35 (dt, *J* = 8.0, 0.7 Hz, 2H), 7.31 – 7.24 (m, 3H), 4.63 – 4.53 (m, 2H), 4.52 (dd, *J* = 14.1, 8.7 Hz, 1H), 4.29 – 4.17 (m, 1H), 2.45 (s, 3H) ppm.

**<sup>13</sup>C NMR (126 MHz, CDCl<sub>3</sub>):** δ = 149.2, 148.2, 145.2, 135.1, 135.0, 134.5, 130.4, 130.1, 127.2, 124.0, 123.5 (d, *J* = 281.0 Hz), 98.2 (q, *J* = 1.8 Hz), 62.5 (q, *J* = 32.1 Hz), 47.0, 21.8 ppm.

**<sup>19</sup>F NMR (471 MHz, CDCl<sub>3</sub>):** δ = -75.78 ppm.

**HRMS (ESI-TOF) m/z:** [M+K]<sup>+</sup> calcd for C<sub>19</sub>H<sub>17</sub>F<sub>3</sub>KN<sub>4</sub>O<sub>4</sub>S 412.1055; Found 412.1060.

**IR (neat):** ν = 2958, 2112, 1658, 1129 cm<sup>-1</sup>



Compound **3e** (*E*)-*N*-(3-azido-4,4,4-trifluorobut-1-en-1-yl)-*N*,4-dimethylbenzenesulfonamide

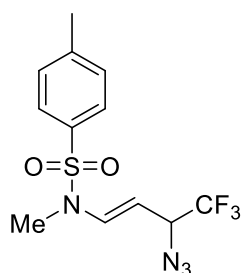

$C_{12}H_{13}F_3N_4O_2S$   
MW: 334.32 g.mol<sup>-1</sup>  
Colorless oil  
89%

**<sup>1</sup>H NMR (300 MHz, CDCl<sub>3</sub>):** δ = 7.64 (d, *J* = 8.4 Hz, 2H), 7.36 – 7.26 (m, 3H), 4.61 (dd, *J* = 13.9, 8.9 Hz, 1H), 4.40 – 4.24 (m, 1H), 2.91 (s, 3H), 2.44 (s, 3H) ppm.

**<sup>13</sup>C NMR (126 MHz, CDCl<sub>3</sub>):** δ = 144.8, 136.8, 134.3, 130.2, 127.1, 123.7 (q, *J* = 280.4 Hz), 96.4 (q, *J* = 1.9 Hz), 62.8 (q, *J* = 32.1 Hz), 32.1, 21.7 ppm.

**<sup>19</sup>F NMR (282 MHz, CDCl<sub>3</sub>):** δ = -75.65 ppm.

**HRMS (ESI-TOF) m/z:** [M+K]<sup>+</sup> calcd for C<sub>12</sub>H<sub>13</sub>F<sub>3</sub>KN<sub>4</sub>O<sub>2</sub>S 373.0348; Found 373.0341.

**IR (neat):** ν = 2113, 1652, 1161, 1126 cm<sup>-1</sup>

Compound **3f** (*E*)-*N*-(3-azido-4,4,4-trifluorobut-1-en-1-yl)-*N*-cyclopropyl-4-methylbenzenesulfonamide

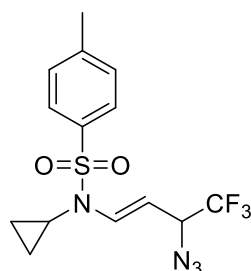

$C_{14}H_{15}F_3N_4O_2S$   
MW: 360.36 g.mol<sup>-1</sup>  
Colorless oil  
86%

**<sup>1</sup>H NMR (500 MHz, CDCl<sub>3</sub>):** δ = 7.69 (d, *J* = 8.3 Hz, 2H), 7.34 (d, *J* = 8.0 Hz, 2H), 7.20 (d, *J* = 14.0 Hz, 1H), 5.06 (dd, *J* = 14.0, 9.1 Hz, 1H), 4.37 – 4.26 (m, 1H), 2.44 (s, 3H), 1.81 (tt, *J* = 6.9, 3.7 Hz, 1H), 1.10 – 0.95 (m, 2H), 0.95 – 0.82 (m, 2H) ppm.

**<sup>13</sup>C NMR (126 MHz, CDCl<sub>3</sub>):** δ = 144.8, 137.9, 134.0, 130.0, 127.6, 123.7 (q, *J* = 280.6 Hz), 99.4 (d, *J* = 2.2 Hz), 62.8 (q, *J* = 32.0 Hz), 27.0, 21.7, 8.1, 8.1 ppm.

**<sup>19</sup>F NMR (282 MHz, CDCl<sub>3</sub>):** δ = -75.70 ppm.

**HRMS (ESI-TOF) m/z:** [M+Na]<sup>+</sup> calcd for C<sub>14</sub>H<sub>15</sub>F<sub>3</sub>N<sub>4</sub>NaO<sub>2</sub>S 383.0766; Found 383.0772.

**IR (neat):** ν = 2114, 1651, 1366, 1171, 1131 cm<sup>-1</sup>

Compound **3g** (*E*)-*N*-(3-azido-4,4,4-trifluorobut-1-en-1-yl)-*N*-(4-cyanobutyl)-4-methylbenzenesulfonamide

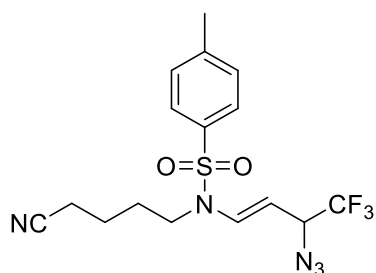

C<sub>16</sub>H<sub>18</sub>F<sub>3</sub>N<sub>5</sub>O<sub>2</sub>S  
MW: 401.41 g.mol<sup>-1</sup>  
Colorless oil  
65%

**<sup>1</sup>H NMR (400 MHz, CDCl<sub>3</sub>):** δ = 7.64 (d, *J* = 8.4 Hz, 2H), 7.34 (d, *J* = 8.6, Hz, 2H), 7.18 (d, *J* = 14.2, 1H), 4.67 (dd, *J* = 14.2, 8.8 Hz, 1H), 4.39–4.27 (m, 1H), 3.43–3.34 (m, 2H), 2.44 (s, 3H), 2.42–2.38 (m, 2H), 1.82–1.65 (m, 4H) ppm.

**<sup>13</sup>C NMR (126 MHz, CDCl<sub>3</sub>):** δ = 145.0, 135.1, 135.0, 130.3, 127.0, 123.6 (q, *J* = 280.8 Hz), 119.2, 96.9 (q, *J* = 1.9 Hz), 62.9 (q, *J* = 32.0 Hz), 44.4, 25.3, 22.5, 21.7, 16.8 ppm.

**HRMS (ESI-TOF) m/z:** [M+K]<sup>+</sup> calcd for C<sub>16</sub>H<sub>18</sub>F<sub>3</sub>KN<sub>5</sub>O<sub>2</sub>S 440.0770; Found 440.0779.

**<sup>19</sup>F NMR (471 MHz, CDCl<sub>3</sub>):** δ = -75.61 ppm.

**IR (neat):** ν = 2935, 2115, 1652, 1164, 1126 cm<sup>-1</sup>

Compound **3h** (*E*)-*N*-(3-azido-4,4,4-trifluorobut-1-en-1-yl)-*N*-benzylmethanesulfonamide

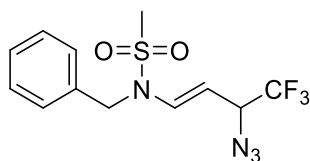

C<sub>12</sub>H<sub>13</sub>F<sub>3</sub>N<sub>4</sub>O<sub>2</sub>S  
MW: 334.07 g.mol<sup>-1</sup>  
Colorless oil  
89%

**<sup>1</sup>H NMR (300 MHz, CDCl<sub>3</sub>):** δ = 7.43–7.23 (m, 5H), 7.11 (dd, *J* = 14.1, 0.7 Hz, 1H), 4.88–4.65 (m, 3H), 4.22 (dq, *J* = 8.8, 6.5, 0.7 Hz, 1H), 2.96 (s, 3H) ppm.

**<sup>13</sup>C NMR (126 MHz, CDCl<sub>3</sub>):** δ = 134.6, 134.0, 129.1, 128.2, 127.0, 123.6 (q, *J* = 280.9 Hz), 97.7 (q, *J* = 1.9 Hz), 62.7 (q, *J* = 32.1 Hz), 49.5, 40.5 ppm.

**<sup>19</sup>F NMR (282 MHz, CDCl<sub>3</sub>):** δ = -75.76 ppm.

**HRMS (ESI-TOF) m/z:** [M+Na]<sup>+</sup> calcd for C<sub>12</sub>H<sub>13</sub>F<sub>3</sub>N<sub>4</sub>NaO<sub>2</sub>S 357.0609; Found 357.0615.

**IR (neat):** ν = 2114, 1657, 1342, 1262, 1159, 1124 cm<sup>-1</sup>

Compound **3i** (*E*)-*N*-(3-azido-4,4-difluorobut-1-en-1-yl)-*N*-benzyl-4-methylbenzenesulfonamide

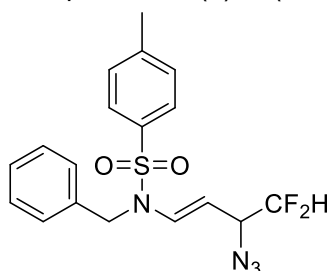

C<sub>18</sub>H<sub>18</sub>F<sub>2</sub>N<sub>4</sub>O<sub>2</sub>S  
MW: 392.42 g.mol<sup>-1</sup>  
Colorless oil  
92%

**<sup>1</sup>H NMR (300 MHz, CDCl<sub>3</sub>):** δ = 7.69 (d, *J* = 8.4 Hz, 2H), 7.38–7.17 (m, 8H), 5.72–5.23 (m, 1H), 4.65–4.47 (m, 3H), 4.11–3.93 (m, 1H), 2.44 (s, 3H) ppm.

**<sup>13</sup>C NMR (126 MHz, CDCl<sub>3</sub>):** δ = 144.7, 135.6, 134.2, 133.9, 130.2, 127.9, 127.2, 126.9, 114.2 (t, *J* = 246.4 Hz), 99.3 (t, *J* = 4.3 Hz), 63.3 (t, *J* = 24.4 Hz), 49.6, 21.7 ppm.

**<sup>19</sup>F NMR (282 MHz, CDCl<sub>3</sub>):** δ = -124.53 (d, *J* = 282.8 Hz), -126.69 (d, *J* = 282.8 Hz) ppm.

**HRMS (ESI-TOF) m/z:** [M+Na]<sup>+</sup> calcd for C<sub>18</sub>H<sub>18</sub>F<sub>2</sub>N<sub>4</sub>NaO<sub>2</sub>S 415.1011; Found 415.1008.

**IR (neat):** ν = 2110, 1654, 1363, 1166, 1069 cm<sup>-1</sup>

Compound **3j** (*E*)-*N*-(3-azidoprop-1-en-1-yl)-*N*-benzyl-4-methylbenzenesulfonamide

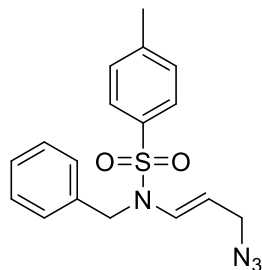

C<sub>17</sub>H<sub>18</sub>N<sub>4</sub>O<sub>2</sub>S  
MW: 342.42 g.mol<sup>-1</sup>  
Colorless oil  
90%

**<sup>1</sup>H NMR (400 MHz, CDCl<sub>3</sub>):** δ = 7.70 (d, *J* = 8.4 Hz, 2H), 7.35 – 7.20 (m, 7H), 7.03 (d, *J* = 14.1 Hz, 1H), 4.70 (dt, *J* = 14.3, 7.3 Hz, 1H), 4.52 (s, 2H), 3.66 – 3.60 (m, 2H), 2.43 (s, 3H) ppm.

**<sup>13</sup>C NMR (126 MHz, CDCl<sub>3</sub>):** δ = 144.4, 135.8, 134.8, 131.7, 130.1, 128.8, 127.8, 126.9, 103.7, 51.4, 49.6, 21.7 ppm.

Data match with those described in the literature<sup>11</sup>

Compound **4a** (*E*)-*N*-(1-azido-4,4,4-trifluorobut-1-en-1-yl)-*N*-benzyl-4-methylbenzenesulfonamide

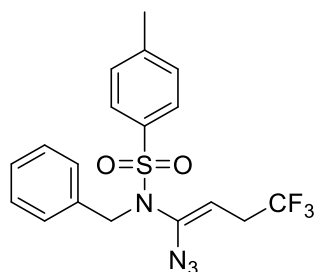

C<sub>18</sub>H<sub>17</sub>F<sub>3</sub>N<sub>4</sub>O<sub>2</sub>S  
MW: 410.42 g.mol<sup>-1</sup>  
White solid  
mp = 49 - 51 °C  
78%

**<sup>1</sup>H NMR (300 MHz, CDCl<sub>3</sub>):** δ = 7.76 (d, *J* = 8.3 Hz, 2H), 7.42 – 7.25 (m, 7H), 4.40 (s, 2H), 4.19 (t, *J* = 7.4 Hz, 1H), 2.75 (qd, *J* = 10.6, 7.4 Hz, 2H), 2.48 (s, 3H) ppm.

**<sup>13</sup>C NMR (126 MHz, CDCl<sub>3</sub>):** δ = 145.0, 137.7, 134.2, 133.6, 129.9, 129.4, 128.9, 128.9, 128.4, 125.5 (q, *J* = 277.0 Hz), 105.4 (q, *J* = 3.7 Hz), 55.9, 31.7 (q, *J* = 30.9 Hz), 21.8 ppm.

**<sup>19</sup>F NMR (282 MHz, CDCl<sub>3</sub>):** δ = -65.78 ppm.

**HRMS (ESI-TOF) m/z:** [M+Na]<sup>+</sup> calcd for C<sub>18</sub>H<sub>17</sub>F<sub>3</sub>N<sub>4</sub>NaO<sub>2</sub>S 433.0917; Found 433.0935.

**IR (neat):** ν = 2130, 1660, 1370, 1170, 1082 cm<sup>-1</sup>

<sup>11</sup> Y. Liu, N. Ding, X. Tan, X. Li, Z. Zhao, *Chem. Commun.* 2020, **56**, 7507–7510.

Compound **4b** (*E*)-*N*-(1-azido-4,4,4-trifluorobut-1-en-1-yl)-*N*-(4-fluorobenzyl)-4-methylbenzenesulfonamide

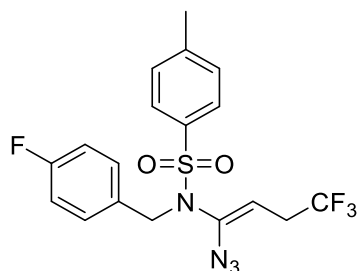

$C_{18}H_{16}F_4N_4O_2S$   
MW: 428.41 g.mol<sup>-1</sup>  
White solid  
68%

**<sup>1</sup>H NMR (500 MHz, CDCl<sub>3</sub>):** δ = 7.75 (d, *J* = 8.3 Hz, 2H), 7.37 (d, *J* = 7.8 Hz, 2H), 7.29 – 7.21 (m, 2H), 7.08 – 6.99 (m, 2H), 4.38 (s, 2H), 4.19 (t, *J* = 7.4 Hz, 1H), 2.77 (qd, *J* = 10.6, 7.4 Hz, 2H), 2.48 (s, 3H) ppm.

**<sup>13</sup>C NMR (126 MHz, CDCl<sub>3</sub>)** δ = 163.1 (d, *J* = 248.0 Hz), 145.1, 137.7, 133.6, 131.2 (d, *J* = 8.4 Hz), 130.1 (d, *J* = 3.3 Hz), 130.0, 128.4, 125.4 (q, *J* = 277.1 Hz), 116.0 (d, *J* = 21.7 Hz), 105.6 (q, *J* = 3.4 Hz), 55.2, 31.7 (q, *J* = 30.7 Hz), 21.8 ppm.

**<sup>19</sup>F NMR (282 MHz, CDCl<sub>3</sub>):** δ = -65.78, -112.83 ppm.

**HRMS (ESI-TOF) m/z:** [M+Na]<sup>+</sup> calcd for C<sub>18</sub>H<sub>16</sub>F<sub>4</sub>N<sub>4</sub>NaO<sub>2</sub>S 451.0828; Found 451.0841.

**IR (neat):** ν = 2360, 2131, 1510, 1358, 1251, 1065 cm<sup>-1</sup>

Compound **4c** (*E*)-*N*-(1-azido-4,4,4-trifluorobut-1-en-1-yl)-*N*-(benzo[d][1,3]dioxol-5-ylmethyl)-4-methylbenzenesulfonamide

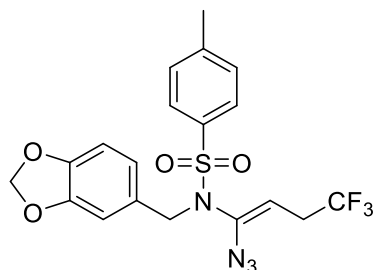

$C_{19}H_{17}F_3N_4O_4S$   
MW: 454.42 g.mol<sup>-1</sup>  
White solid  
81%

**<sup>1</sup>H NMR (300 MHz, CDCl<sub>3</sub>):** δ = 7.74 (d, *J* = 8.3 Hz, 2H), 7.36 (d, *J* = 7.9 Hz, 2H), 6.83 – 6.62 (m, 3H), 5.97 (s, 2H), 4.31 (s, 2H), 4.18 (t, *J* = 7.4 Hz, 1H), 2.78 (qd, *J* = 10.6, 7.4 Hz, 2H), 2.47 (s, 3H) ppm.

**<sup>13</sup>C NMR (126 MHz, CDCl<sub>3</sub>):** δ = 148.2, 148.1, 144.9, 137.7, 133.7, 129.9, 128.4, 127.8, 125.5 (q, *J* = 277.0 Hz), 123.2, 109.6, 108.5, 105.5 (q, *J* = 3.6 Hz), 101.4, 55.8, 31.7 (q, *J* = 30.9 Hz), 21.8 ppm.

**<sup>19</sup>F NMR (282 MHz, CDCl<sub>3</sub>):** δ = -65.76 ppm.

**HRMS (ESI-TOF) m/z:** [M+Na]<sup>+</sup> calcd for C<sub>19</sub>H<sub>17</sub>F<sub>3</sub>N<sub>4</sub>NaO<sub>4</sub>S 477.0815; Found 477.0801.

**IR (neat):** ν = 2907, 2132, 1661, 1348, 1244, 1036 cm<sup>-1</sup>

Compound **4d** (*E*)-*N*-(1-azido-4,4,4-trifluorobut-1-en-1-yl)-4-methyl-*N*-(pyridin-3-ylmethyl)benzenesulfonamide

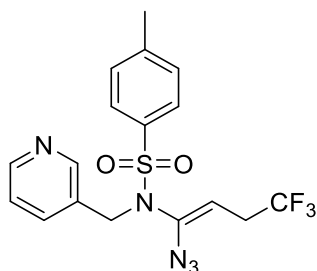

$C_{17}H_{16}F_3N_5O_2S$   
MW: 411.40 g.mol<sup>-1</sup>  
Colorless oil  
62%

**<sup>1</sup>H NMR (500 MHz, CDCl<sub>3</sub>):** δ = 8.61 (d, *J* = 3.9 Hz, 1H), 8.42 (s, 1H), 7.80 – 7.70 (m, 3H), 7.38 (d, *J* = 7.9 Hz, 2H), 7.36 – 7.32 (m, 1H), 4.43 (s, 2H), 4.23 (t, *J* = 7.4 Hz, 1H), 2.77 (qd, *J* = 10.6, 7.4 Hz, 2H), 2.48 (s, 3H) ppm.

**<sup>13</sup>C NMR (126 MHz, CDCl<sub>3</sub>):** δ = 150.2, 150.0, 145.2, 137.4, 137.0, 133.1, 130.1, 129.9, 128.3, 125.2 (q, *J* = 277.1 Hz), 123.9, 105.9 (q, *J* = 3.7 Hz), 53.1, 31.6 (q, *J* = 31.0 Hz), 21.7 ppm.

**<sup>19</sup>F NMR (471 MHz, CDCl<sub>3</sub>):** δ = -65.76 ppm.

**HRMS (ESI-TOF) m/z:** [M+H]<sup>+</sup> calcd for C<sub>17</sub>H<sub>17</sub>F<sub>3</sub>N<sub>5</sub>O<sub>2</sub>S 412.1050; Found 412.1043.

**IR (neat):** ν = 2127, 1660, 1595, 1428, 1249, 1163, 1055 cm<sup>-1</sup>

Compound **4e** (*E*)-*N*-(1-azido-4,4,4-trifluorobut-1-en-1-yl)-*N*,4-dimethylbenzenesulfonamide

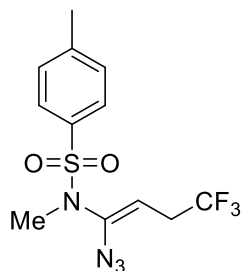

$C_{12}H_{13}F_3N_4O_2S$   
MW: 334.32 g.mol<sup>-1</sup>  
Colorless oil  
61%

**<sup>1</sup>H NMR (500 MHz, CDCl<sub>3</sub>):** δ = 7.70 (d, *J* = 8.3 Hz, 2H), 7.35 (d, *J* = 7.9 Hz, 2H), 4.10 (t, *J* = 7.4 Hz, 1H), 3.02 (s, 3H), 2.84 (qd, *J* = 10.6, 7.4 Hz, 2H), 2.46 (s, 3H) ppm.

**<sup>13</sup>C NMR (126 MHz, CDCl<sub>3</sub>):** δ = 145.0, 140.0, 131.9, 129.8, 128.7, 125.5 (q, *J* = 276.8 Hz), 103.3 (q, *J* = 3.8 Hz), 39.4, 31.7 (q, *J* = 31.0 Hz), 21.8 ppm.

**<sup>19</sup>F NMR (471 MHz, CDCl<sub>3</sub>):** δ = -65.87 ppm.

**HRMS (ESI-TOF) m/z:** [M+Na]<sup>+</sup> calcd C<sub>12</sub>H<sub>13</sub>F<sub>3</sub>N<sub>4</sub>NaO<sub>2</sub>S 357.0603; Found 357.0602.

**IR (neat):** ν = 2981, 2122, 1660, 1356, 1250, 1138, 1062 cm<sup>-1</sup>

Compound **4f** (*E*)-*N*-(1-azido-4,4,4-trifluorobut-1-en-1-yl)-*N*-cyclopropyl-4-methylbenzenesulfonamide

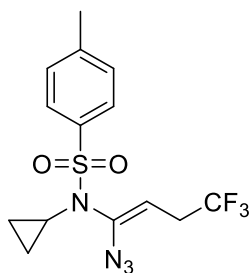

$C_{14}H_{15}F_3N_4O_2S$   
MW: 360.36 g.mol<sup>-1</sup>  
Colorless oil  
67%

**<sup>1</sup>H NMR (500 MHz, CDCl<sub>3</sub>):**  $\delta$  = 7.77 (d, *J* = 8.3 Hz, 2H), 7.35 (d, *J* = 8.0 Hz, 2H), 4.24 (t, *J* = 7.4 Hz, 1H), 2.87 (qd, *J* = 10.6, 7.4 Hz, 2H), 2.46 (s, 3H), 2.46 – 2.39 (m, 1H), 0.90 – 0.77 (m, 4H) ppm.

**<sup>13</sup>C NMR (126 MHz, CDCl<sub>3</sub>):**  $\delta$  = 145.0, 139.5, 133.0, 129.8, 128.8, 125.6 (d, *J* = 276.9 Hz), 104.2 (q, *J* = 3.7 Hz), 32.6, 31.8 (q, *J* = 30.9 Hz), 21.8, 8.1 ppm.

**<sup>19</sup>F NMR (471 MHz, CDCl<sub>3</sub>):**  $\delta$  = -65.95 ppm.

**HRMS (ESI-TOF) m/z:** [M+Na]<sup>+</sup> calcd C<sub>14</sub>H<sub>15</sub>F<sub>3</sub>N<sub>4</sub>NaO<sub>2</sub>S 383.0760; Found 383.0765.

**IR (neat):**  $\nu$  = 2123, 1662, 1363, 1250, 1139, 1064 cm<sup>-1</sup>

Compound **4g** (*E*)-*N*-(1-azido-4,4,4-trifluorobut-1-en-1-yl)-*N*-(4-cyanobutyl)-4-methylbenzenesulfonamide

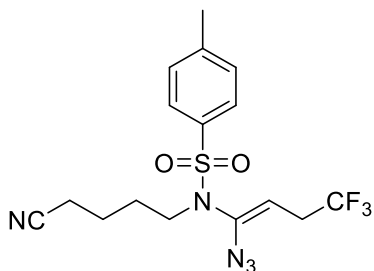

$C_{16}H_{18}F_3N_5O_2S$   
MW: 401.41 g.mol<sup>-1</sup>  
Colorless oil  
59%

**<sup>1</sup>H NMR (400 MHz, CDCl<sub>3</sub>):**  $\delta$  = 7.69 (d, *J* = 8.4 Hz, 2H), 7.35 (d, *J* = 8.0 Hz, 2H), 4.19 (t, *J* = 7.4 Hz, 1H), 3.35 (td, *J* = 5.8, 1.1 Hz, 2H), 2.88 (qd, *J* = 10.6, 7.4 Hz, 2H), 2.46 (s, 3H), 2.45 – 2.41 (m, 2H), 1.76 (dq, *J* = 4.1, 2.8 Hz, 4H) ppm.

**<sup>13</sup>C NMR (126 MHz, CDCl<sub>3</sub>):**  $\delta$  = 145.1, 138.0, 133.1, 129.9, 128.4, 125.4 (q, *J* = 277.0 Hz), 119.1, 105.5 (q, *J* = 3.4 Hz), 50.9, 31.9 (q, *J* = 31.0 Hz), 27.2, 22.3, 21.8, 16.8 ppm.

**<sup>19</sup>F NMR (471 MHz, CDCl<sub>3</sub>):**  $\delta$  = -65.74 ppm.

**HRMS (ESI-TOF) m/z:** [M+Na]<sup>+</sup> calcd C<sub>16</sub>H<sub>18</sub>F<sub>3</sub>N<sub>5</sub>NaO<sub>2</sub>S 424.1025; Found 424.1018.

**IR (neat):**  $\nu$  = 2941, 2126, 1660, 1353, 1249, 1135, 1060 cm<sup>-1</sup>

Compound **4h** (*E*)-*N*-(1-azido-4,4,4-trifluorobut-1-en-1-yl)-*N*-benzylmethanesulfonamide

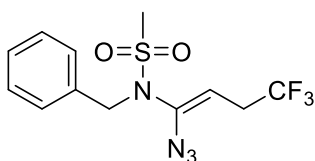

$C_{12}H_{13}F_3N_4O_2S$   
MW: 334.07 g.mol<sup>-1</sup>  
Colorless oil  
80%

**<sup>1</sup>H NMR (300 MHz, CDCl<sub>3</sub>):** δ = 7.47 – 7.28 (m, 5H), 4.82 (t, *J* = 7.3 Hz, 1H), 4.59 (s, 2H), 3.01 (s, 3H), 2.89 (qd, *J* = 10.6, 7.3 Hz, 2H) ppm.

**<sup>13</sup>C NMR (126 MHz, CDCl<sub>3</sub>):** δ = 137.7, 134.2, 129.5, 129.1, 129.1, 125.5 (q, *J* = 276.9 Hz), 106.1 (q, *J* = 3.7 Hz), 55.5, 38.2, 32.0 (q, *J* = 31.0 Hz) ppm.

**<sup>19</sup>F NMR (282 MHz, CDCl<sub>3</sub>):** δ = -65.87 ppm.

**HRMS (ESI-TOF) m/z:** [M+Na]<sup>+</sup> calcd C<sub>12</sub>H<sub>13</sub>F<sub>3</sub>N<sub>4</sub>NaO<sub>2</sub>S 357.0604; Found 357.0610.

**IR (neat):** ν = 2133, 1662, 1349, 1251, 1143, 1065 cm<sup>-1</sup>

Compound 4i (*E*)-*N*-(1-azido-4,4-difluorobut-1-en-1-yl)-*N*-benzyl-4-methylbenzenesulfonamide

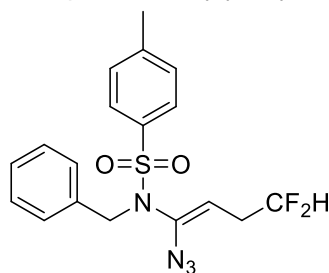

C<sub>18</sub>H<sub>18</sub>F<sub>2</sub>N<sub>4</sub>O<sub>2</sub>S  
MW: 392.42 g.mol<sup>-1</sup>  
White solid  
32%

**<sup>1</sup>H NMR (400 MHz, CDCl<sub>3</sub>):** δ = 7.76 (d, *J* = 8.0 Hz, 2H), 7.40 – 7.27 (m, 7H), 5.79 – 5.40 (m, 1H), 4.40 (s, 2H), 4.25 (t, *J* = 7.5 Hz, 1H), 2.58 – 2.36 (m, 5H) ppm.

**<sup>13</sup>C NMR (126 MHz, CDCl<sub>3</sub>):** δ = 144.9, 136.4, 134.3, 133.7, 129.9, 129.5, 128.9, 128.8, 128.4, 115.1 (t, *J* = 241.1 Hz), 107.7 (t, *J* = 6.5 Hz), 55.9, 31.8 (t, *J* = 22.5 Hz), 21.8 ppm.

**<sup>19</sup>F NMR (282 MHz, CDCl<sub>3</sub>):** δ = -115.54 ppm.

**HRMS (ESI-TOF) m/z:** [M+Na]<sup>+</sup> calcd for C<sub>18</sub>H<sub>18</sub>F<sub>2</sub>N<sub>4</sub>NaO<sub>2</sub>S 415.1011; Found 415.1008.

**IR (neat):** ν = 2126, 168, 1353, 1165, 1049 cm<sup>-1</sup>

Compound 5a *N*-benzyl-*N*-(4,4-difluorobut-3-en-1-yn-1-yl)-4-methylbenzenesulfonamide

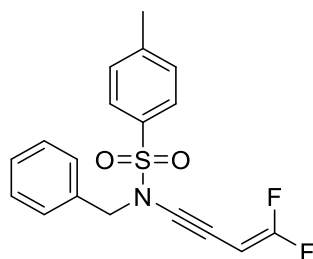

C<sub>18</sub>H<sub>15</sub>F<sub>2</sub>NO<sub>2</sub>S  
MW: 347.38 g.mol<sup>-1</sup>  
Colorless oil  
79%

**<sup>1</sup>H NMR (500 MHz, CDCl<sub>3</sub>):** δ = 7.92 – 7.65 (d, 2H, *J* = 8.3 Hz, 2H), 7.45 – 7.10 (m, 7H), 4.57 (dd, *J* = 22.8, 1.1 Hz, 1H), 4.50 (s, 2H), 2.44 (s, 3H).

Data match with those described in the literature<sup>6</sup>

Compound 5b *N*-benzyl-*N*-(4,4-difluorobut-3-en-1-yn-1-yl)-4-methanesulfonamide

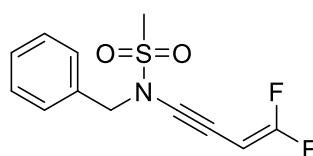

C<sub>12</sub>H<sub>11</sub>F<sub>2</sub>NO<sub>2</sub>S  
MW: 271.28 g.mol<sup>-1</sup>  
Colorless oil  
75%

**<sup>1</sup>H NMR (500 MHz, CDCl<sub>3</sub>):** 7.60 – 7.32 (m, 5H), 4.72 – 4.63 (m, 1H), 4.64 (s, 2H), 2.87 (s, 3H) ppm.

Data match with those described in the literature<sup>6</sup>

Compound **5c** 2-(4,4-difluorobut-3-en-1-yn-1-yl)-2,3-dihydrobenzo[d]isothiazole 1,1-dioxide

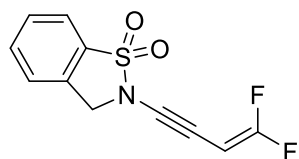

C<sub>11</sub>H<sub>7</sub>F<sub>2</sub>NO<sub>2</sub>S  
MW: 255.24 g.mol<sup>-1</sup>  
Colorless oil  
52%

**<sup>1</sup>H NMR (500 MHz, CDCl<sub>3</sub>):** 7.88 – 7.79 (m, 1H), 7.69 (td, *J* = 7.6, 1.2 Hz, 1H), 7.64 – 7.56 (m, 1H), 7.42 (dp, *J* = 7.9, 0.9 Hz, 1H), 4.81 (s, 2H), 4.77 (dd, *J* = 22.6, 1.2 Hz, 1H).

Data match with those described in the literature<sup>6</sup>

Compound **6a** *N*-(4-azido-4,4-difluorobut-1-yn-1-yl)-*N*-benzyl-4-methylbenzenesulfonamide

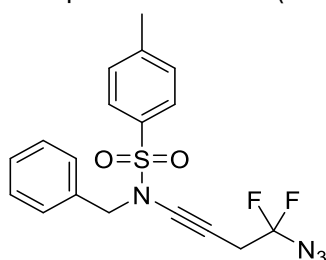

C<sub>18</sub>H<sub>16</sub>F<sub>2</sub>N<sub>4</sub>O<sub>2</sub>S  
MW: 390.40 g.mol<sup>-1</sup>  
Colorless oil  
52%

**<sup>1</sup>H NMR (400 MHz, CDCl<sub>3</sub>):** δ = 7.75 (d, *J* = 8.4 Hz, 2H), 7.33 – 7.27 (m, 7H), 4.47 (s, 2H), 2.92 (t, *J* = 10.9 Hz, 2H), 2.45 (s, 3H) ppm.

**<sup>13</sup>C NMR (126 MHz, CDCl<sub>3</sub>):** δ = 144.9, 134.7, 134.4, 129.8, 128.9, 128.6, 128.5, 127.9, 121.4 (d, *J* = 267.0 Hz), 76.9, 61.2 (t, *J* = 6.3 Hz), 55.5, 28.2 (d, *J* = 33.2 Hz), 21.8 ppm.

**<sup>19</sup>F NMR (471 MHz, CDCl<sub>3</sub>):** δ = -74.00 ppm.

**HRMS (ESI-TOF) *m/z*:** [M+Na]<sup>+</sup> calcd for C<sub>18</sub>H<sub>16</sub>F<sub>2</sub>N<sub>4</sub>NaO<sub>2</sub>S 413.0854; Found 413.0856.

**IR (neat):** ν = 2930, 2361, 2148, 1366, 1168, 1060 cm<sup>-1</sup>

Compound **6b** *N*-(4-azido-4,4-difluorobut-1-yn-1-yl)-*N*-benzylmethanesulfonamide

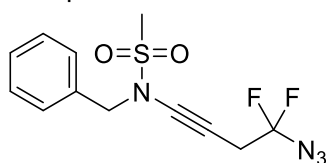

C<sub>12</sub>H<sub>12</sub>F<sub>2</sub>N<sub>4</sub>O<sub>2</sub>S  
MW: 314.31 g.mol<sup>-1</sup>  
Colorless oil  
44%

**<sup>1</sup>H NMR (500 MHz, CDCl<sub>3</sub>):** δ = 7.47 – 7.32 (m, 5H), 4.61 (s, 2H), 3.01 (t, *J* = 10.9 Hz, 2H), 2.86 (s, 3H) ppm.

**<sup>13</sup>C NMR (126 MHz, CDCl<sub>3</sub>):** δ = 134.4, 129.1, 129.0, 129.0, 121.4 (t, *J* = 266.8 Hz), 77.0, 61.8 (t, *J* = 6.0 Hz), 55.7, 39.0, 28.2 (t, *J* = 32.7 Hz) ppm.

**<sup>19</sup>F NMR (471 MHz, CDCl<sub>3</sub>):** δ = -73.96 ppm.

**HRMS (ESI-TOF) *m/z*:** [M+Na]<sup>+</sup> calcd for C<sub>12</sub>H<sub>12</sub>F<sub>2</sub>N<sub>4</sub>NaO<sub>2</sub>S 337.0541; Found 337.0522.

**IR (neat):** ν = 2932, 2264, 2149, 1361, 1164, 1059 cm<sup>-1</sup>



Compound 6c 2-(4-azido-4,4-difluorobut-1-yn-1-yl)-2,3-dihydrobenzo[d]isothiazole 1,1-dioxide

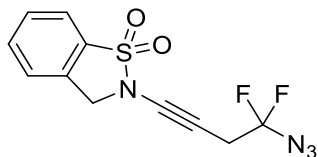

$C_{11}H_8F_2N_4O_2S$   
MW: 298.27 g.mol<sup>-1</sup>  
Colorless oil  
47%

**<sup>1</sup>H NMR (500 MHz, C<sub>6</sub>D<sub>6</sub>):** δ = 7.22 (dq, *J* = 7.8, 0.6 Hz, 1H), 6.73 (td, *J* = 7.6, 1.2 Hz, 1H), 6.64 (td, *J* = 7.6, 0.9 Hz, 1H), 6.15 (dt, *J* = 7.7, 0.9 Hz, 1H), 3.65 (s, 2H), 2.54 (t, *J* = 11.2 Hz, 2H) ppm.

**<sup>13</sup>C NMR (126 MHz, C<sub>6</sub>D<sub>6</sub>):** δ = 133.7, 132.6, 131.6, 129.3, 124.3, 121.8 (t, *J* = 265.8 Hz), 121.6, 73.9, 63.1 (t, *J* = 6.0 Hz), 51.7, 28.0 (t, *J* = 32.8 Hz) ppm.

**<sup>19</sup>F NMR (471 MHz, C<sub>6</sub>D<sub>6</sub>):** δ = -74.11 ppm.

**HRMS (ESI-TOF) m/z:** [M+Na]<sup>+</sup> calcd for C<sub>11</sub>H<sub>8</sub>F<sub>2</sub>N<sub>4</sub>NaO<sub>2</sub>S 321.0228; Found 321.0213.

**IR (neat):** ν = 2951, 2261, 2151, 1327, 1179, 1059 cm<sup>-1</sup>

Compound 7 (E)-N-benzyl-4-methyl-N-(4,4,4-trifluoro-3-oxobut-1-en-1-yl)benzenesulfonamide

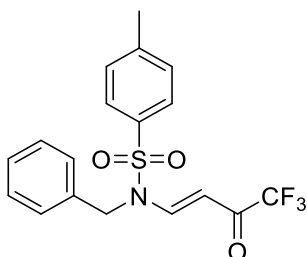

$C_{18}H_{16}F_3NO_3S$   
MW: 383.38 g.mol<sup>-1</sup>  
Colorless oil  
91%

**<sup>1</sup>H NMR (300 MHz, CDCl<sub>3</sub>):** δ = 8.5 (d, *J* = 13.7 Hz, 1H), 7.7 (d, *J* = 8.4 Hz, 2H), 7.4 – 7.3 (m, 2H), 7.2 – 7.1 (m, 5H), 5.57 (dq, *J* = 13.7, 0.8 Hz, 1H), 4.7 (s, 2H), 2.5 (s, 3H) ppm.

**<sup>13</sup>C NMR (126 MHz, CDCl<sub>3</sub>):** δ = 179.1 (q, *J* = 35.1 Hz), 147.1 (d, *J* = 1.4 Hz), 146.0, 134.6, 133.0, 130.6, 129.1, 128.4, 127.7, 126.9, 116.5 (q, *J* = 290.9 Hz), 98.5, 50.4, 21.8 ppm.

**<sup>19</sup>F NMR (282 MHz, CDCl<sub>3</sub>):** δ = -77.81 ppm.

**HRMS (ESI-TOF) m/z:** [M+Na]<sup>+</sup> calcd for C<sub>18</sub>H<sub>16</sub>F<sub>3</sub>NNaO<sub>3</sub>S 406.0695; Found 406.0686.

**IR (neat):** ν = 2939, 1579, 1170, 1022 cm<sup>-1</sup>

Compound 8 (E)-N-(benzo[d][1,3]dioxol-5-ylmethyl)-N-(2-cyano-4,4,4-trifluorobut-1-en-1-yl)-4-methylbenzenesulfonamide

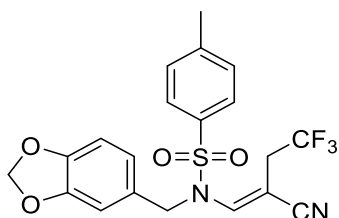

$C_{20}H_{17}F_3N_2O_4S$   
MW: 438.42 g.mol<sup>-1</sup>  
Colorless oil  
69%

**<sup>1</sup>H NMR (300 MHz, CDCl<sub>3</sub>):** δ = 7.68 (d, *J* = 8.4 Hz, 2H), 7.40 (d, *J* = 8.0 Hz, 2H), 7.03 (s, 1H), 6.74 (d, *J* = 8.0 Hz, 1H), 6.74 – 6.61 (m, 1H), 6.61 – 6.51 (m, 1H), 5.97 (s, 2H), 4.42 (s, 2H), 3.02 (qd, *J* = 9.8, 0.9 Hz, 2H), 2.48 (s, 3H) ppm.

**<sup>13</sup>C NMR (126 MHz, CDCl<sub>3</sub>):** δ = 148.7, 148.0, 145.8, 144.0, 134.2, 130.6, 127.7, 127.6, 124.3 (q, *J* = 278.0 Hz), 120.6, 118.4, 108.9, 107.4, 101.6, 94.6 (q, *J* = 3.6 Hz), 52.3, 33.6 (q, *J* = 31.5 Hz), 21.8 ppm.

**<sup>19</sup>F NMR (282 MHz, CDCl<sub>3</sub>):** δ = -64.71 ppm.

**HRMS (ESI-TOF) m/z:** [M+K]<sup>+</sup> calcd for C<sub>20</sub>H<sub>17</sub>F<sub>3</sub>KN<sub>2</sub>O<sub>4</sub>S 477.0493; Found 477.0504.

**IR (neat):** ν = 2905, 1626, 1361, 1247, 1168, 1039 cm<sup>-1</sup>

Compound 9 (*E*)-*N*-benzyl-4-methyl-*N*-(4,4,4-trifluoro-3-oxobut-1-en-1-yl)benzenesulfonamide

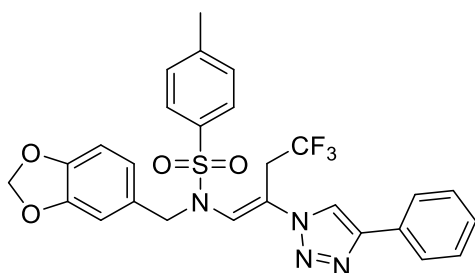

C<sub>27</sub>H<sub>23</sub>F<sub>3</sub>N<sub>4</sub>O<sub>4</sub>S  
MW: 556.56 g.mol<sup>-1</sup>  
White solid  
98%

**<sup>1</sup>H NMR (500 MHz, CDCl<sub>3</sub>):** δ = 7.86 – 7.79 (m, 2H), 7.73 (s, 1H), 7.70 (d, *J* = 8.4 Hz, 2H), 7.49 – 7.40 (m, 2H), 7.40 – 7.33 (m, 3H), 6.78 – 6.63 (m, 3H), 6.16 (s, 1H), 5.95 (s, 2H), 4.27 (s, 2H), 3.80 (q, *J* = 9.8 Hz, 2H), 2.46 (s, 3H) ppm.

**<sup>13</sup>C NMR (126 MHz, CDCl<sub>3</sub>):** δ = 148.3, 148.2, 148.0, 145.1, 134.0, 133.3 (q, *J* = 3.1 Hz), 130.4, 129.8, 129.1, 128.8, 127.8, 127.7, 127.0, 126.0, 124.1 (q, *J* = 279.0 Hz), 122.9, 118.8 (q, *J* = 1.4 Hz), 109.5, 108.5, 101.4, 55.5, 34.1 (q, *J* = 31.7 Hz), 21.8 ppm.

**<sup>19</sup>F NMR (282 MHz, CDCl<sub>3</sub>):** δ = -62.45 ppm.

**HRMS (ESI-TOF) m/z:** [M+H]<sup>+</sup> calcd for C<sub>27</sub>H<sub>24</sub>F<sub>3</sub>N<sub>4</sub>O<sub>4</sub>S 557.1465; Found 557.1459.

**IR (neat):** ν = 2360, 1489, 1350, 1244, 1164, 1039, 804 cm<sup>-1</sup>

Compound 10 ethyl (*E*)-3-amino-4-((*N*-benzyl-4-methylphenyl)sulfonamido)but-3-enoate

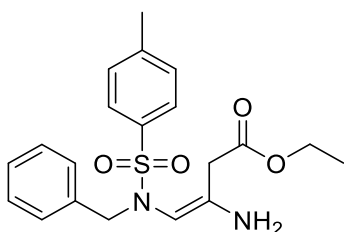

C<sub>20</sub>H<sub>24</sub>N<sub>2</sub>O<sub>4</sub>S  
MW: 388.48 g.mol<sup>-1</sup>  
Colorless oil  
87%

**<sup>1</sup>H NMR (500 MHz, CDCl<sub>3</sub>):** δ = 7.72 (d, *J* = 8.3 Hz, 2H), 7.33 (d, *J* = 7.9 Hz, 2H), 7.28 – 7.26 (m, 3H), 7.19 – 7.12 (m, 2H), 4.40 (s, 2H), 4.31 (s, 1H), 4.09 (d, *J* = 7.1 Hz, 2H), 3.67 (s, 2H), 2.45 (s, 3H), 1.25 (t, *J* = 7.1 Hz, 3H) ppm.

**<sup>13</sup>C NMR (126 MHz, CDCl<sub>3</sub>):** δ = 169.6, 156.4, 144.1, 136.5, 135.1, 130.1, 128.9, 128.7, 128.2, 127.3, 85.0, 58.9, 51.7, 50.6, 21.7, 14.6 ppm.

**HRMS (ESI-TOF) m/z:** [M+Na]<sup>+</sup> calcd for C<sub>20</sub>H<sub>24</sub>N<sub>2</sub>NaO<sub>4</sub>S 411.1349; Found 411.1346.

**IR (neat):** ν = 3462, 3340, 2978, 1668, 1619, 1562, 1278, 1154, 1091 cm<sup>-1</sup>

NMR spectra

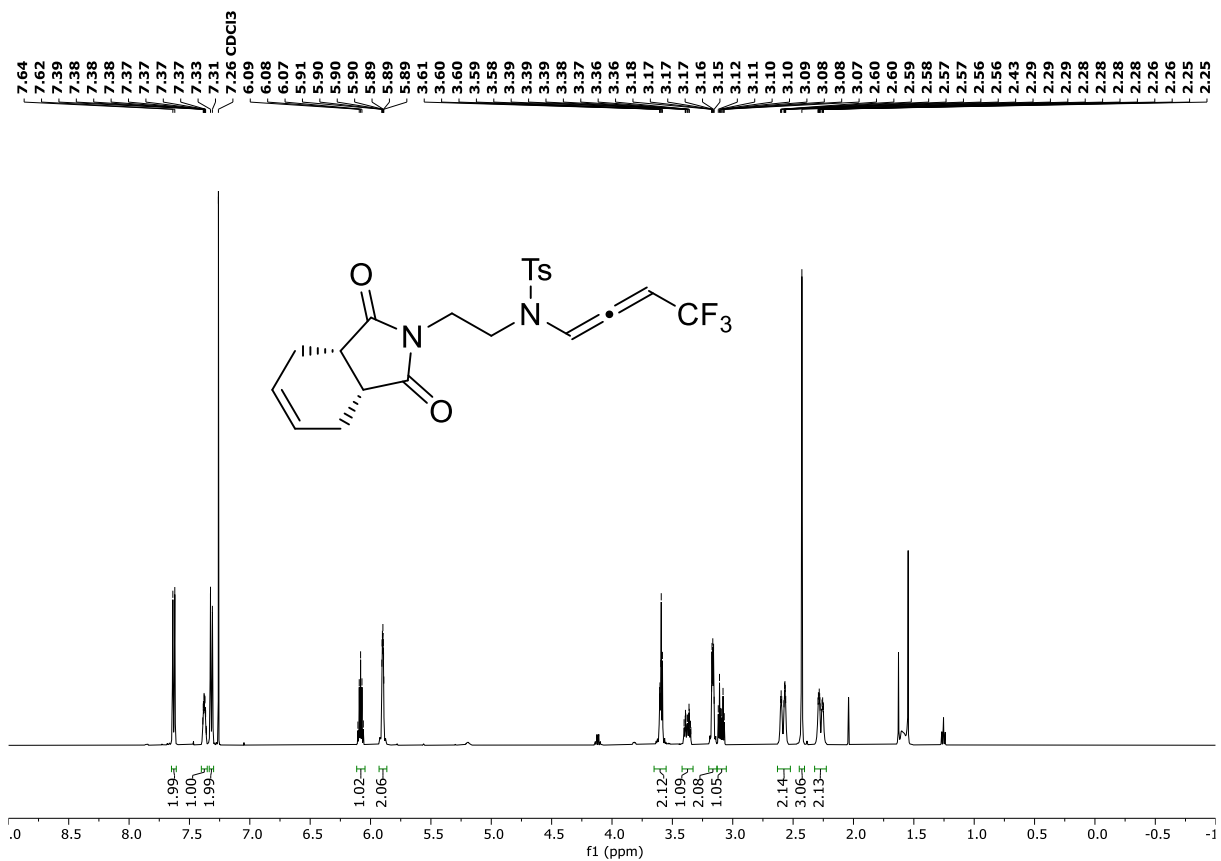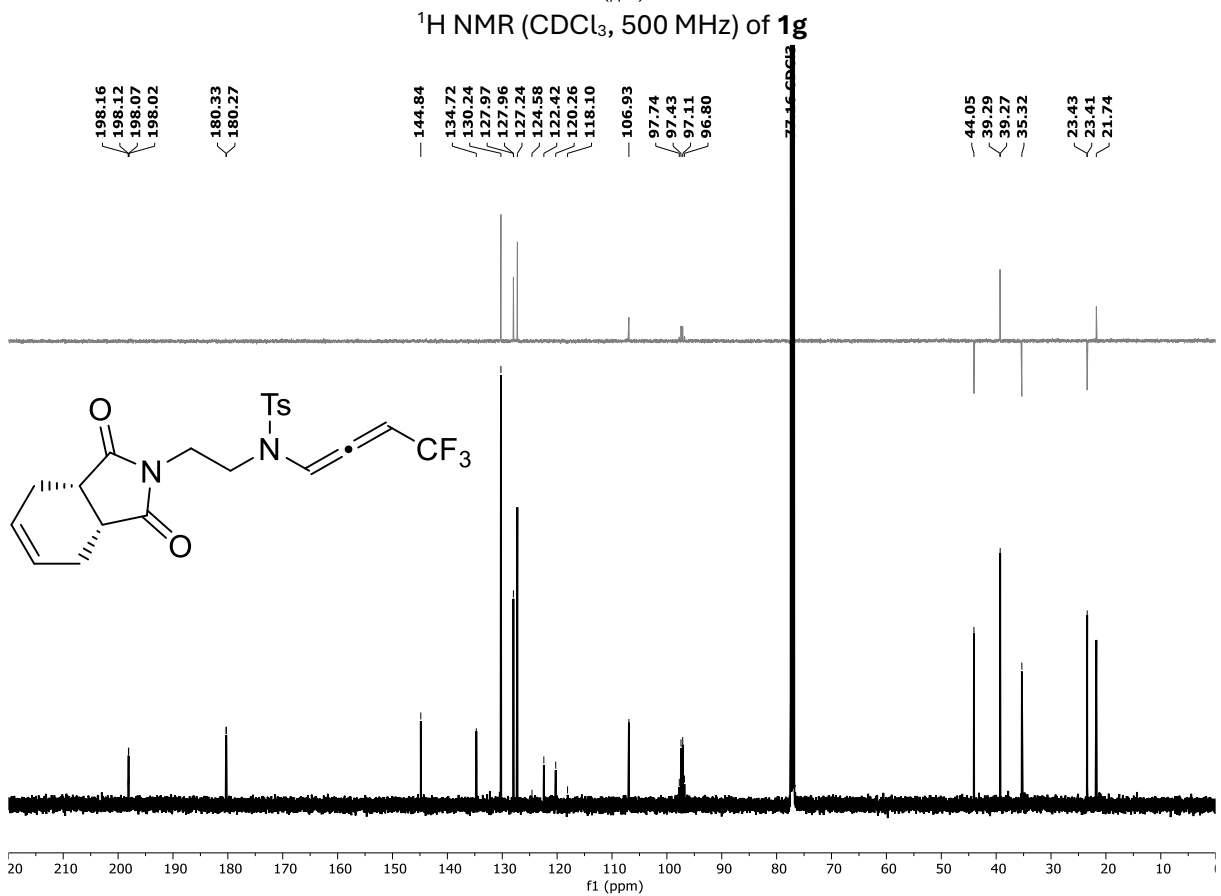

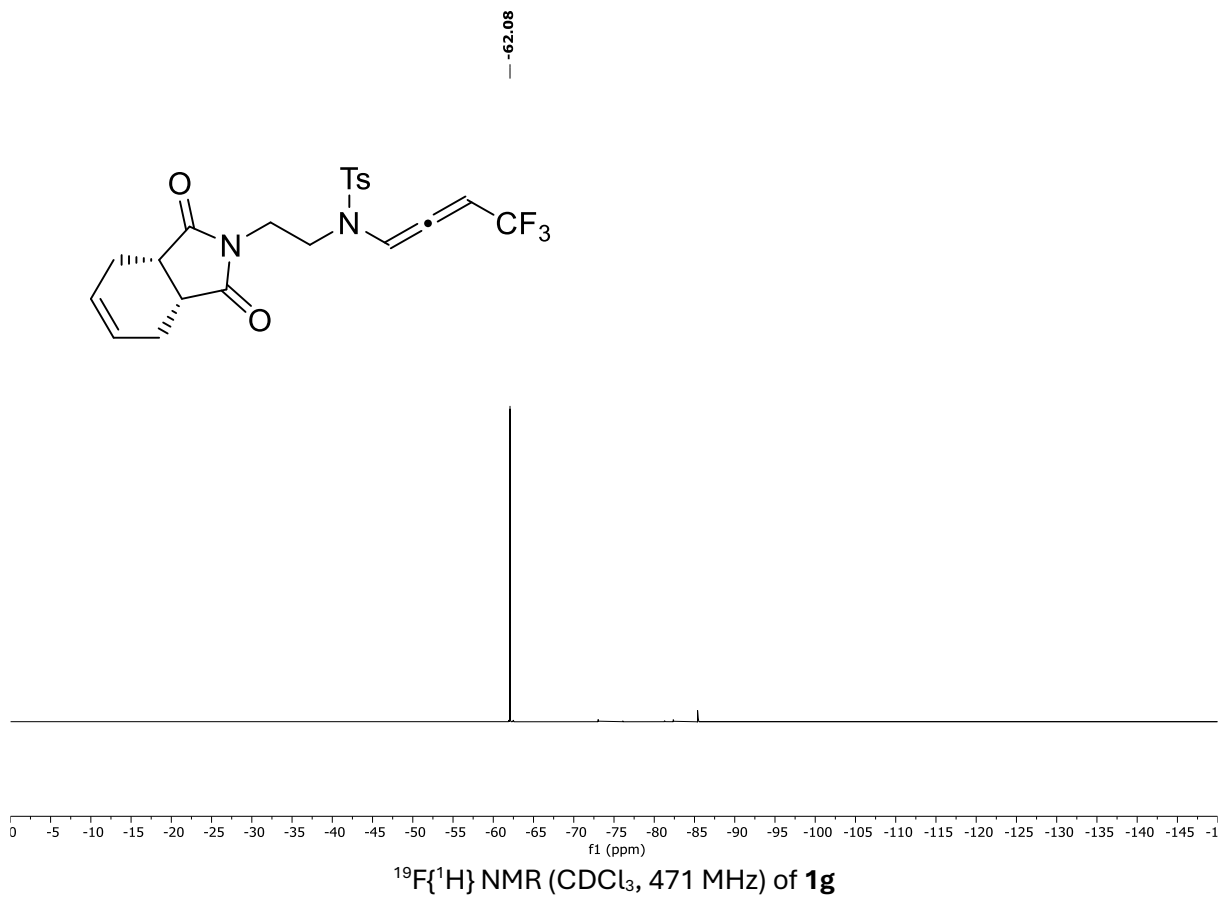

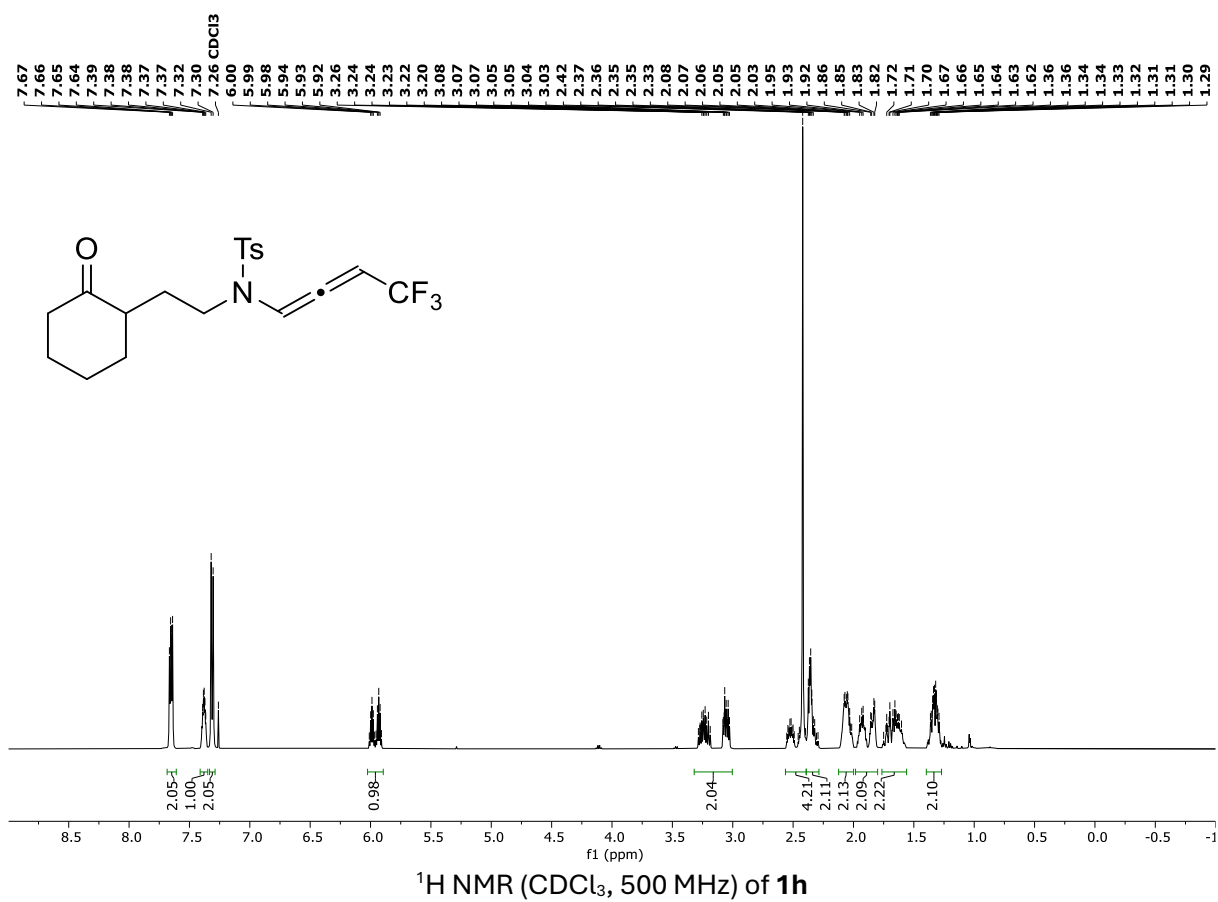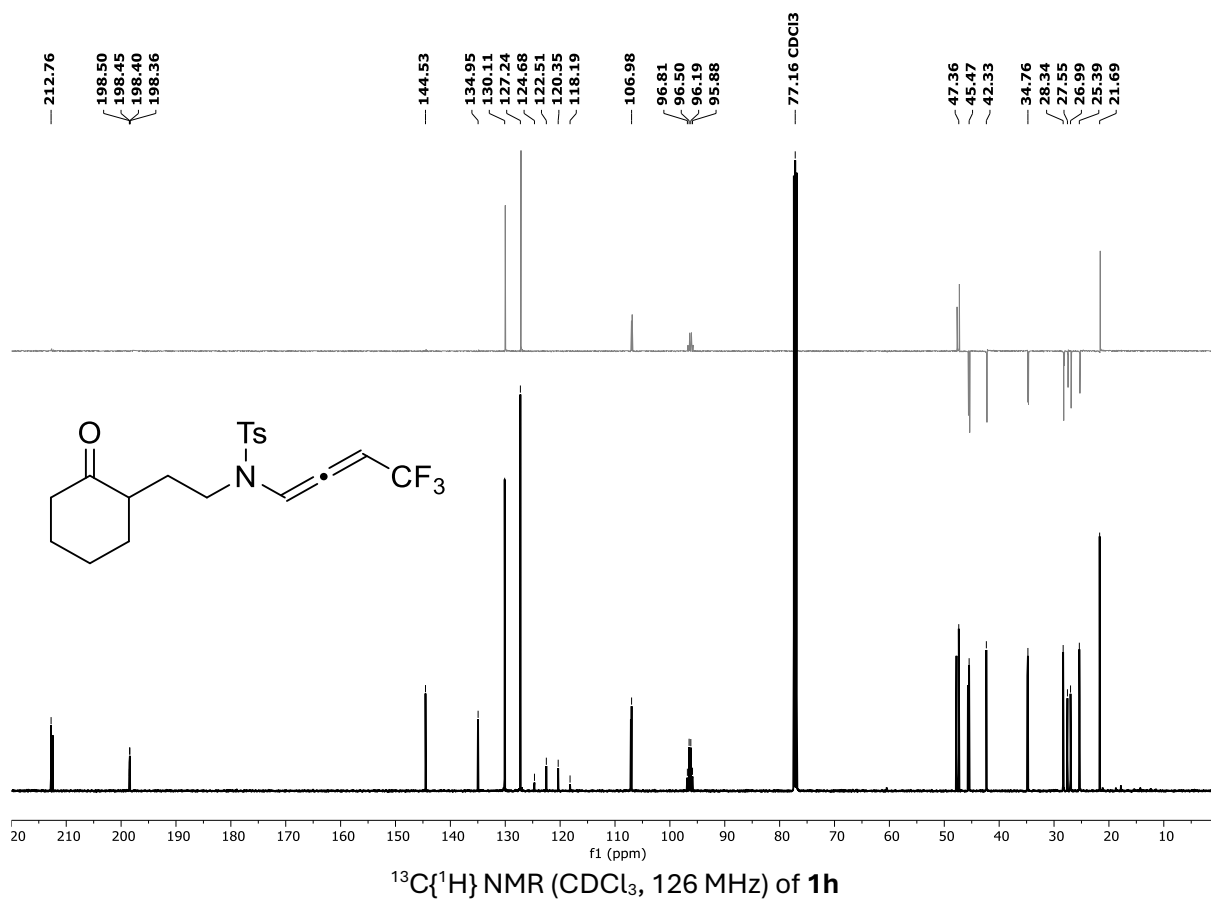

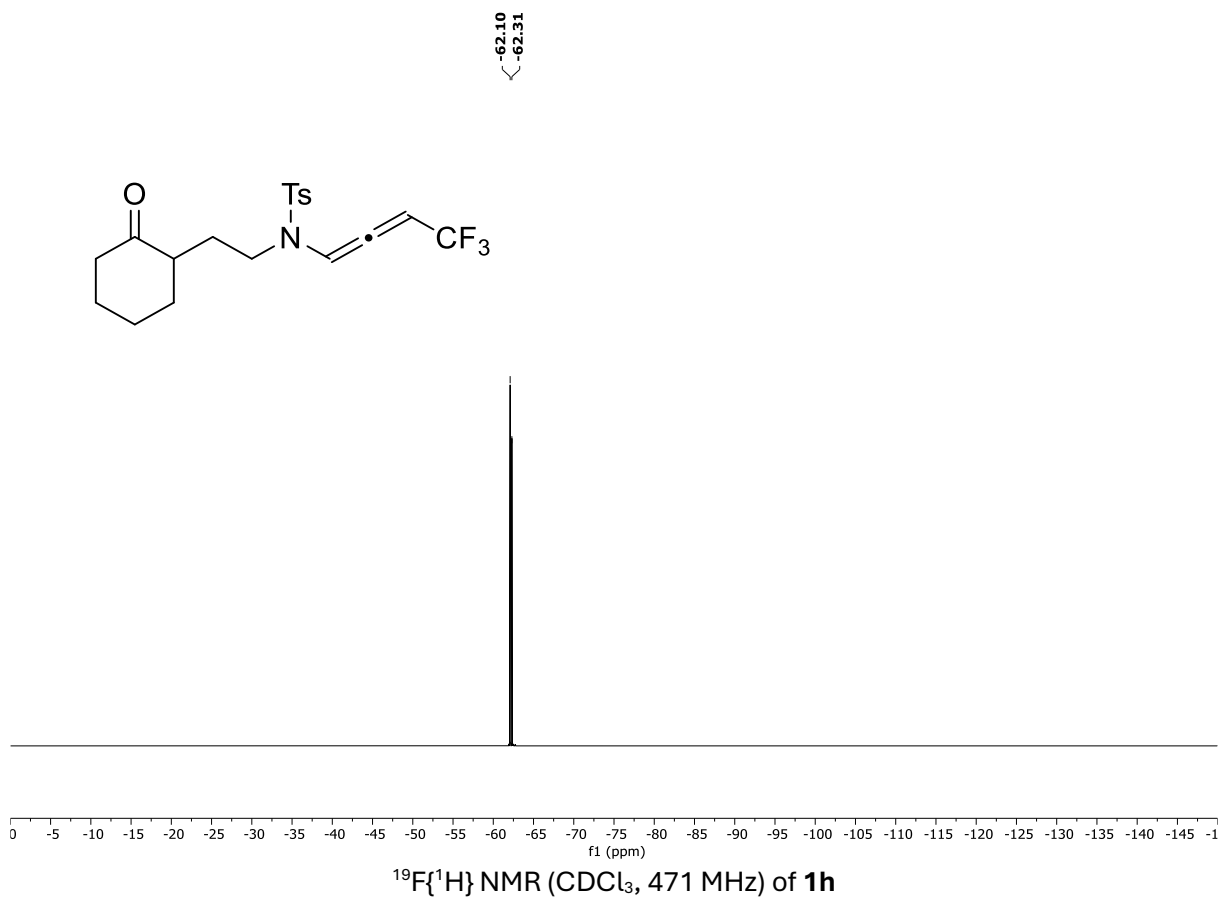

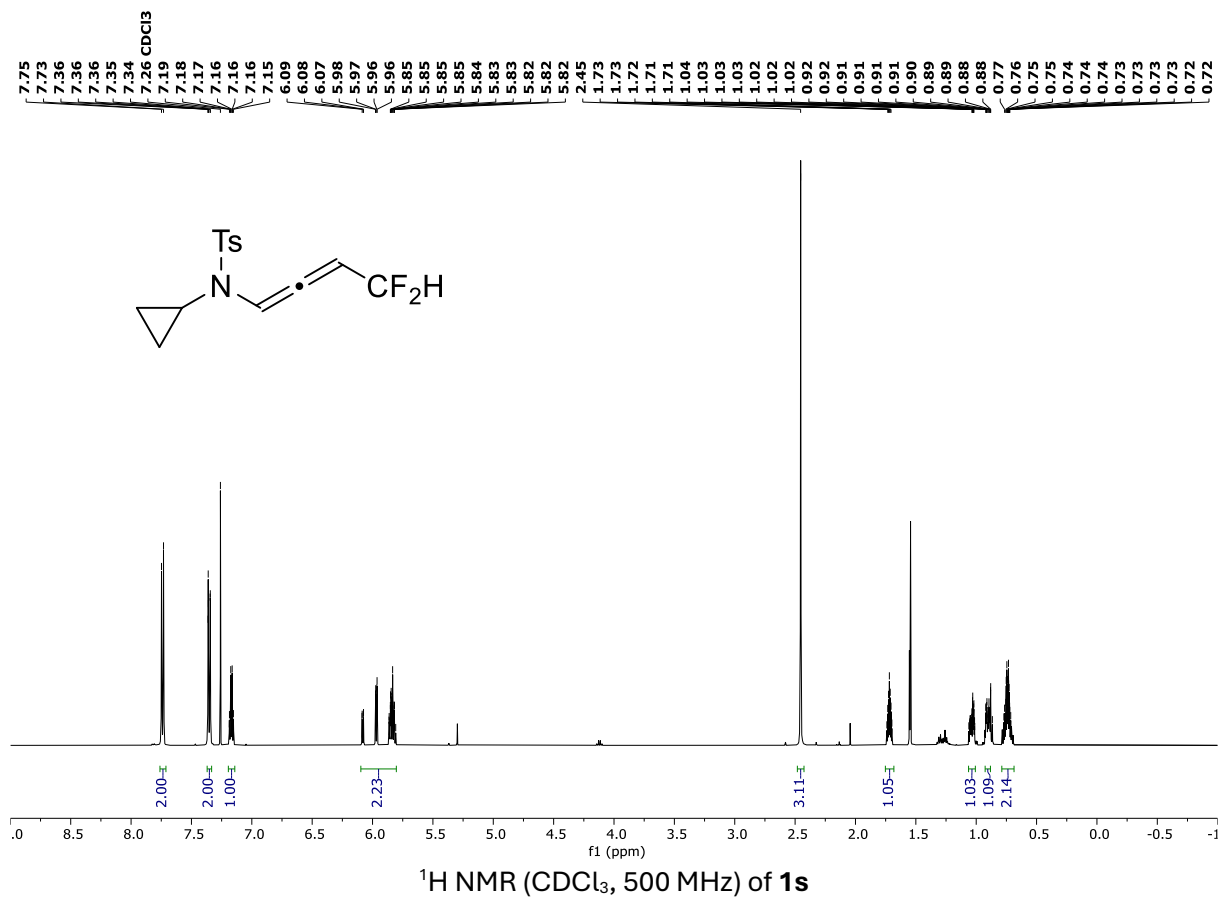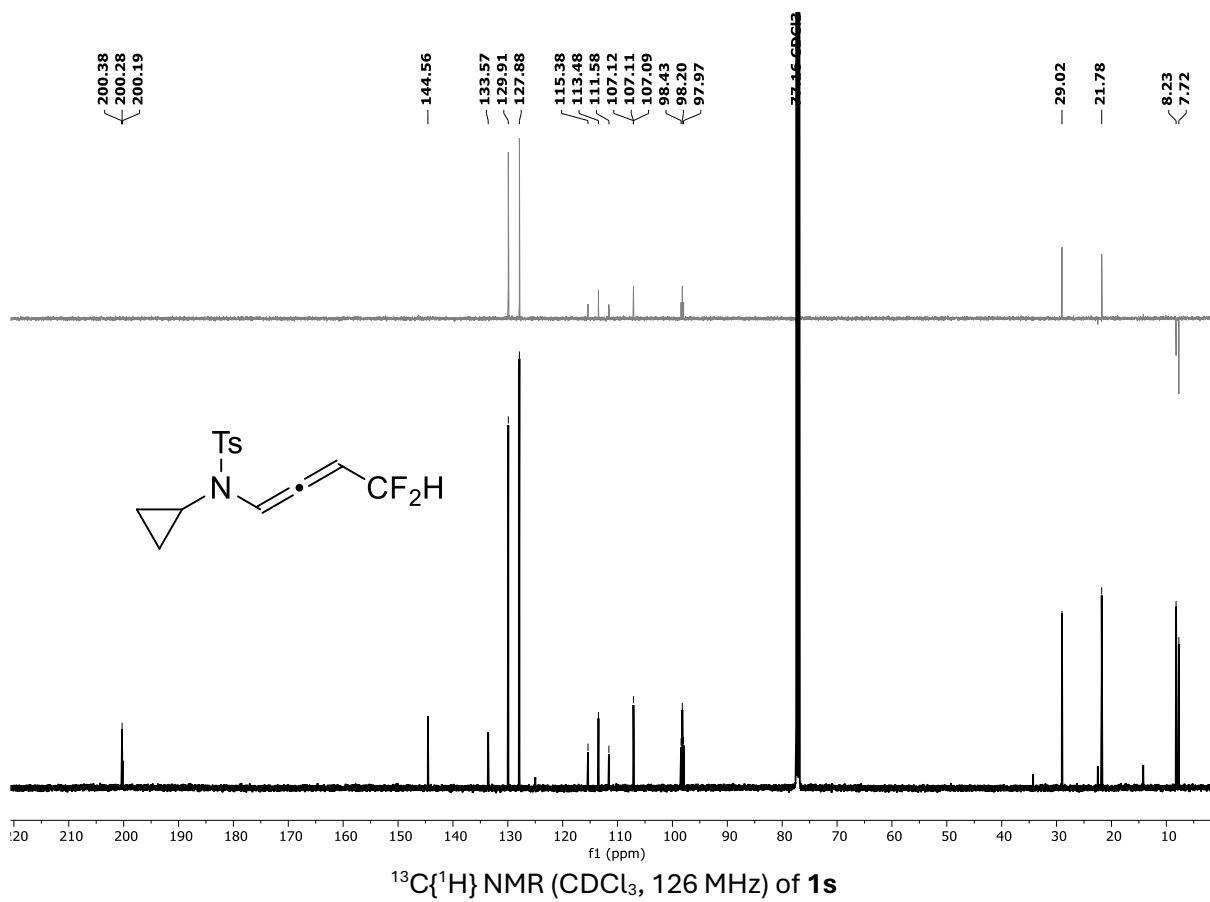



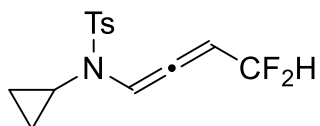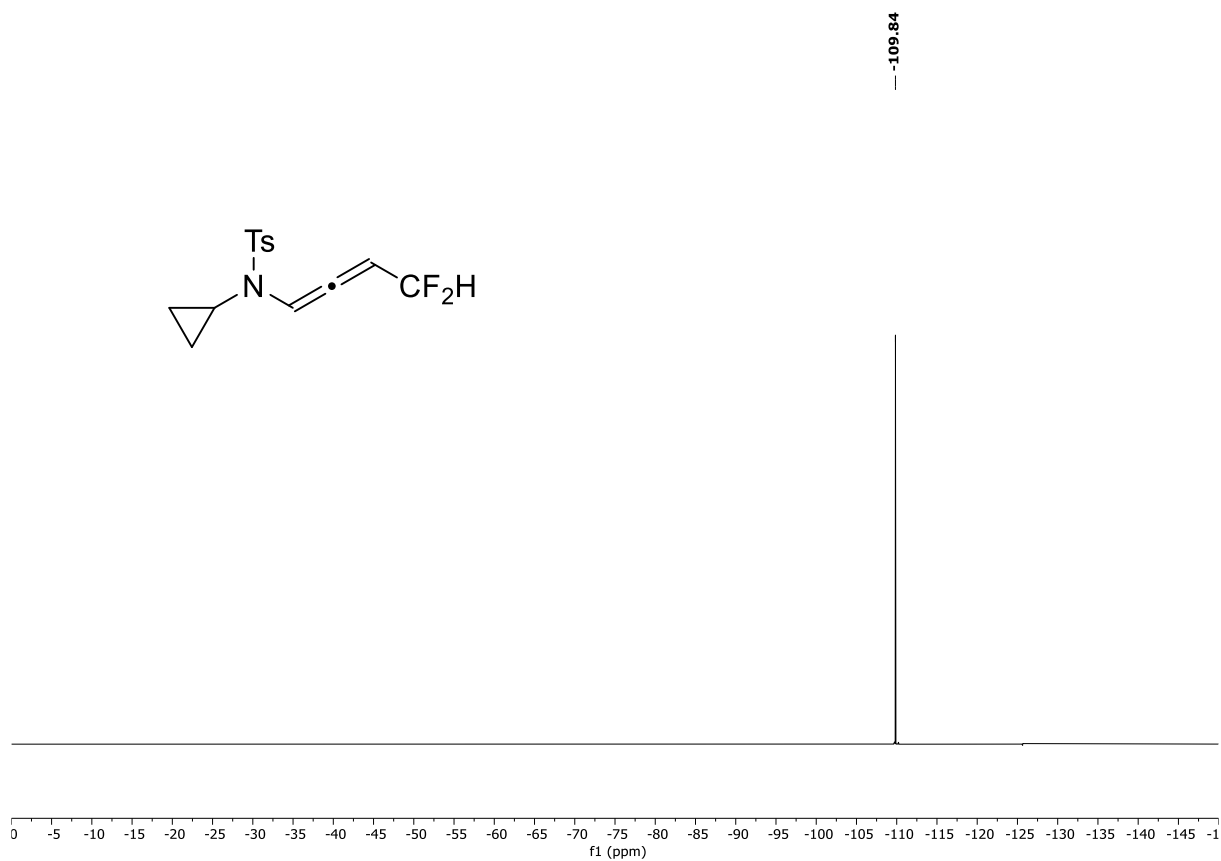

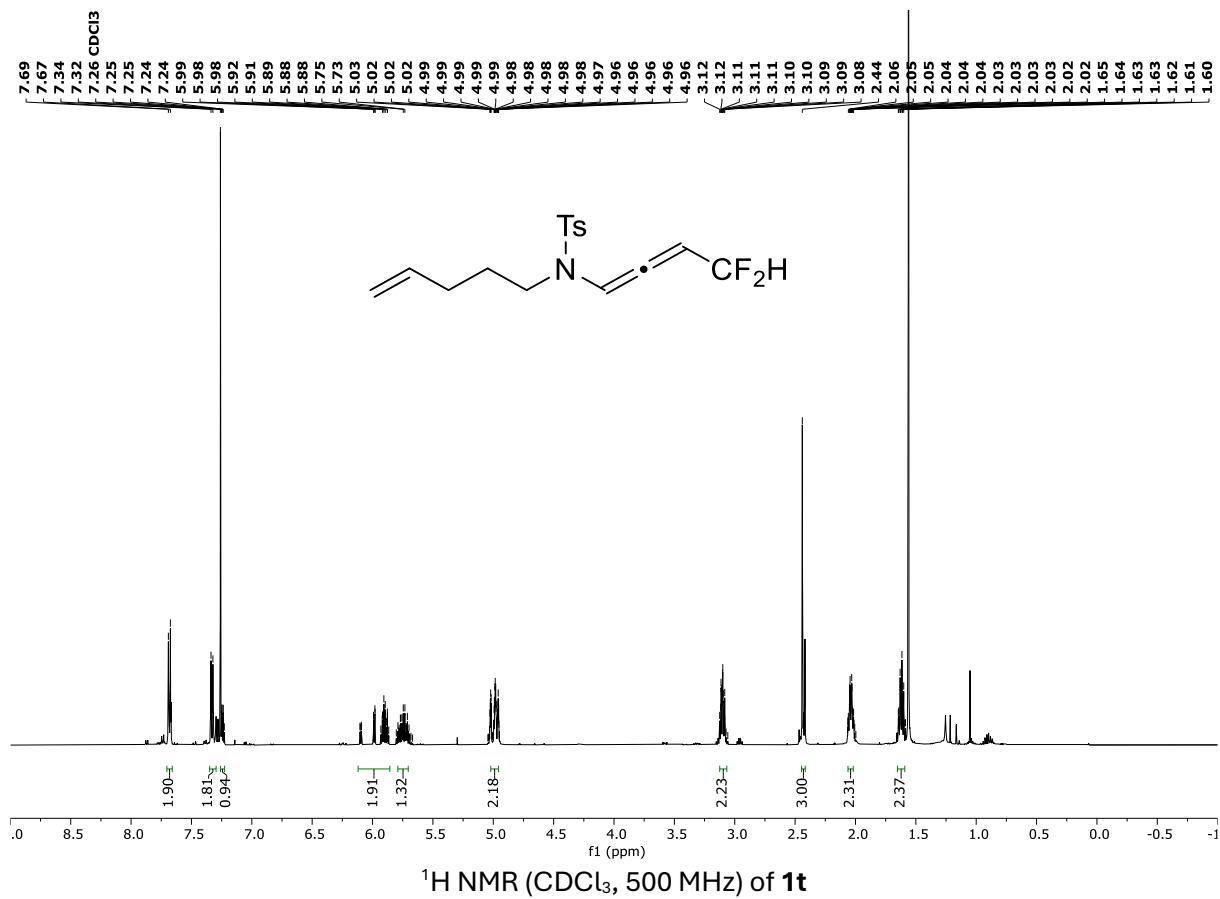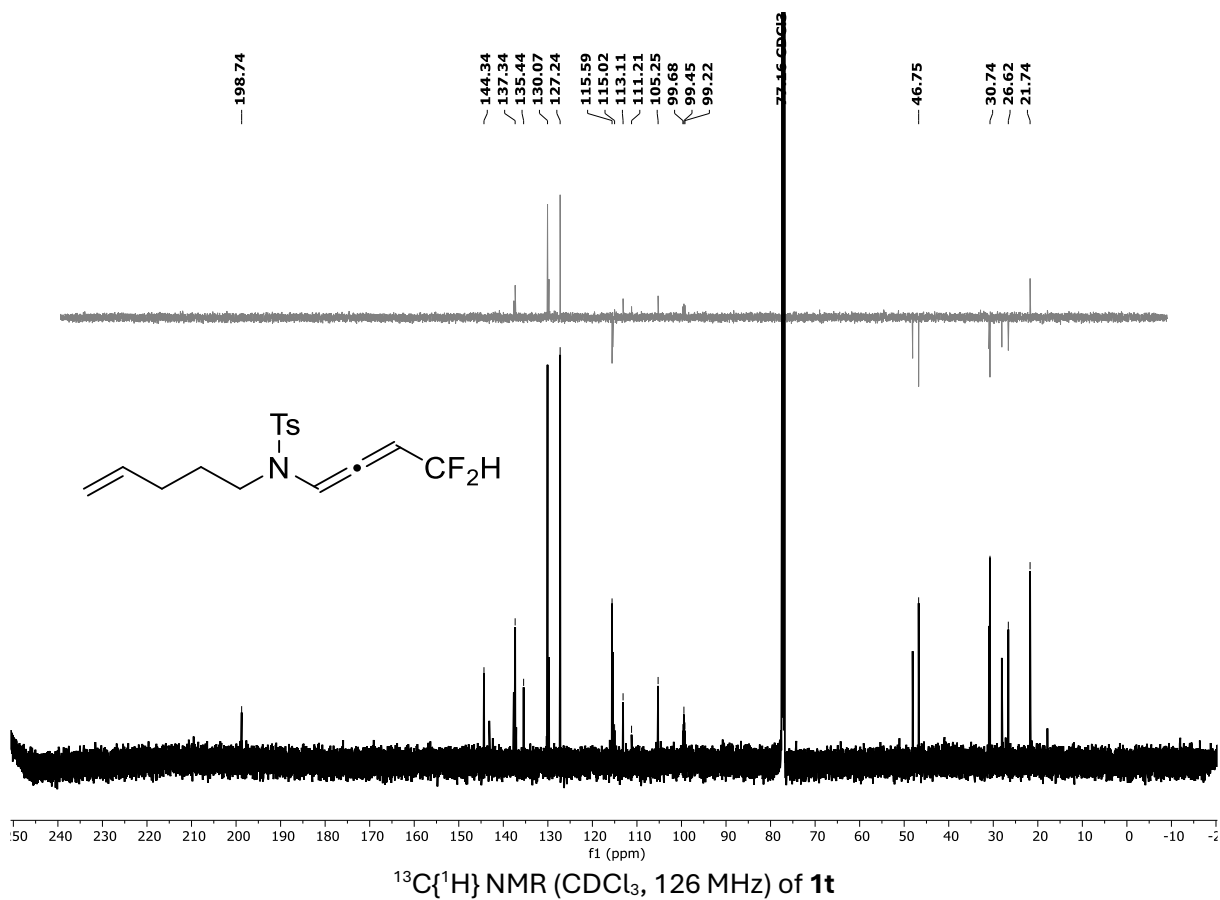

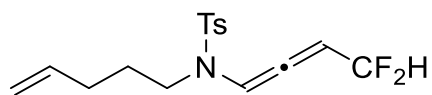

-109.20  
-109.84  
-109.98  
-110.62

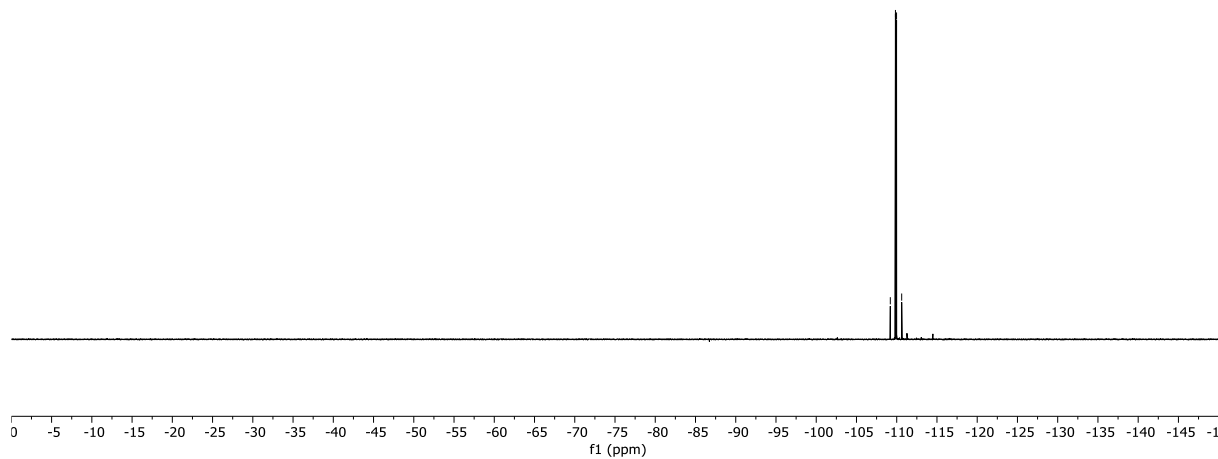

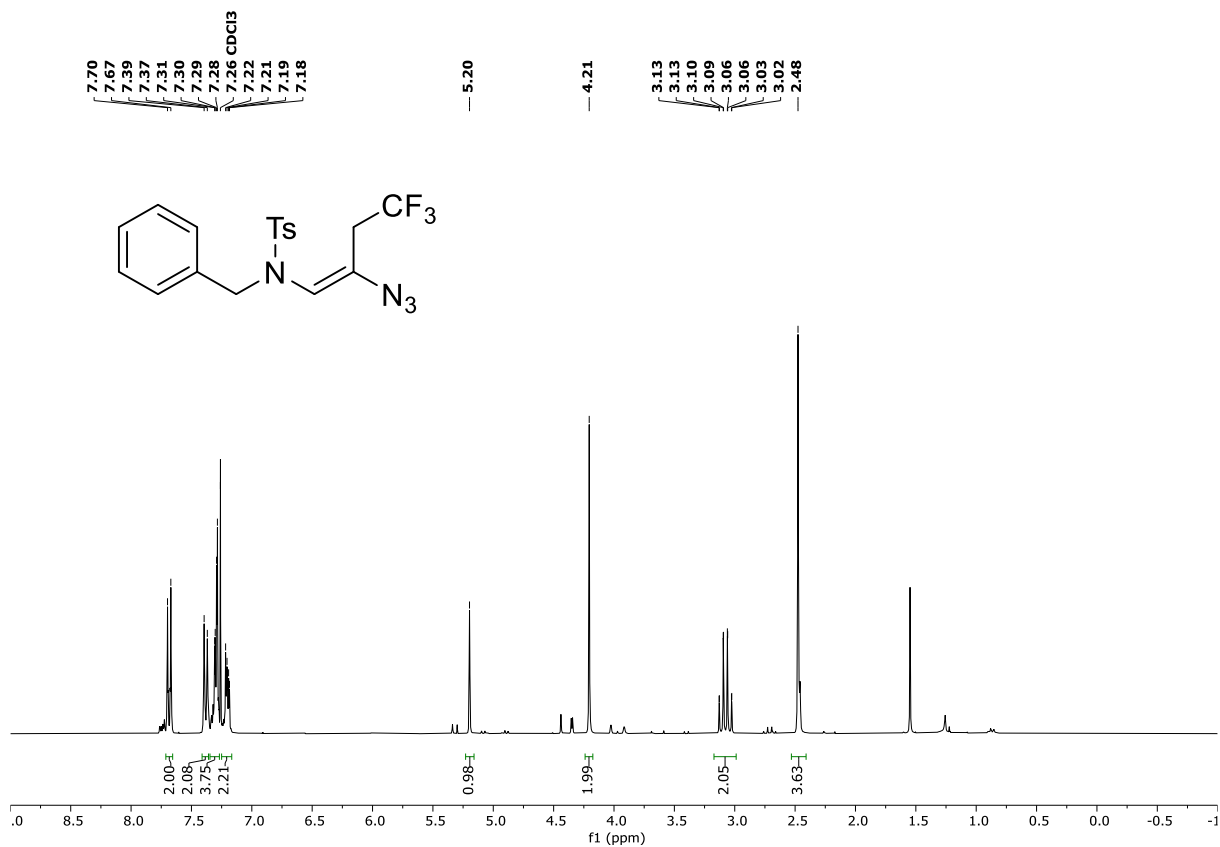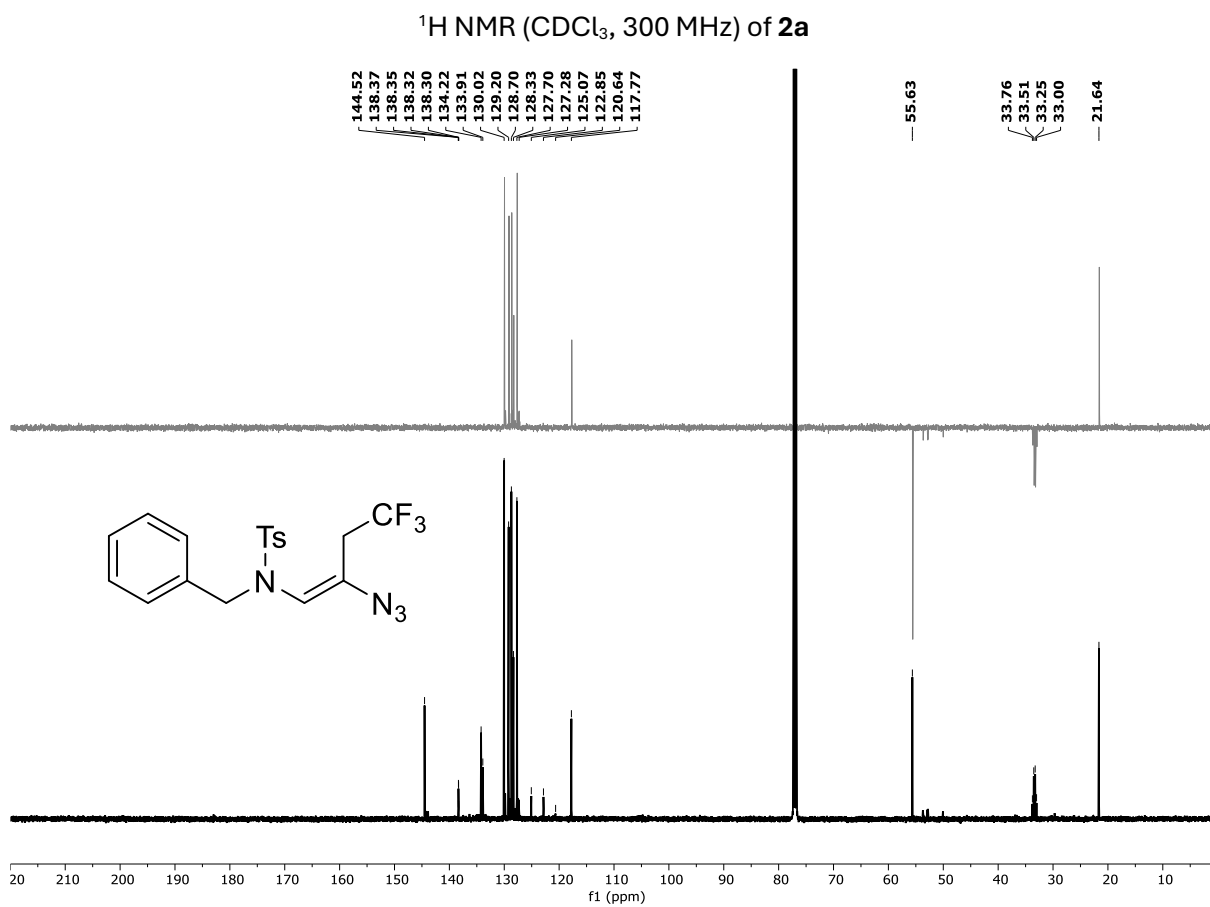

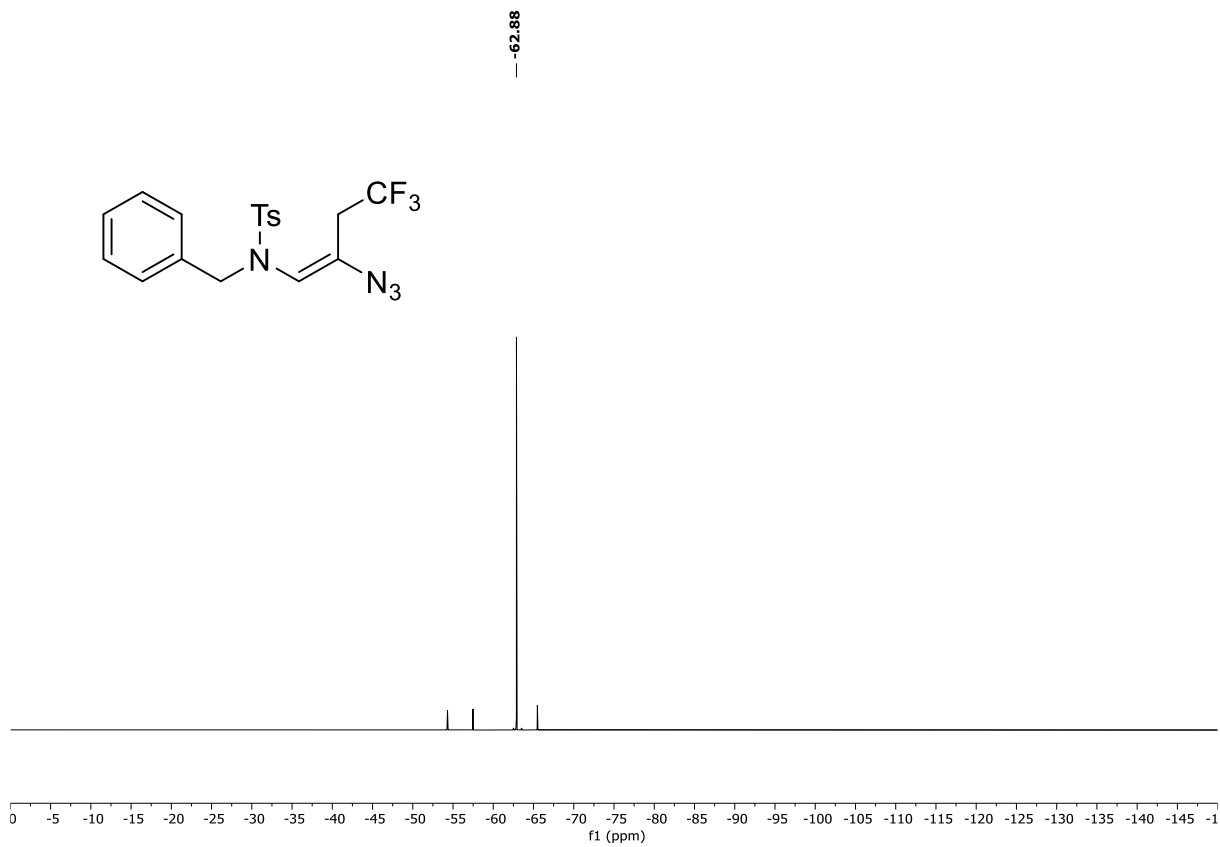

$^{19}\text{F}\{^1\text{H}\}$  NMR ( $\text{CDCl}_3$ , 282 MHz) of **2a**

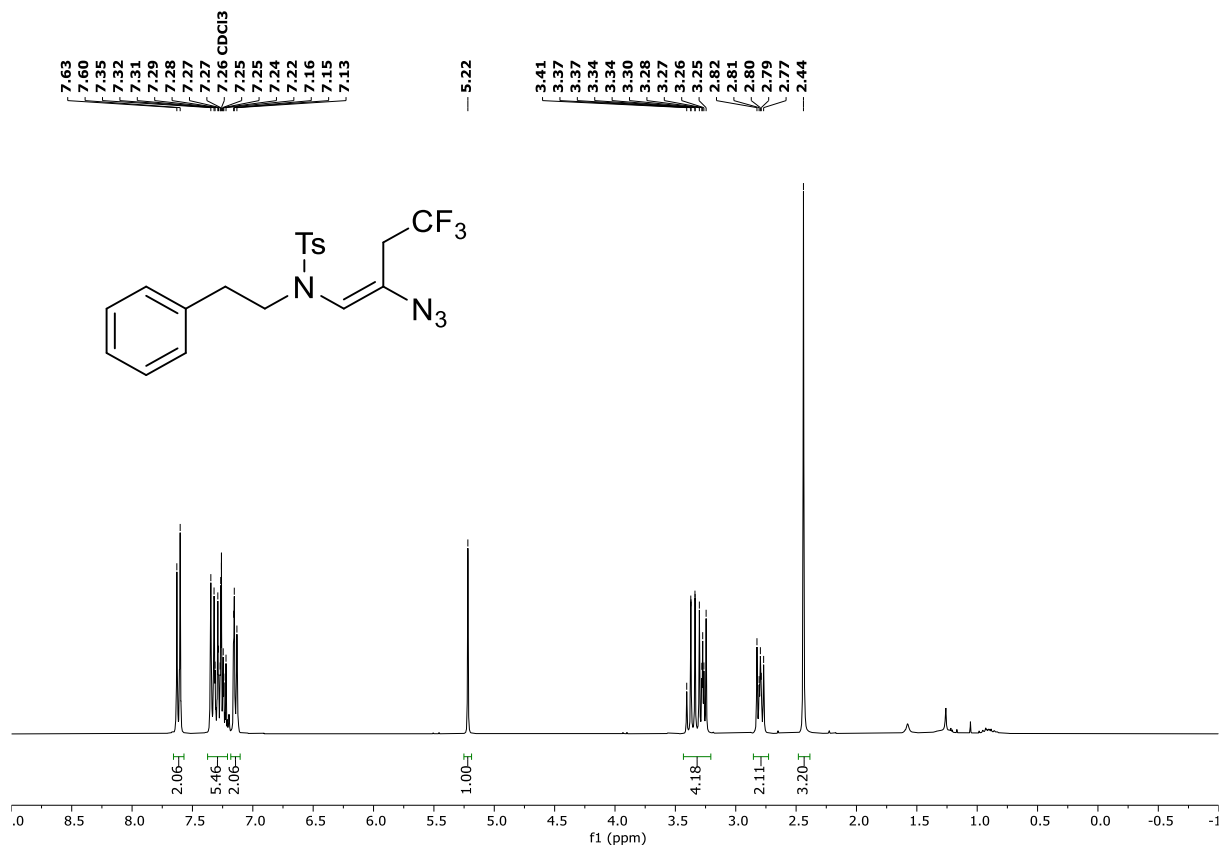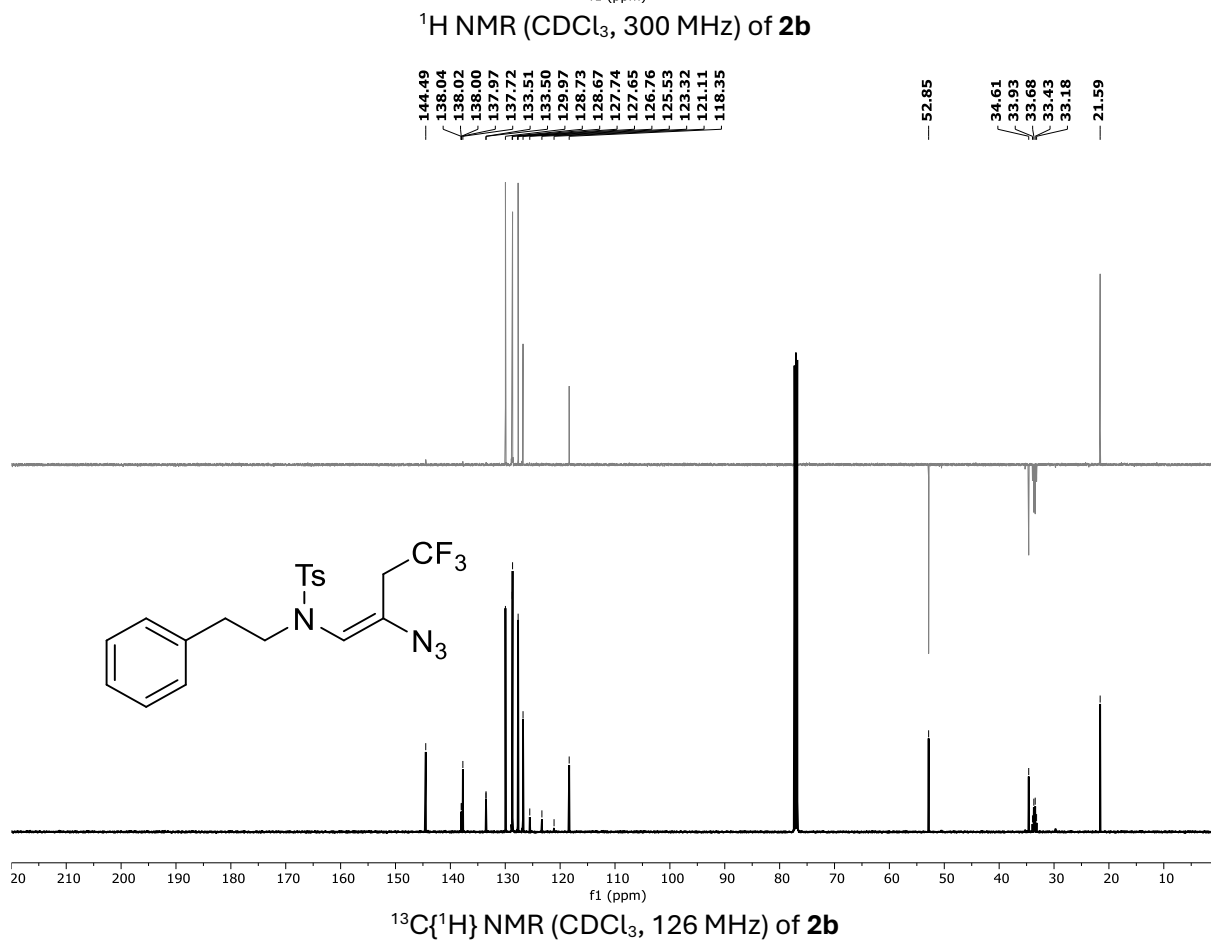

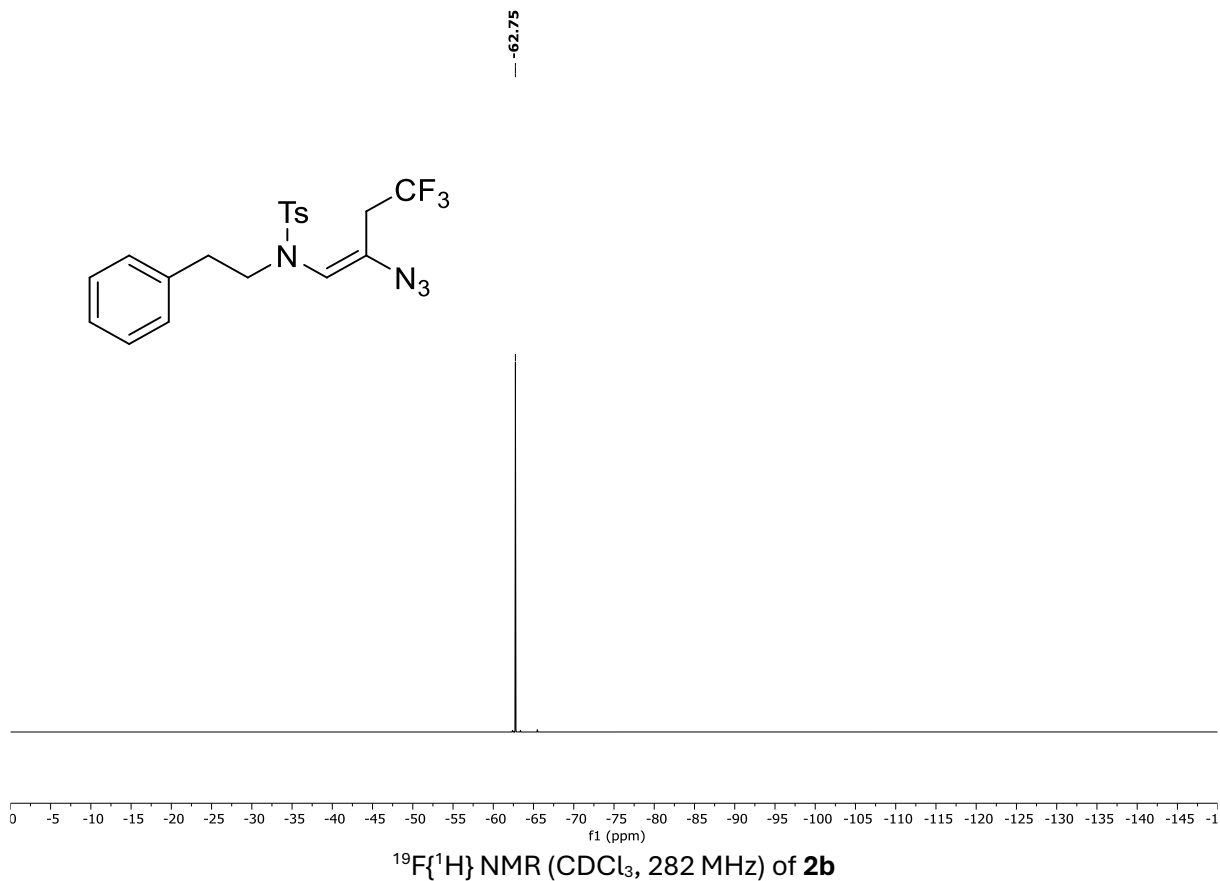

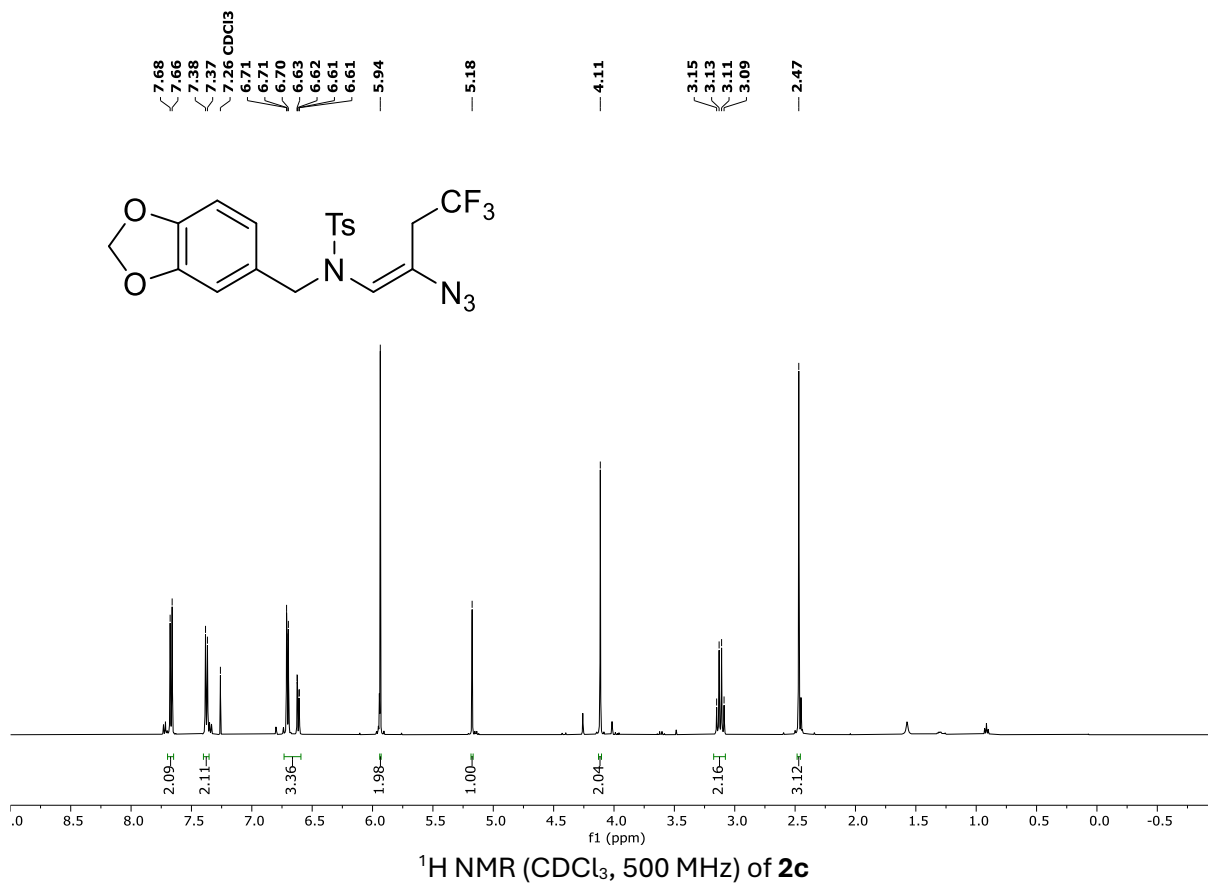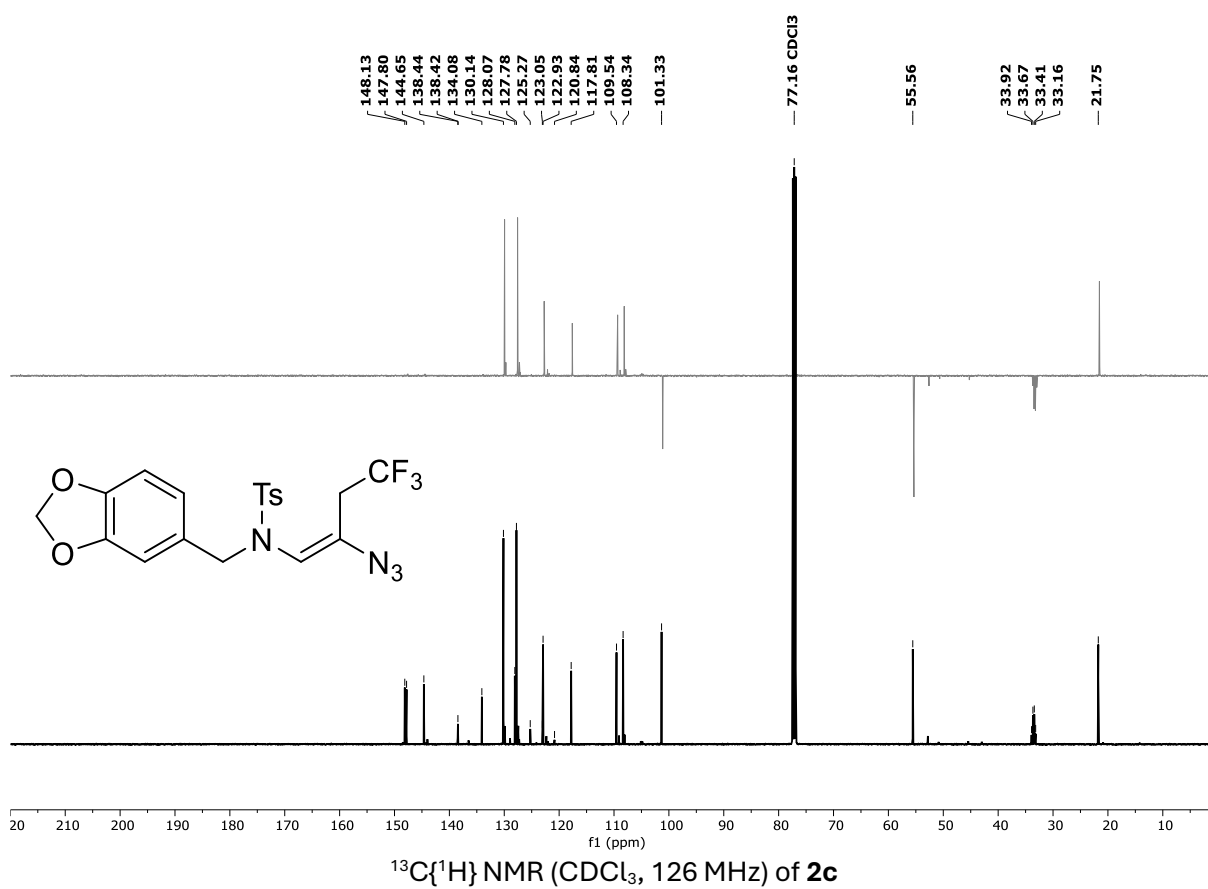



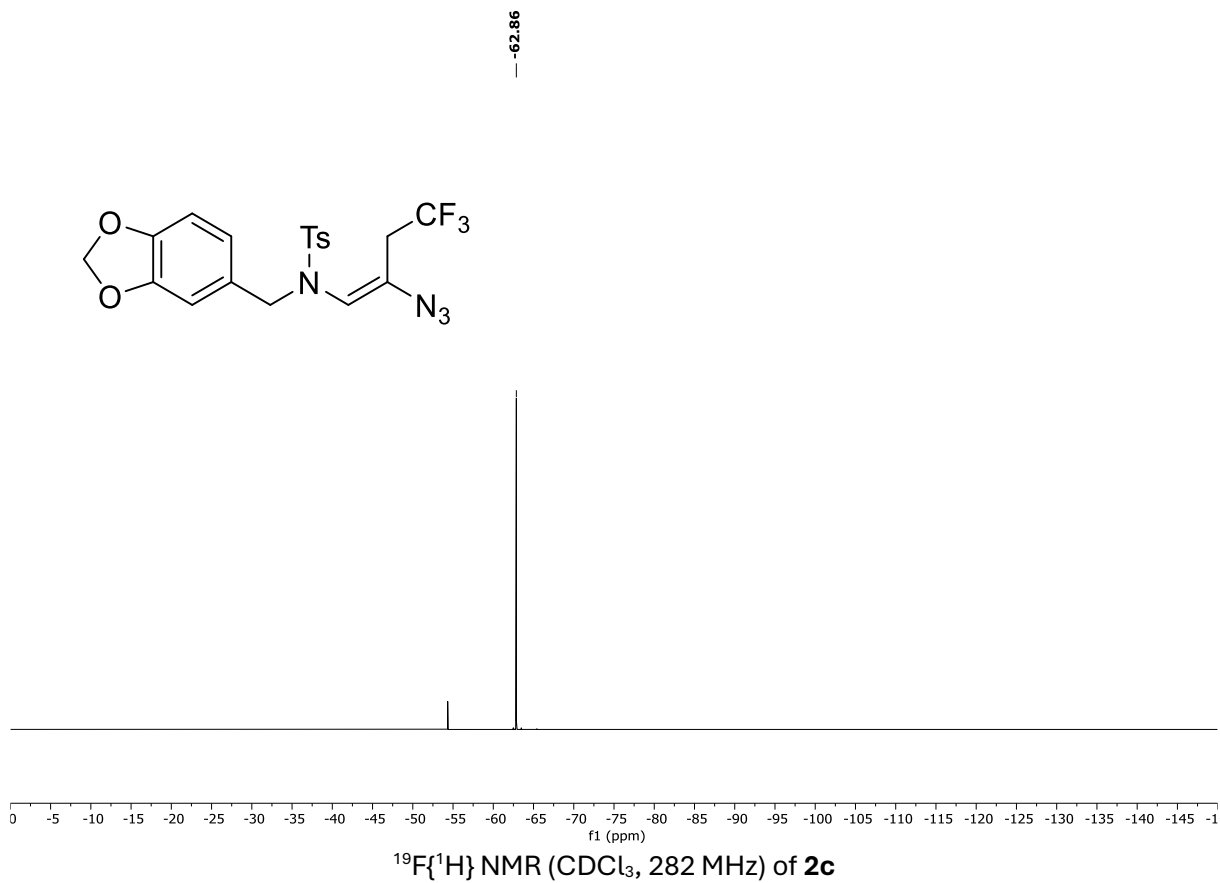

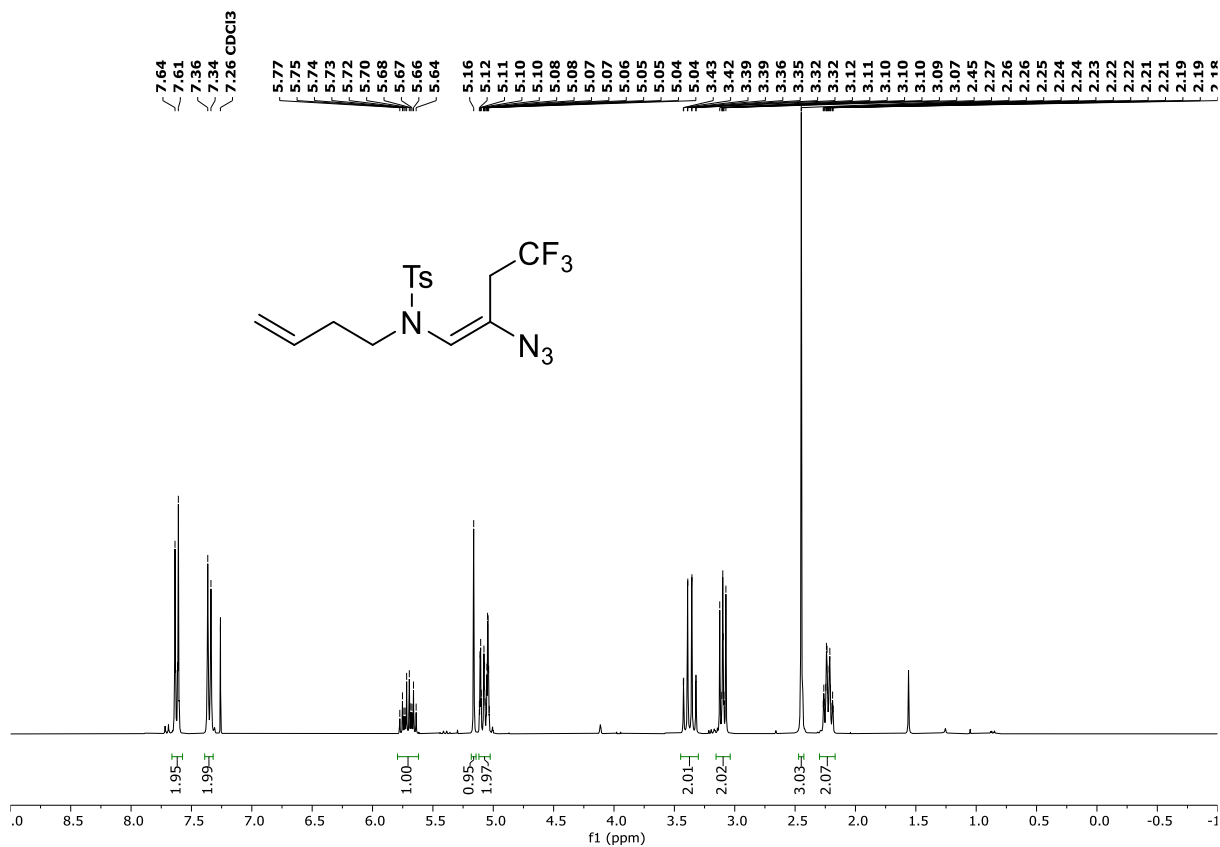

<sup>1</sup>H NMR (CDCl<sub>3</sub>, 300 MHz) of **2d**

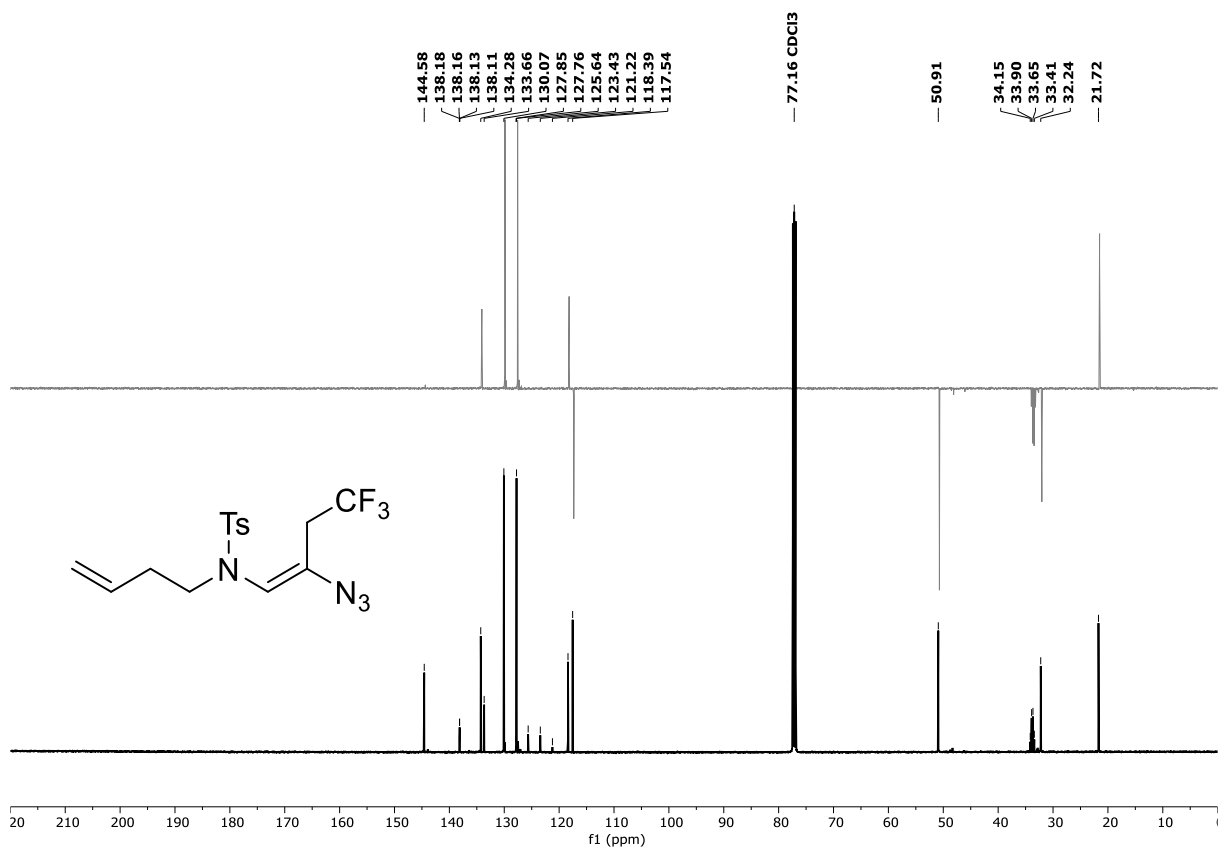

<sup>13</sup>C{<sup>1</sup>H} NMR (CDCl<sub>3</sub>, 126 MHz) of **2d**

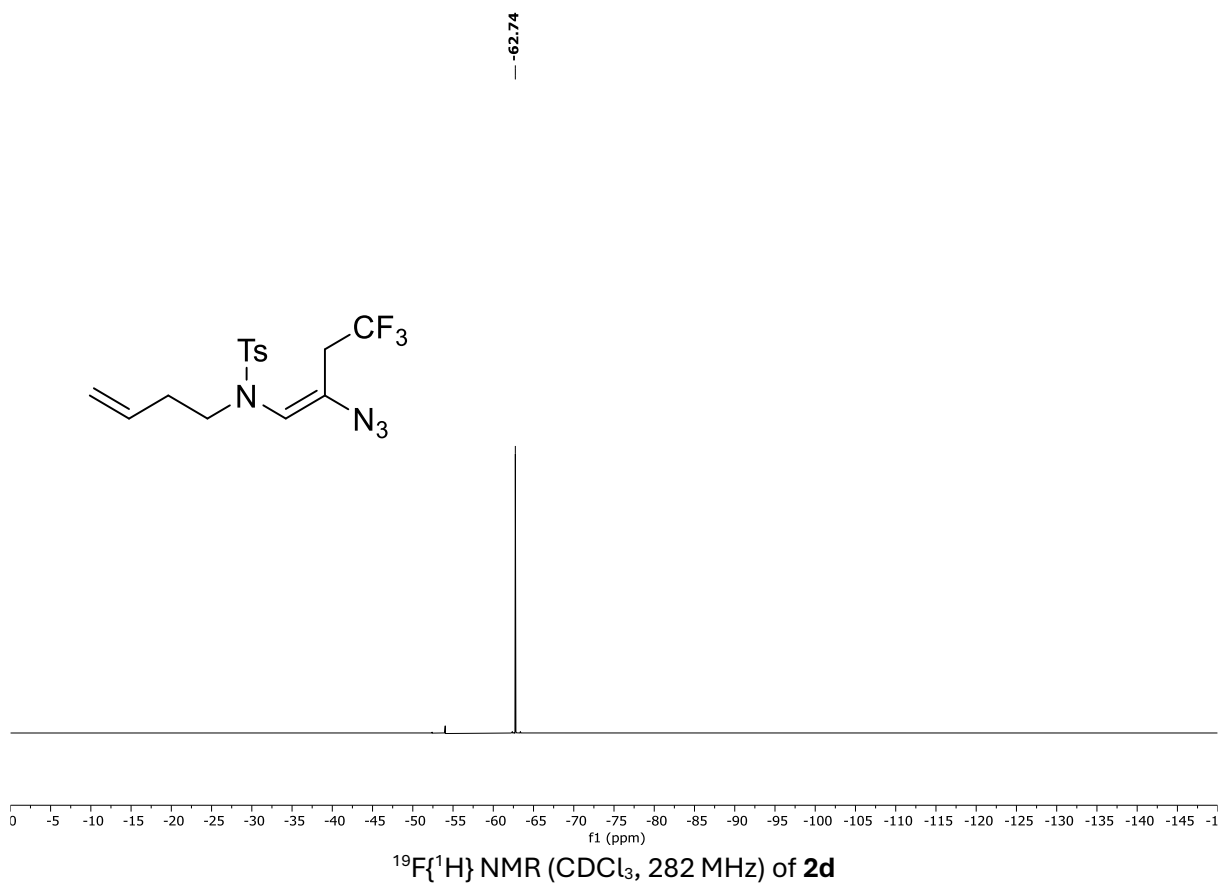

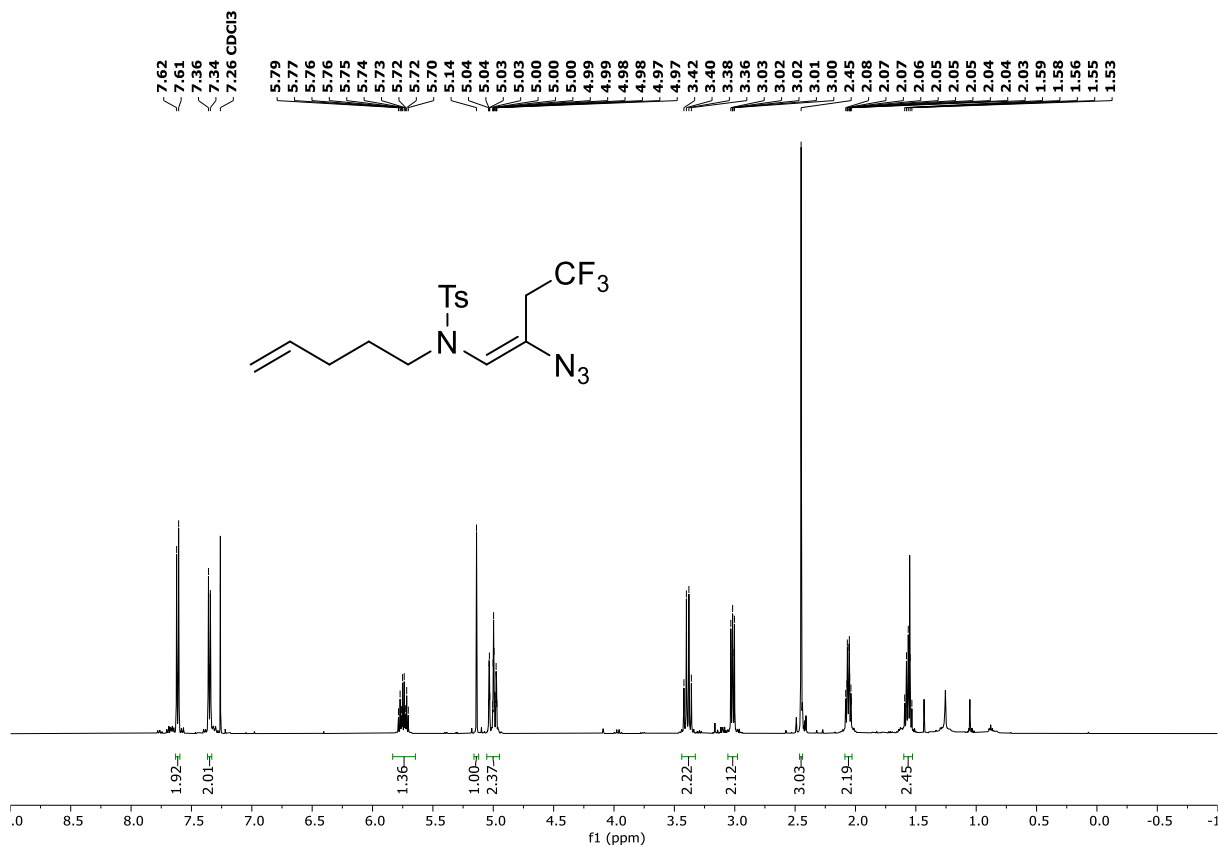

<sup>1</sup>H NMR (CDCl<sub>3</sub>, 300 MHz) of **2e**

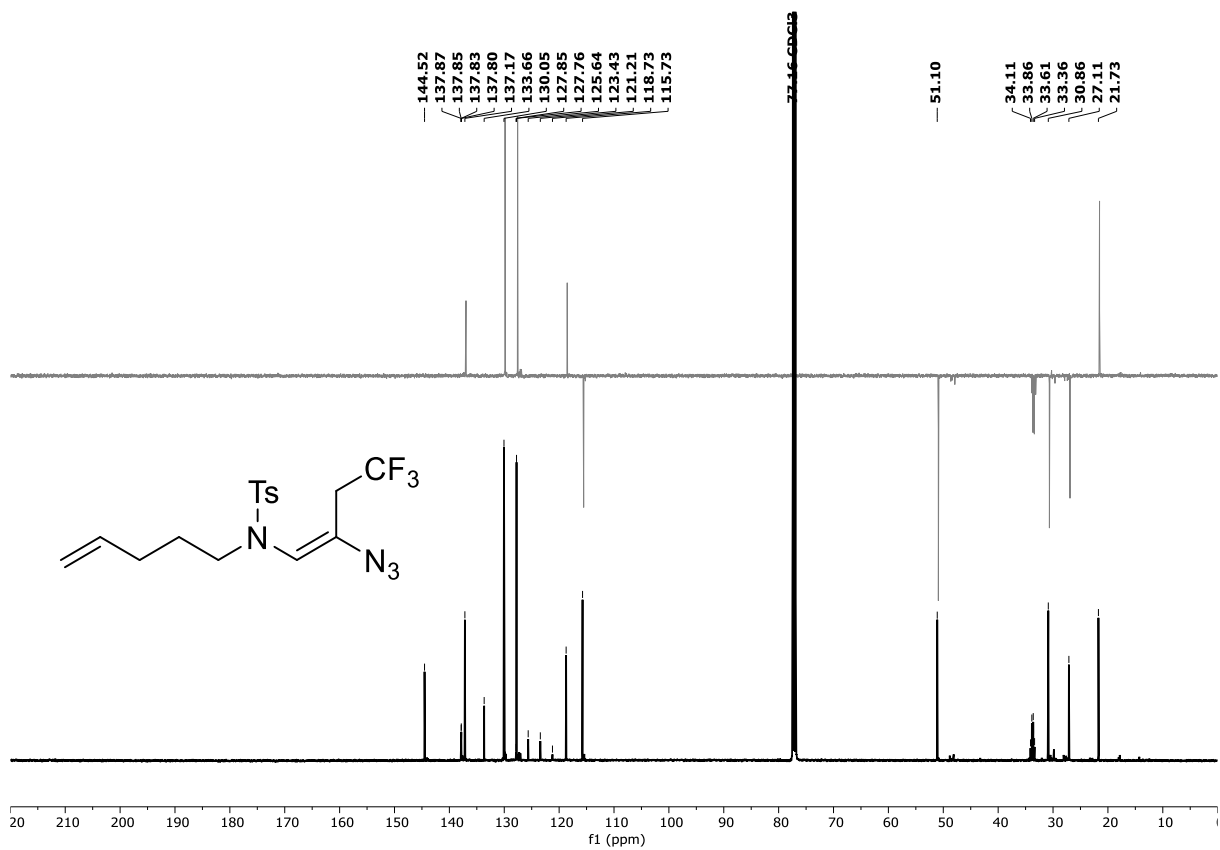

<sup>13</sup>C NMR (CDCl<sub>3</sub>, 126 MHz) of **2e**

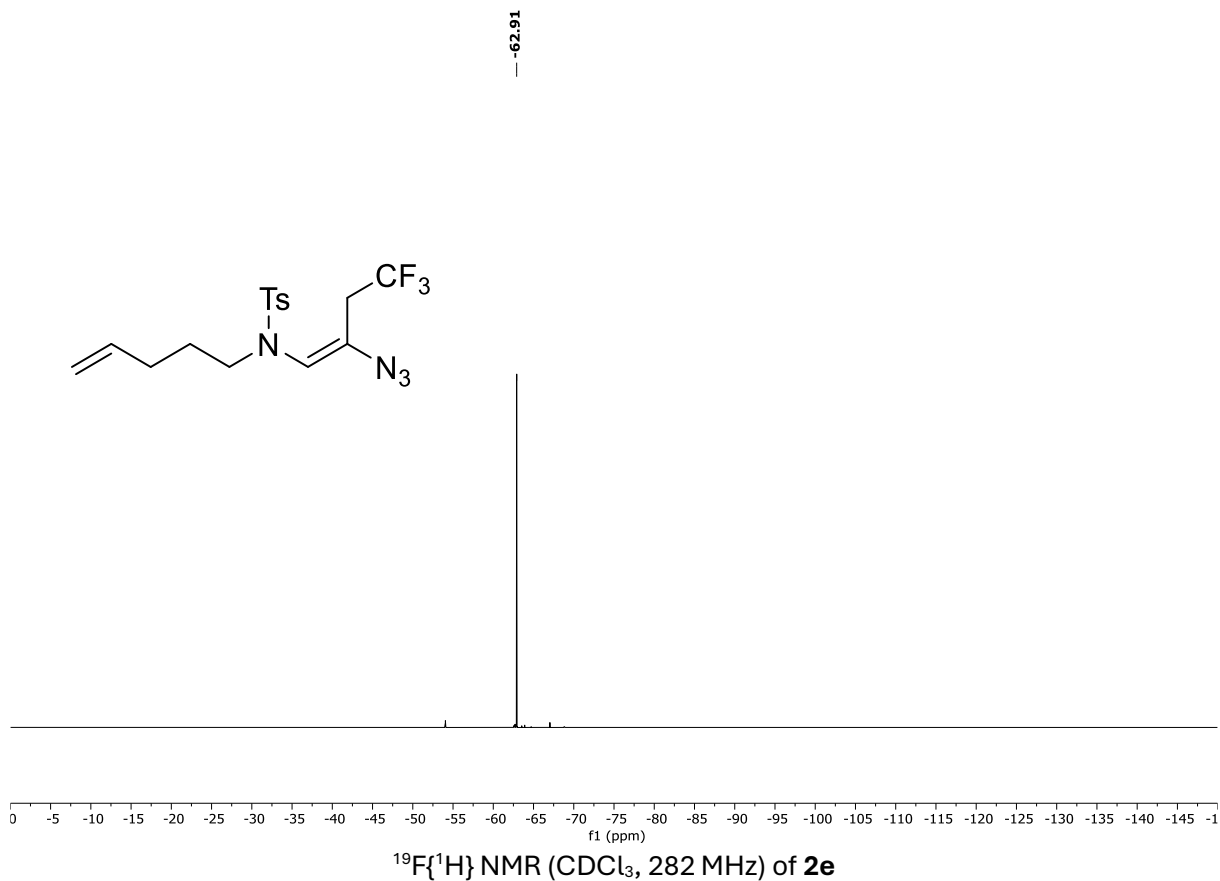

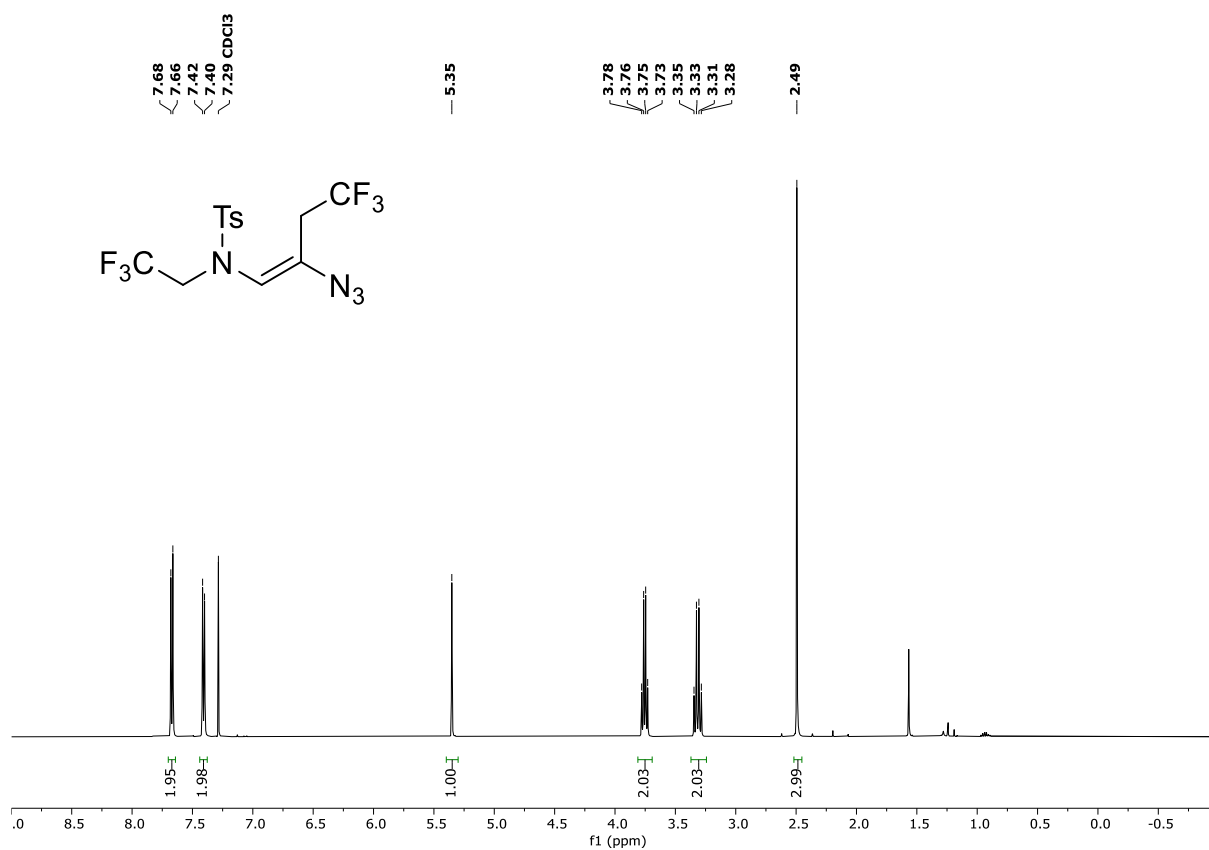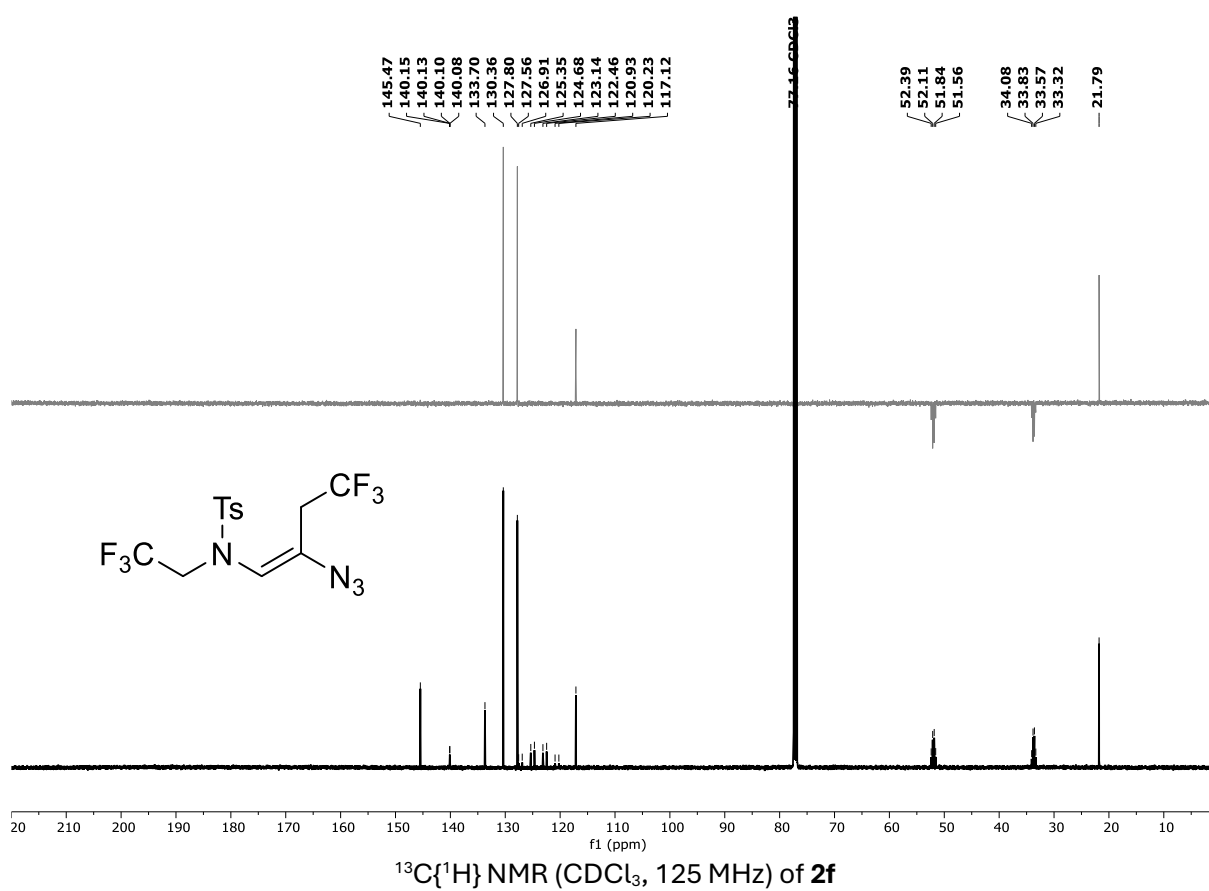

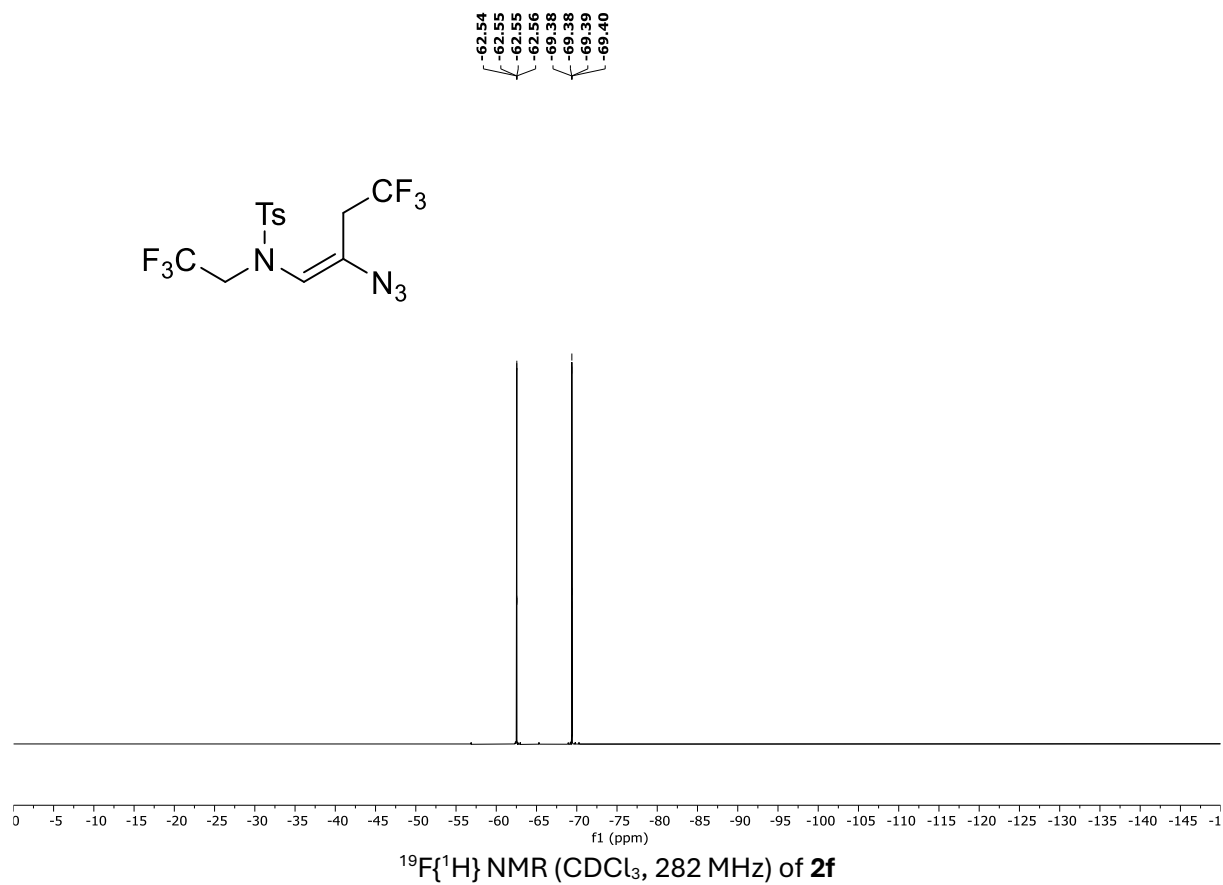

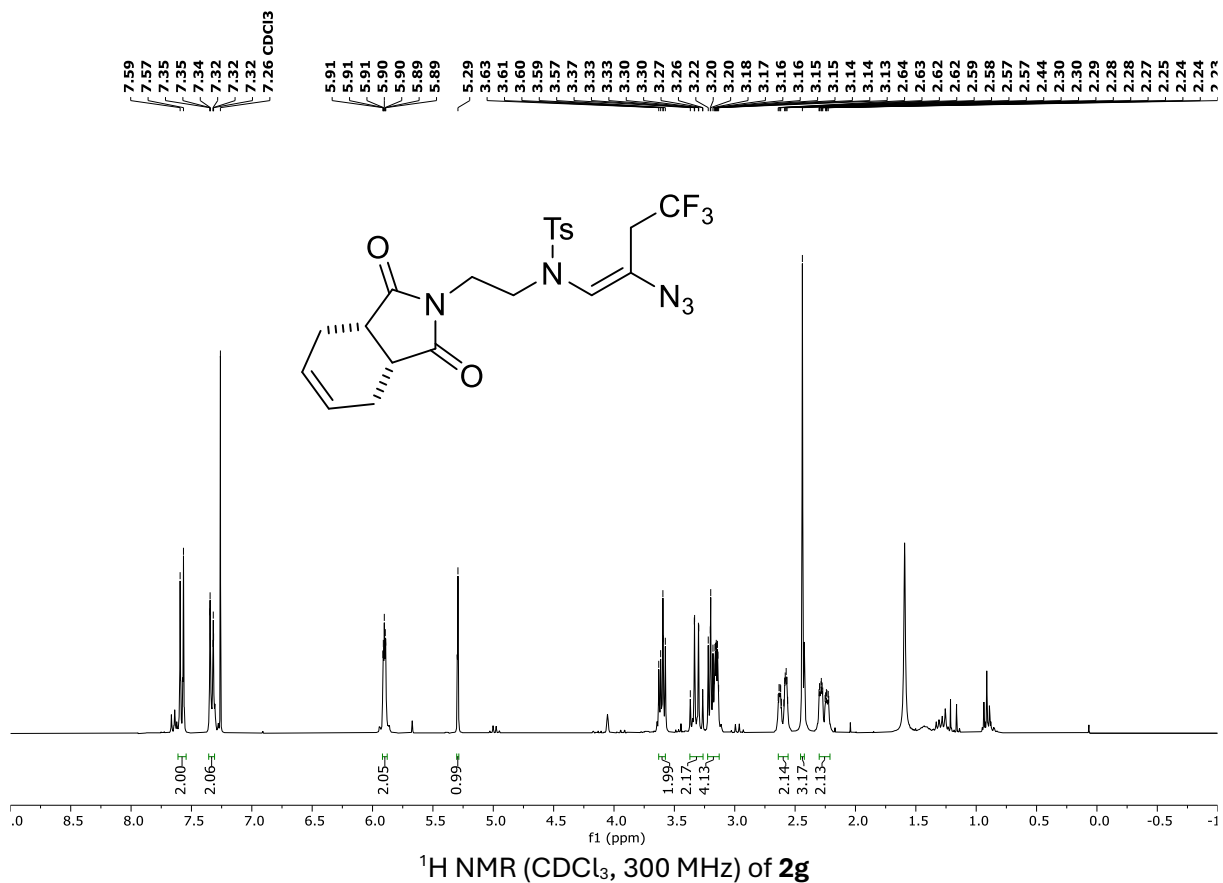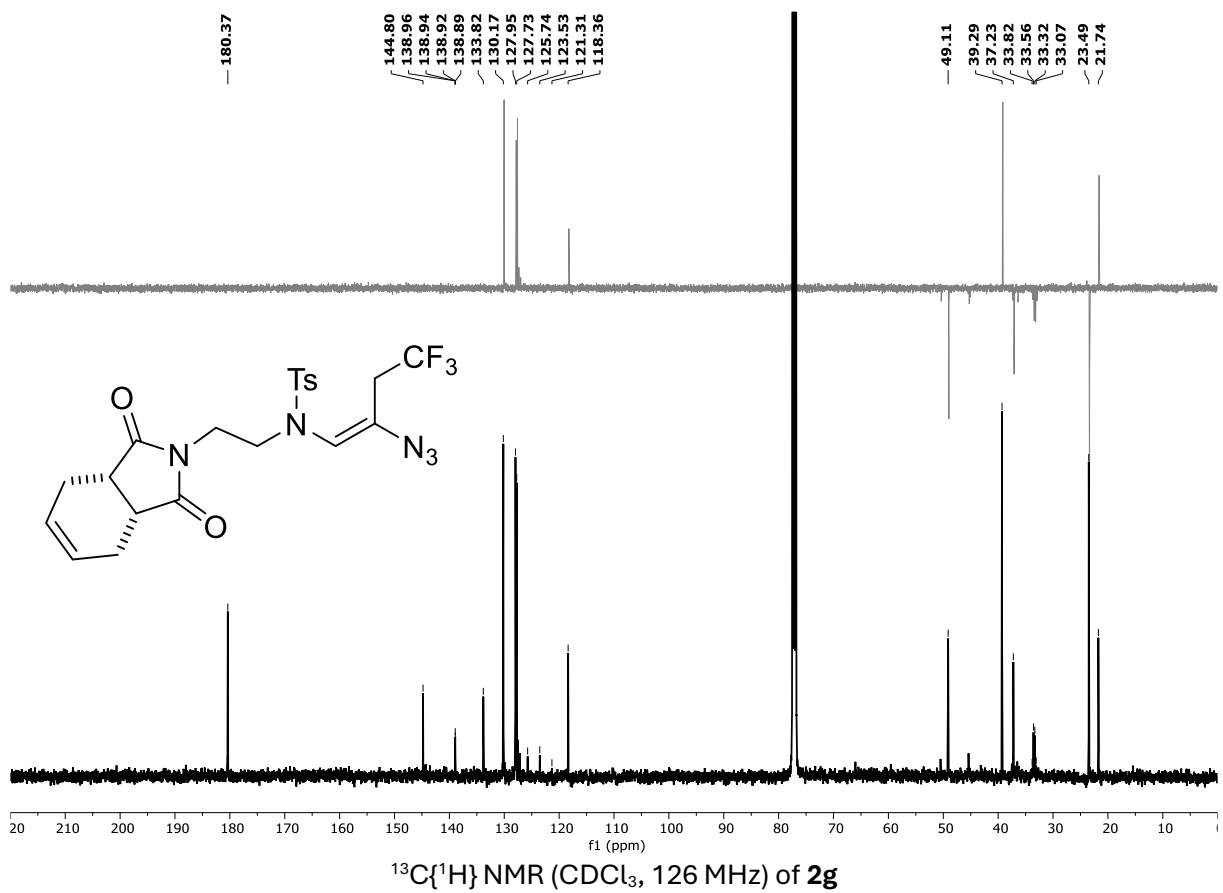



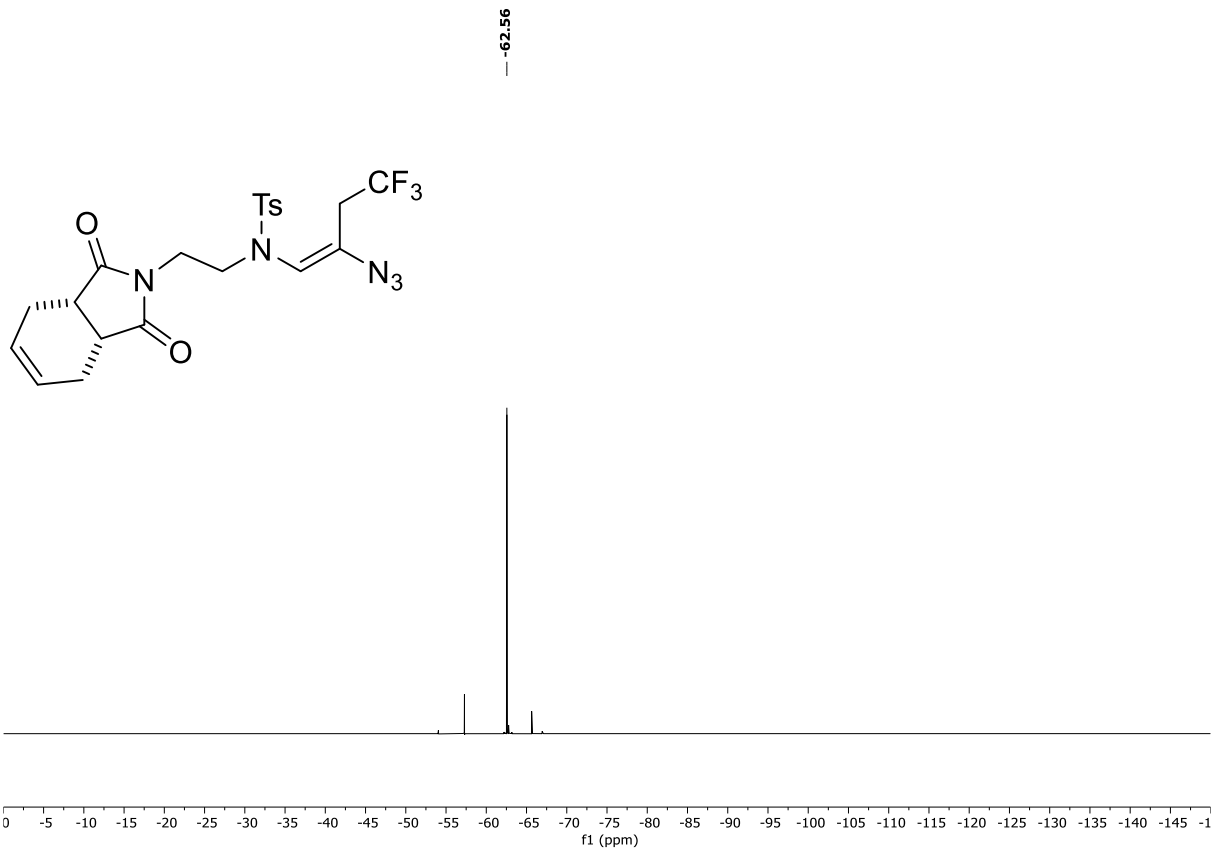

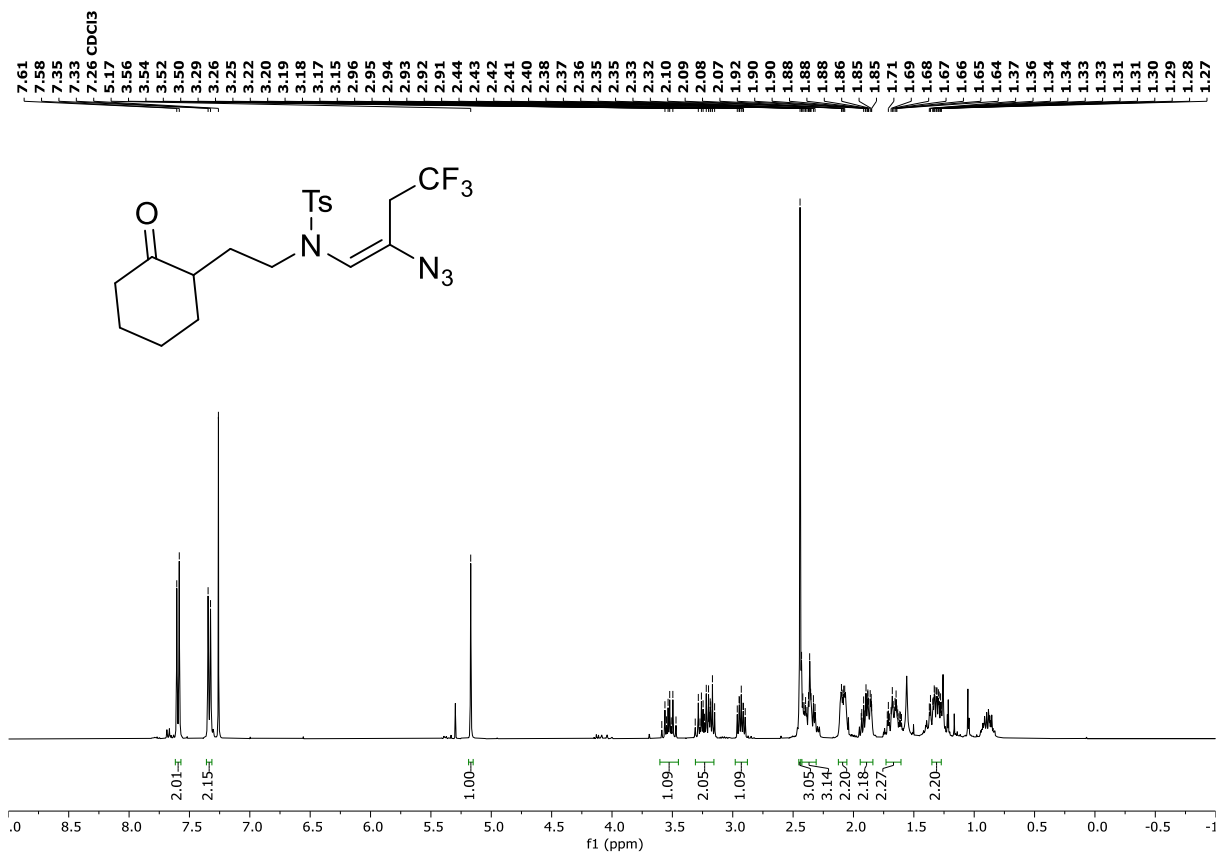

<sup>1</sup>H NMR (CDCl<sub>3</sub>, 400 MHz) of **2h**

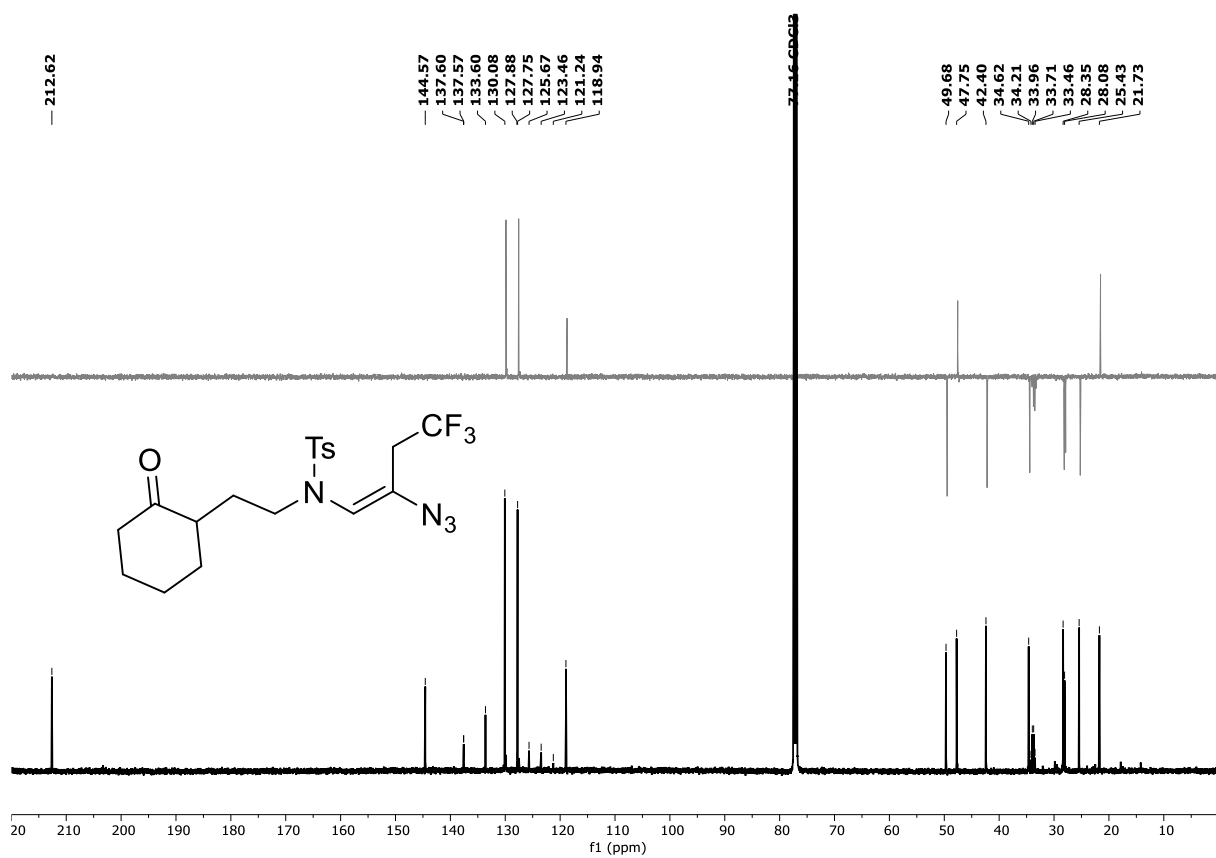

<sup>13</sup>C{<sup>1</sup>H} NMR (CDCl<sub>3</sub>, 126 MHz) of **2h**

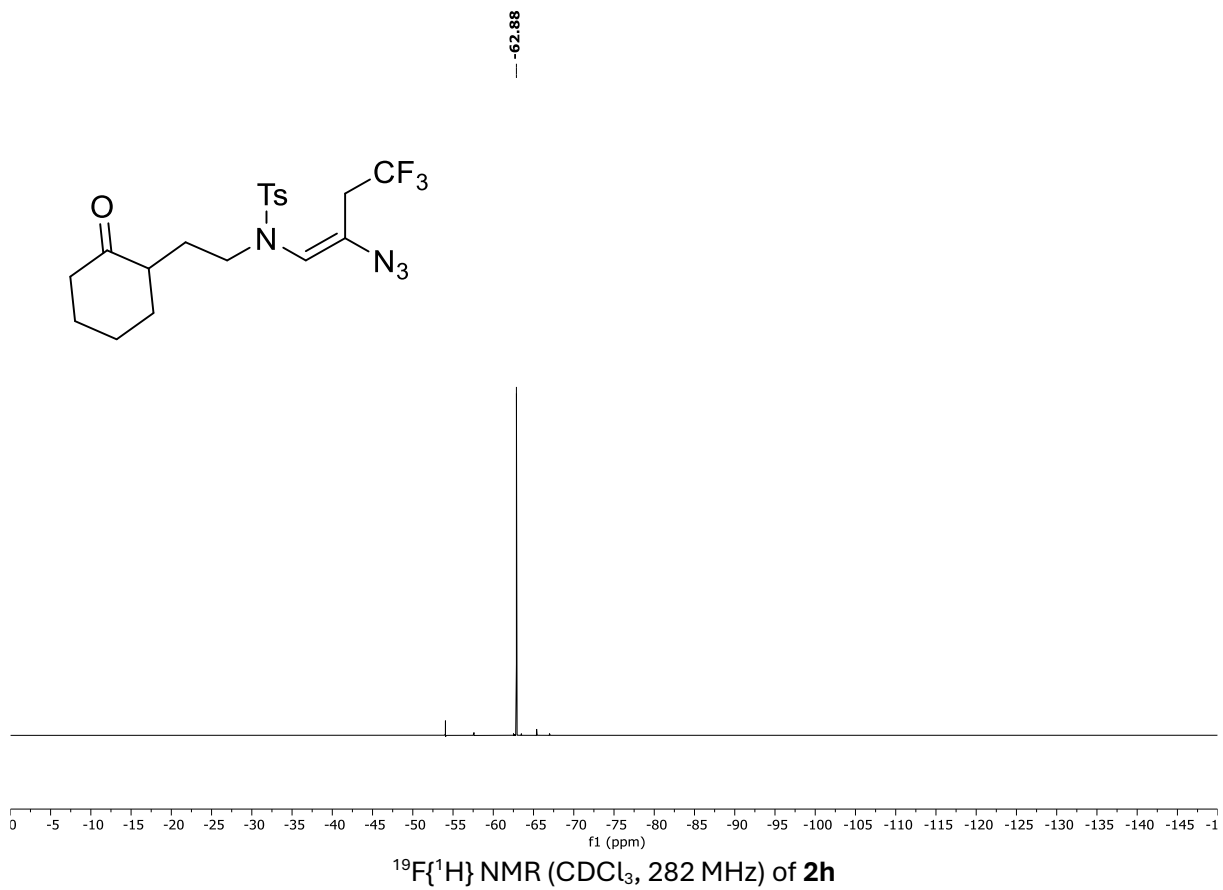

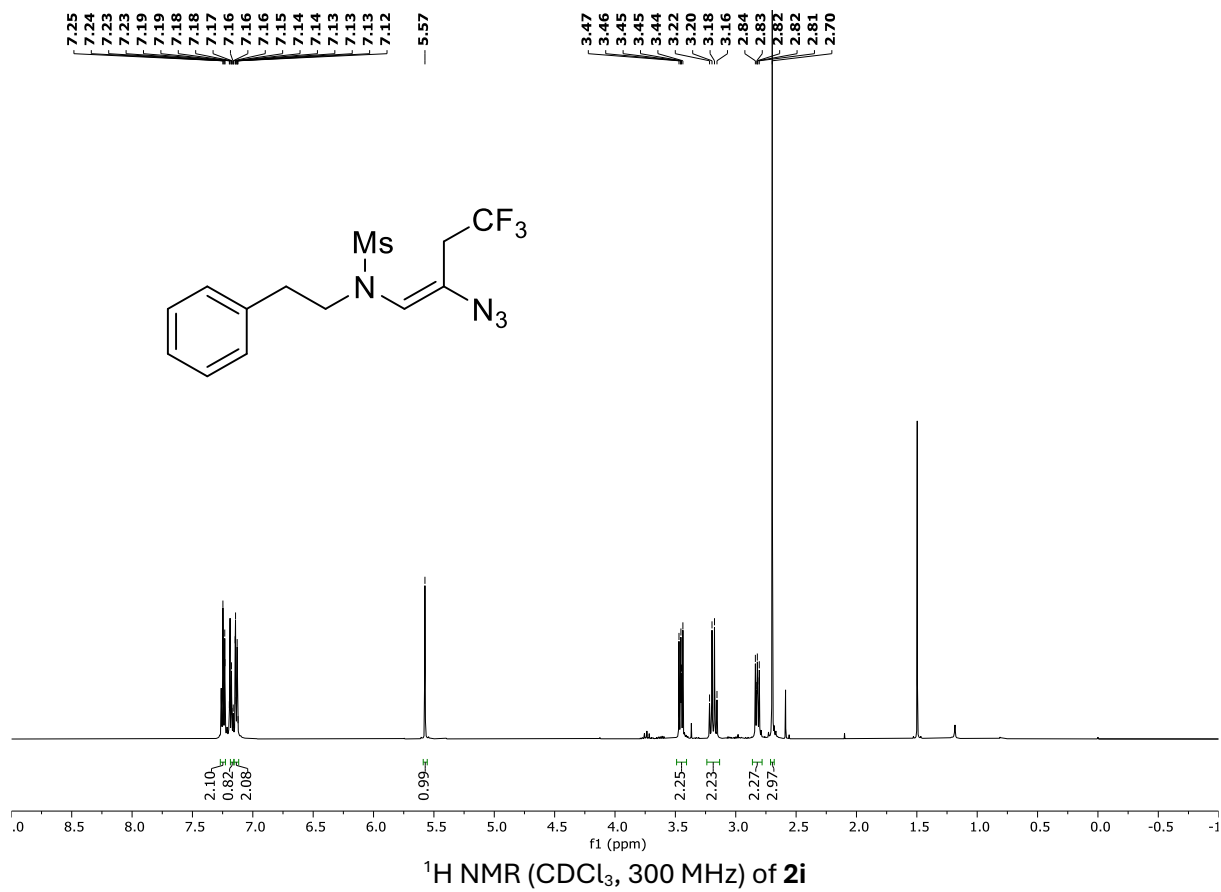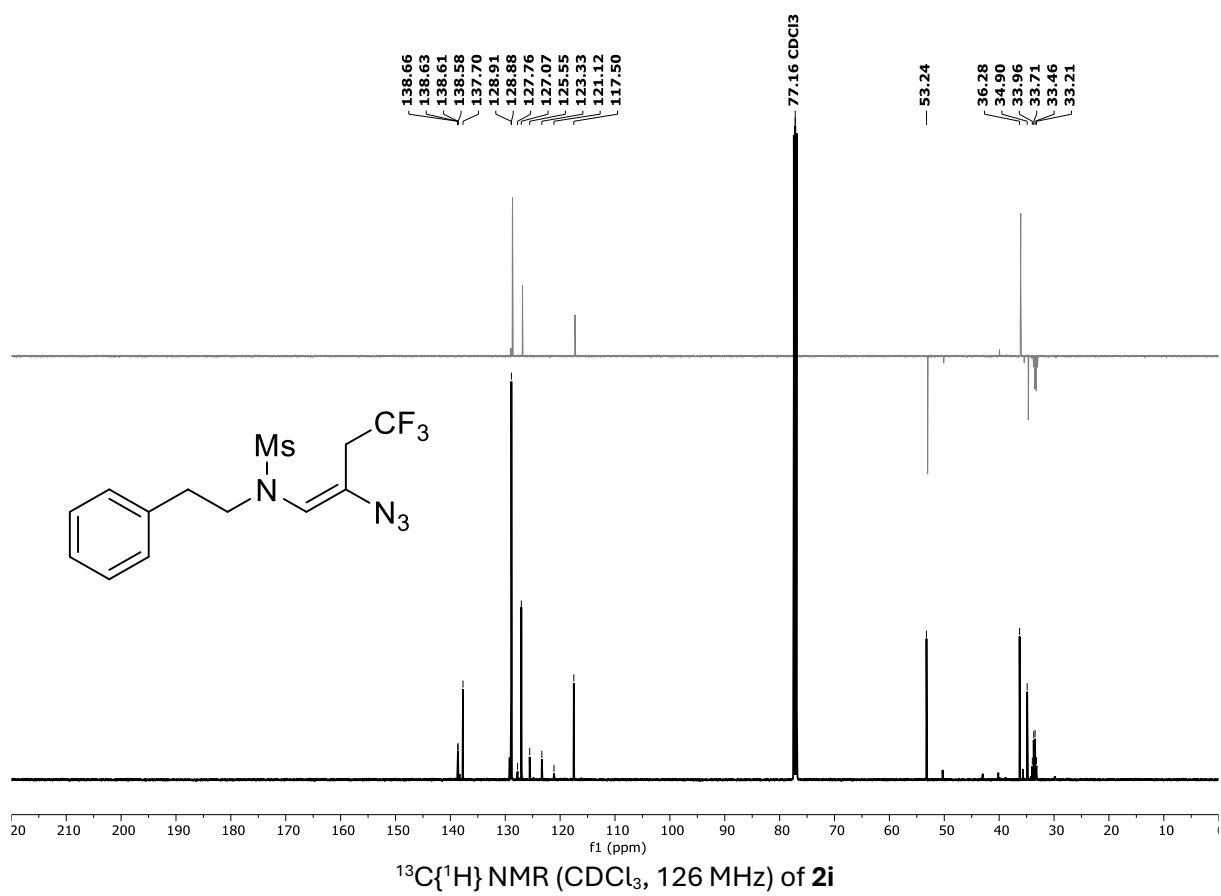

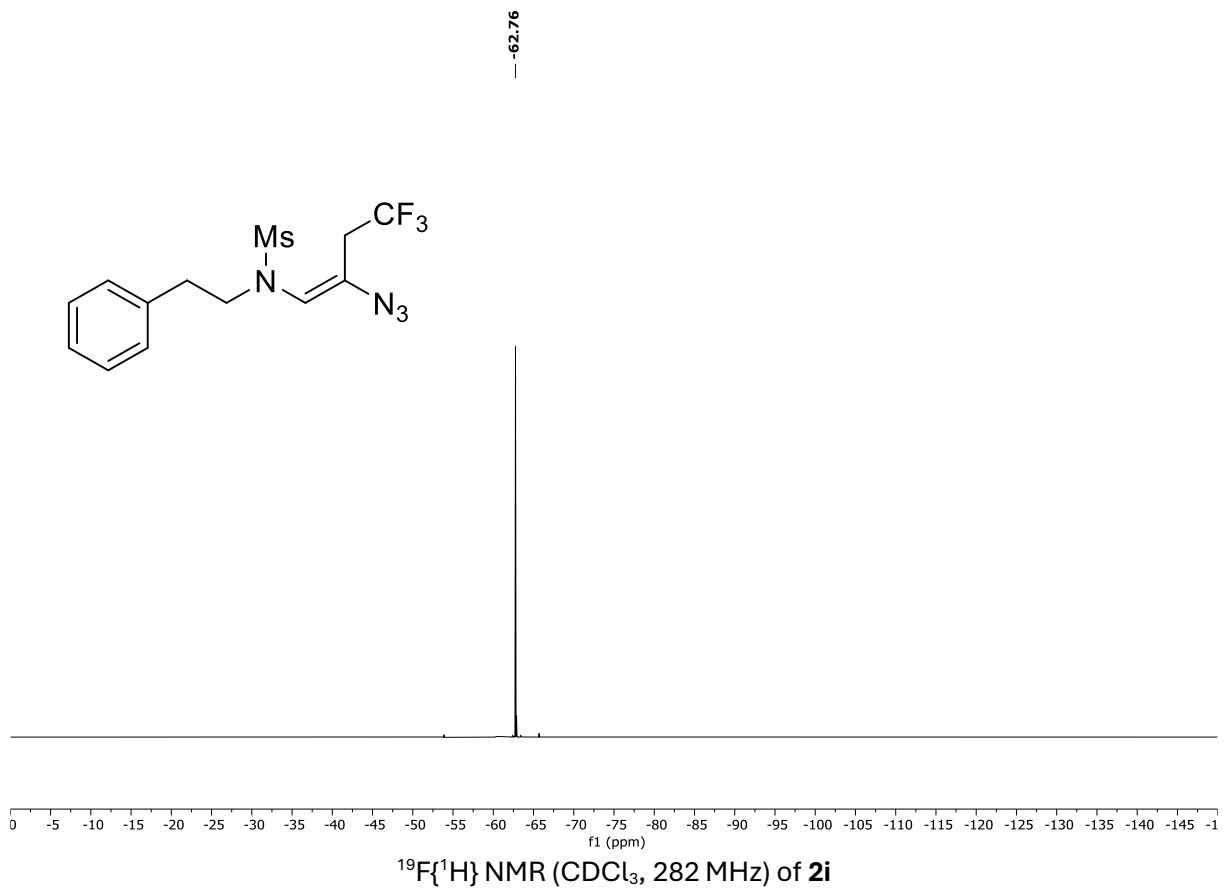

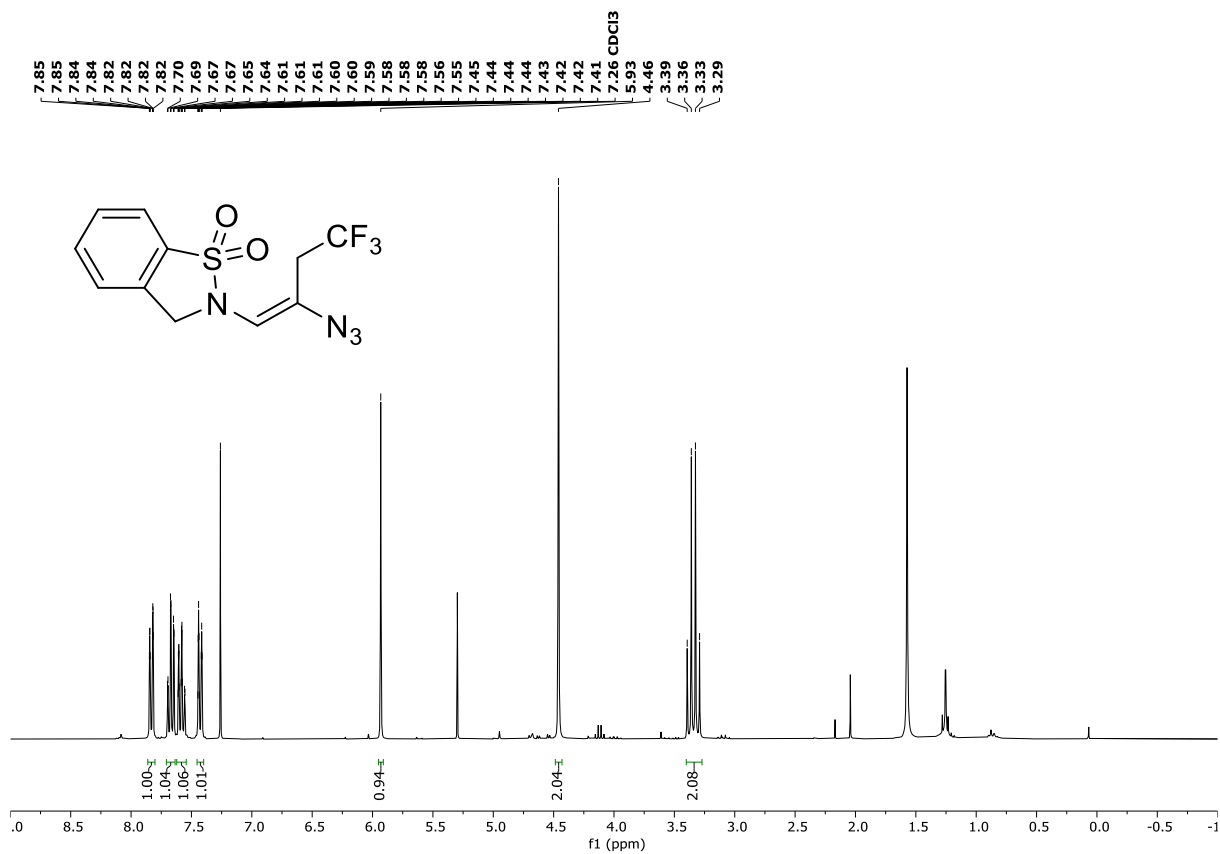

<sup>1</sup>H NMR (CDCl<sub>3</sub>, 300 MHz) of **2j**

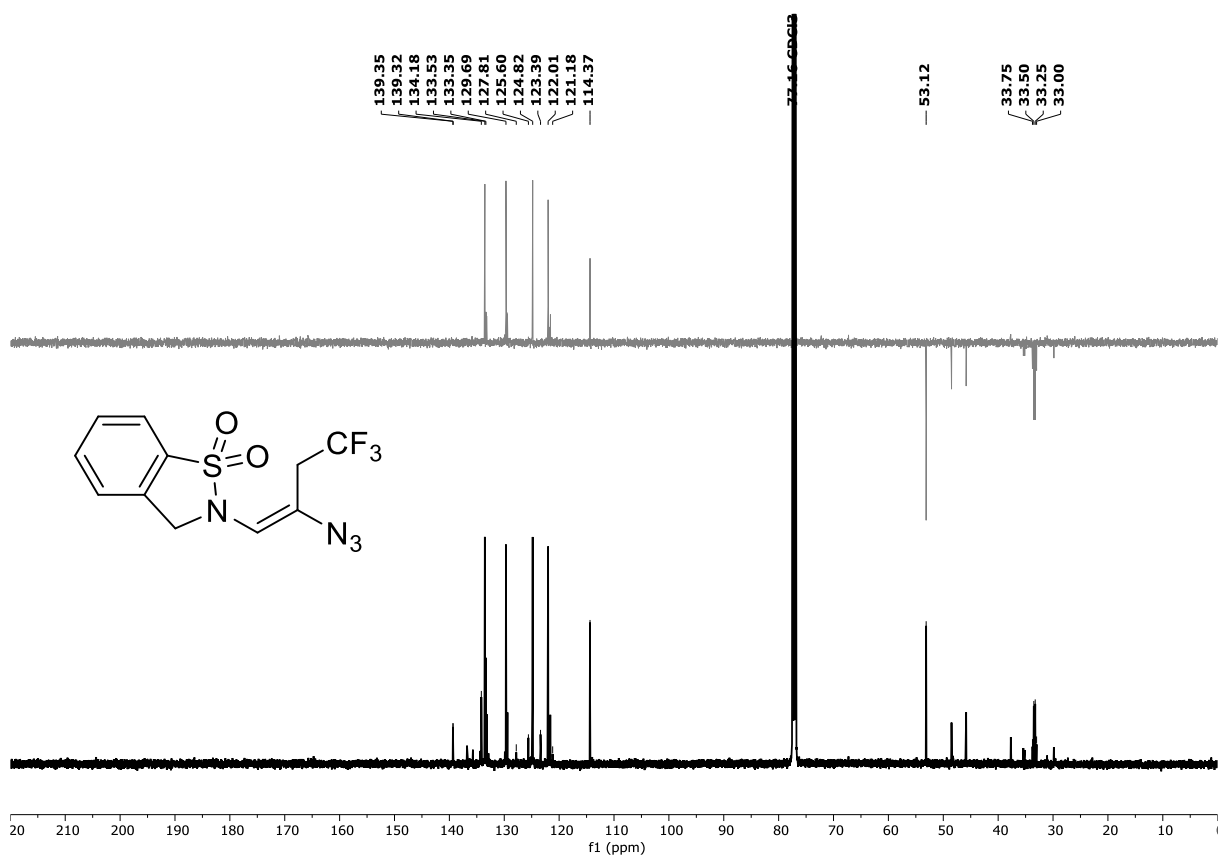

<sup>13</sup>C{<sup>1</sup>H} NMR (CDCl<sub>3</sub>, 126 MHz) of **2j**

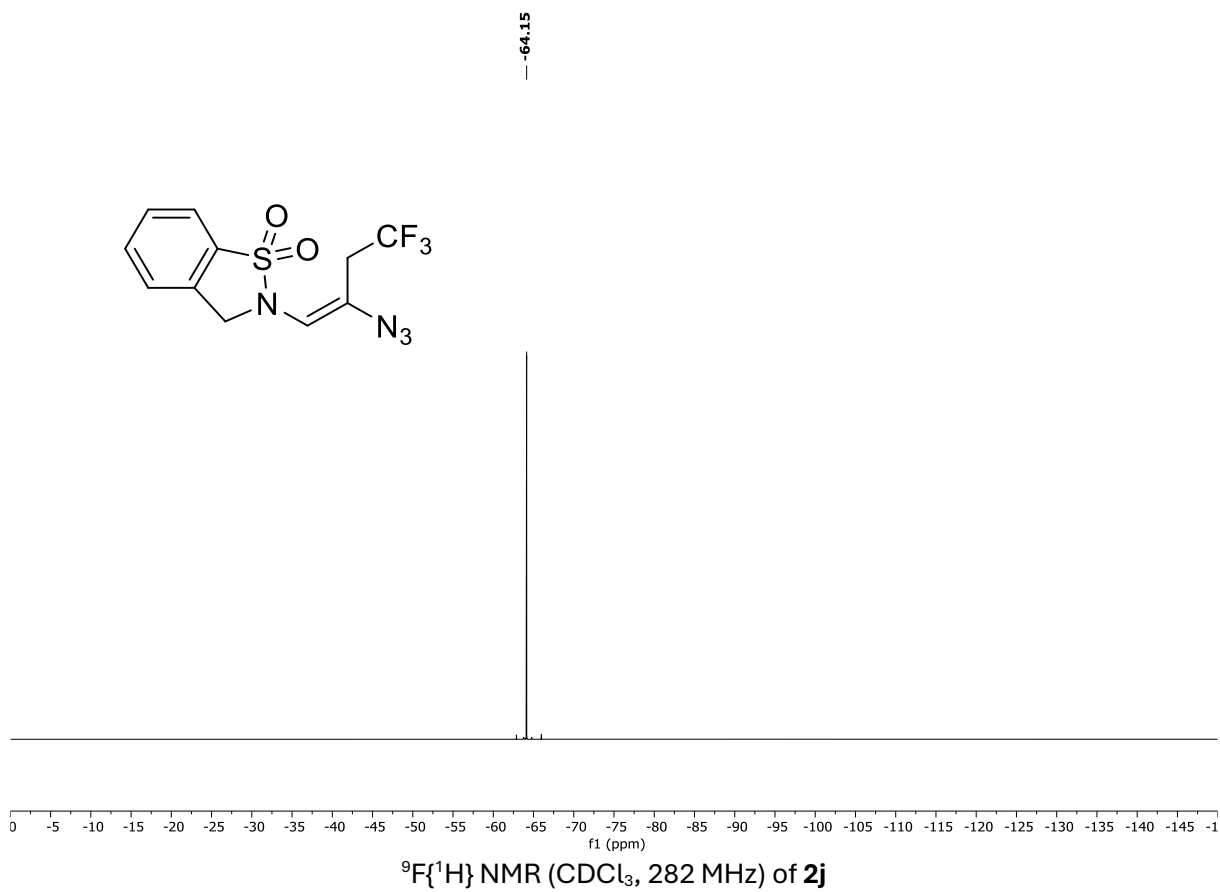

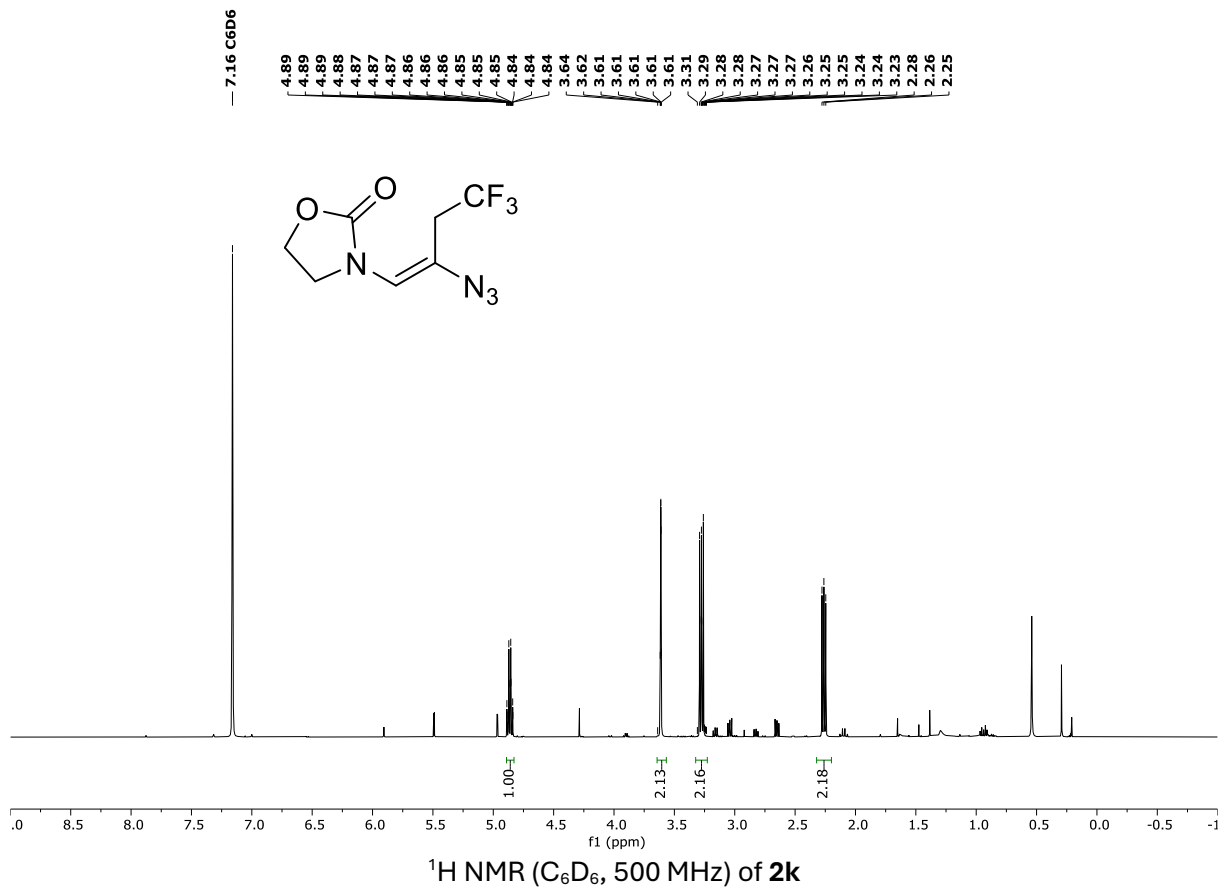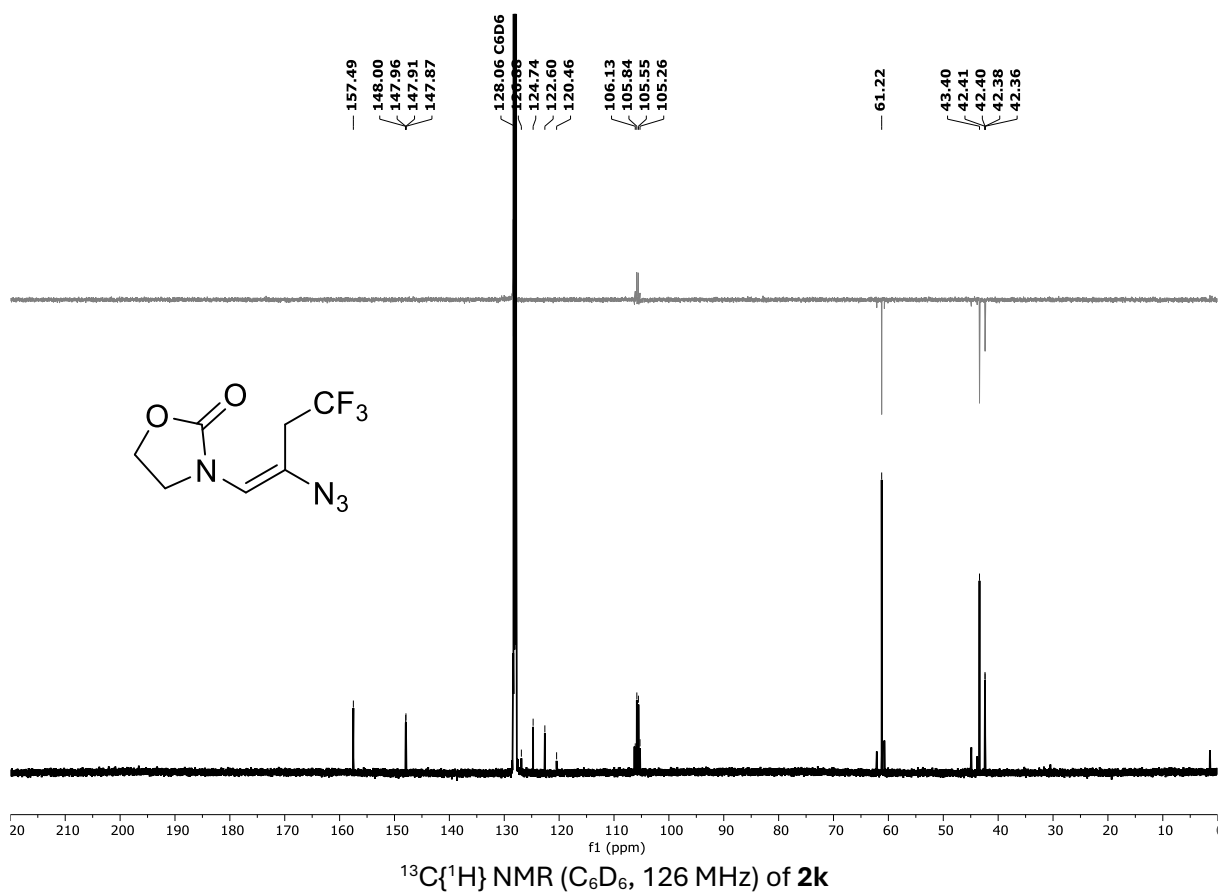



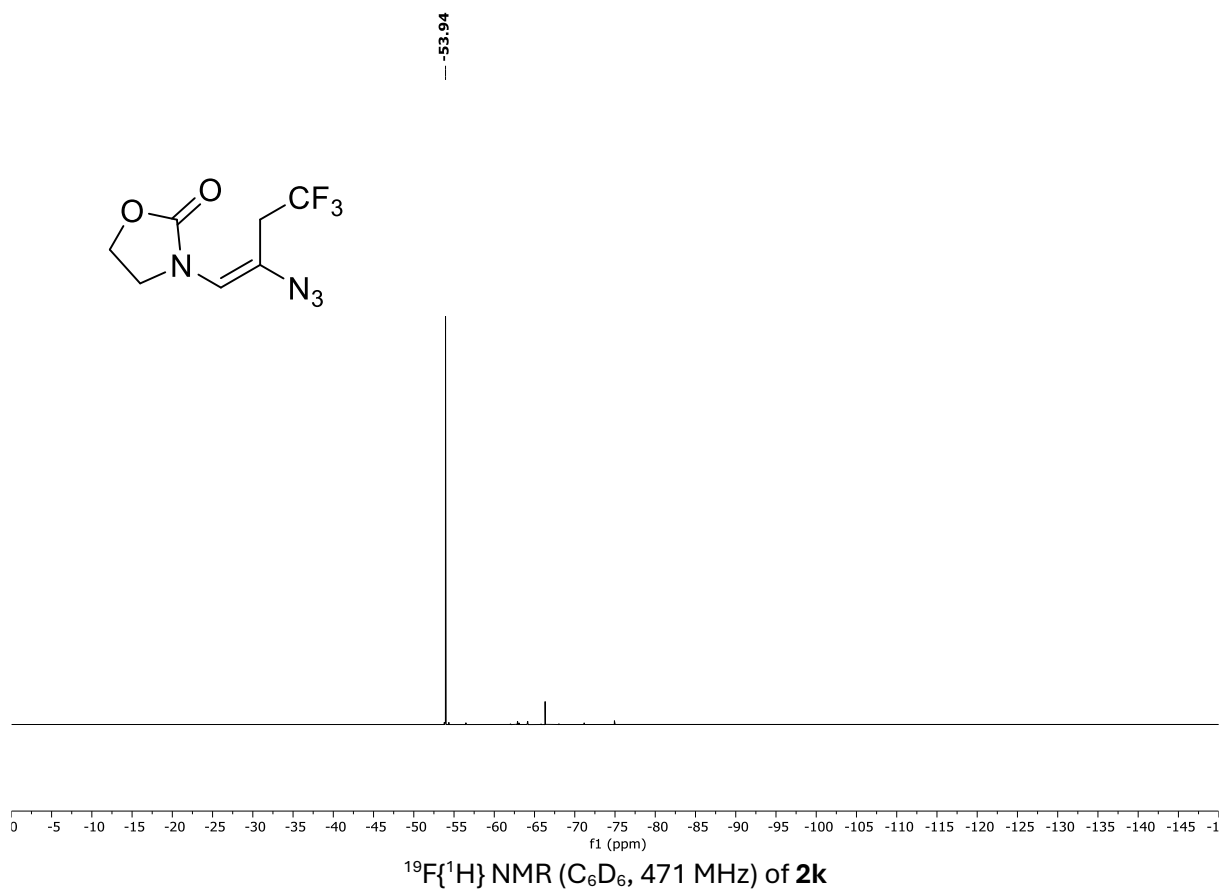

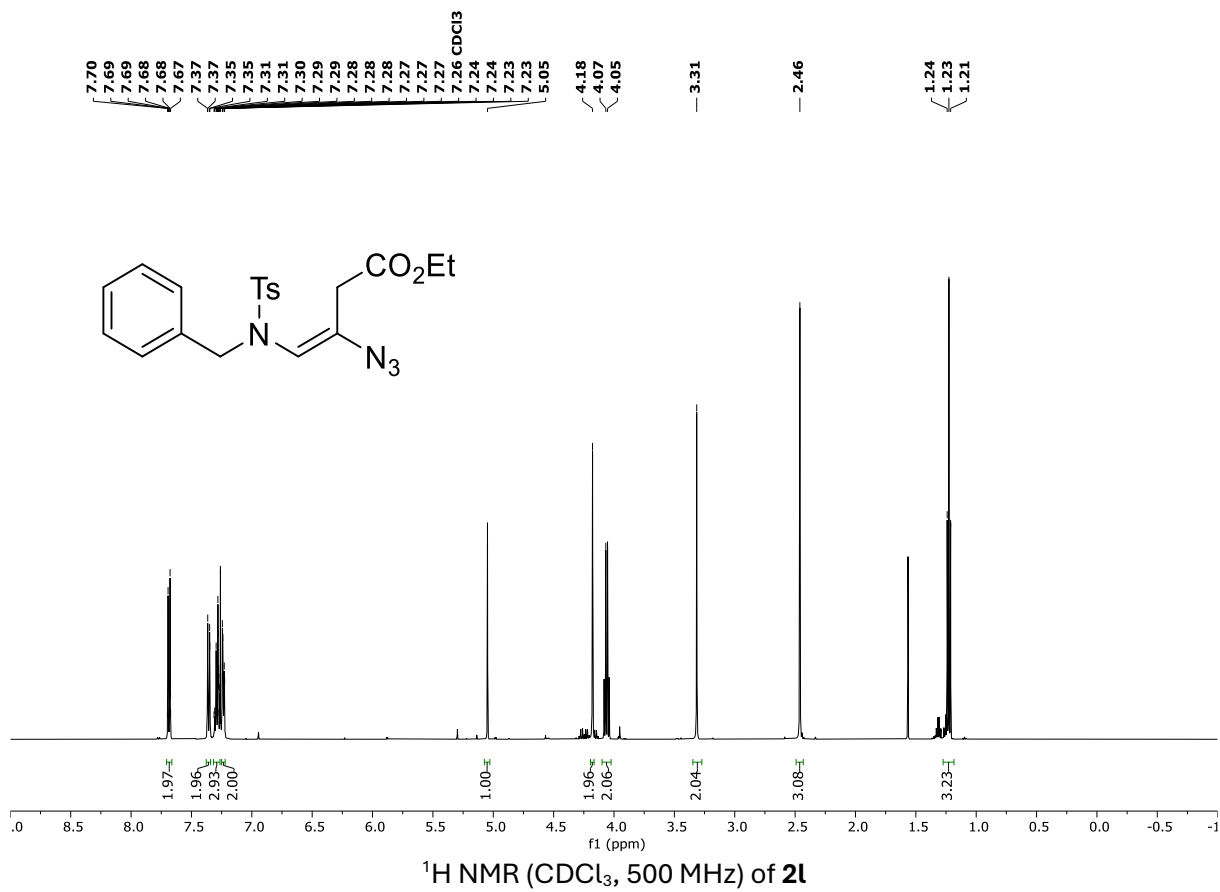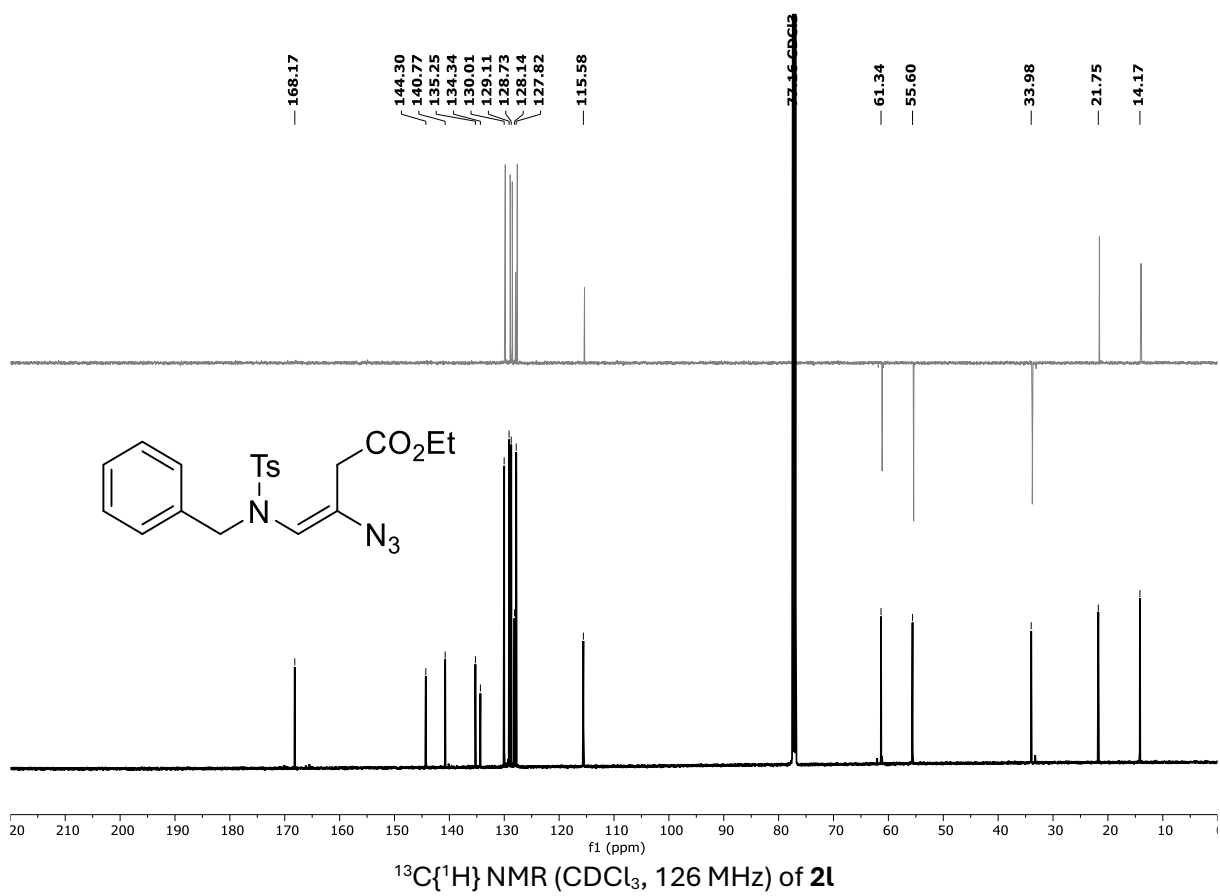

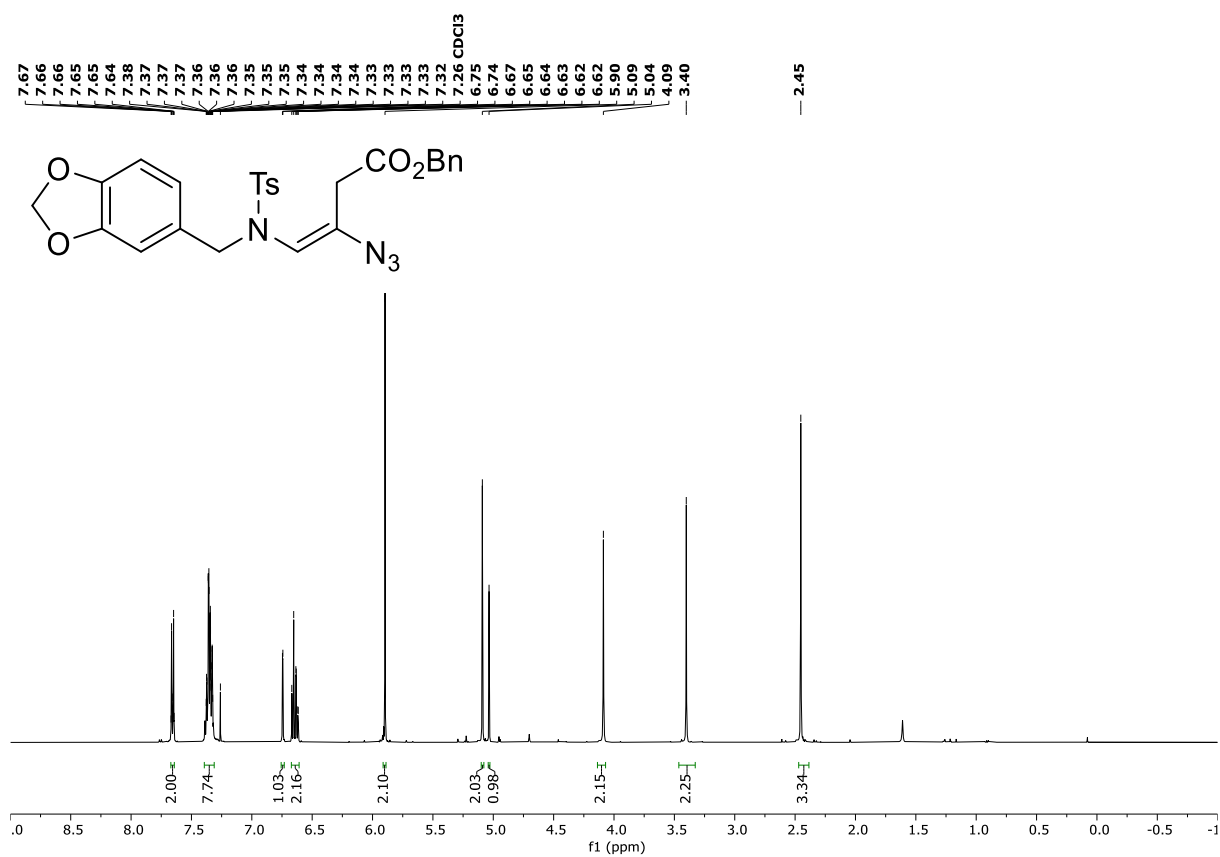

<sup>1</sup>H NMR (CDCl<sub>3</sub>, 500 MHz) of **2m**

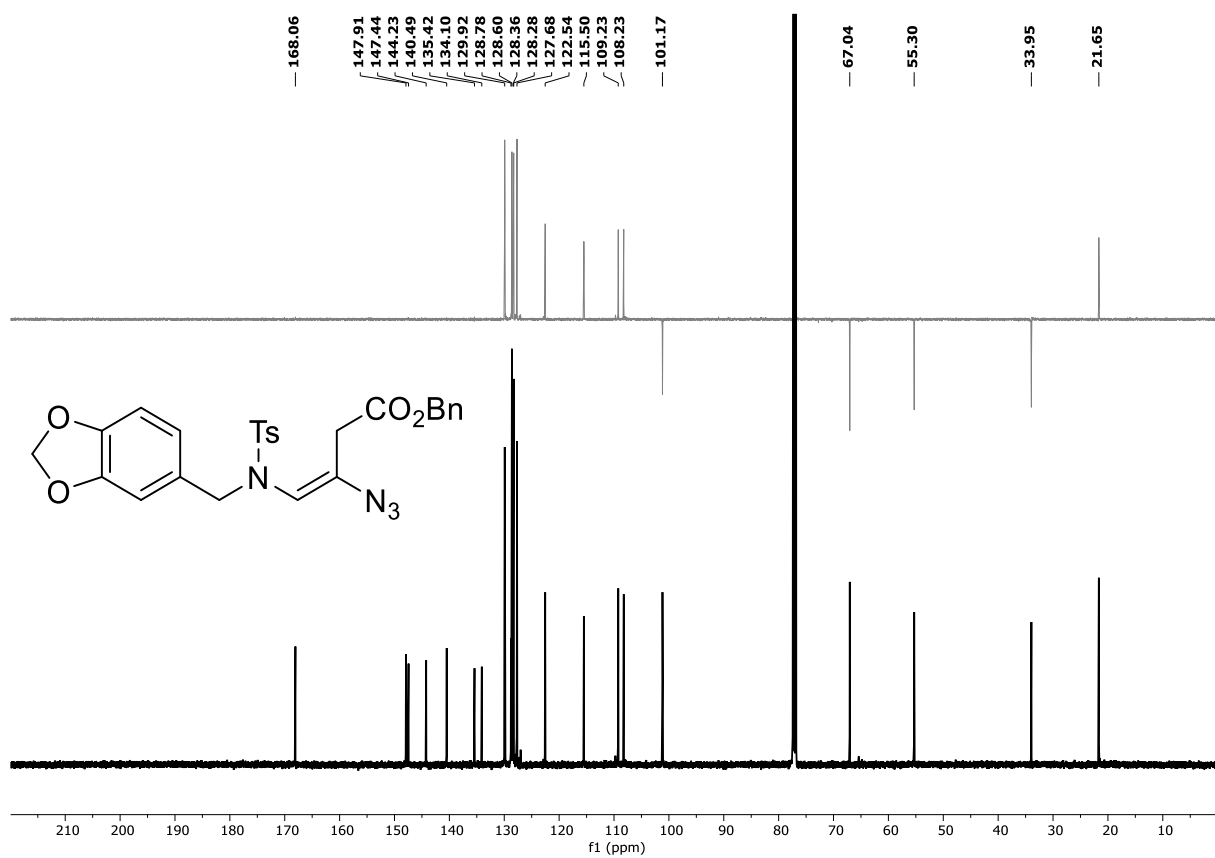

<sup>13</sup>C{<sup>1</sup>H} NMR (CDCl<sub>3</sub>, 126 MHz) of **2m**

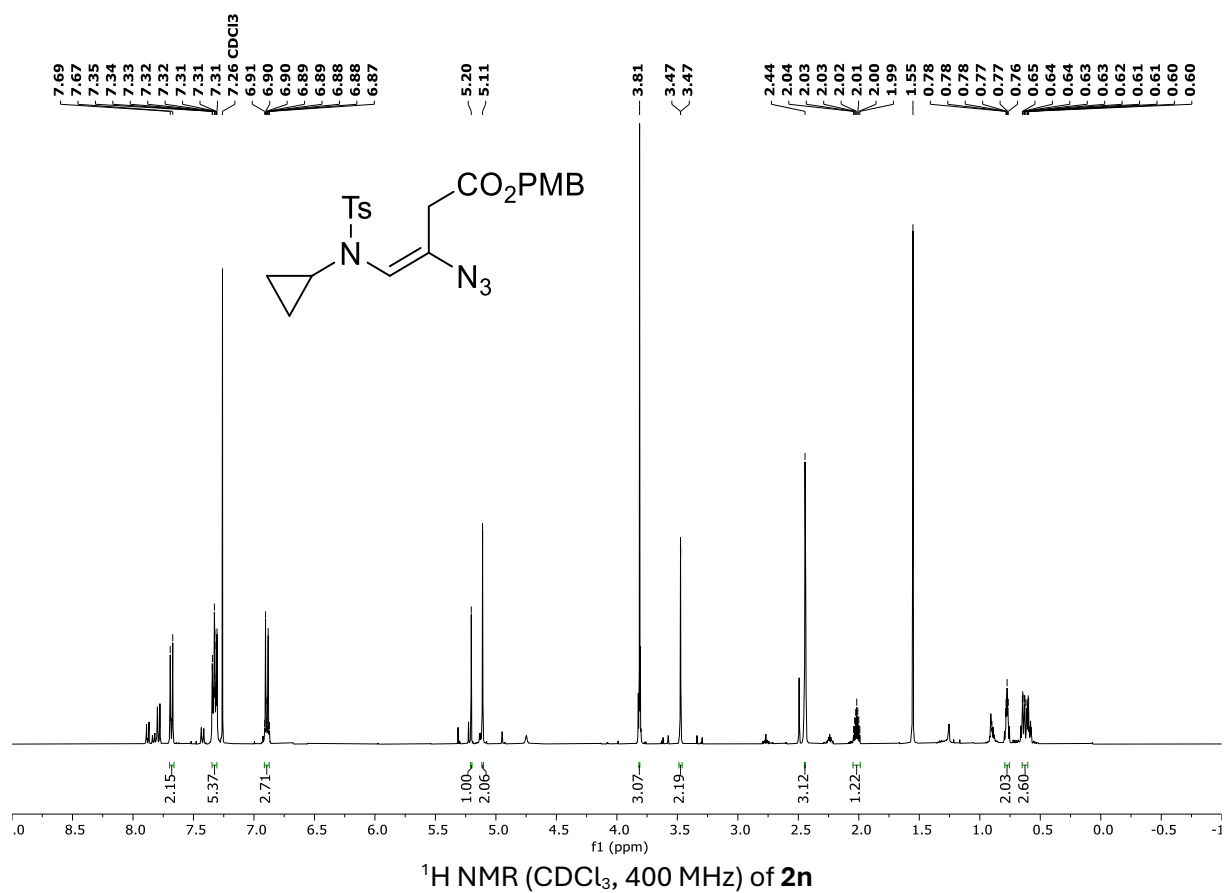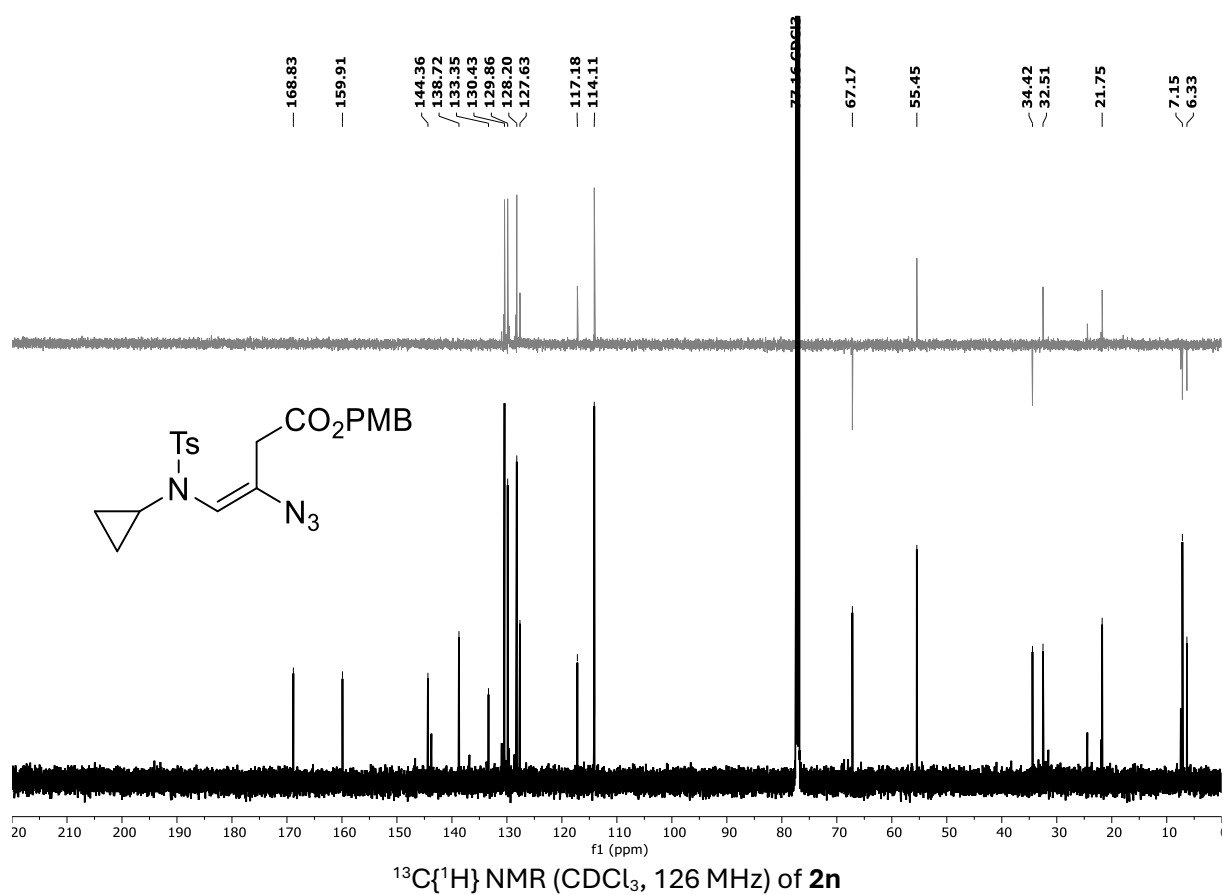

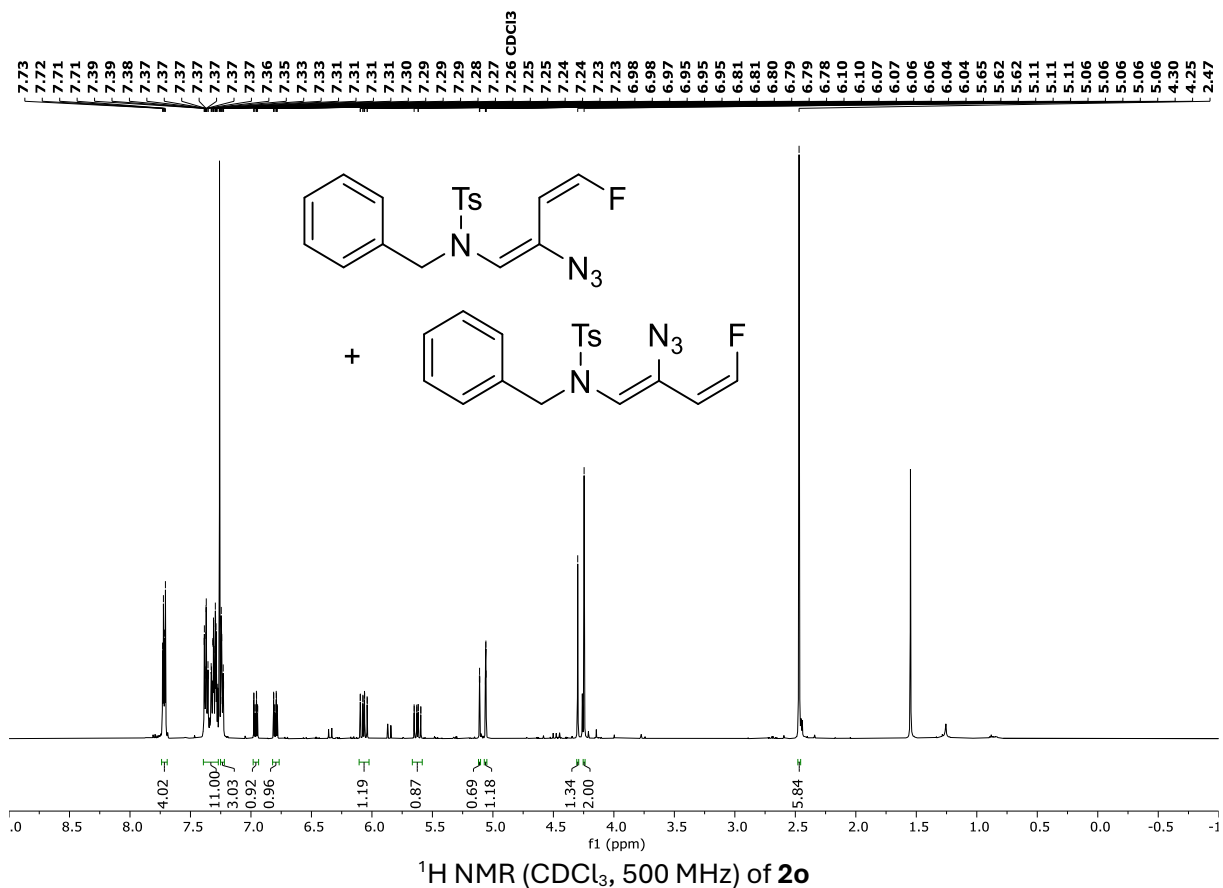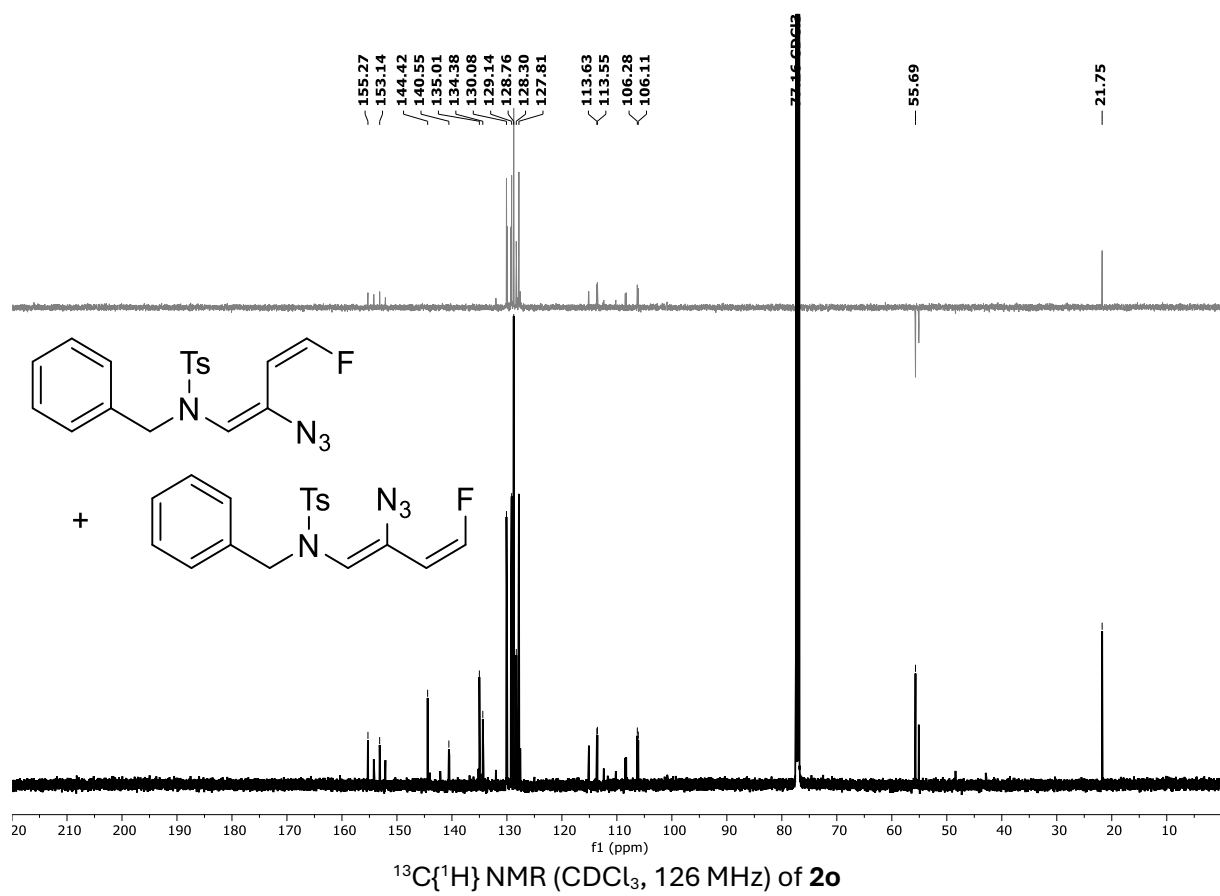

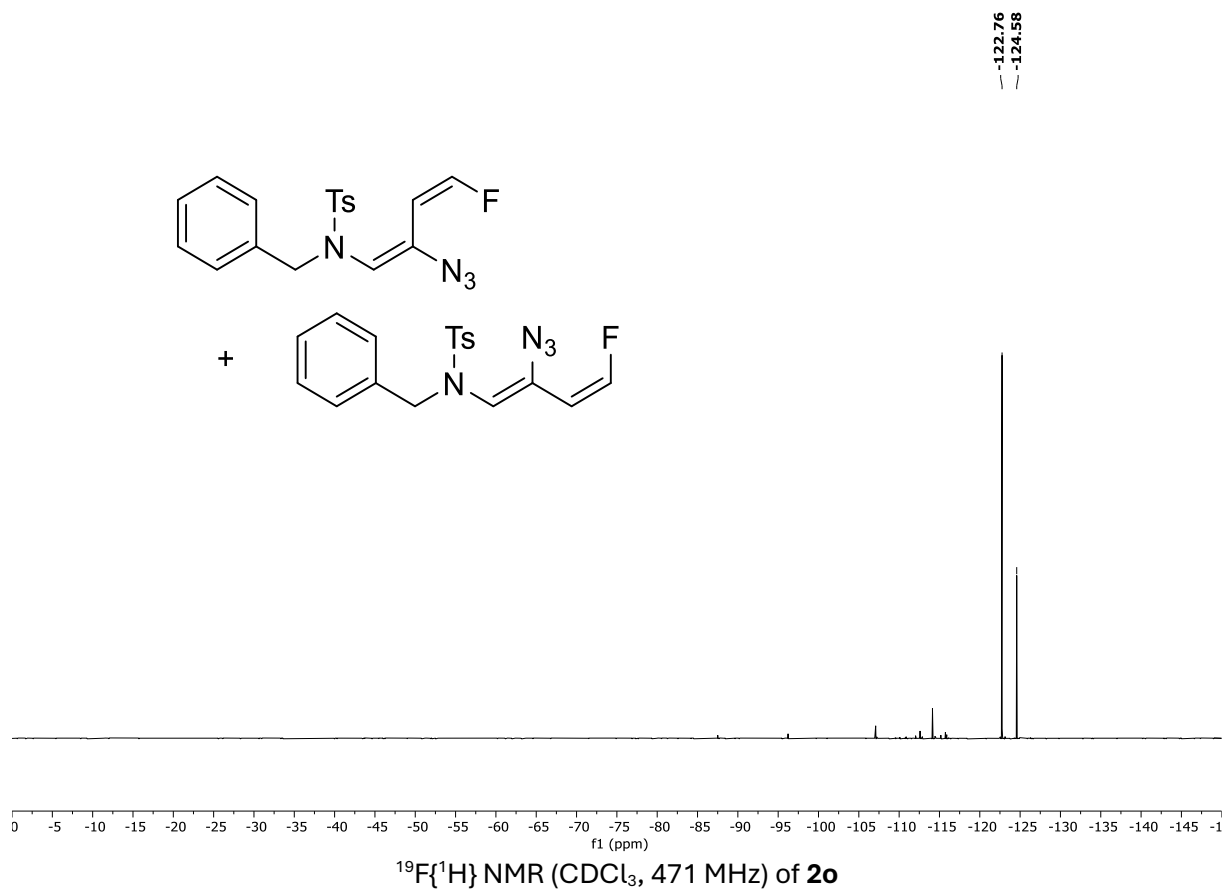

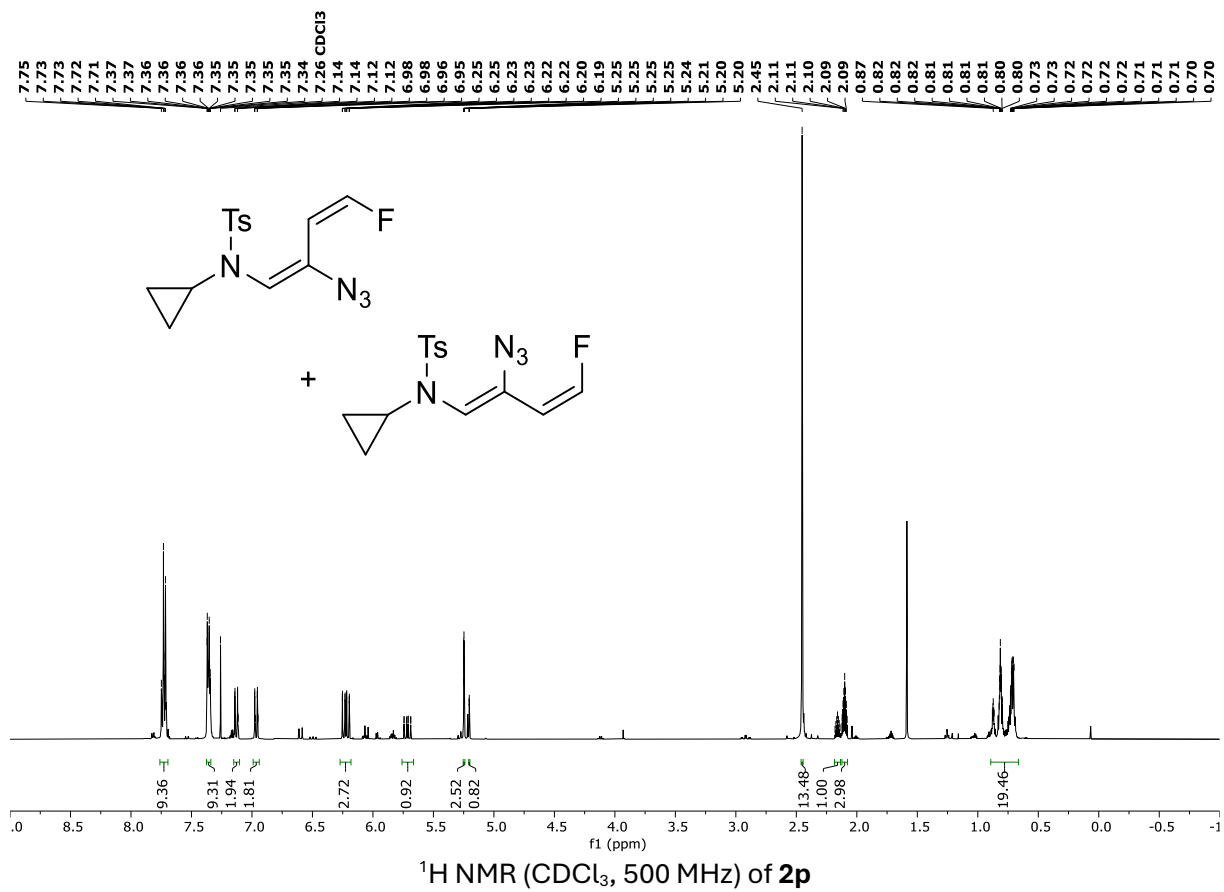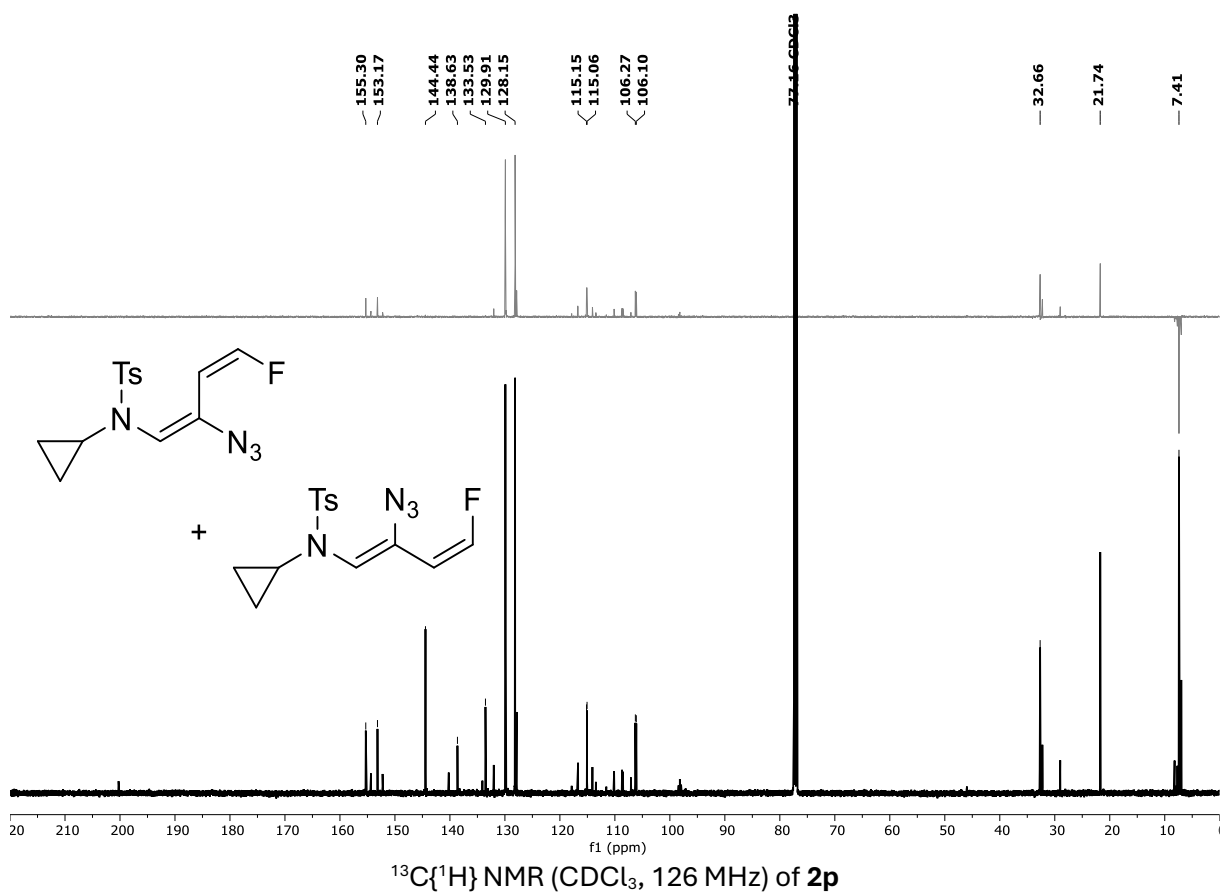

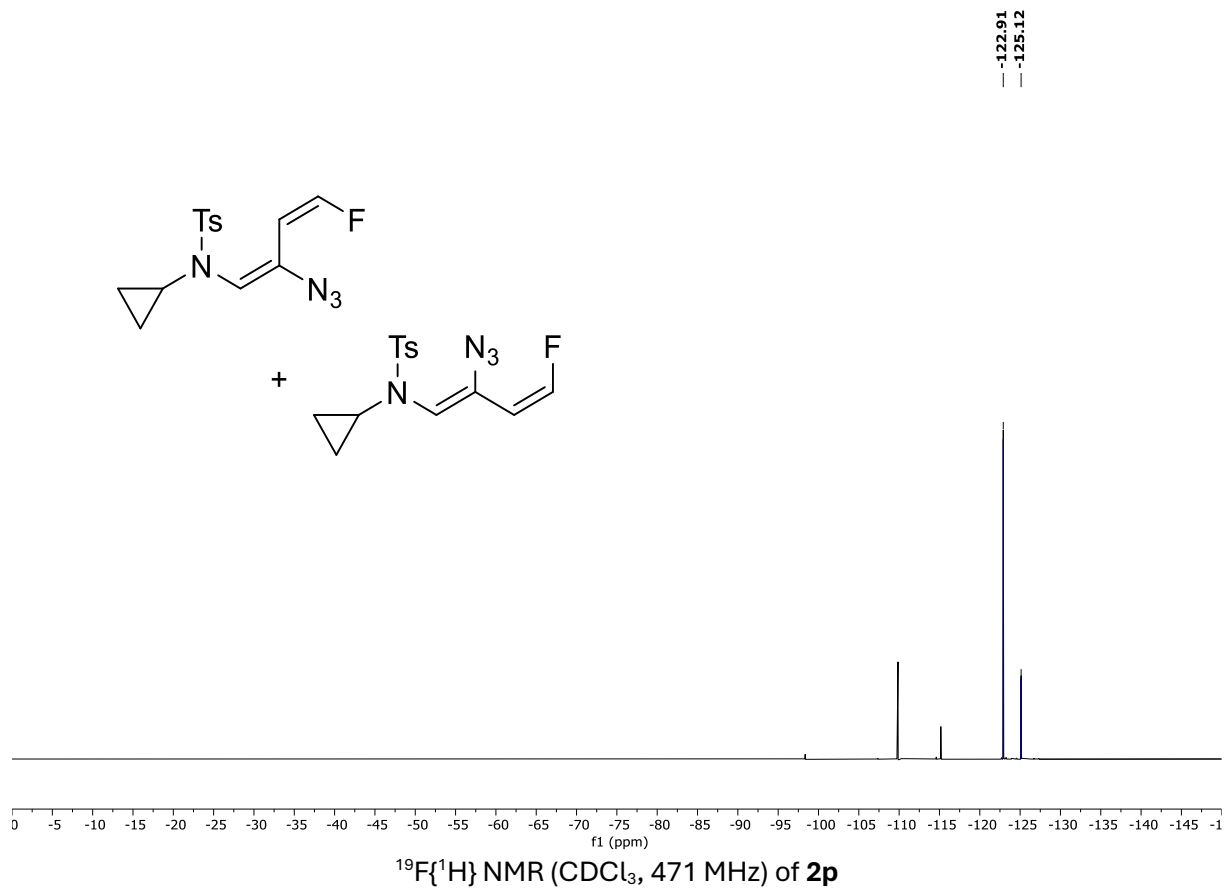



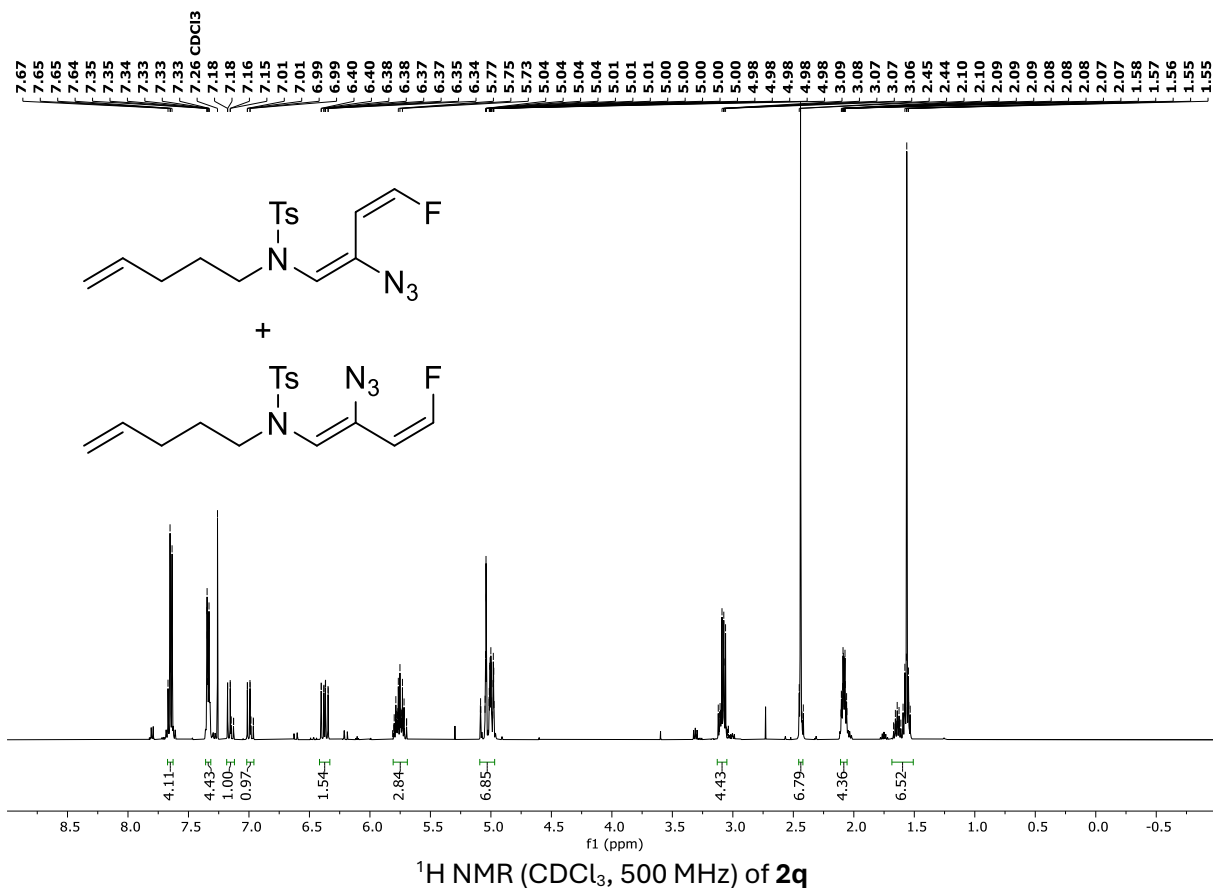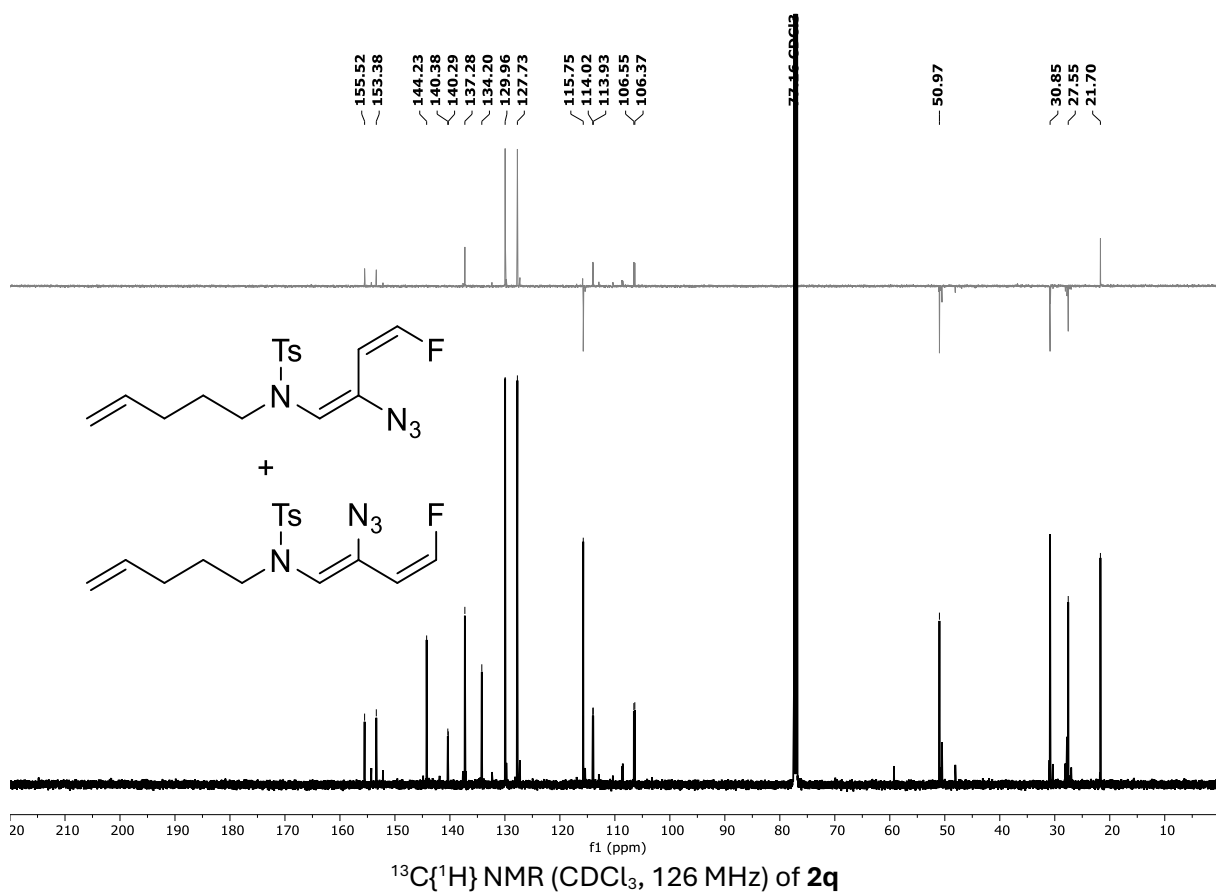

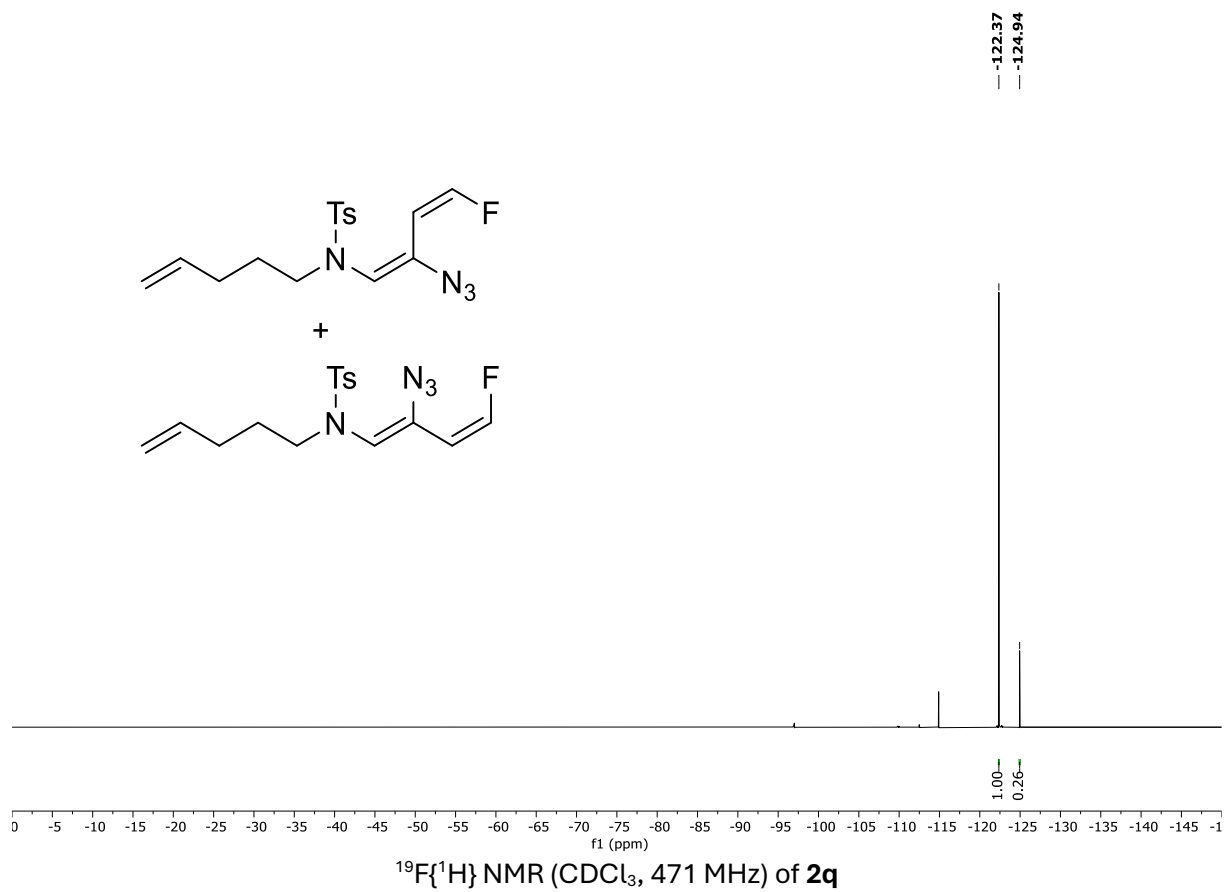

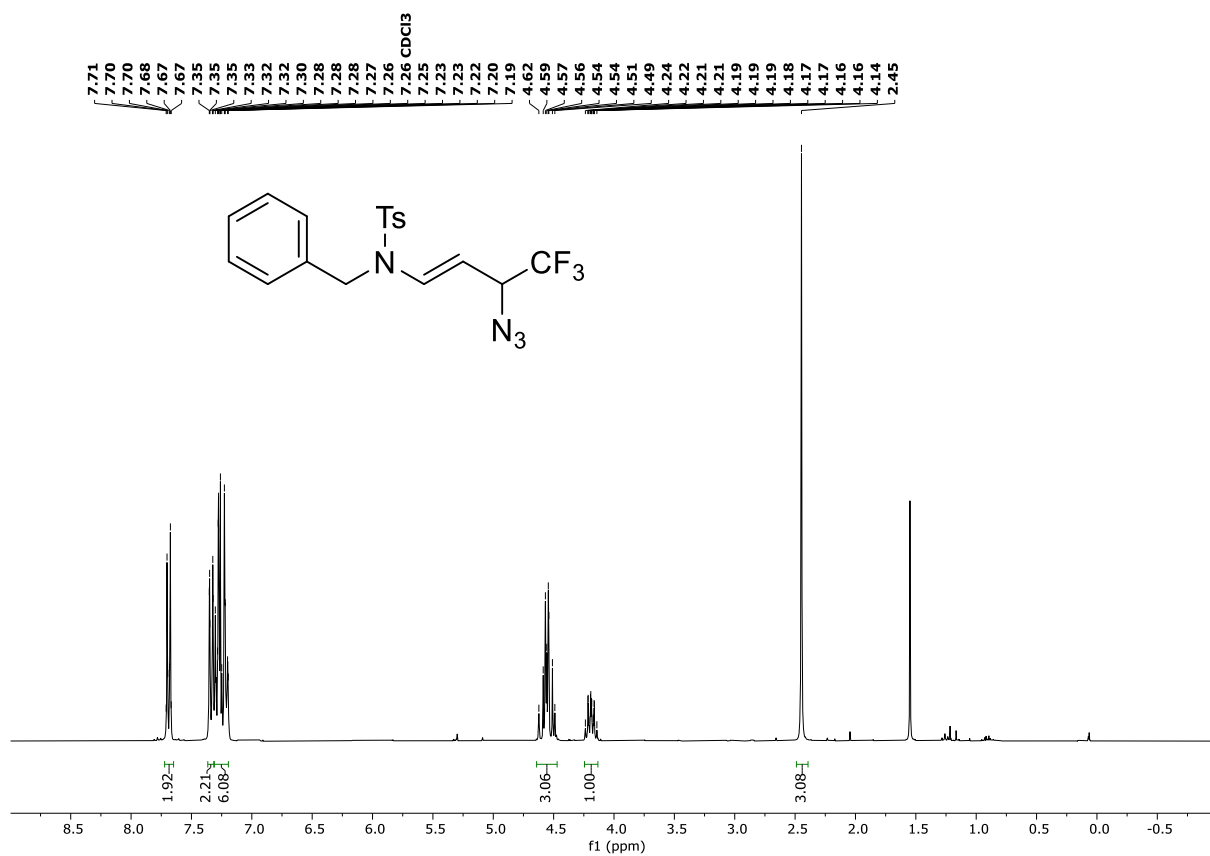

<sup>1</sup>H NMR (CDCl<sub>3</sub>, 300 MHz) of **3a**

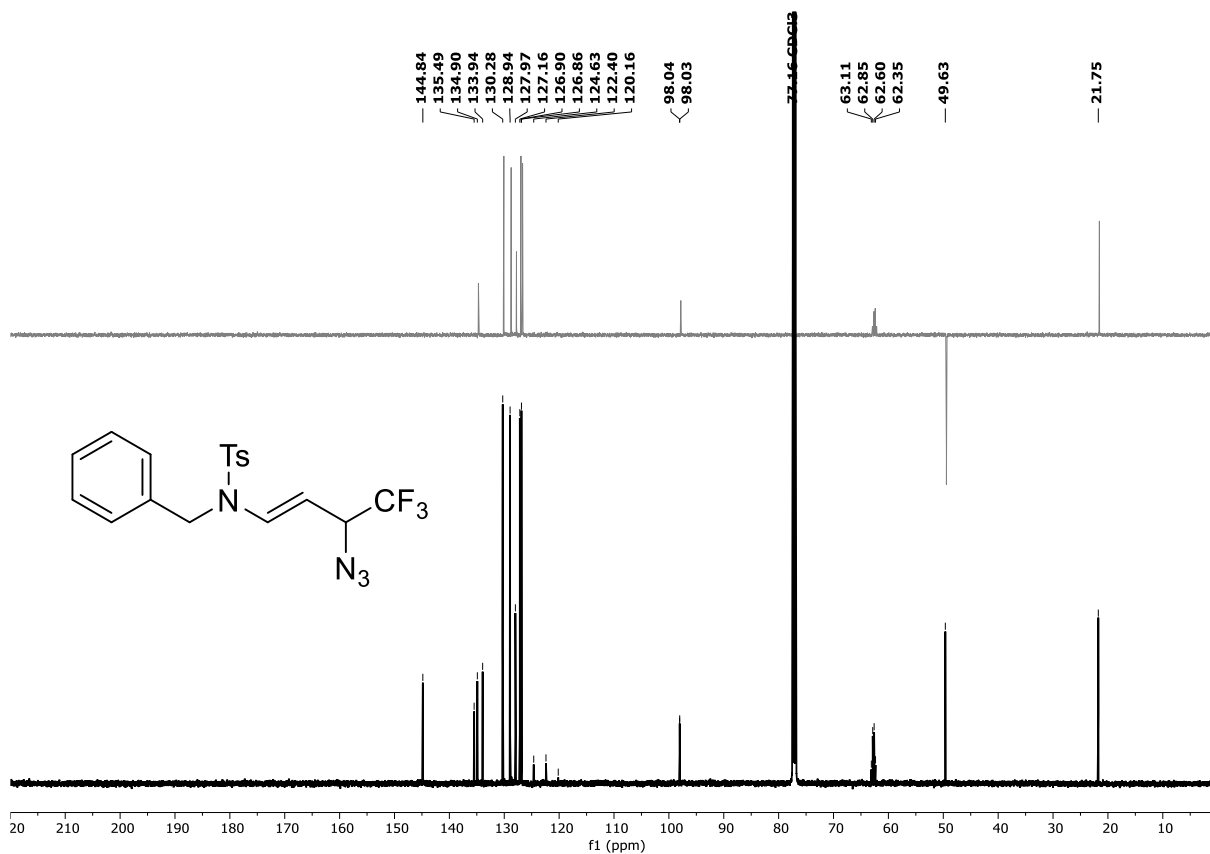

<sup>13</sup>C{<sup>1</sup>H} NMR (CDCl<sub>3</sub>, 126 MHz) of **3a**

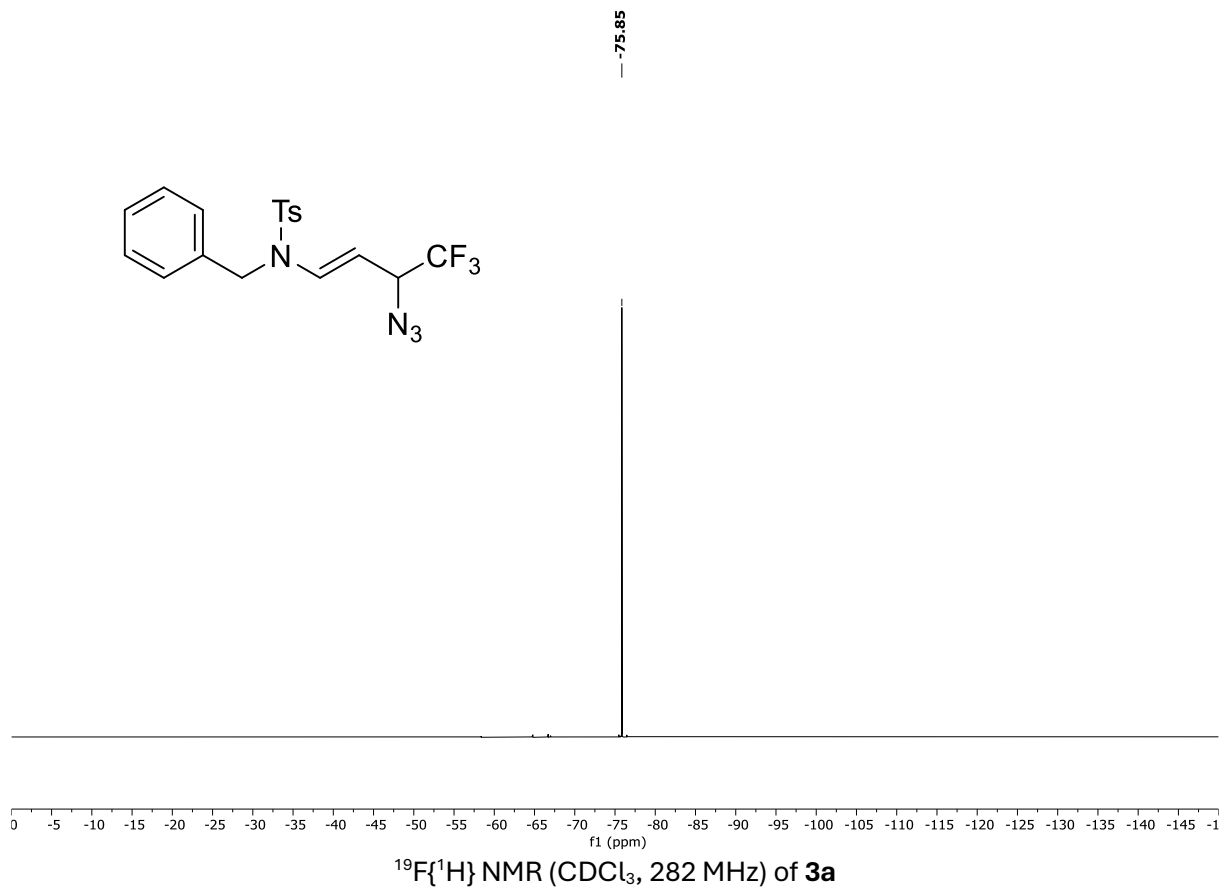

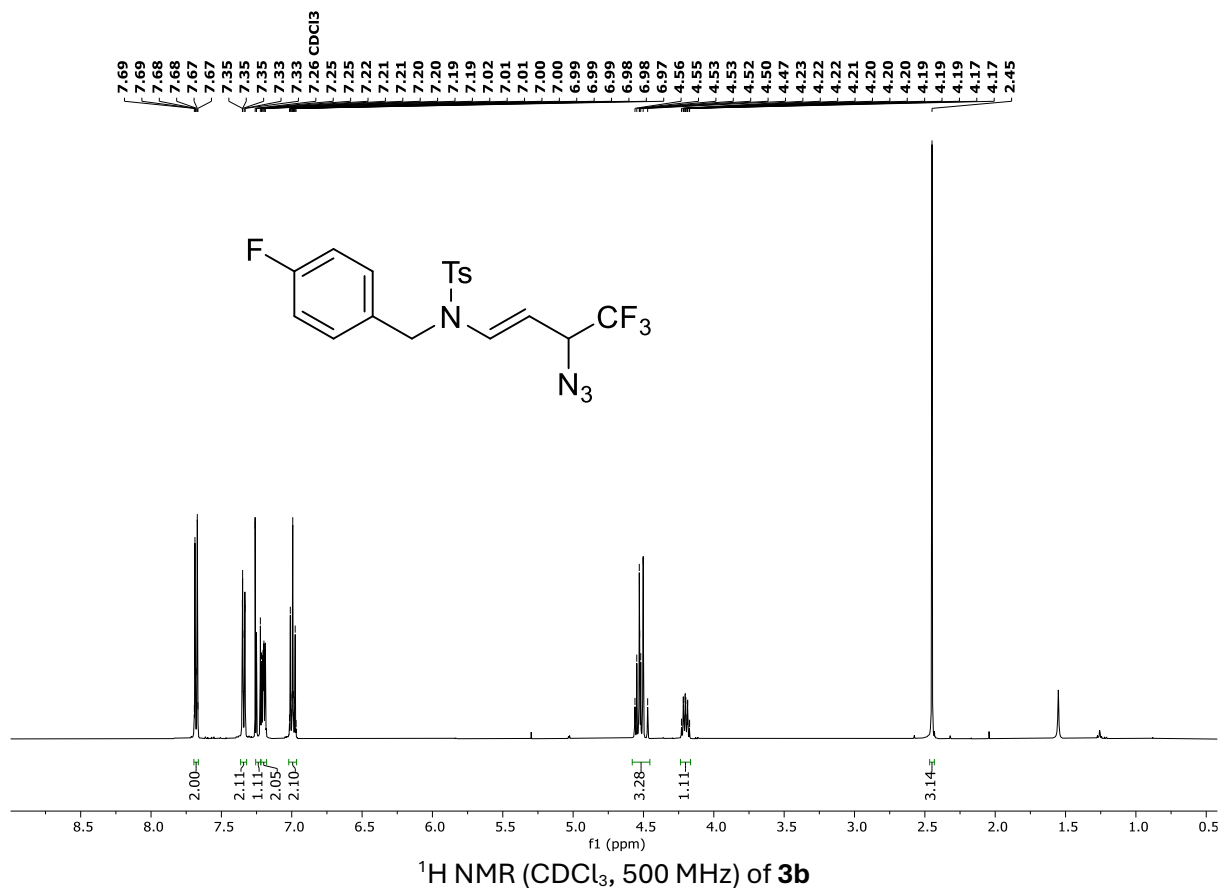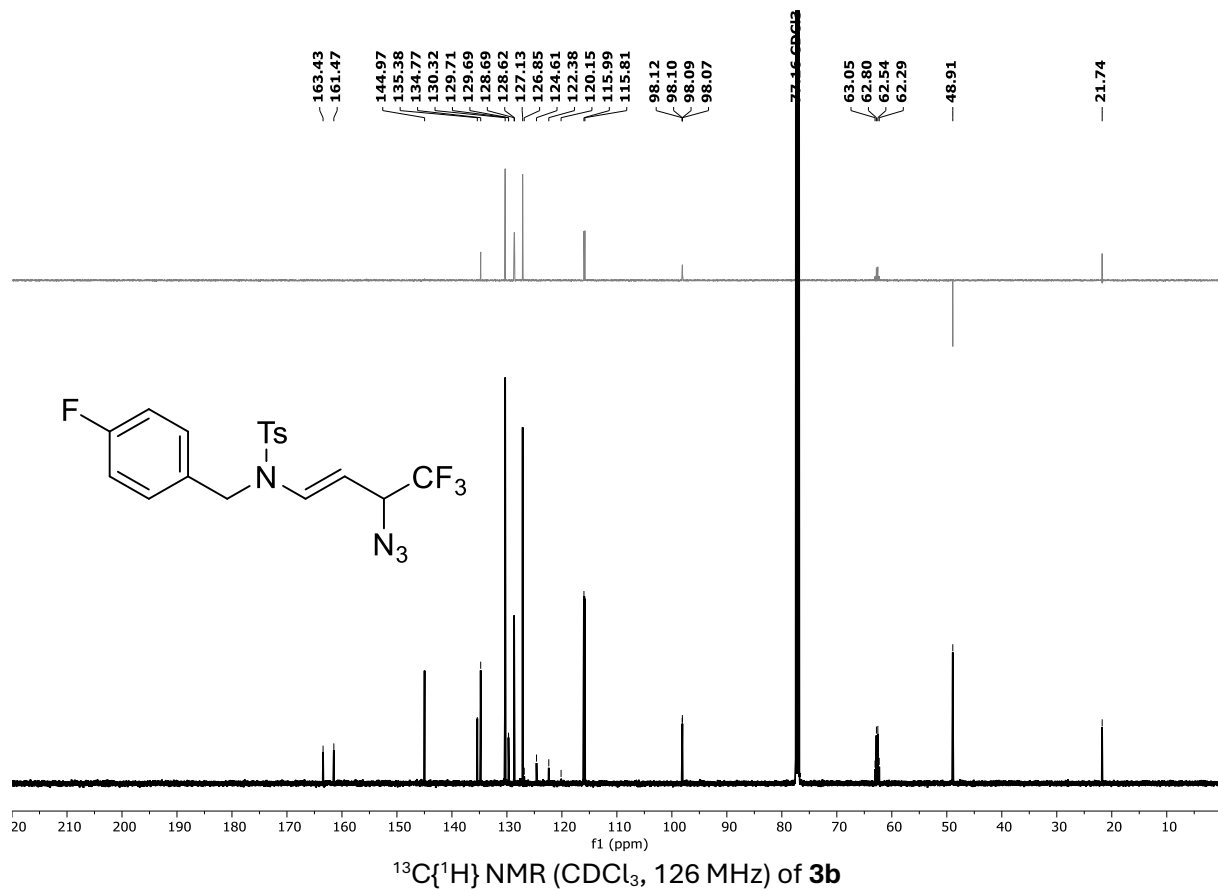

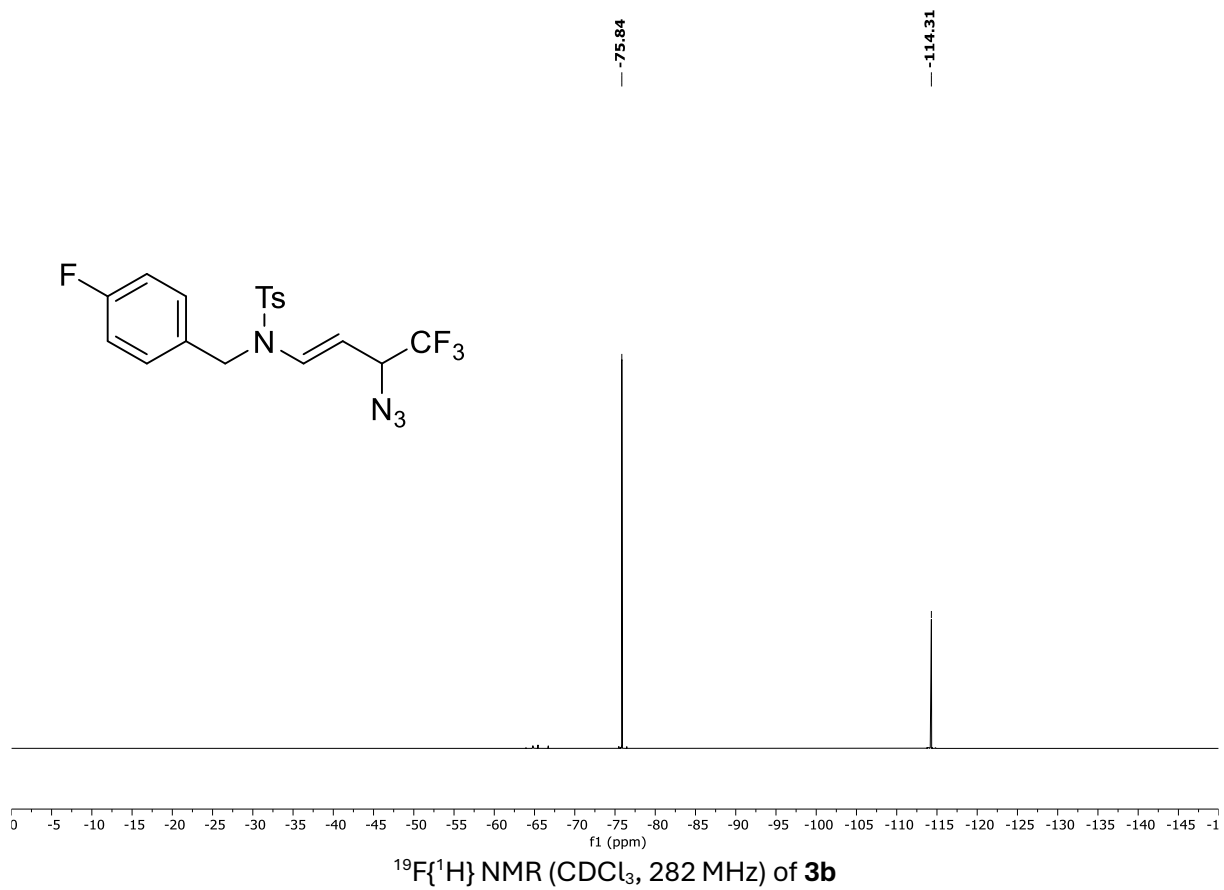

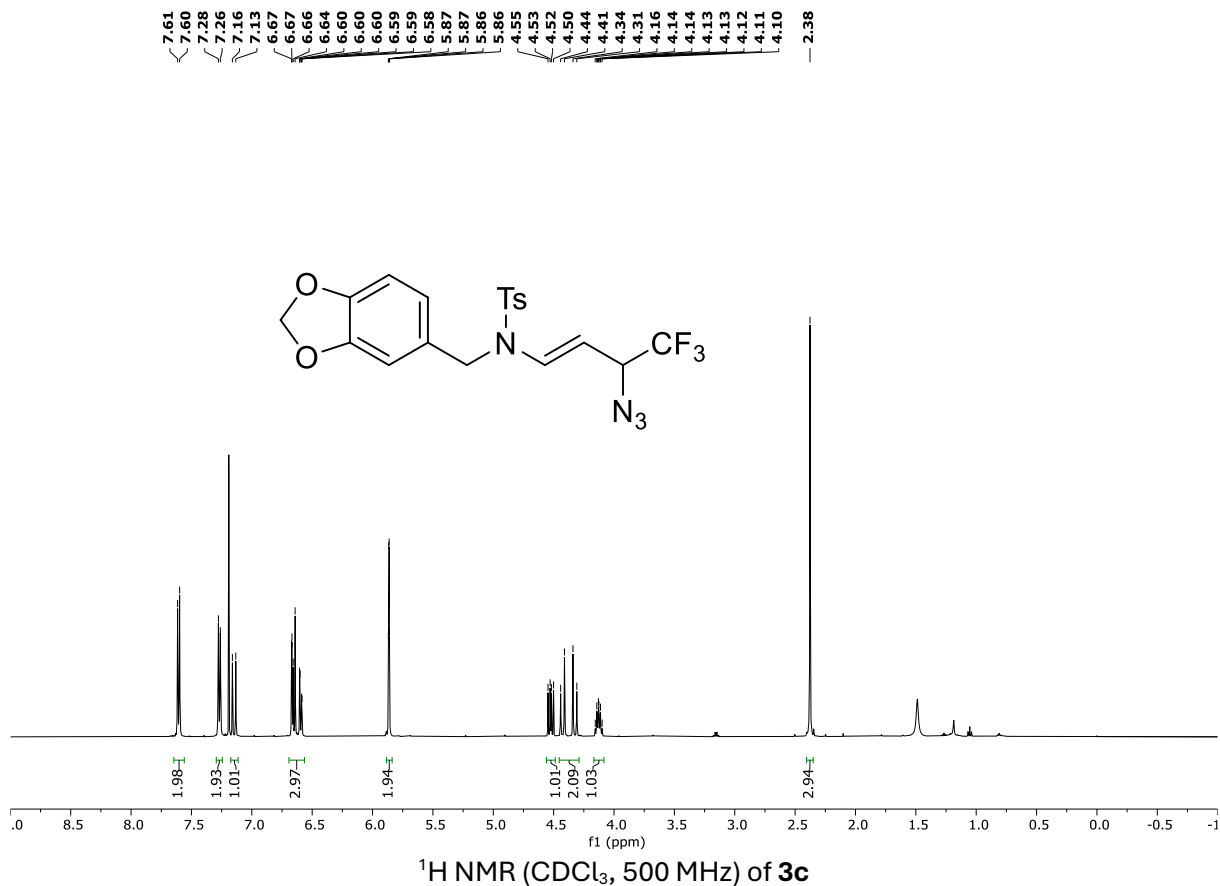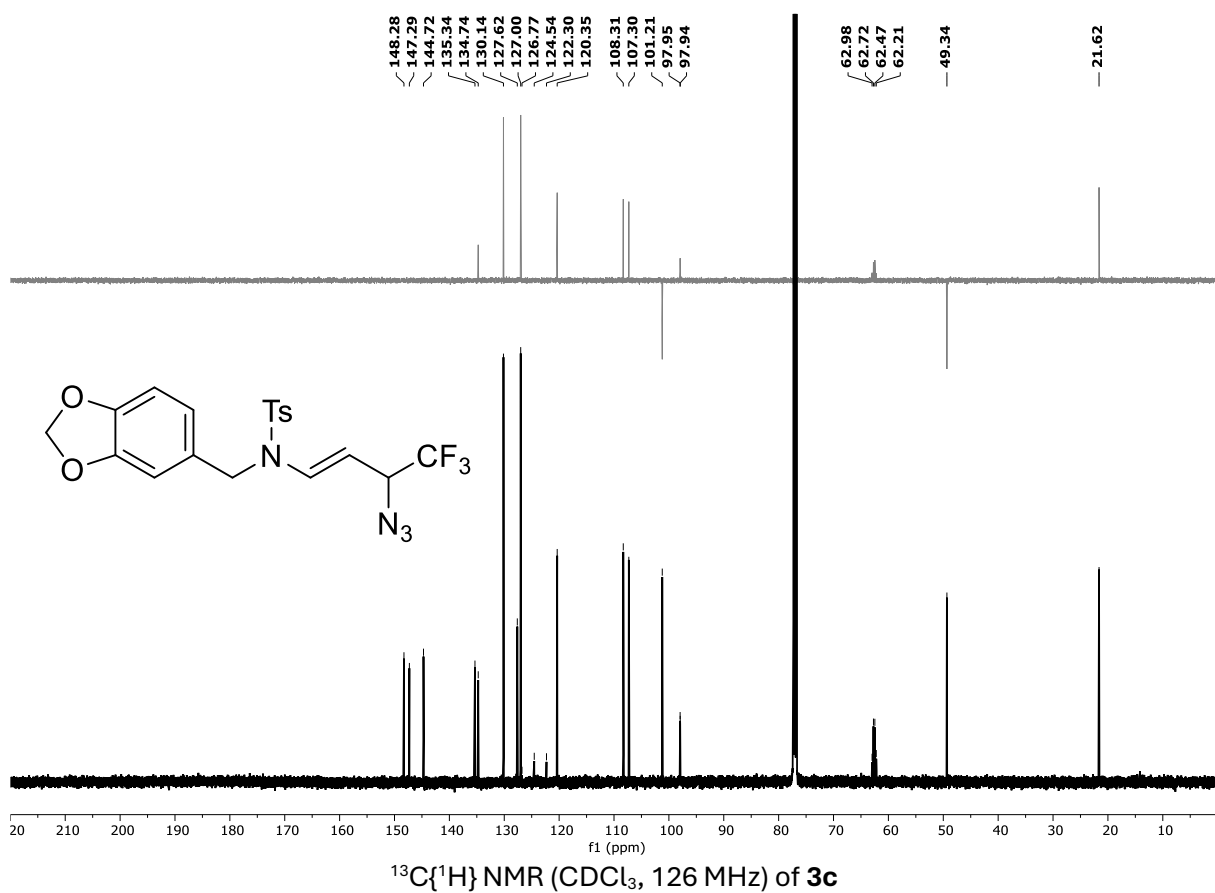

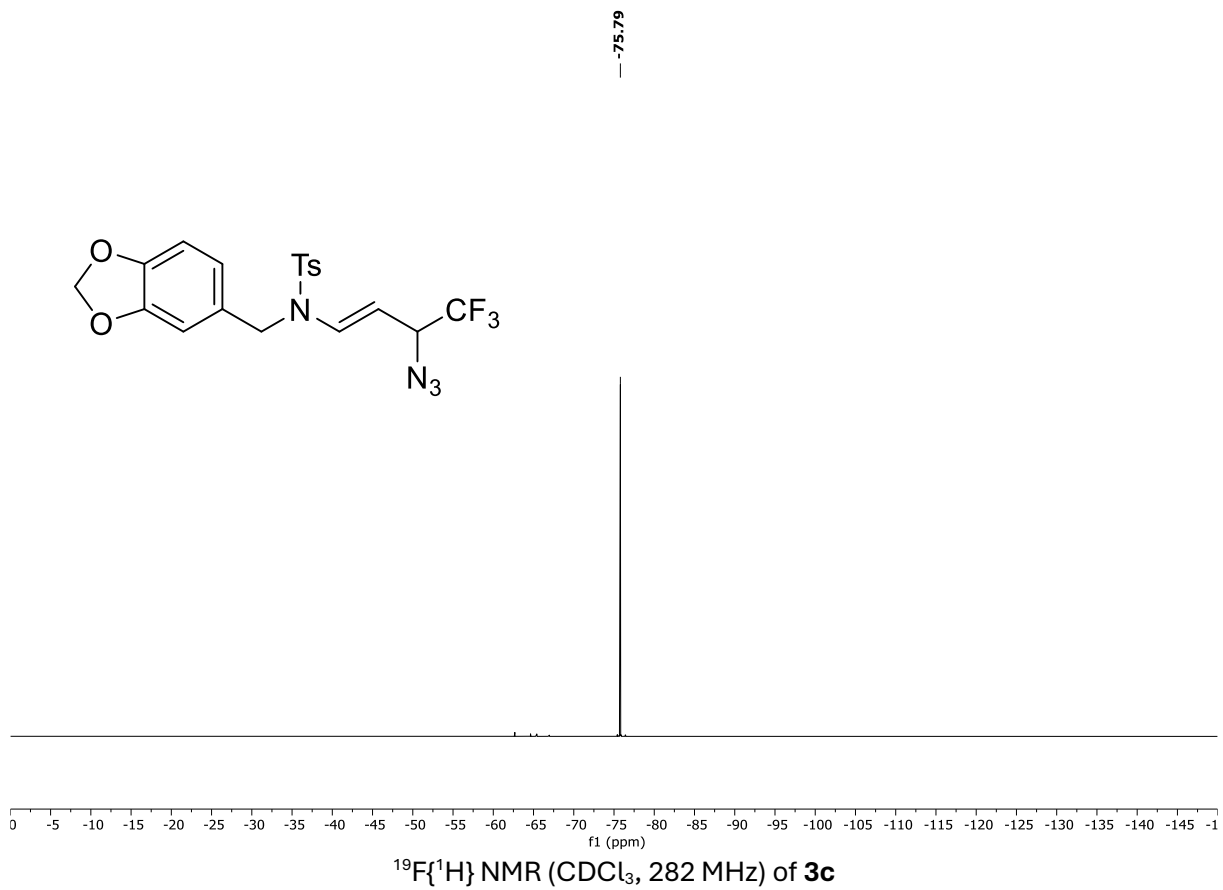



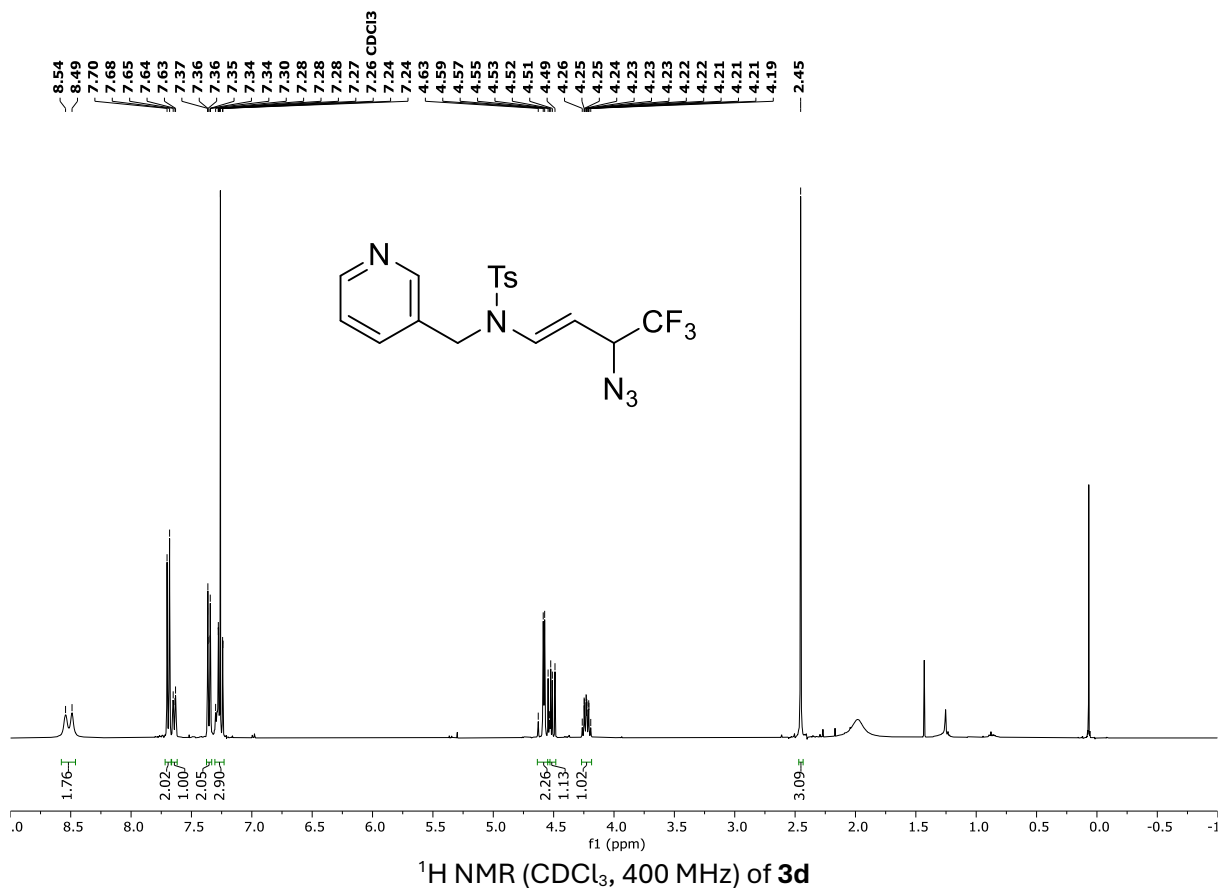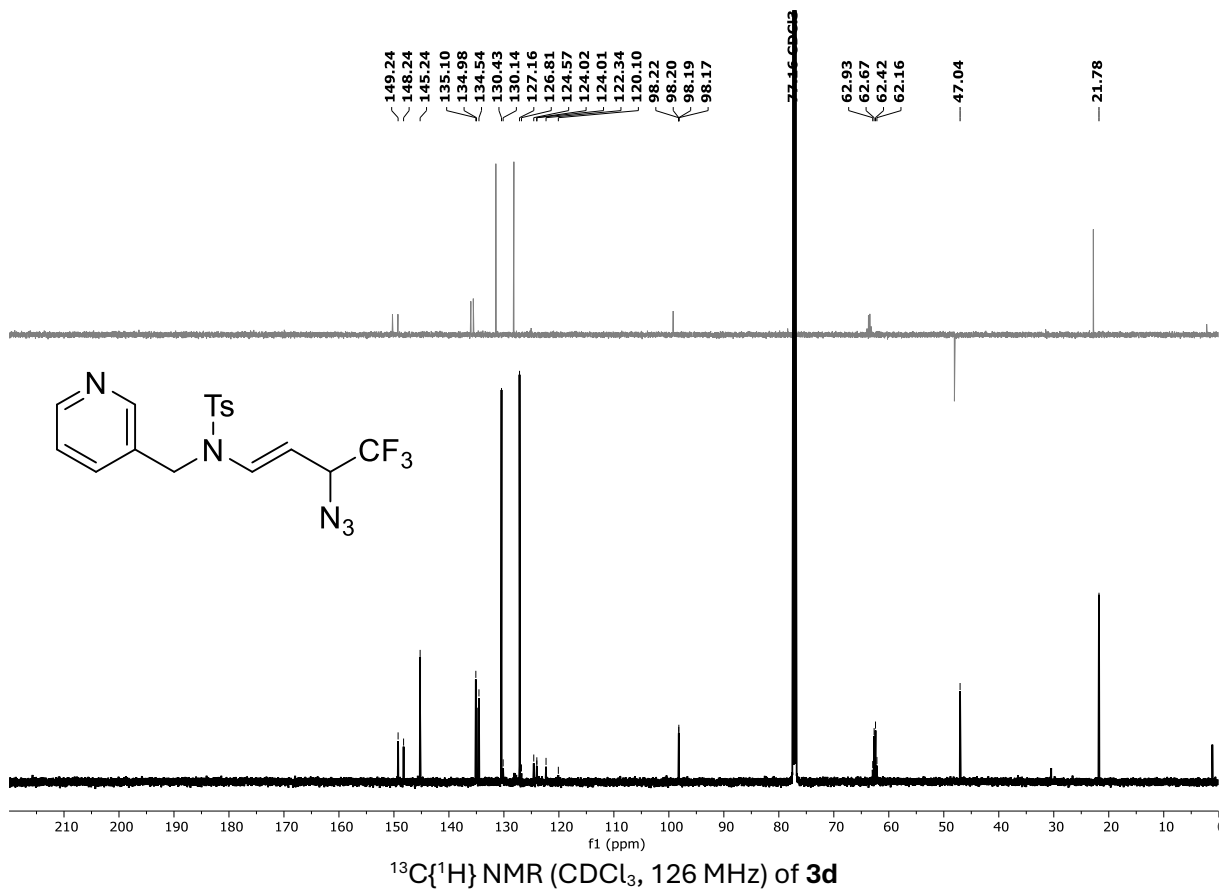

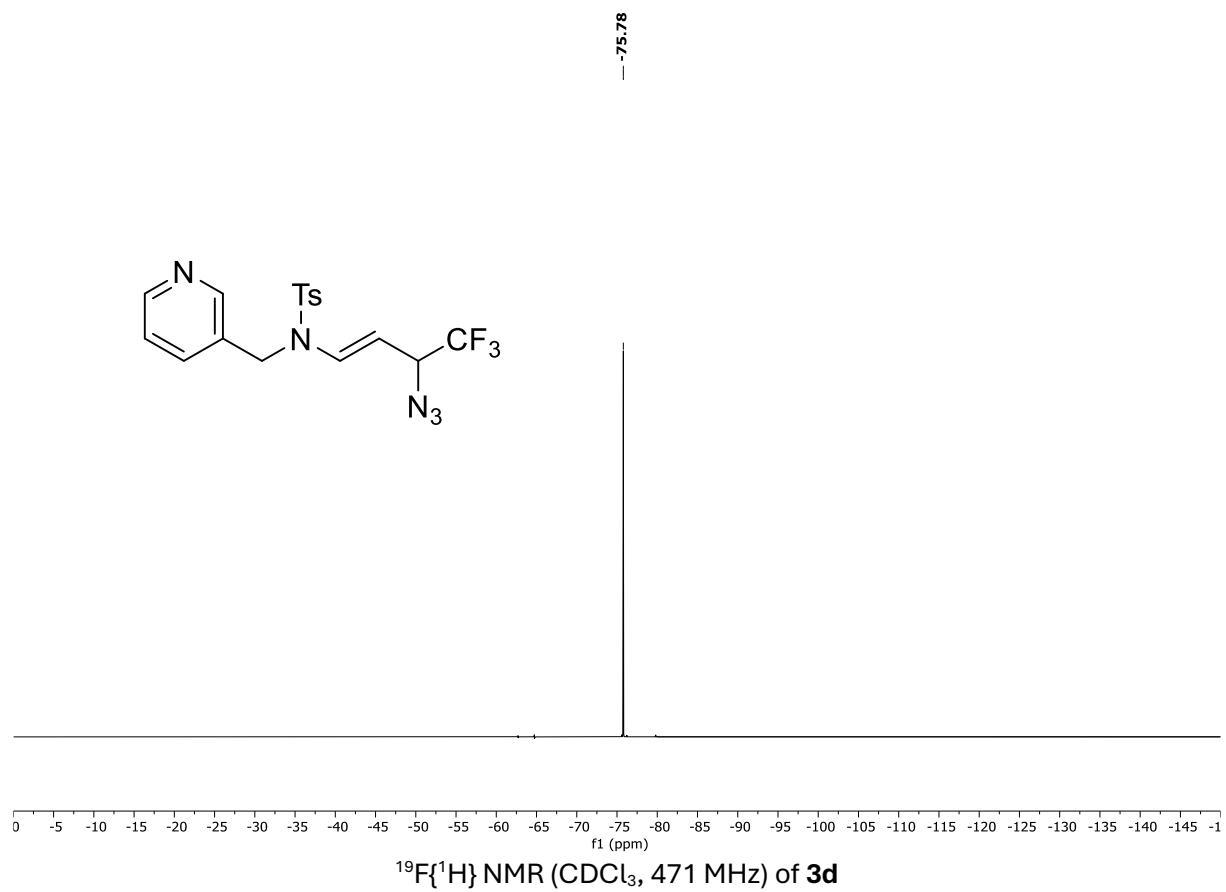

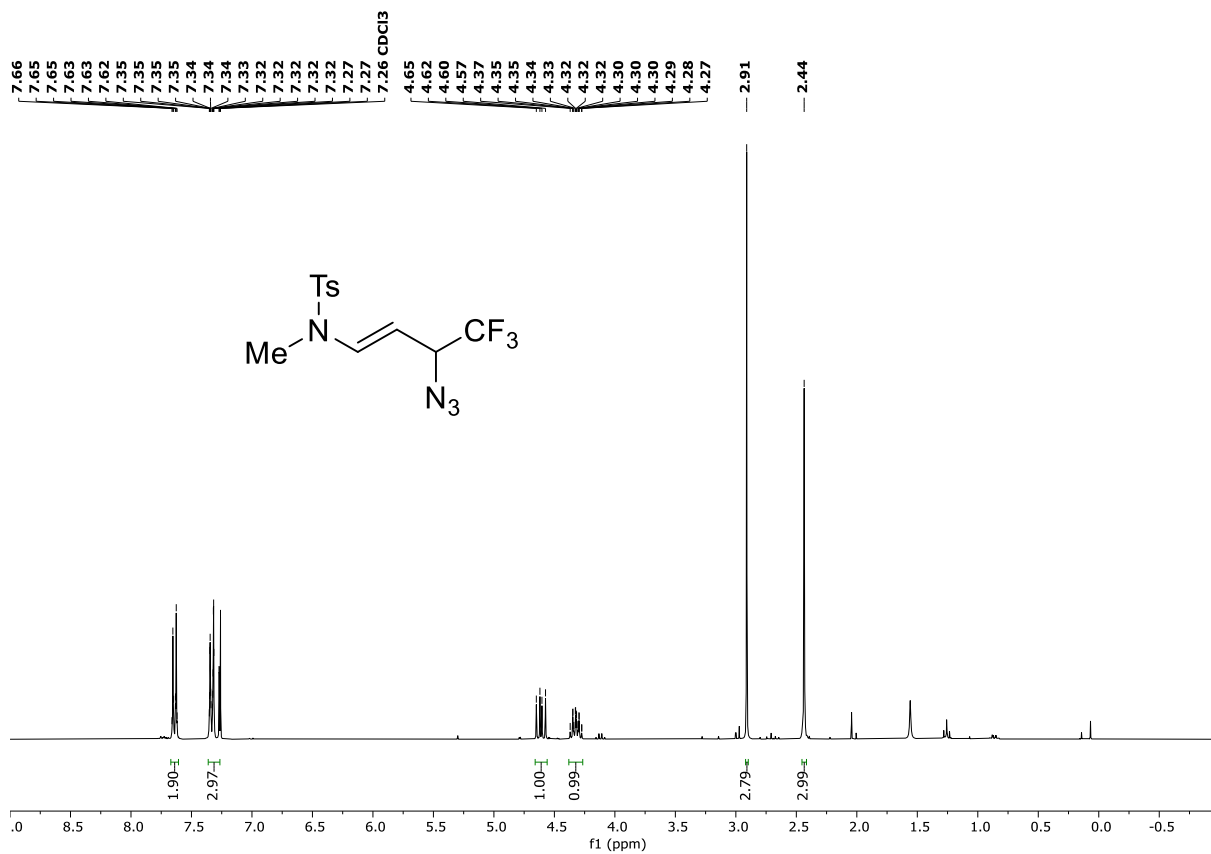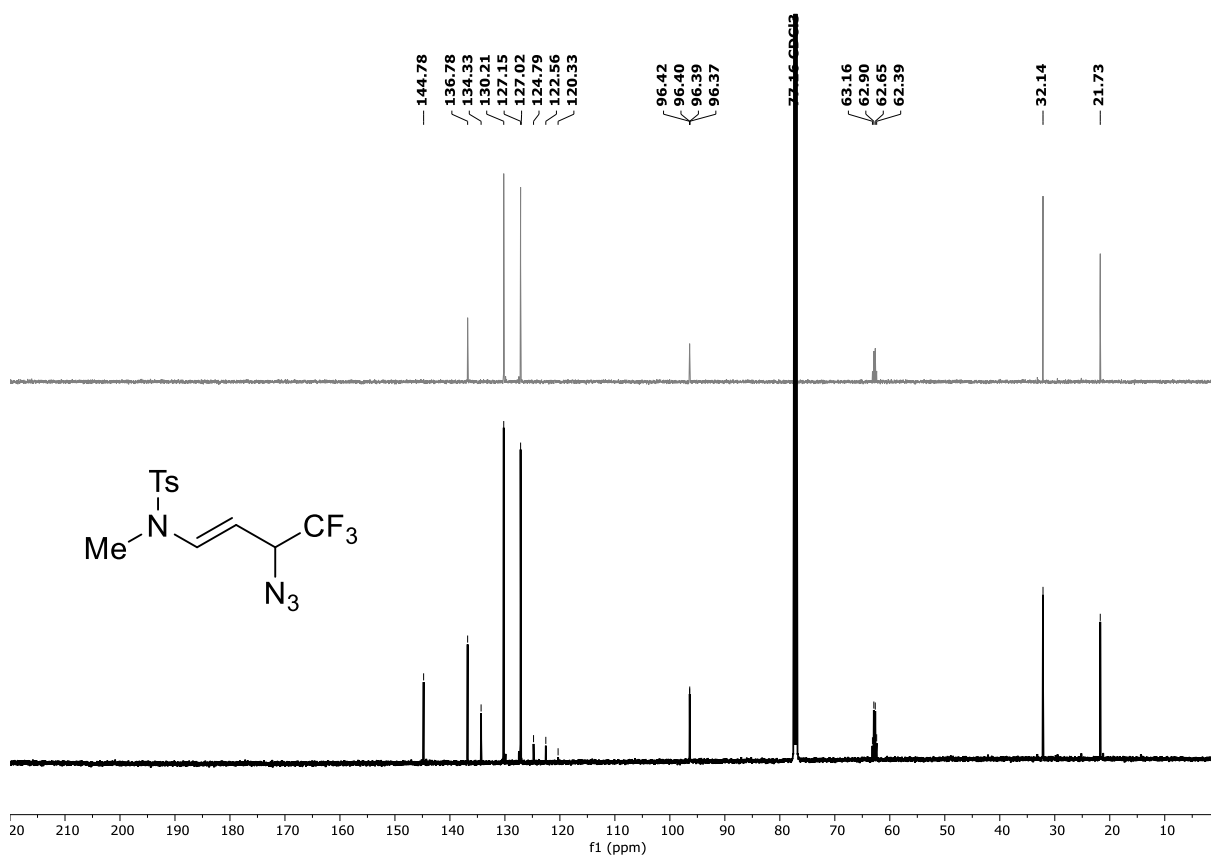

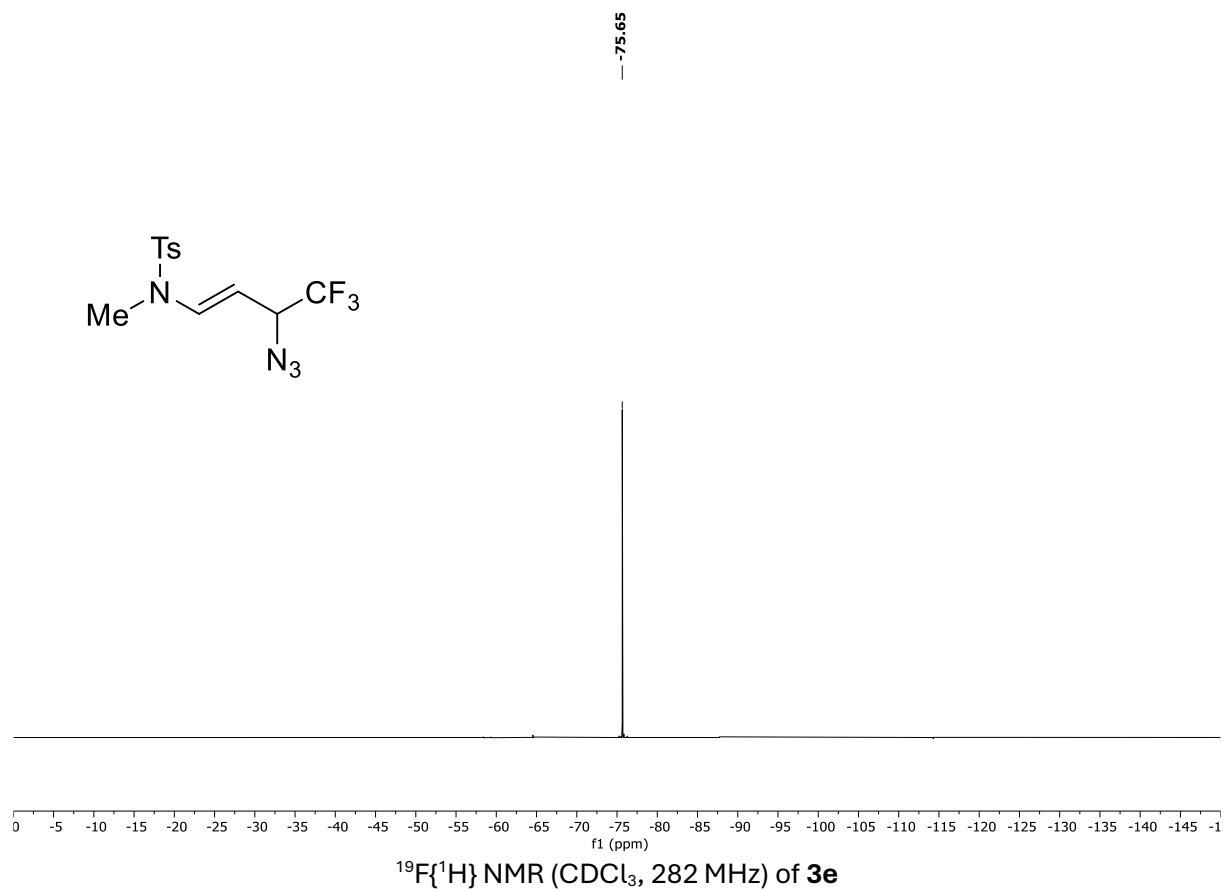

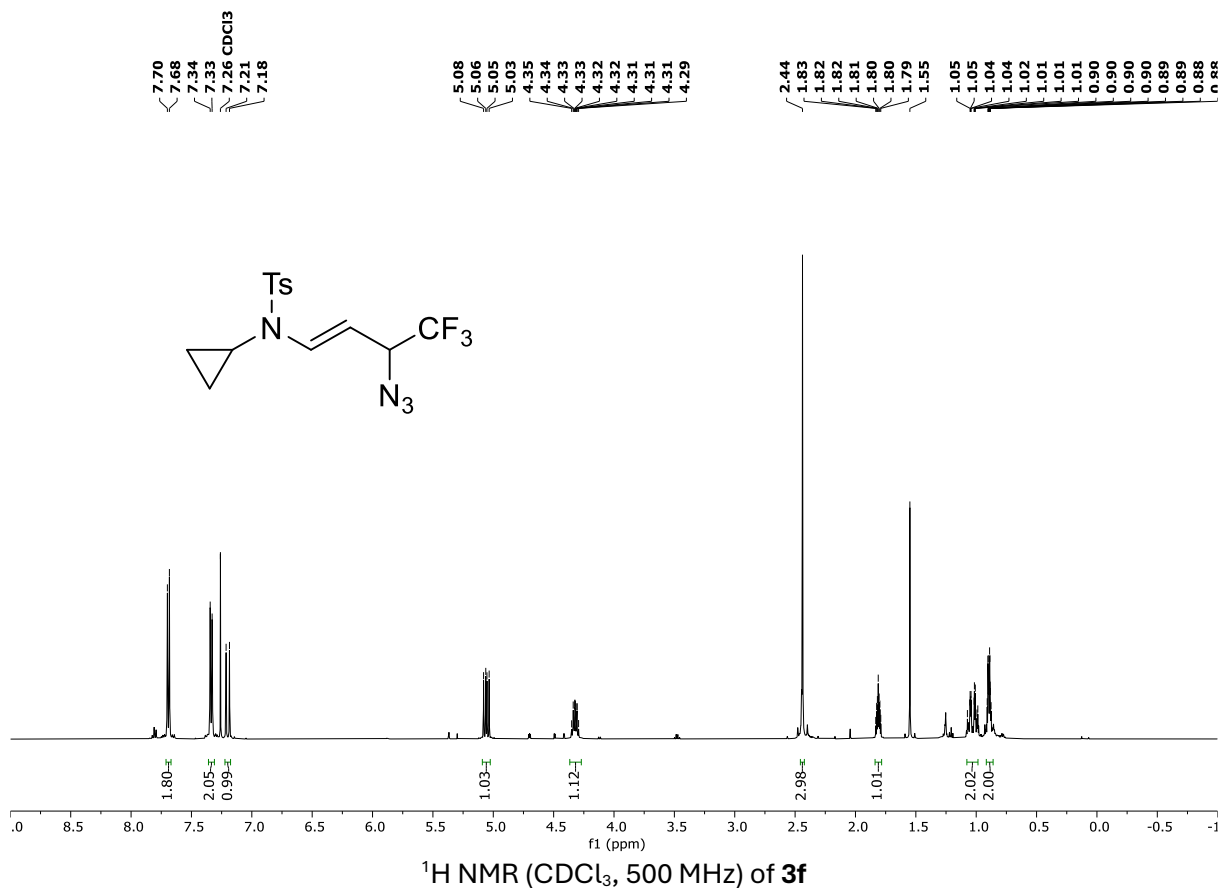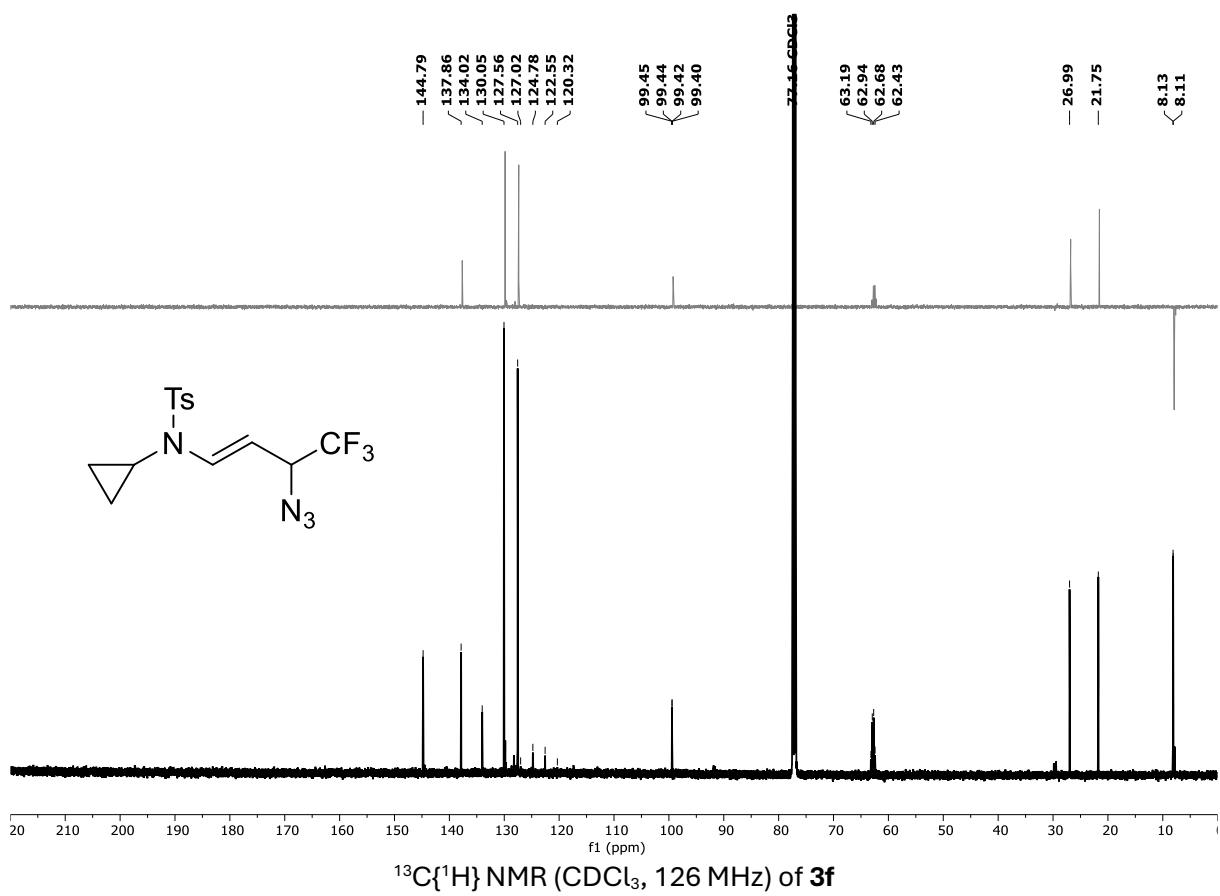

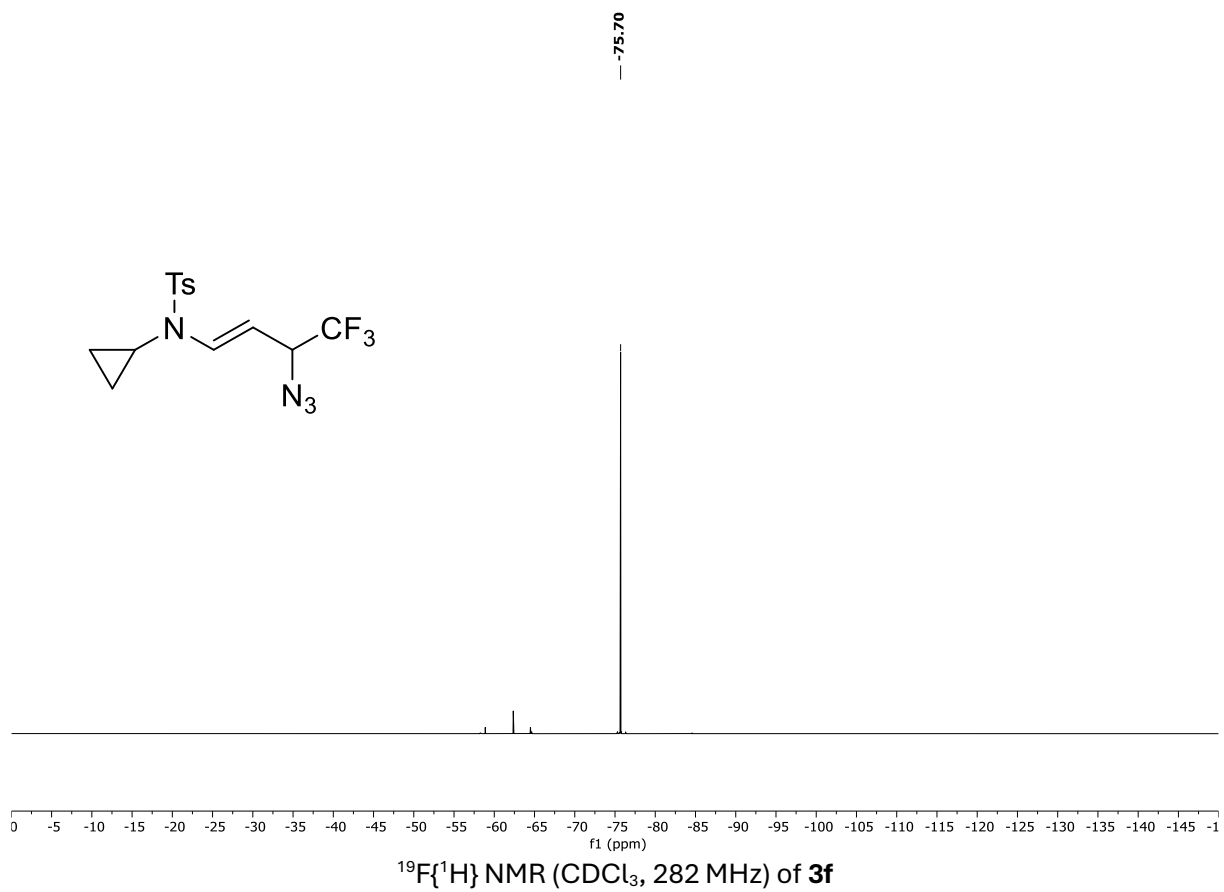

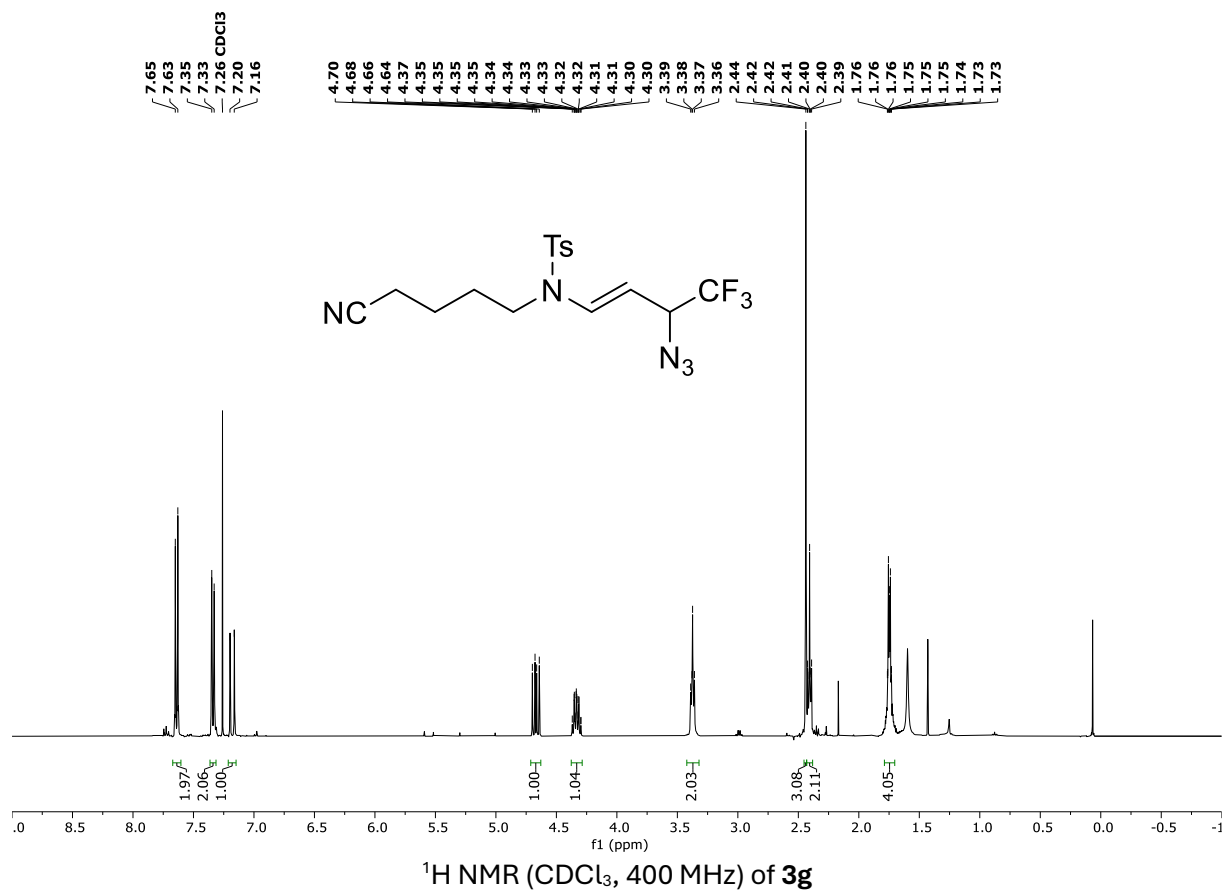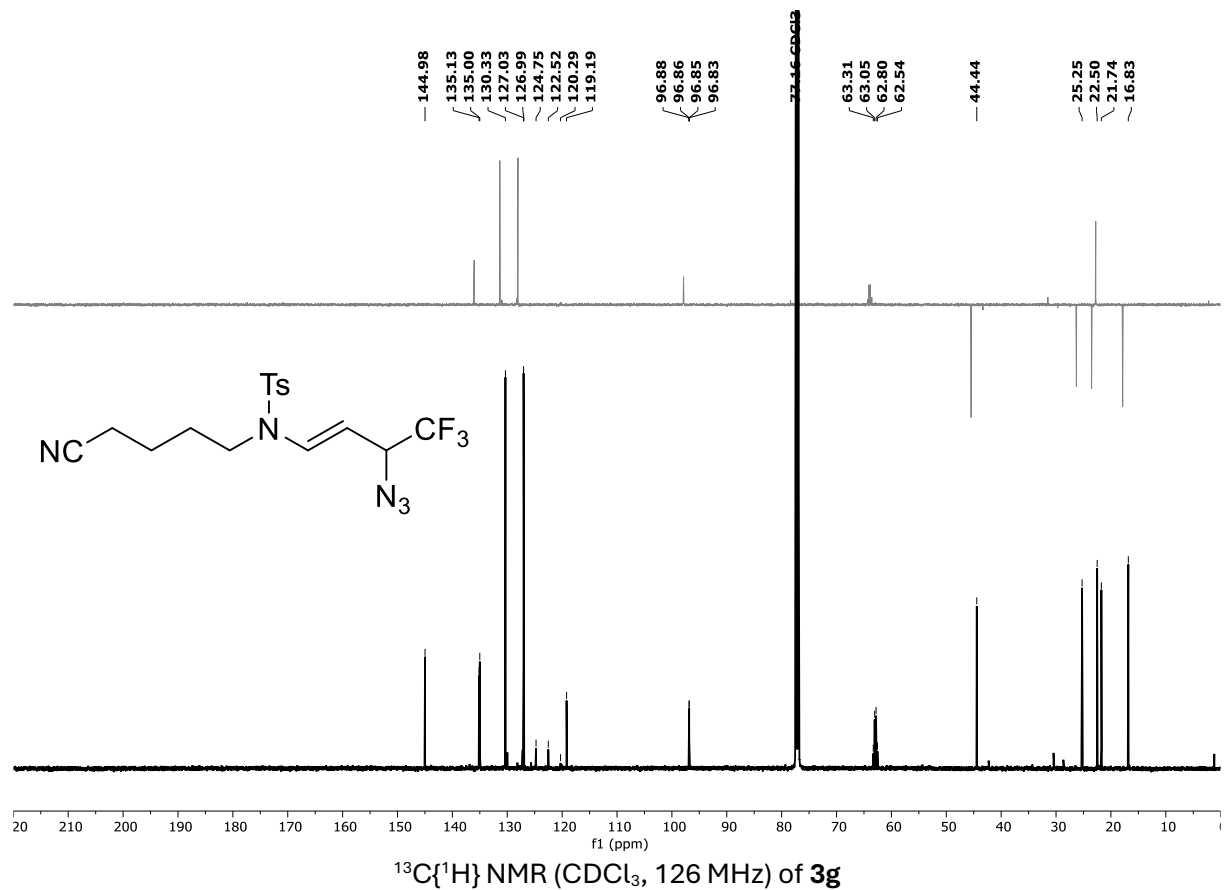

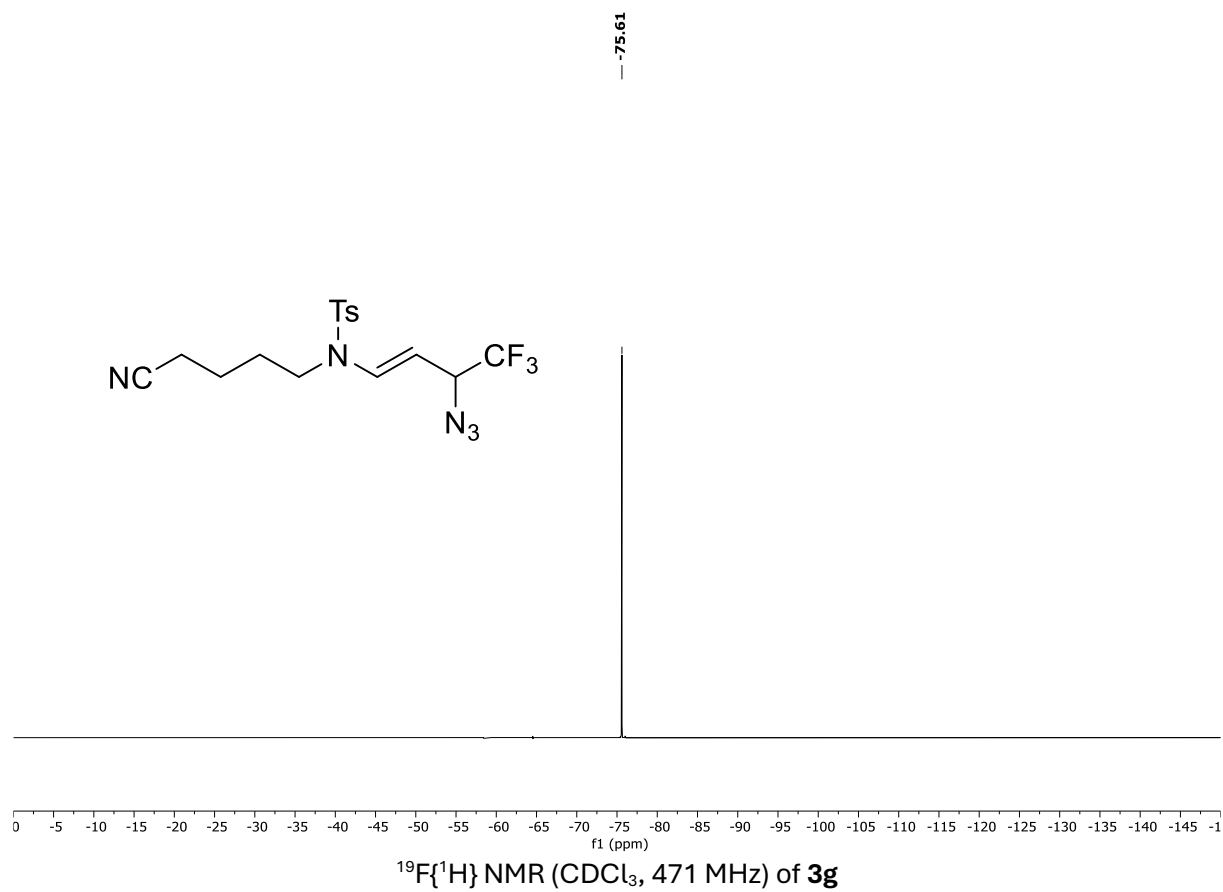



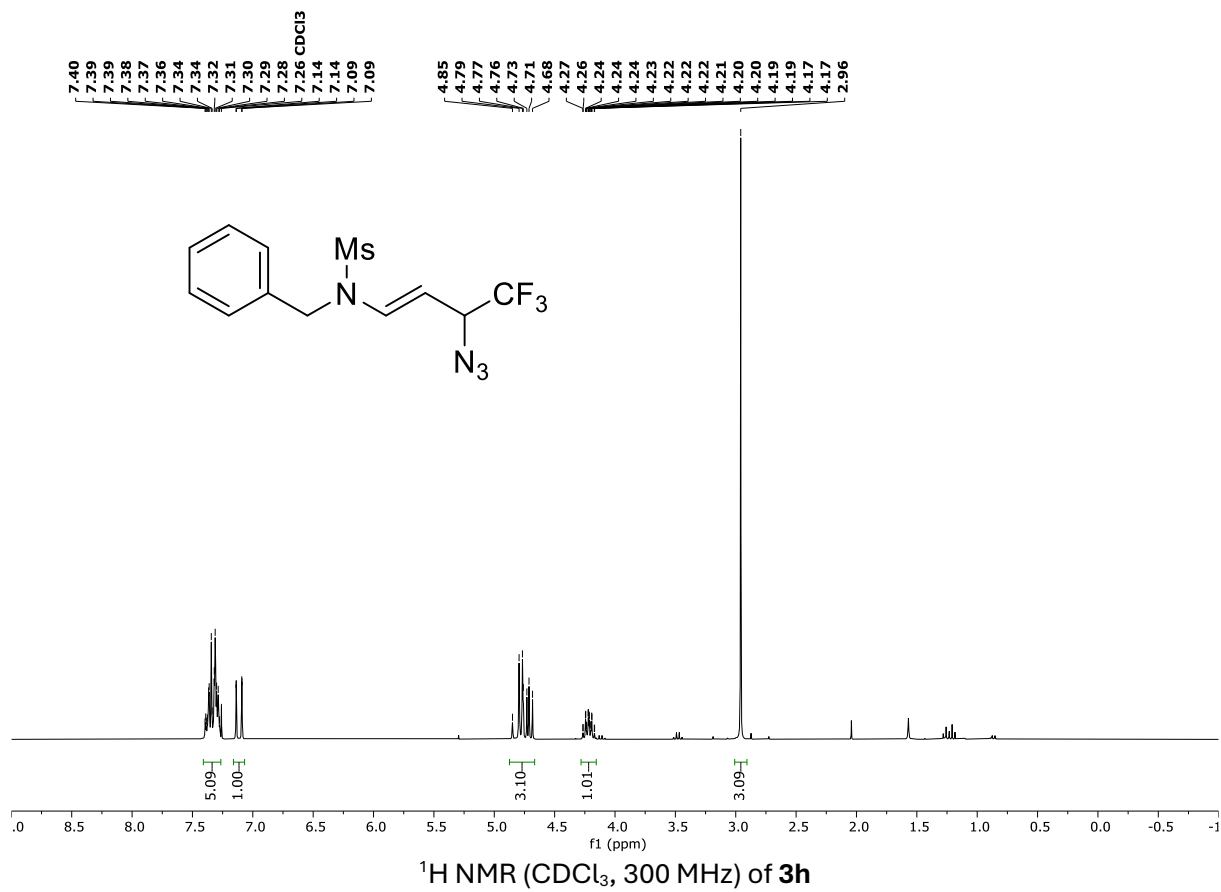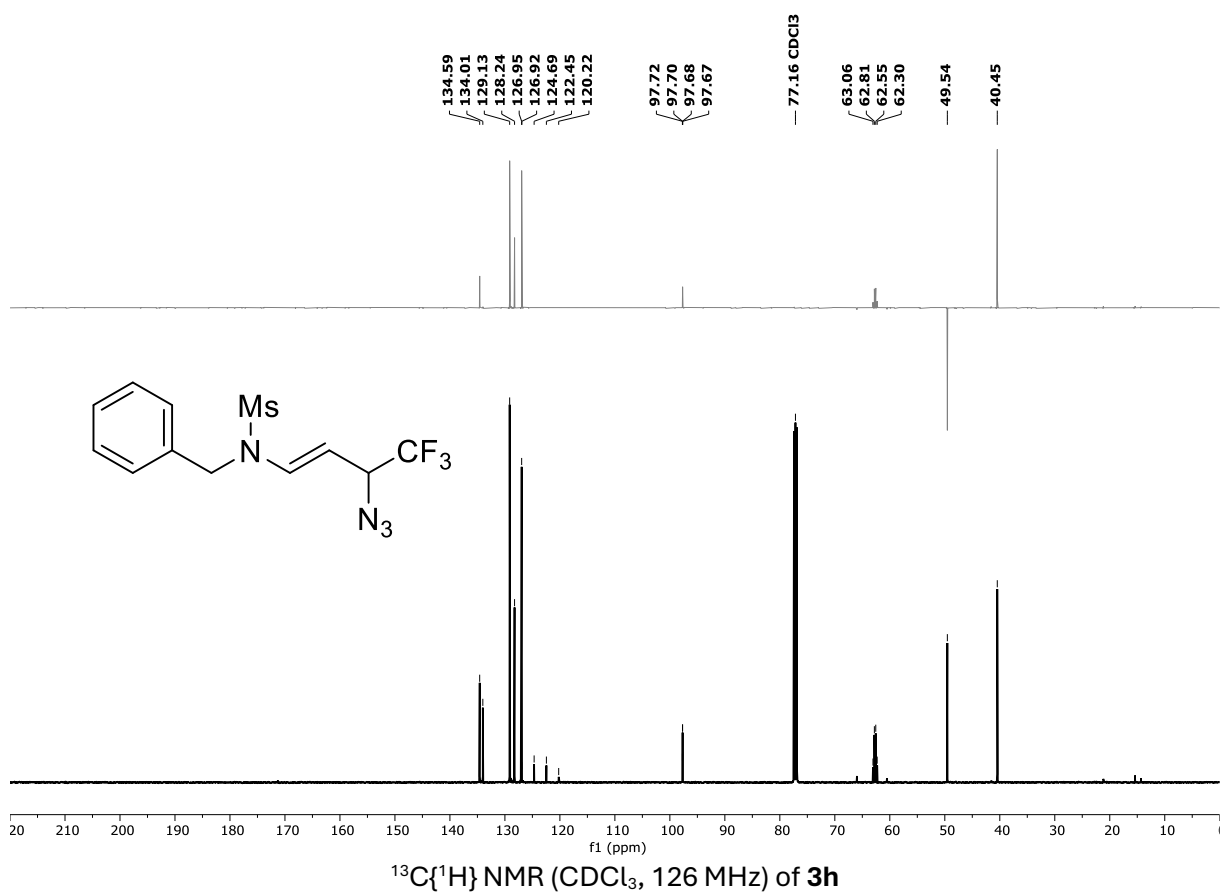

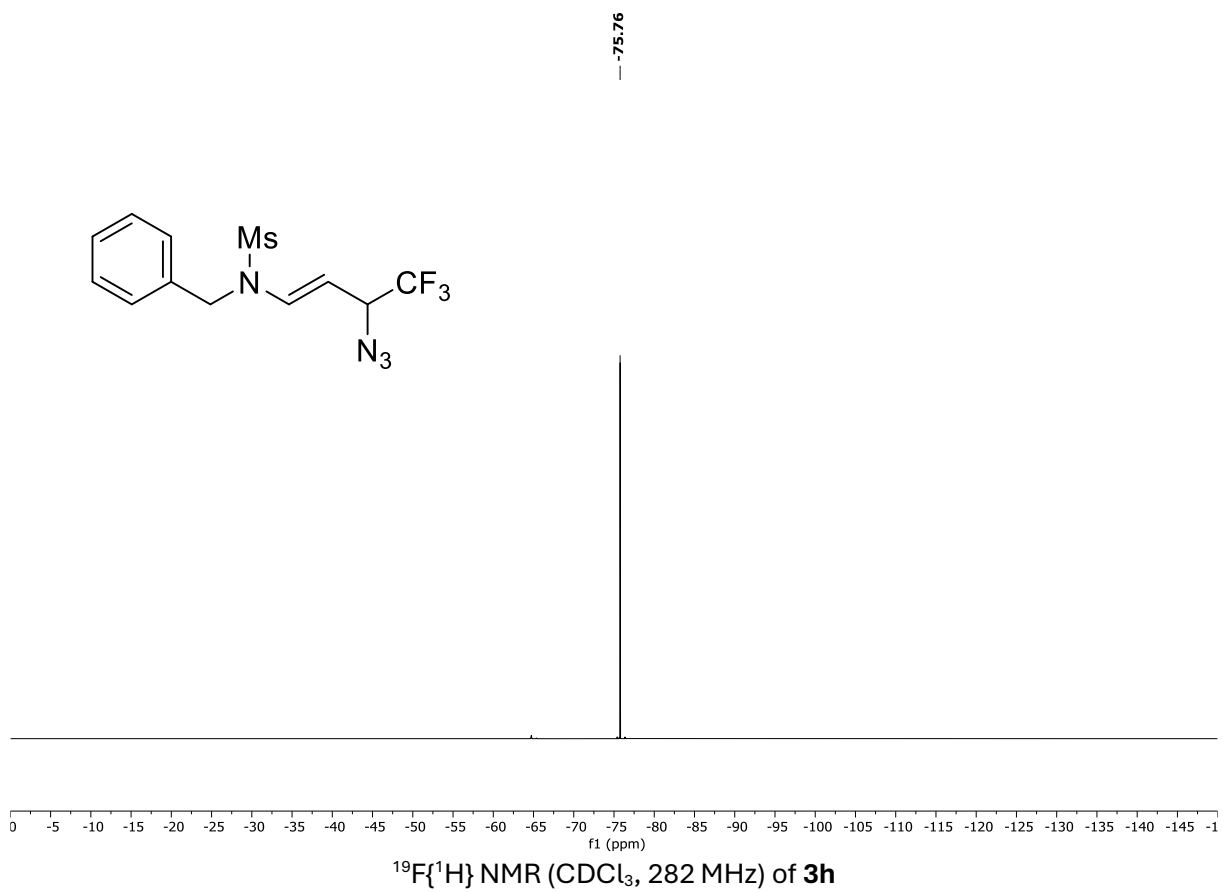

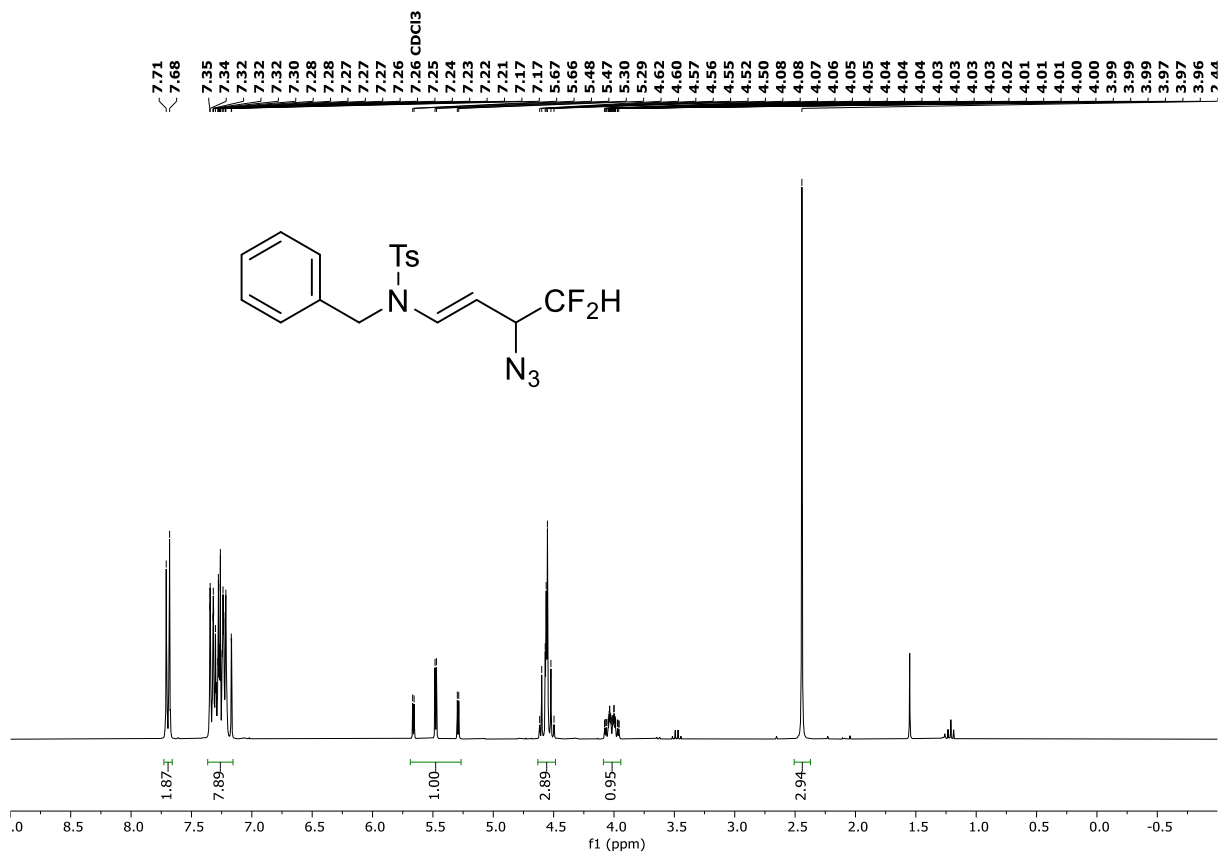

<sup>1</sup>H NMR (CDCl<sub>3</sub>, 300 MHz) of **3i**

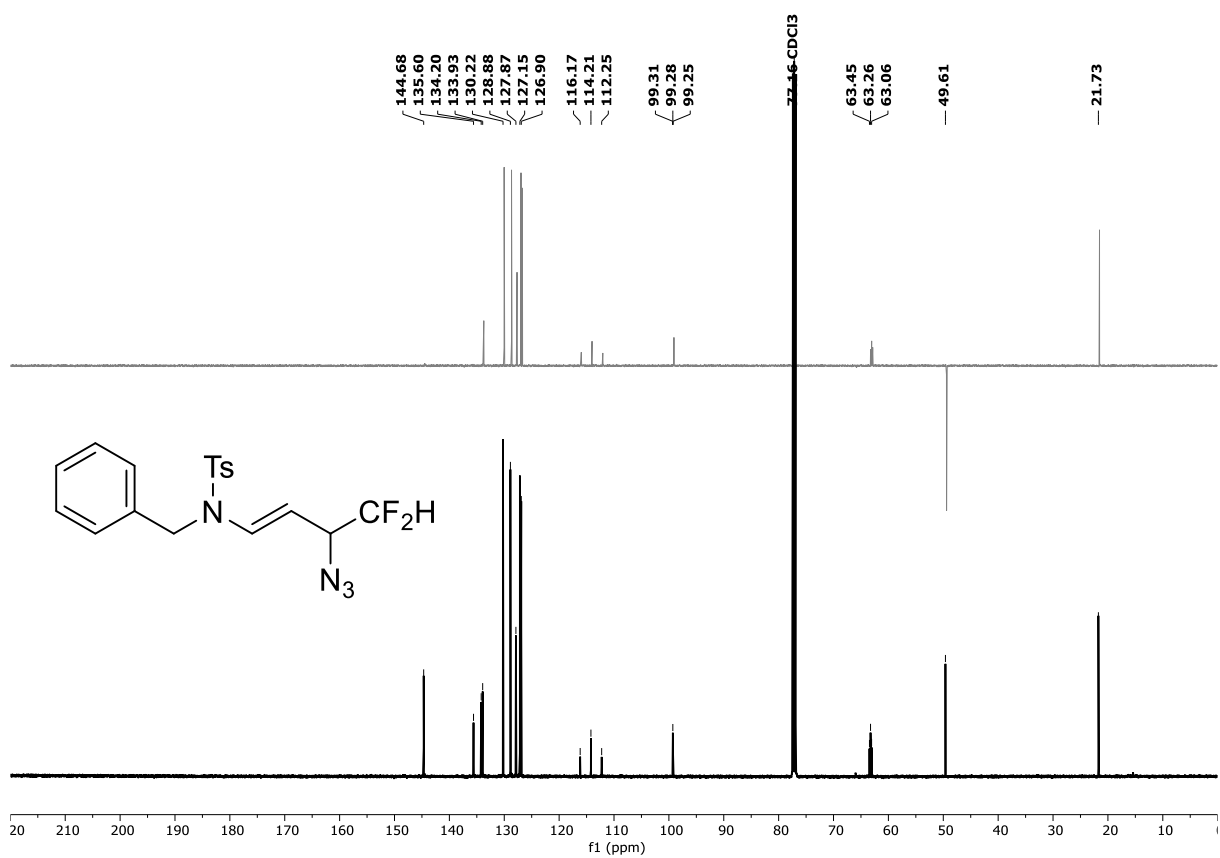

<sup>13</sup>C{<sup>1</sup>H} NMR (CDCl<sub>3</sub>, 126 MHz) of **3i**

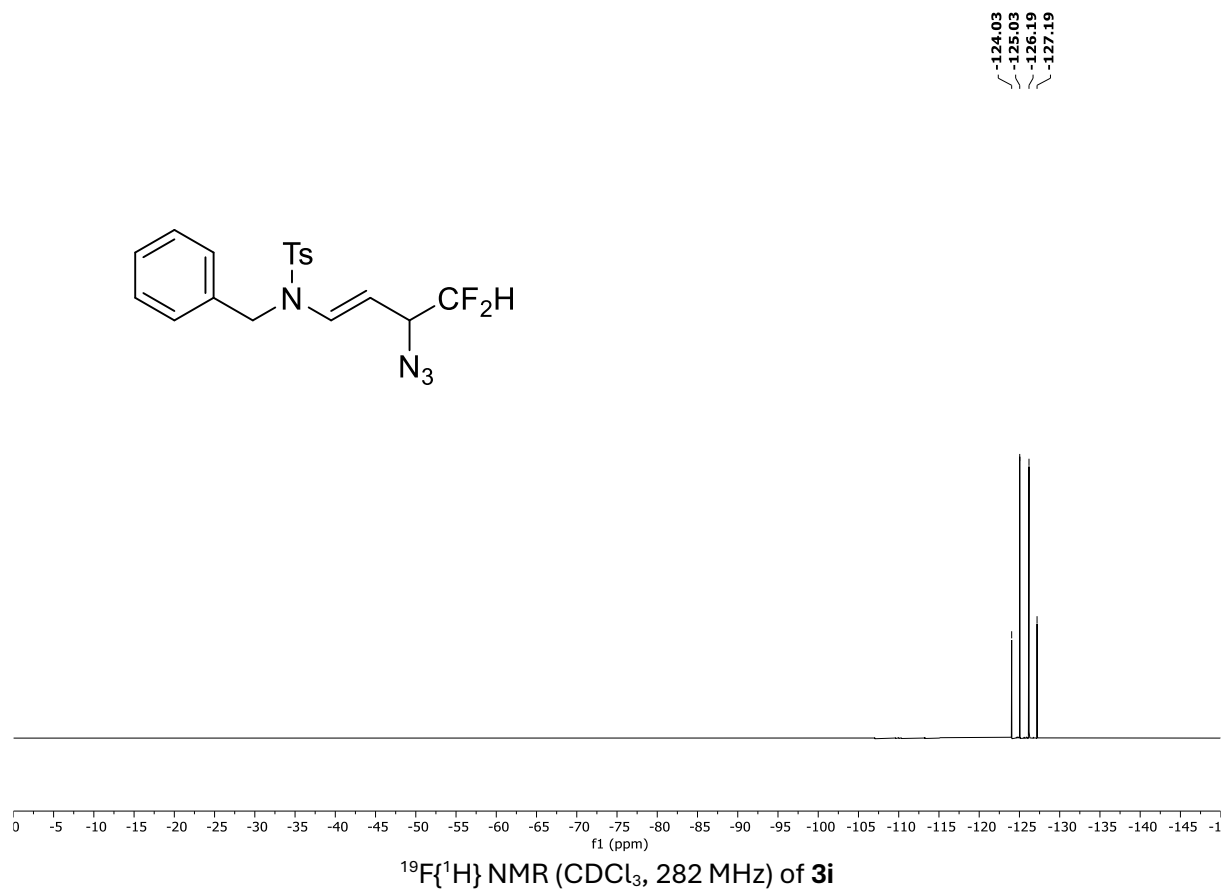

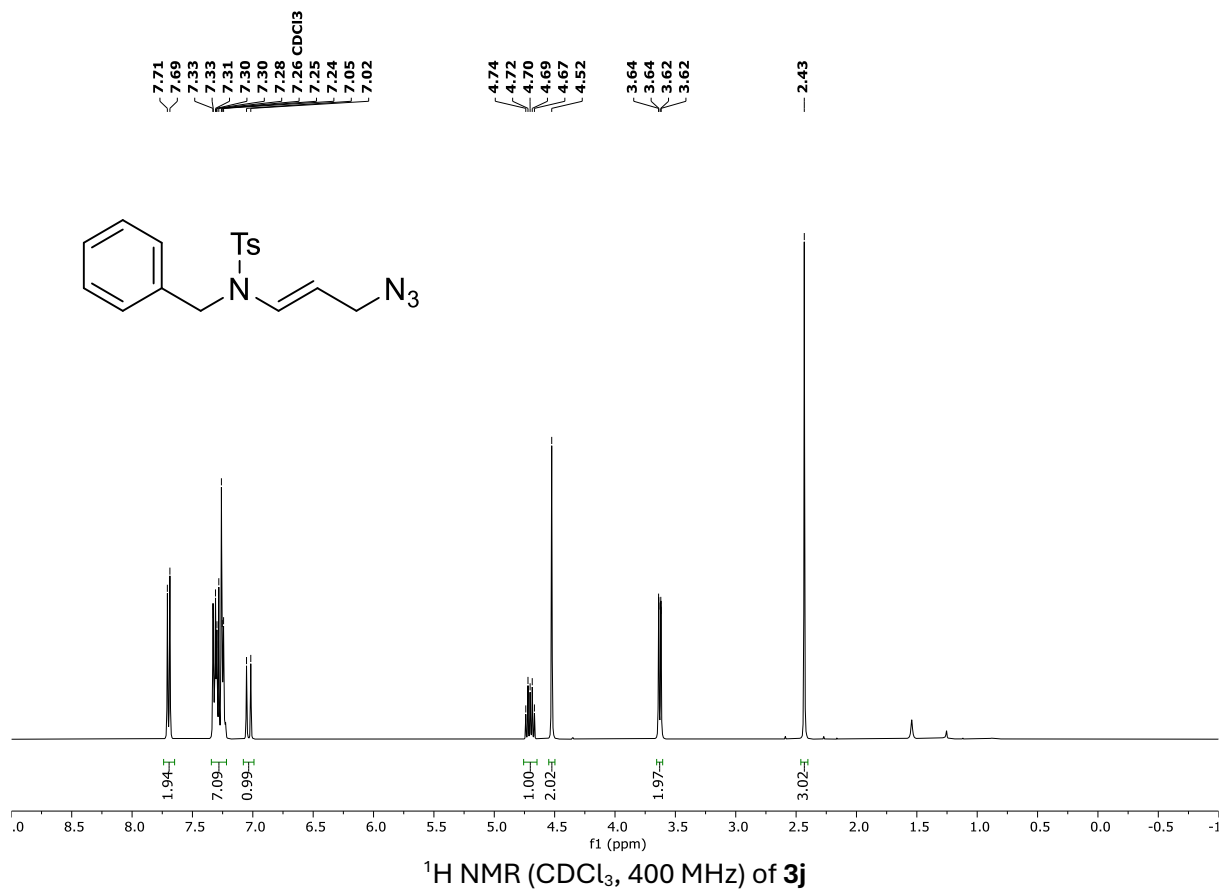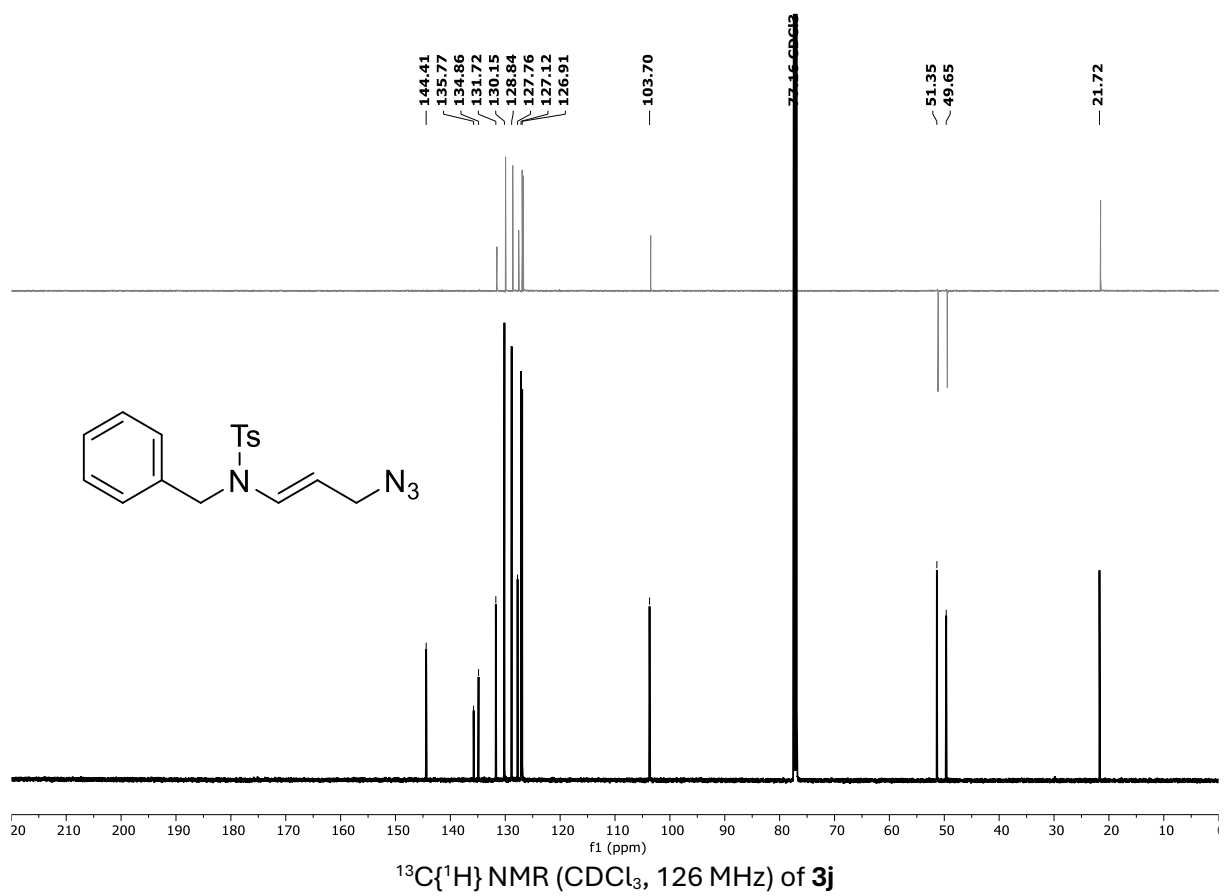

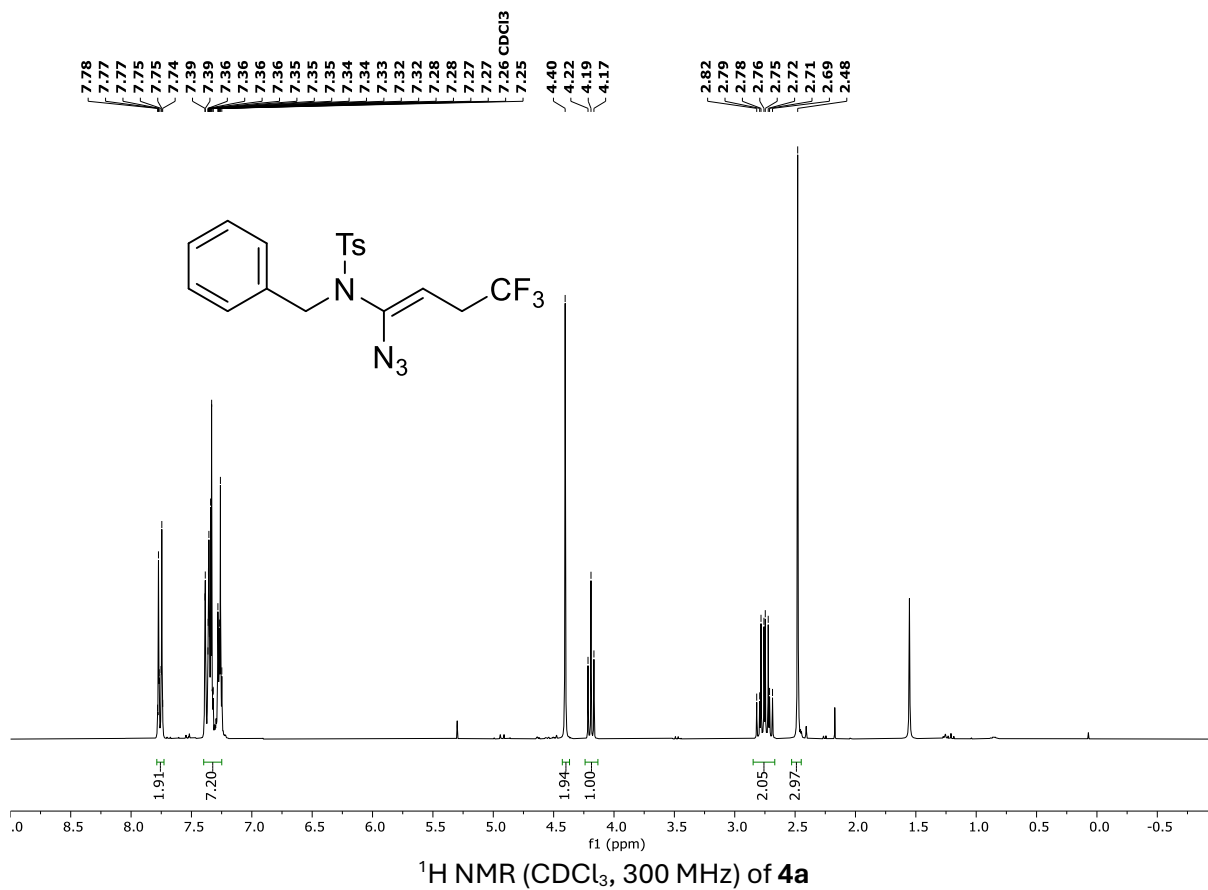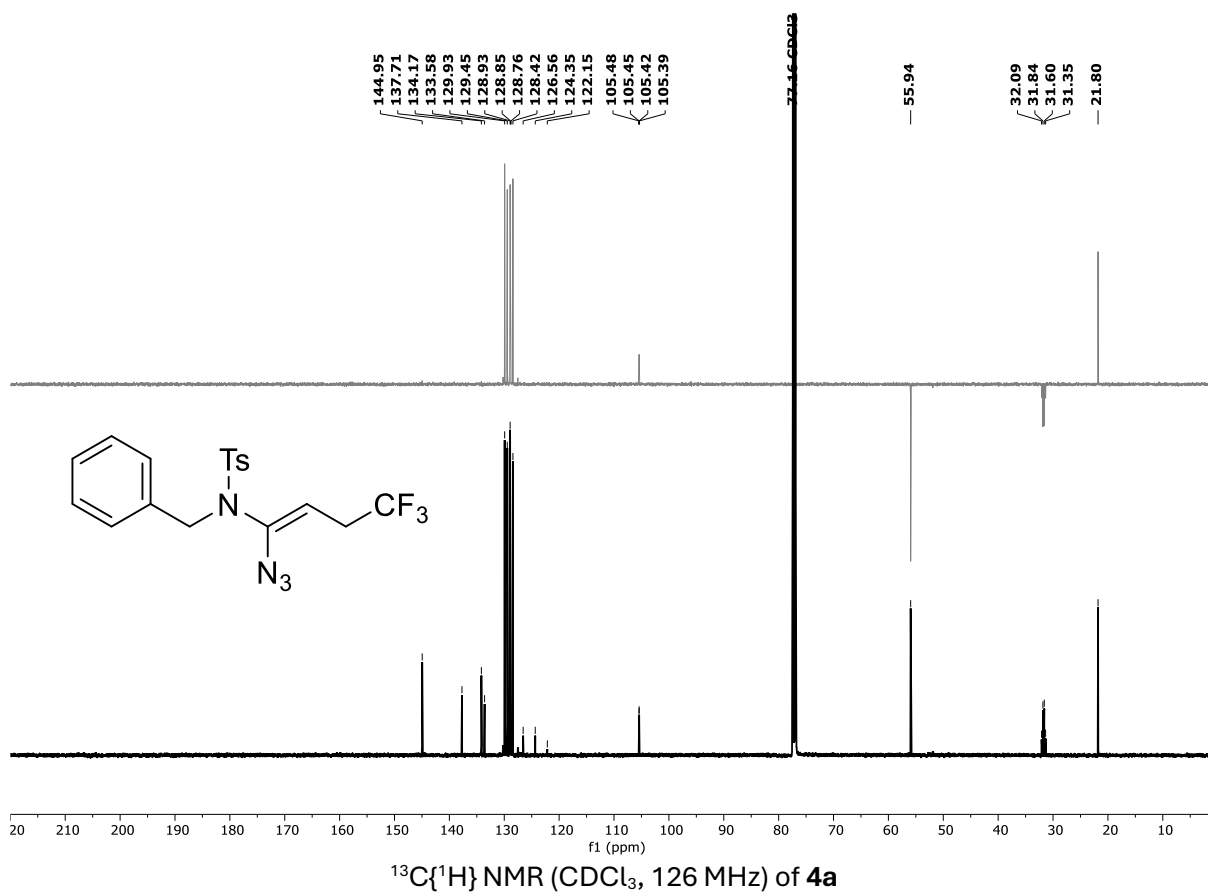

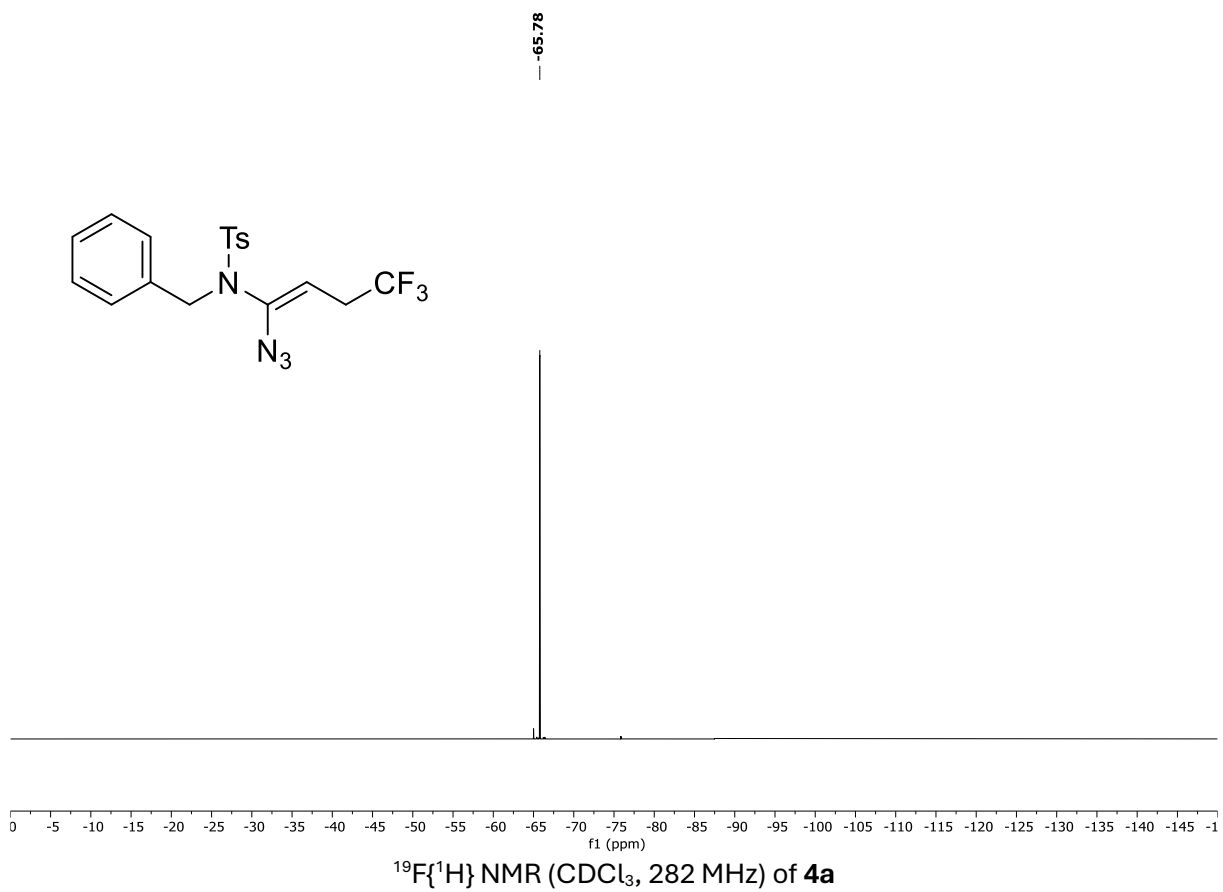

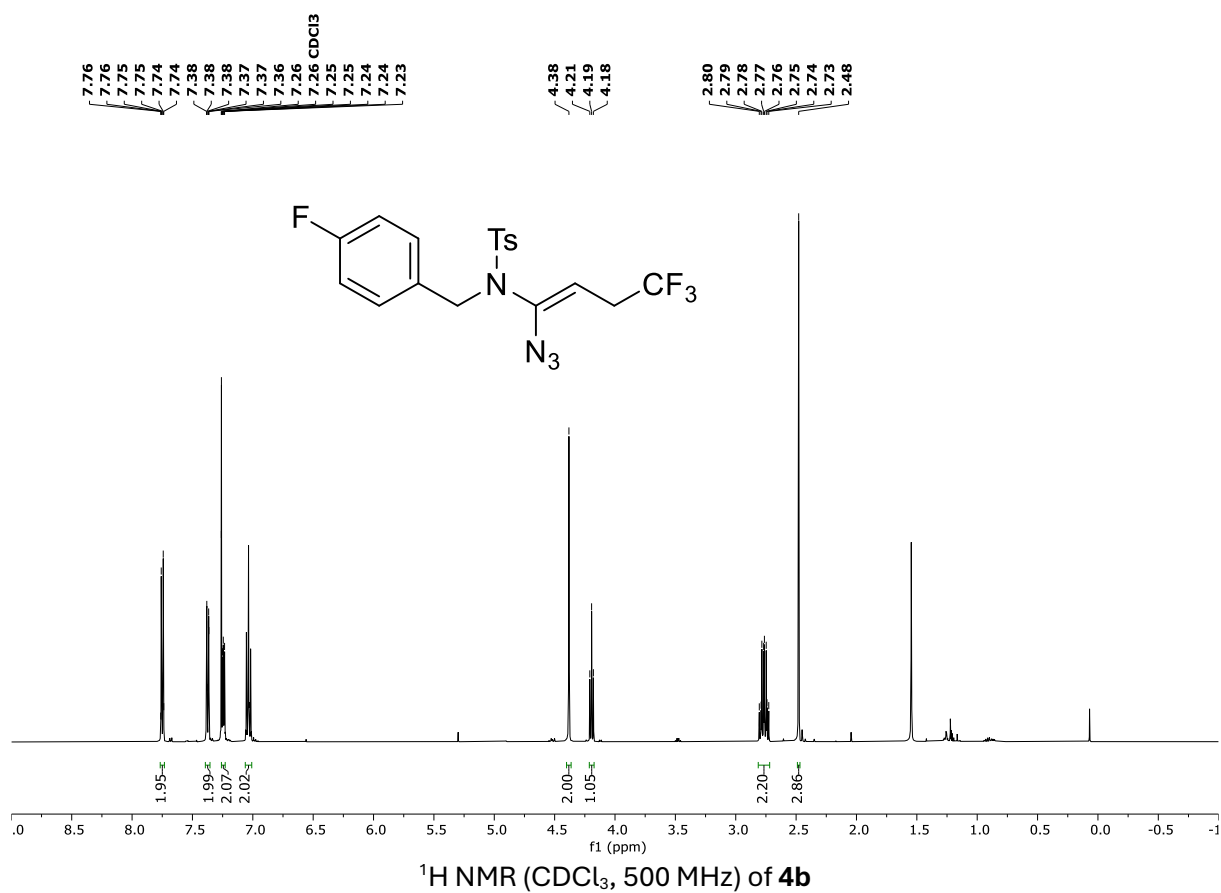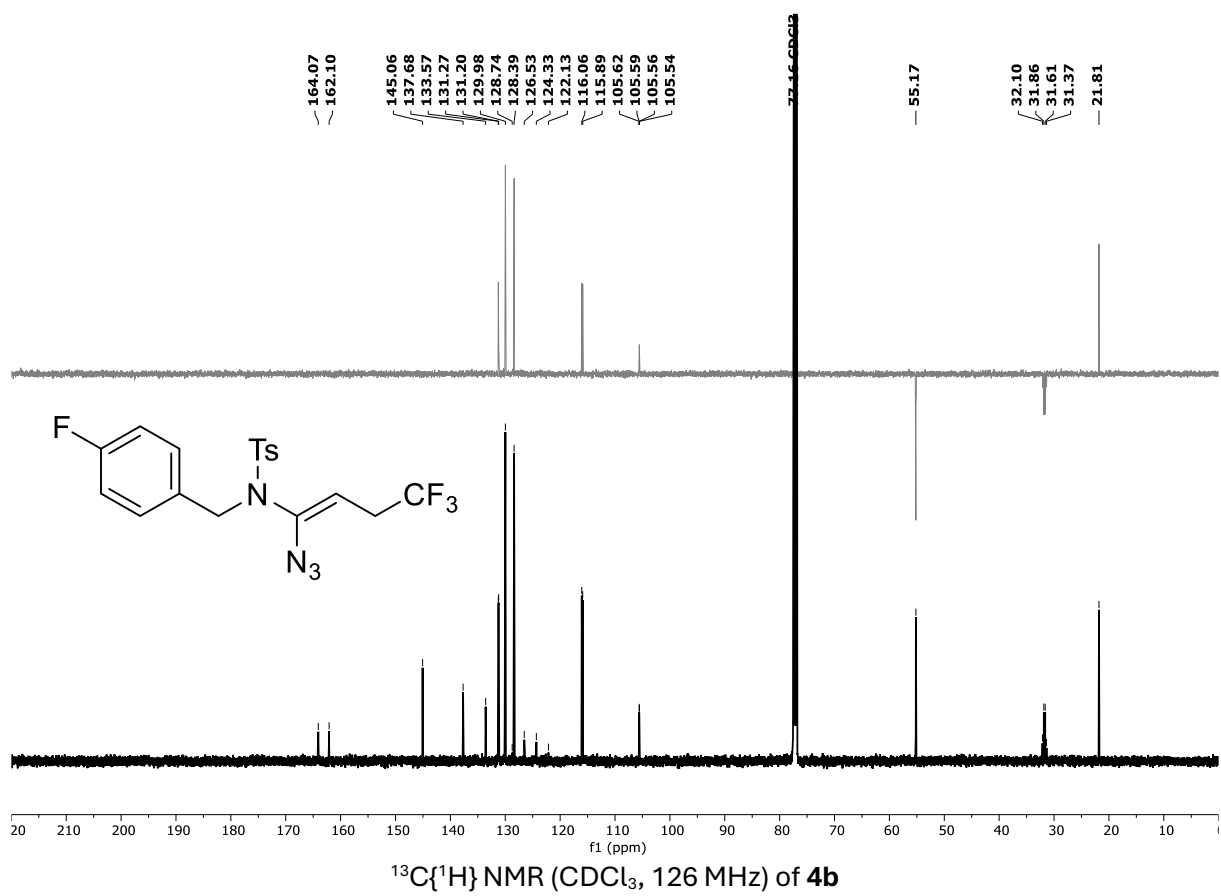



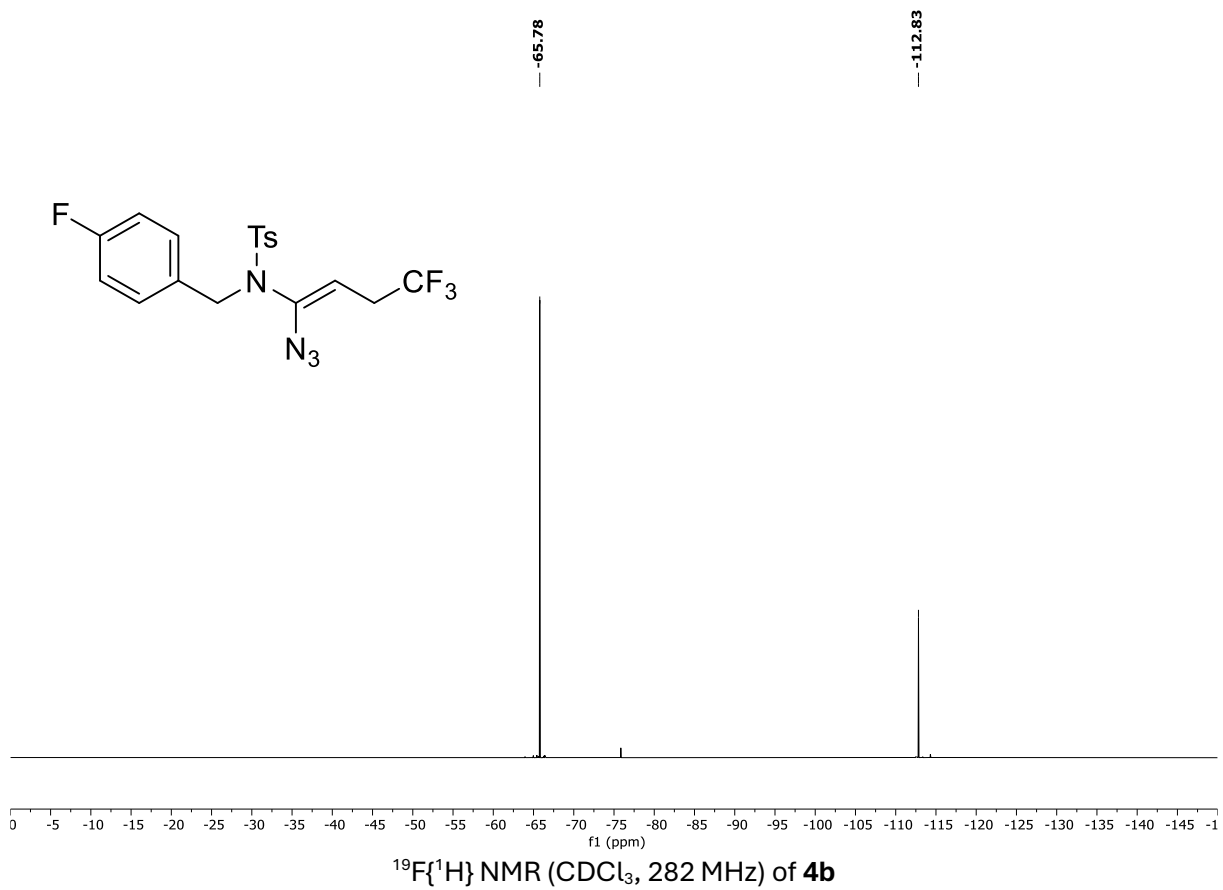

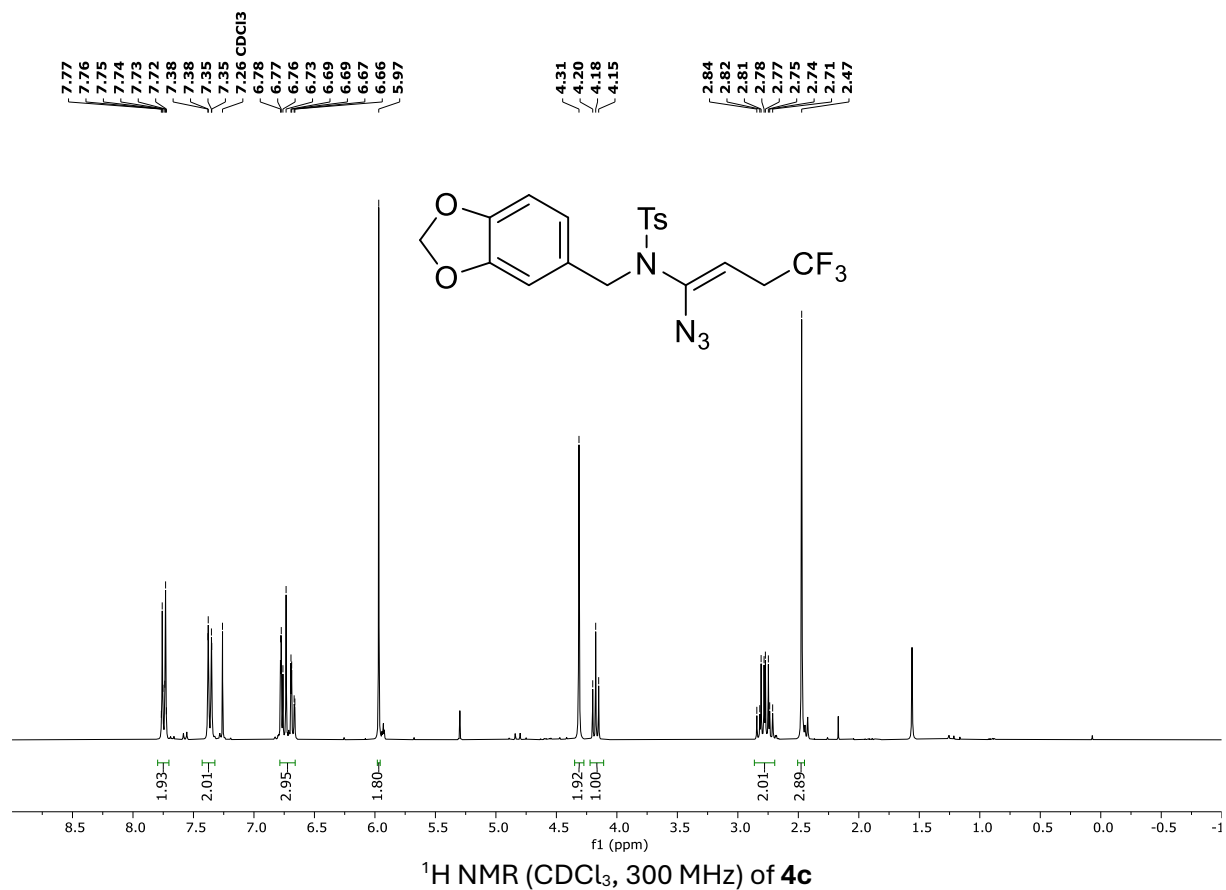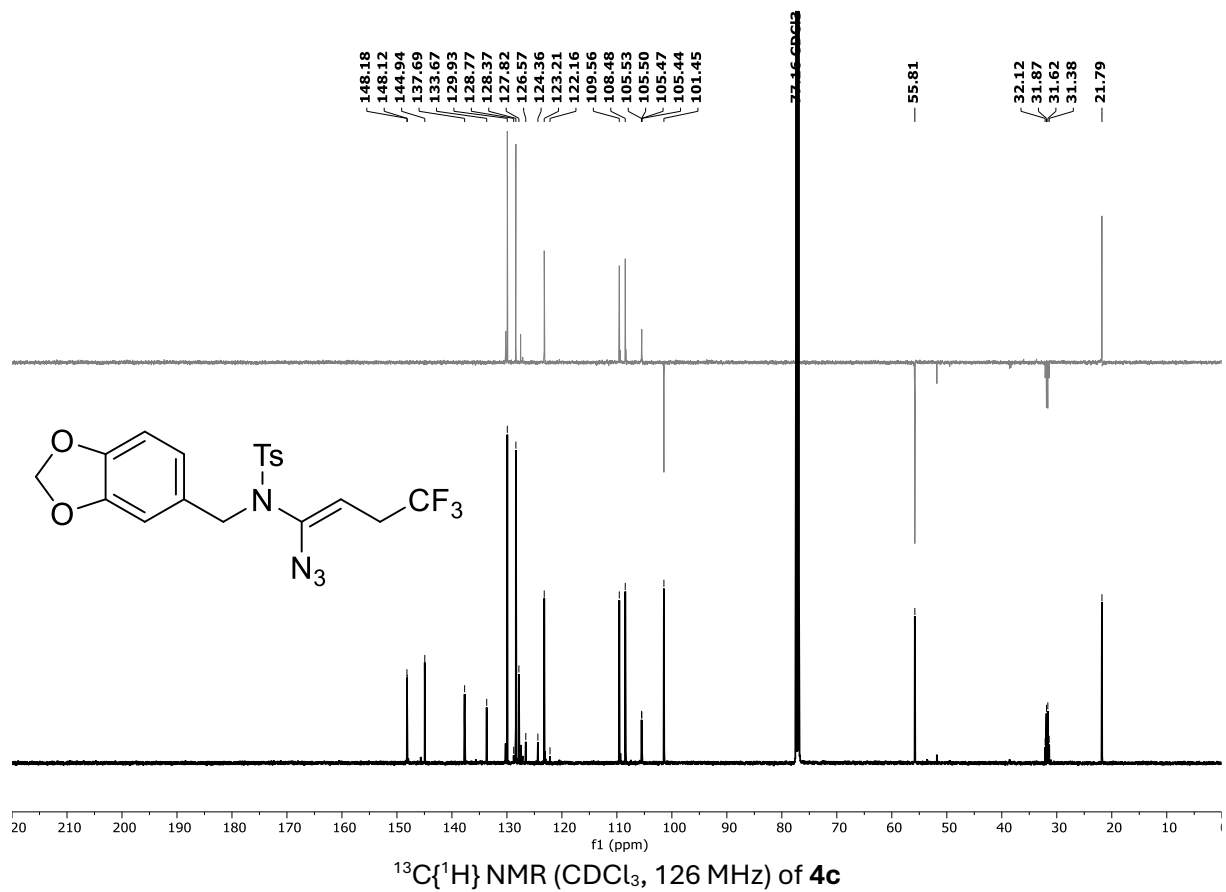

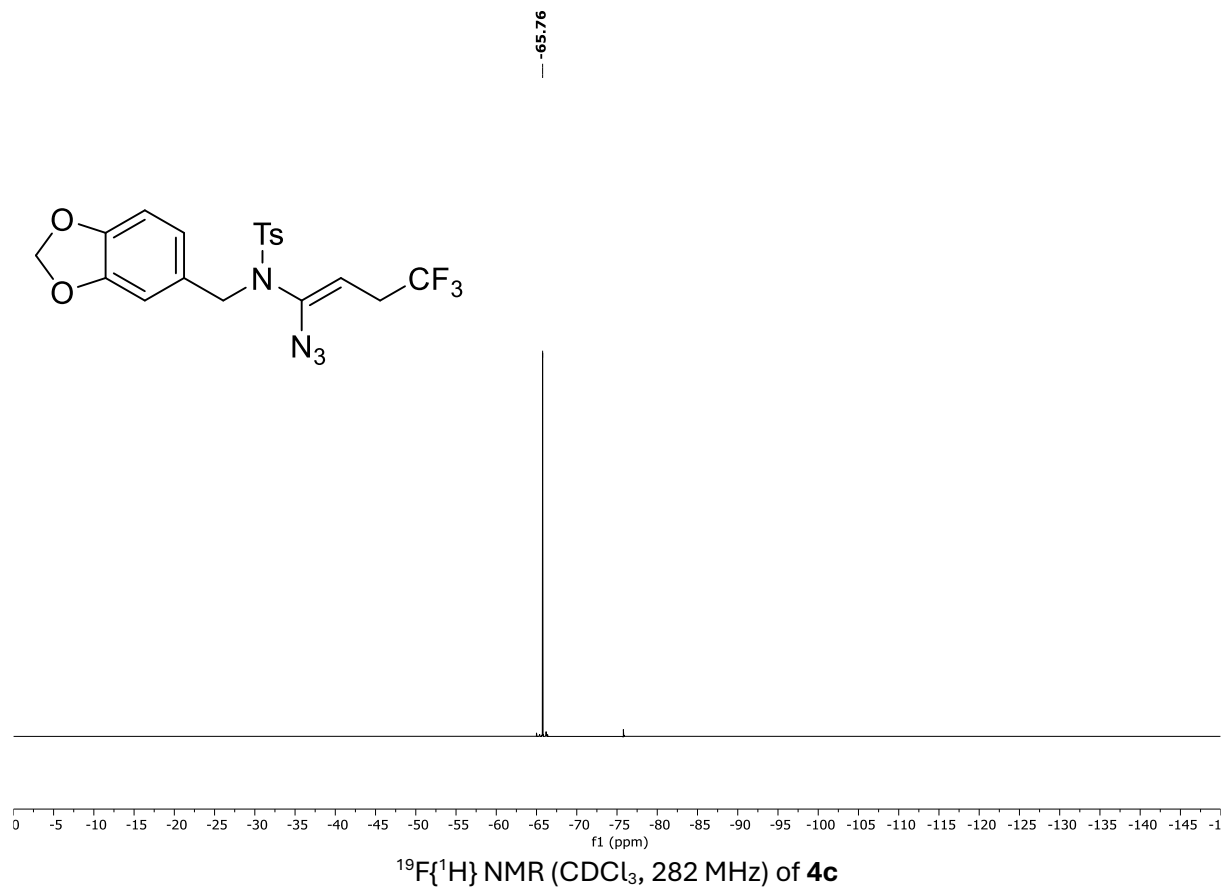

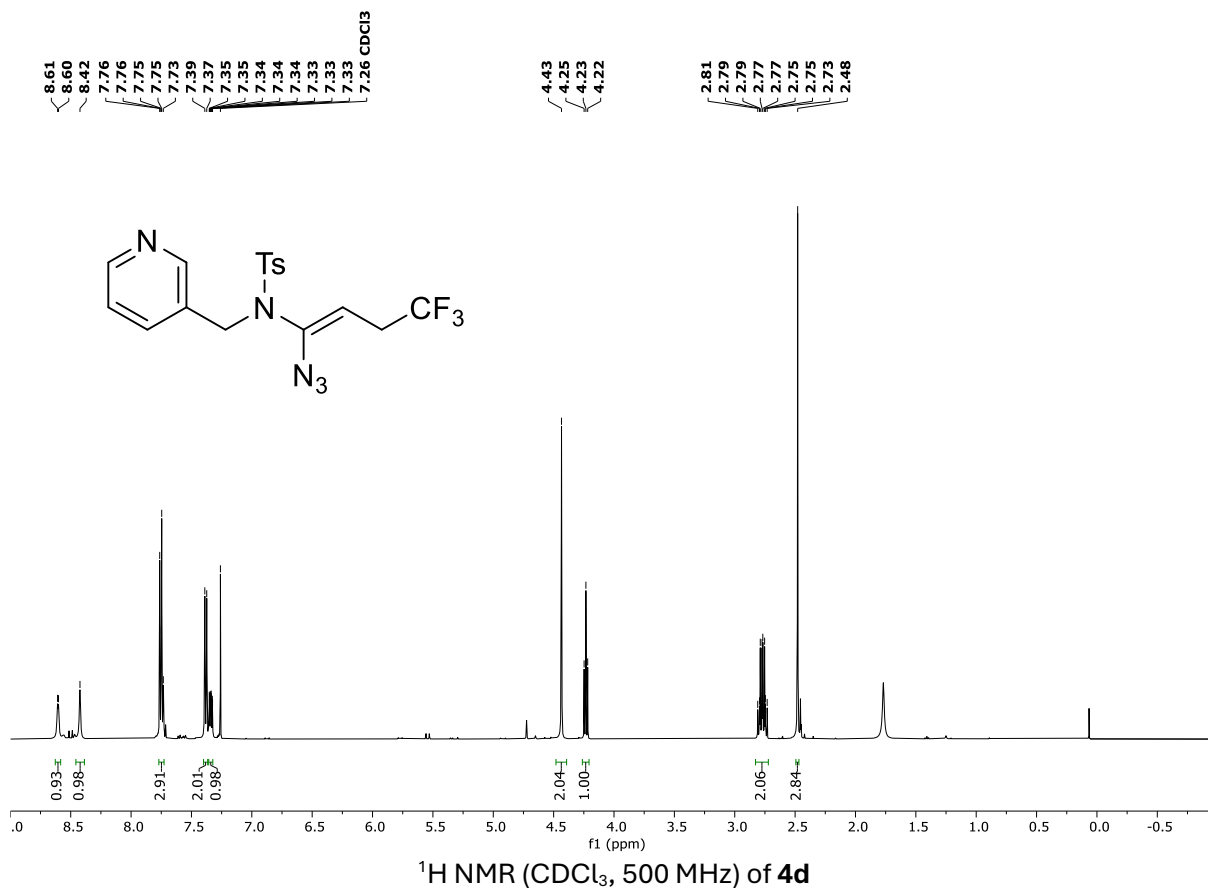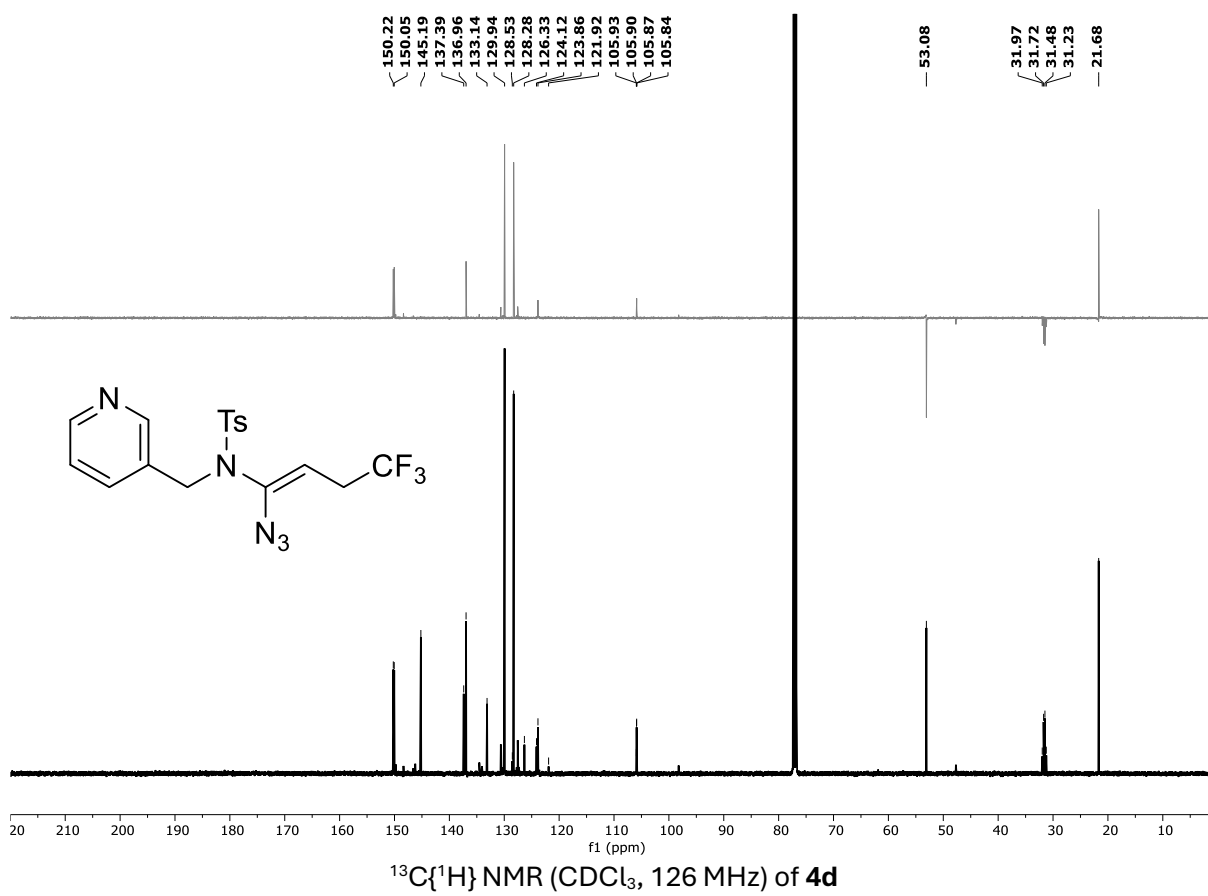

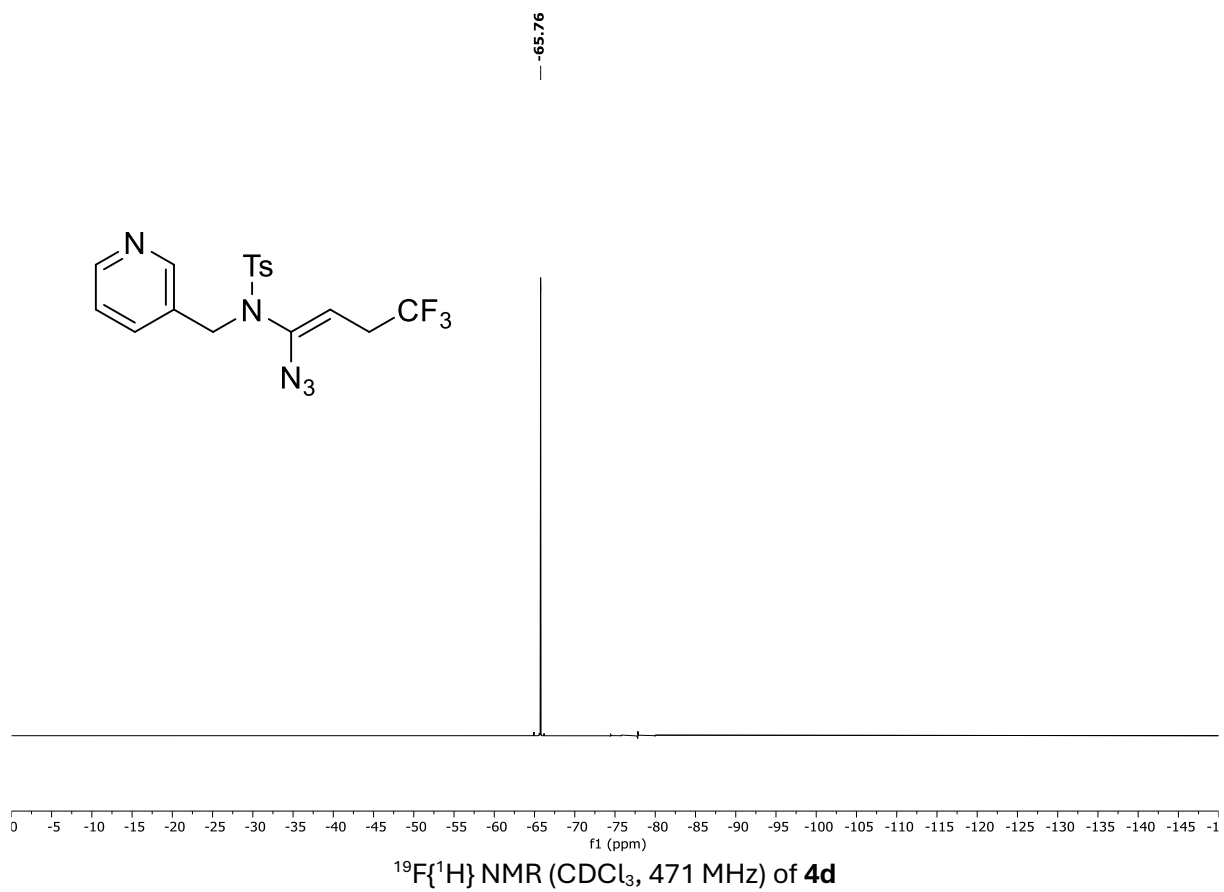

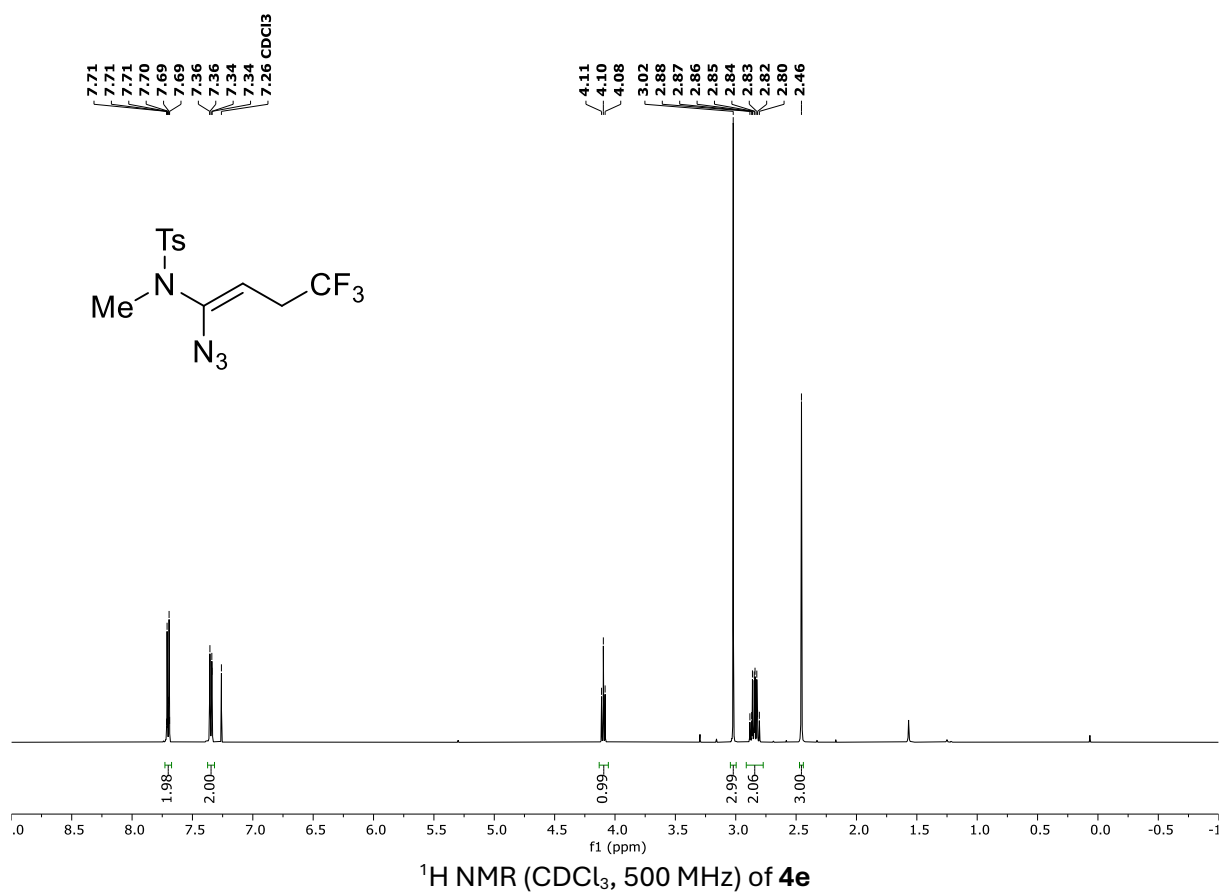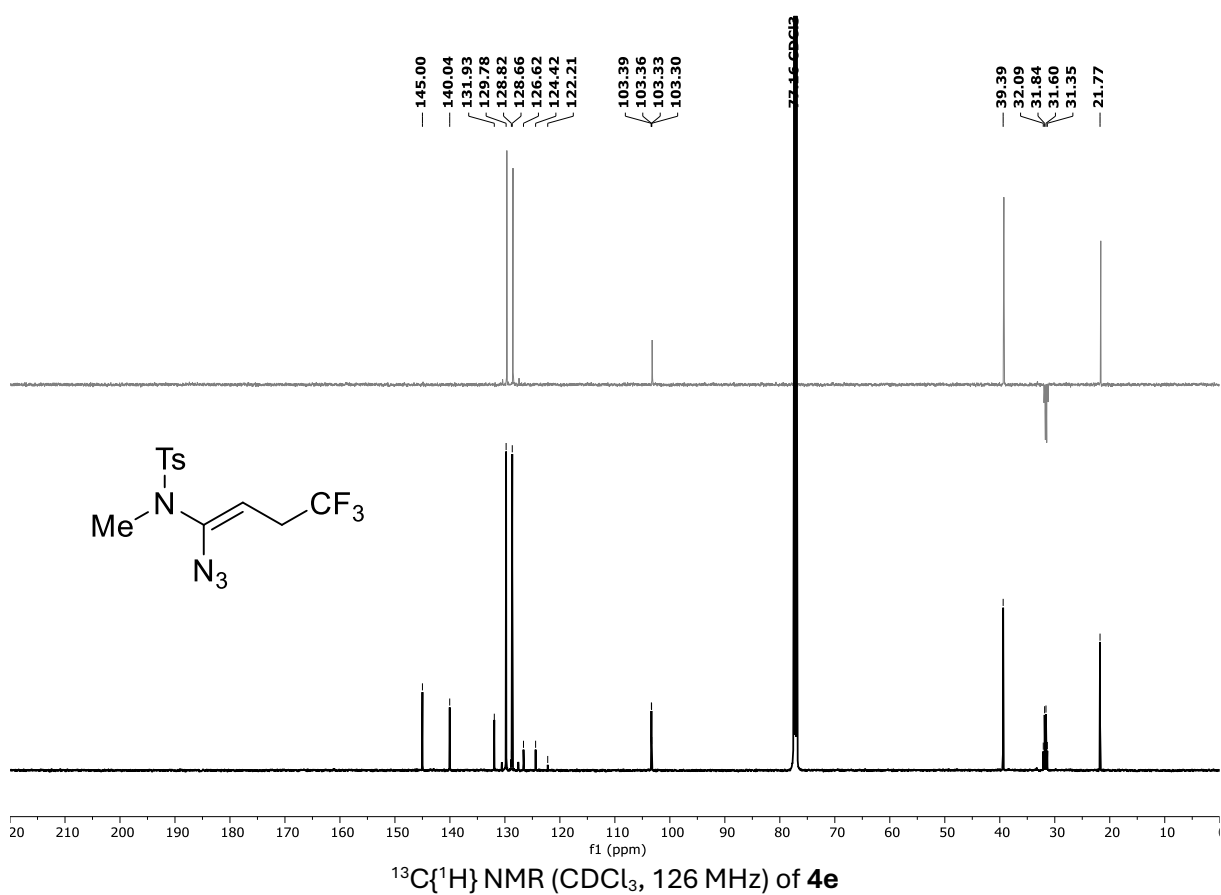

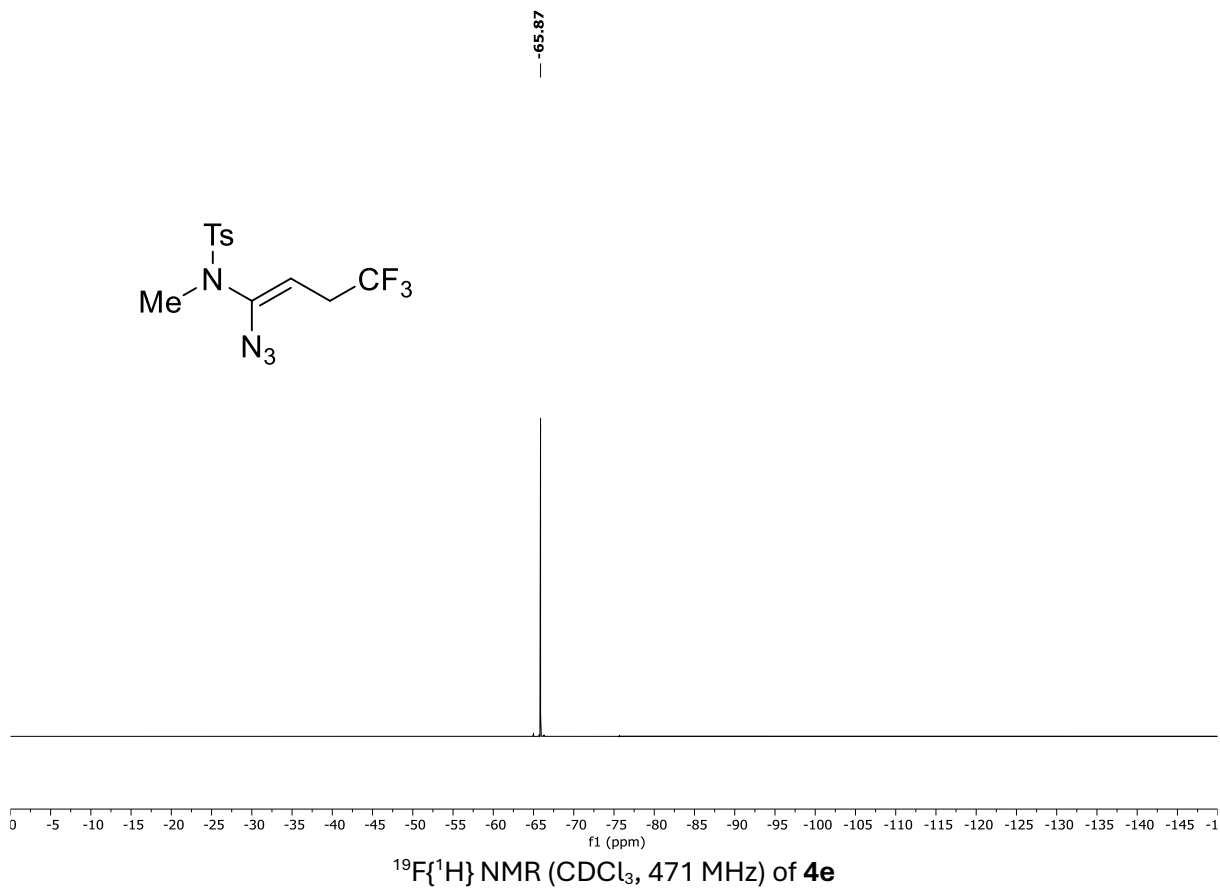

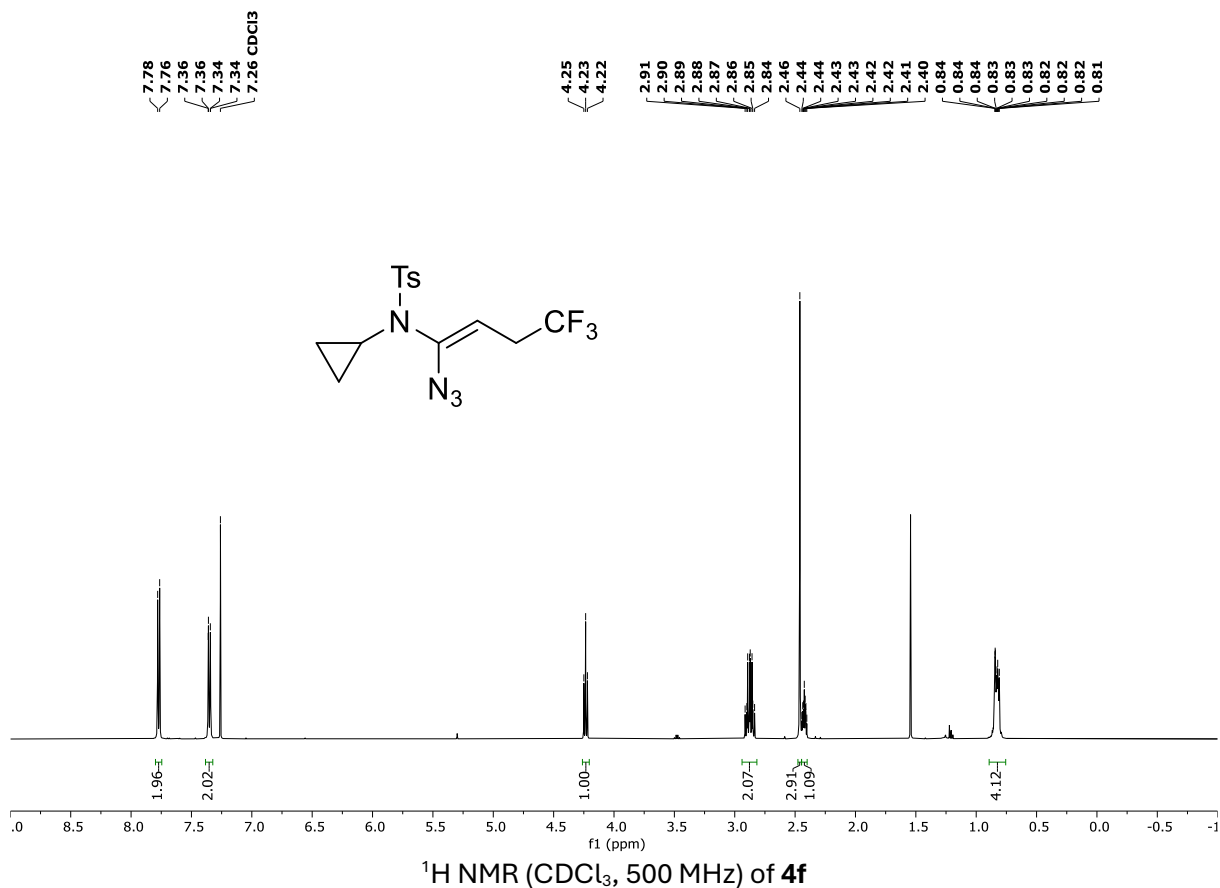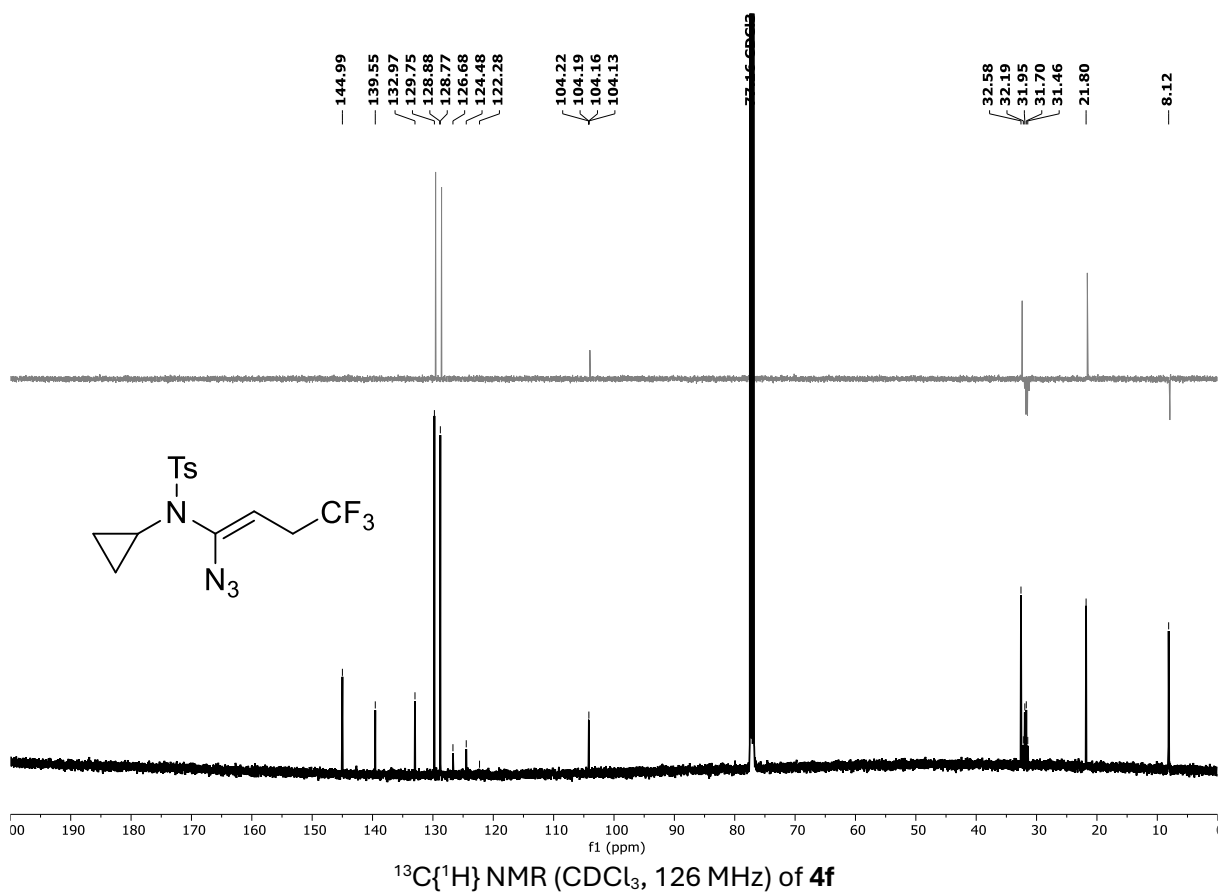



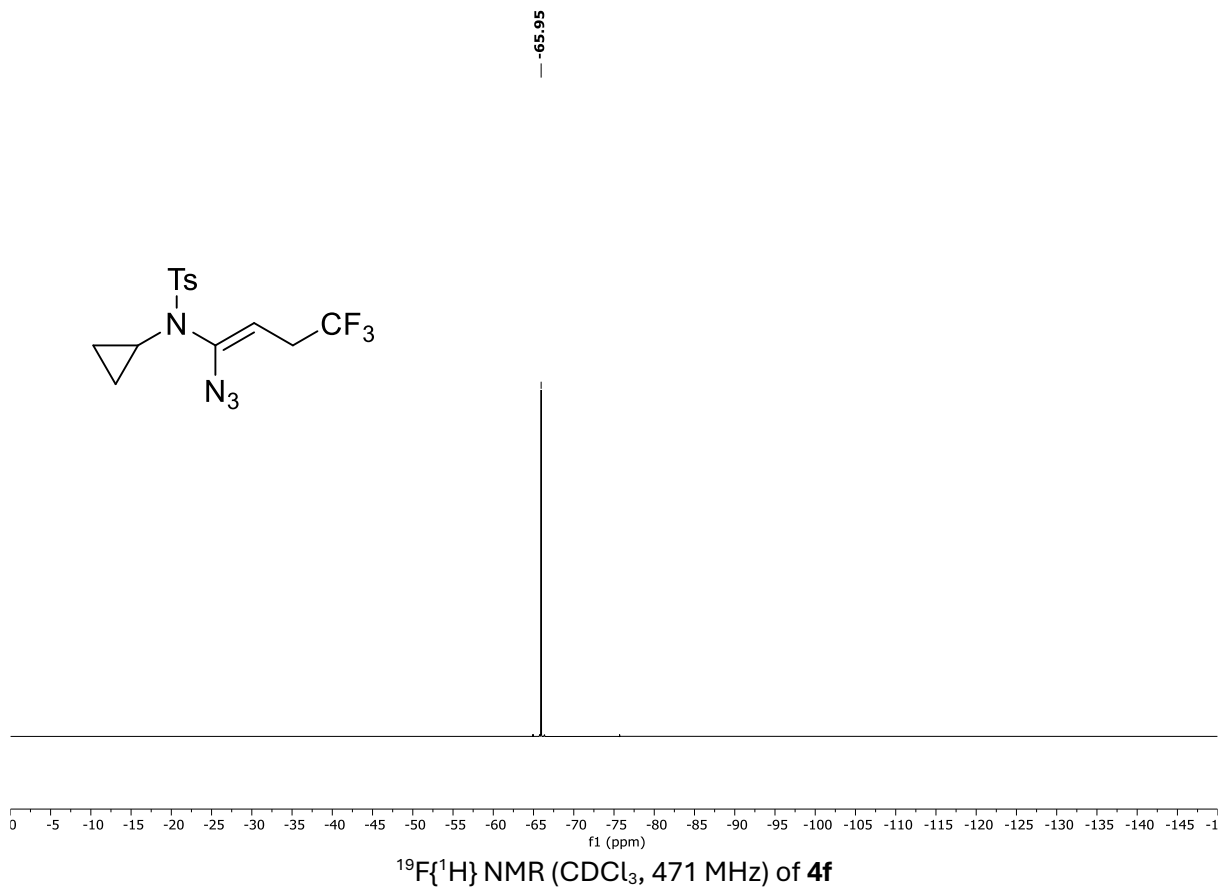

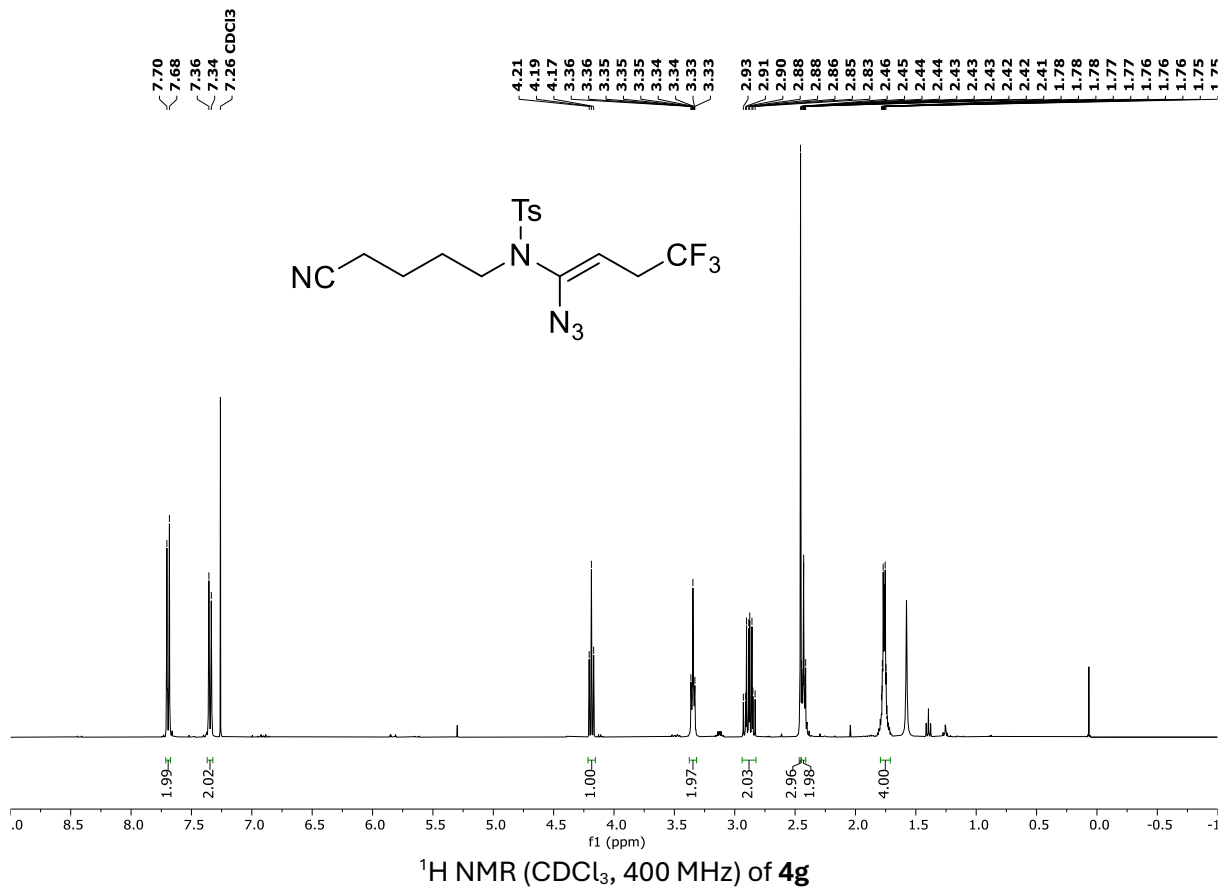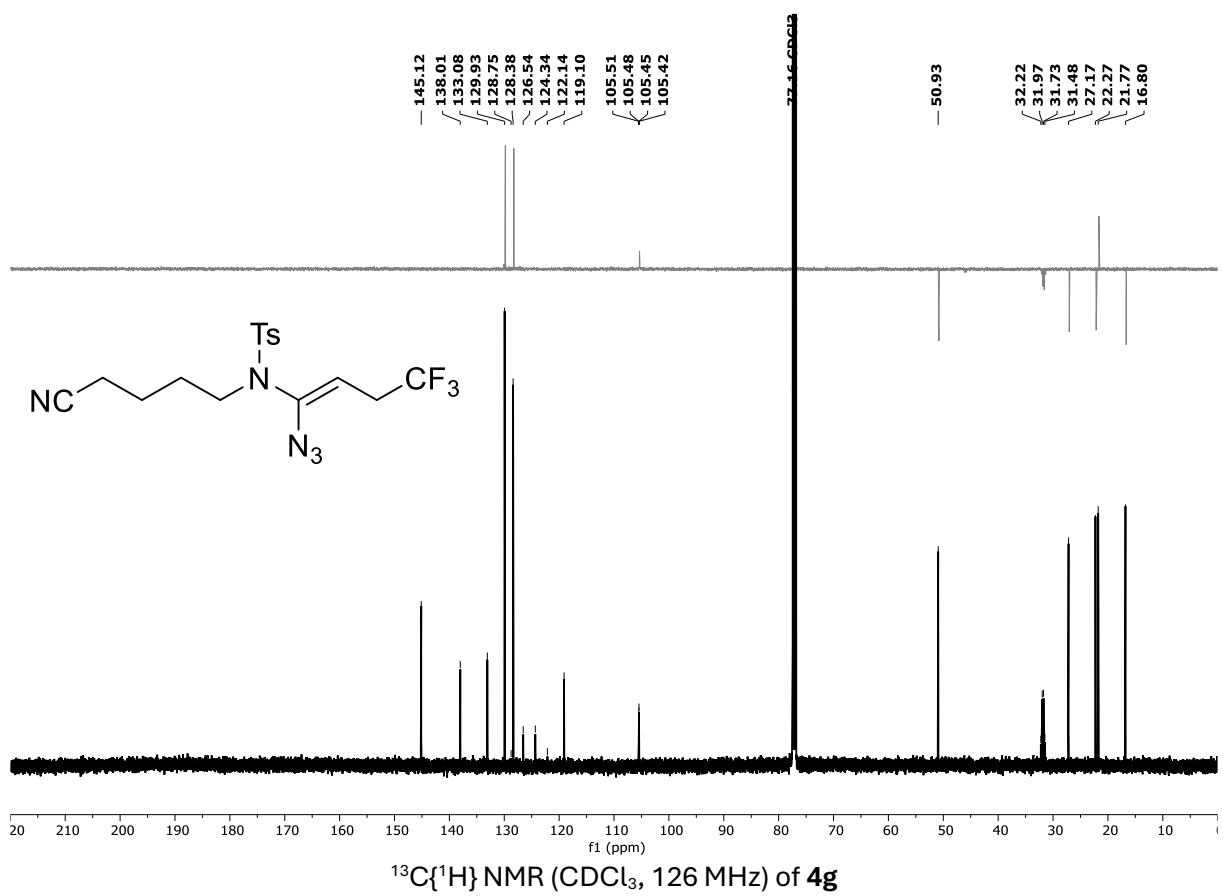

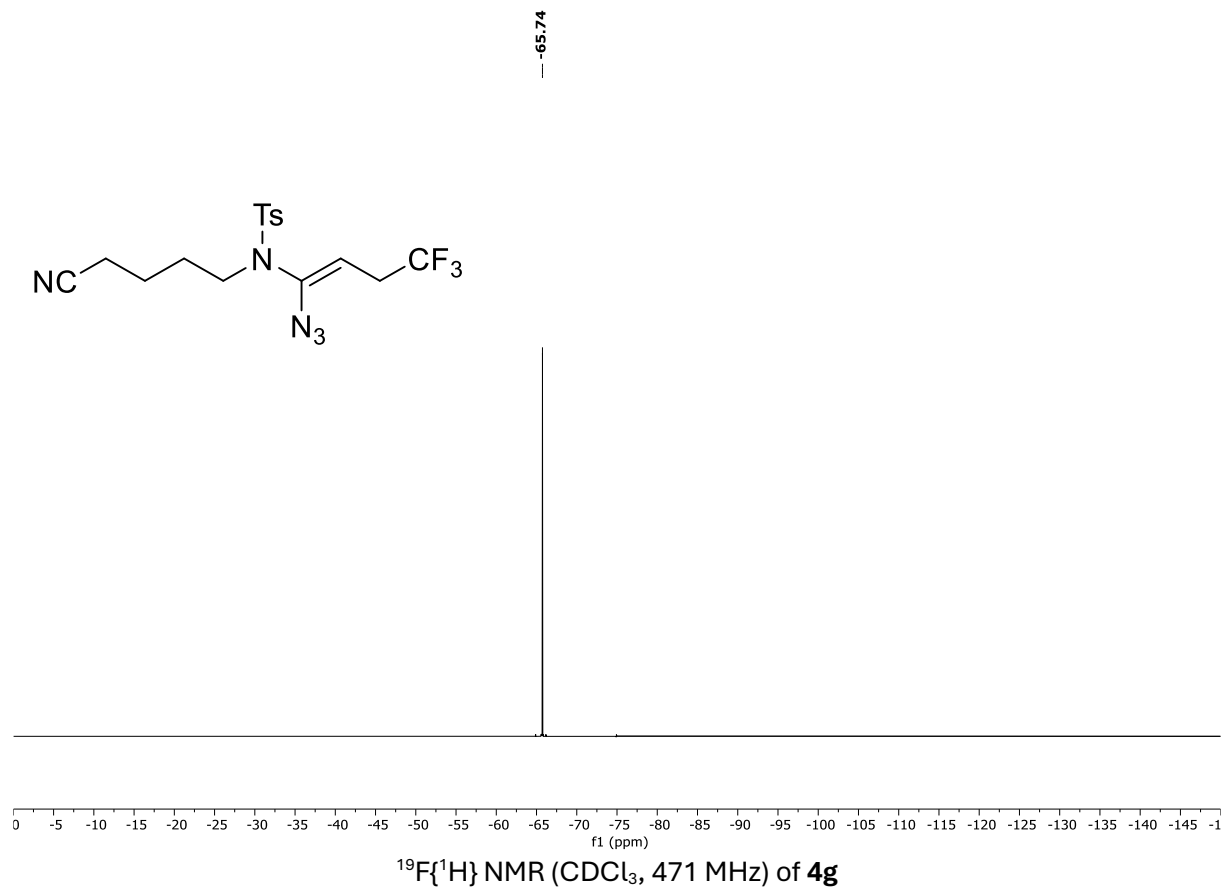

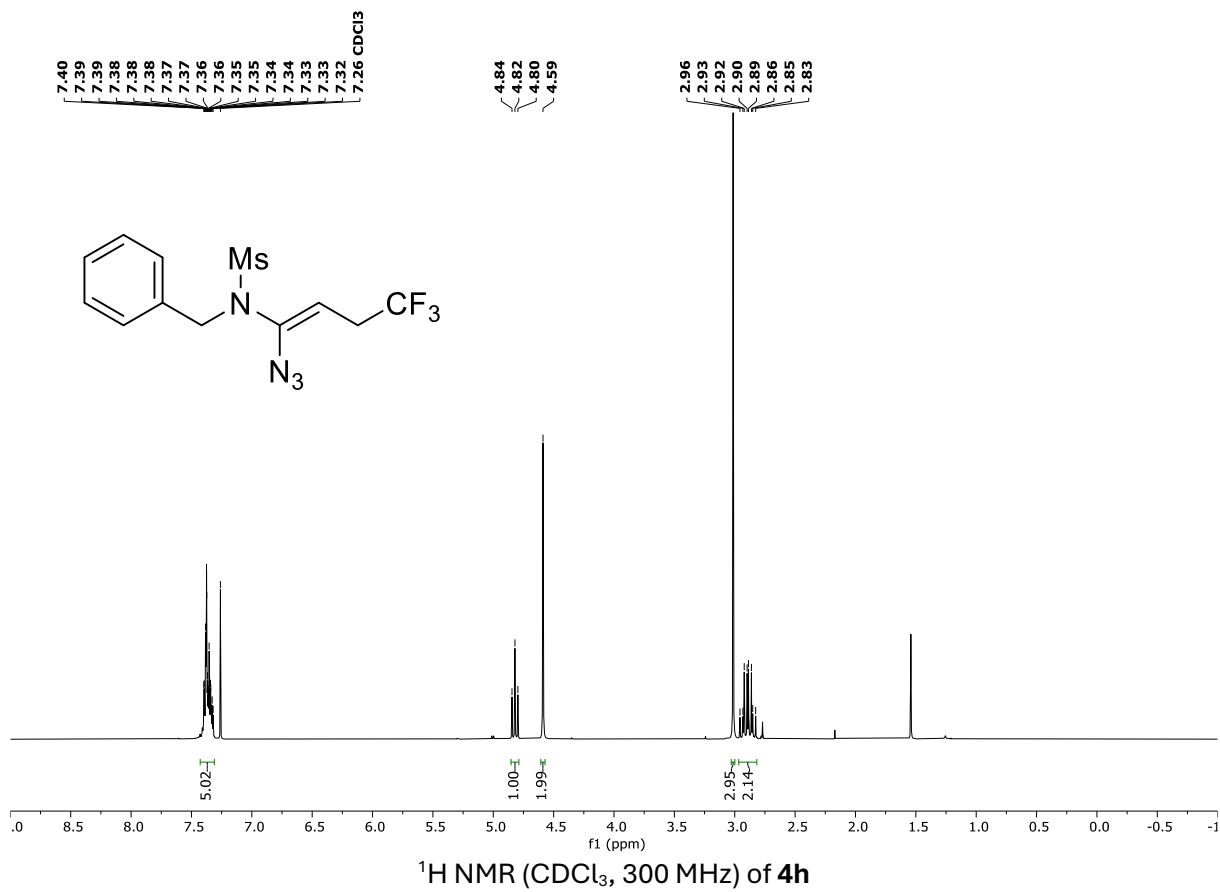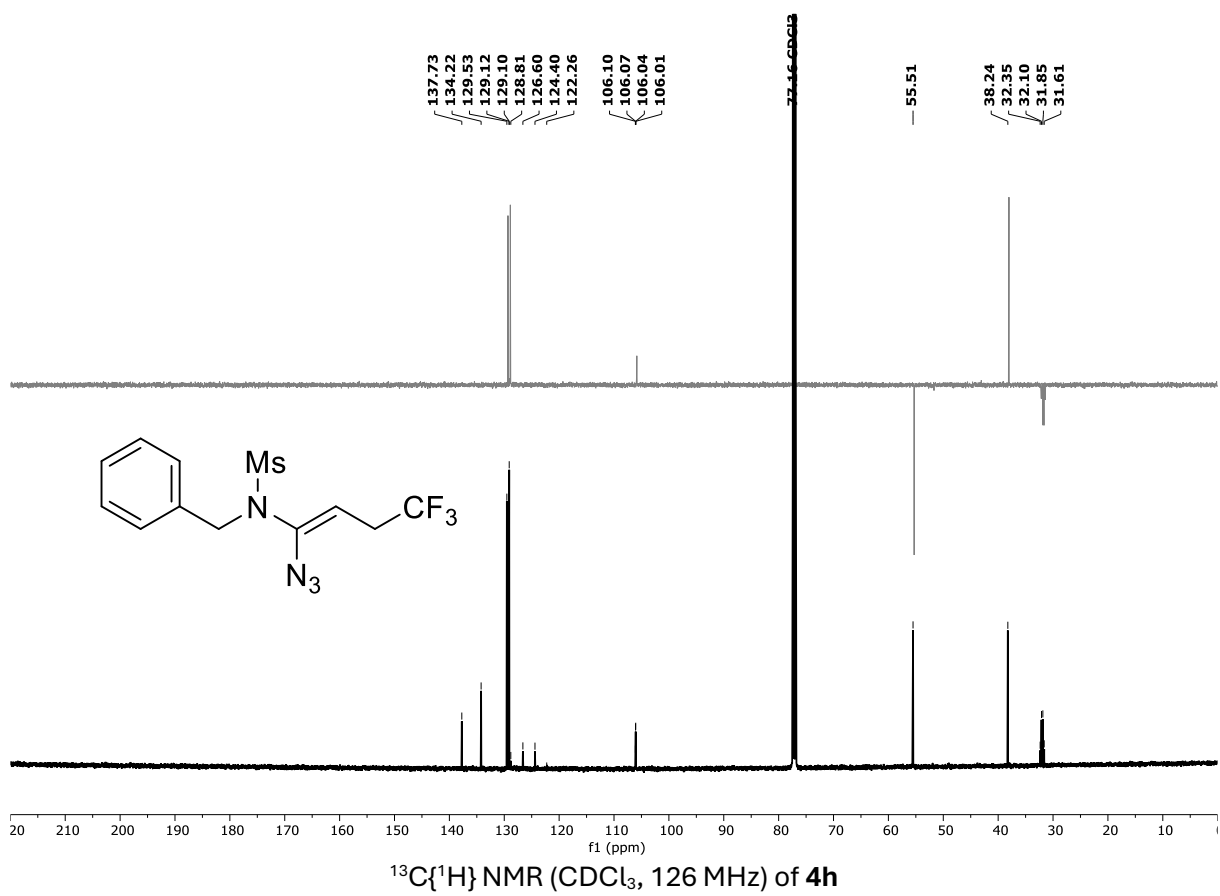

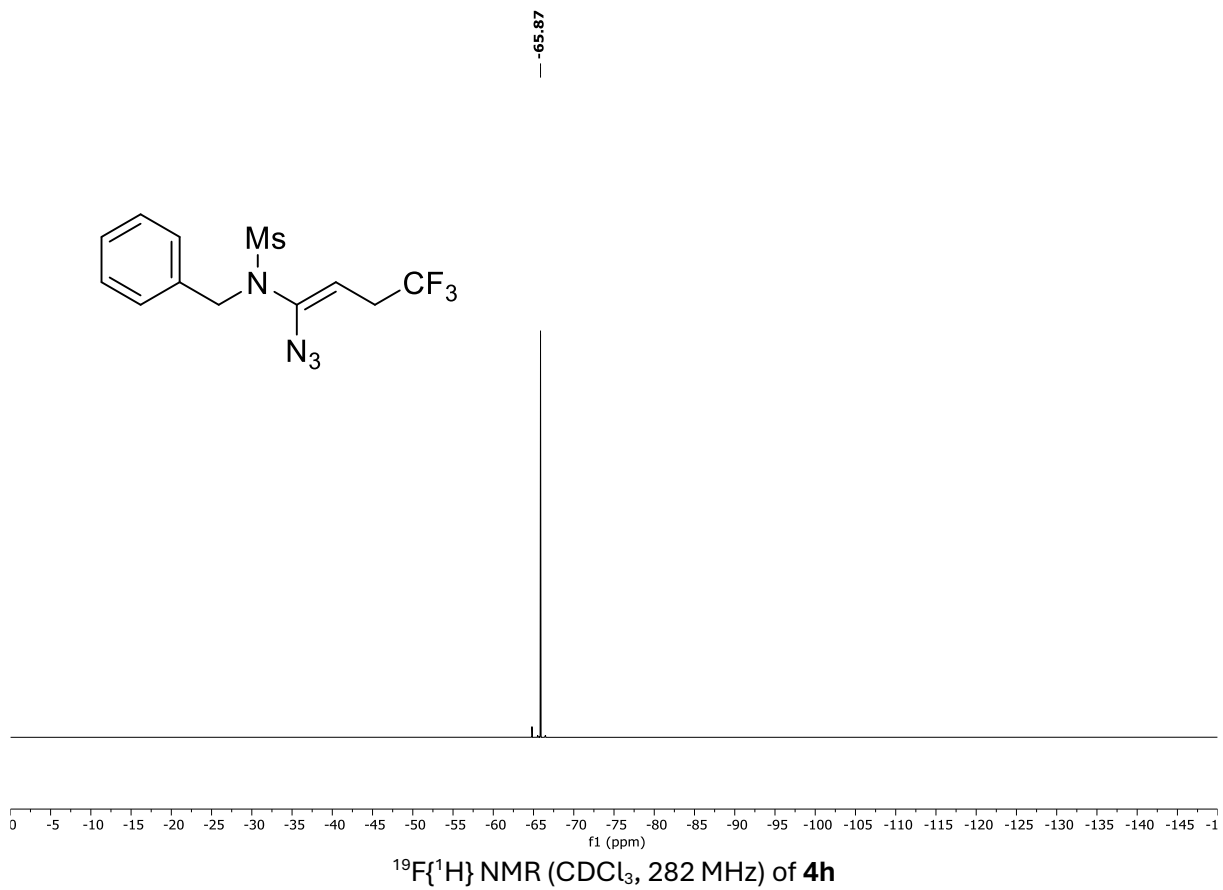

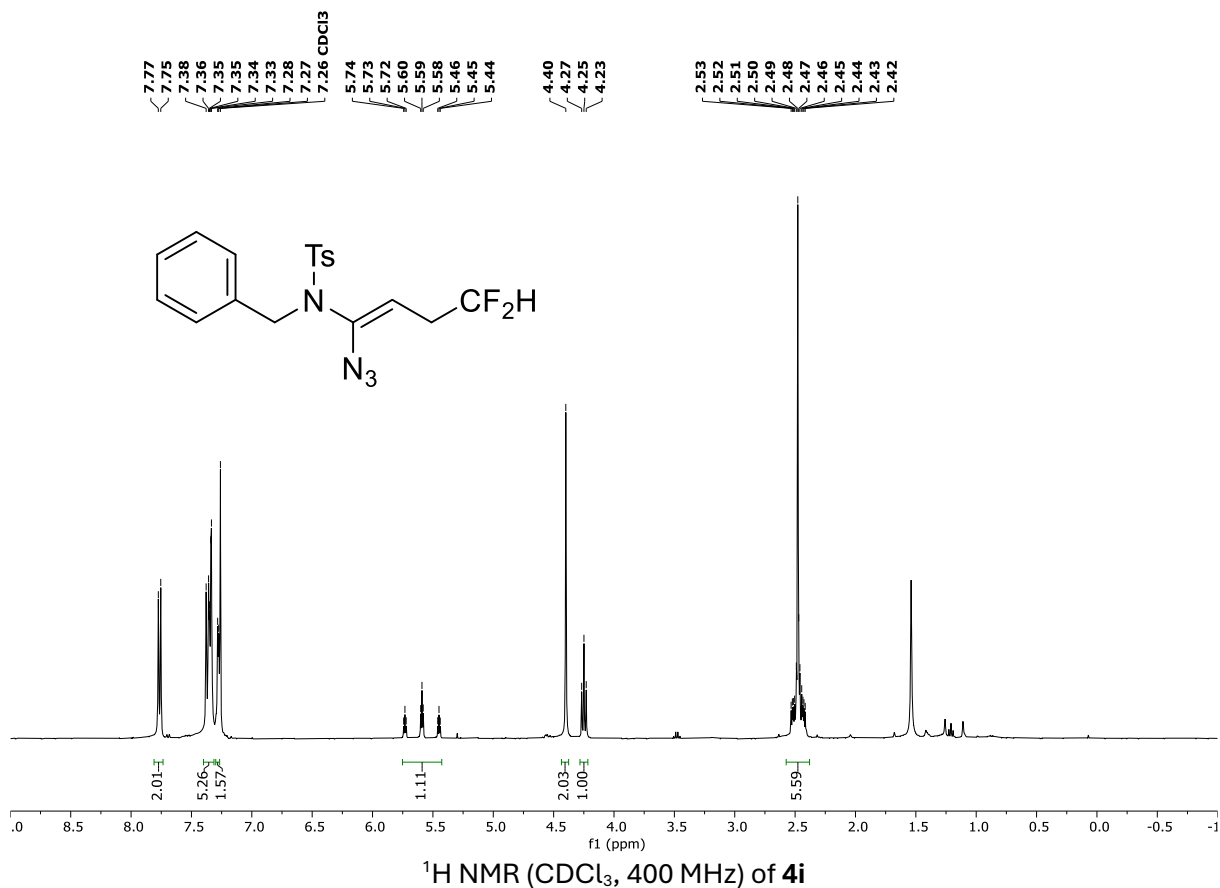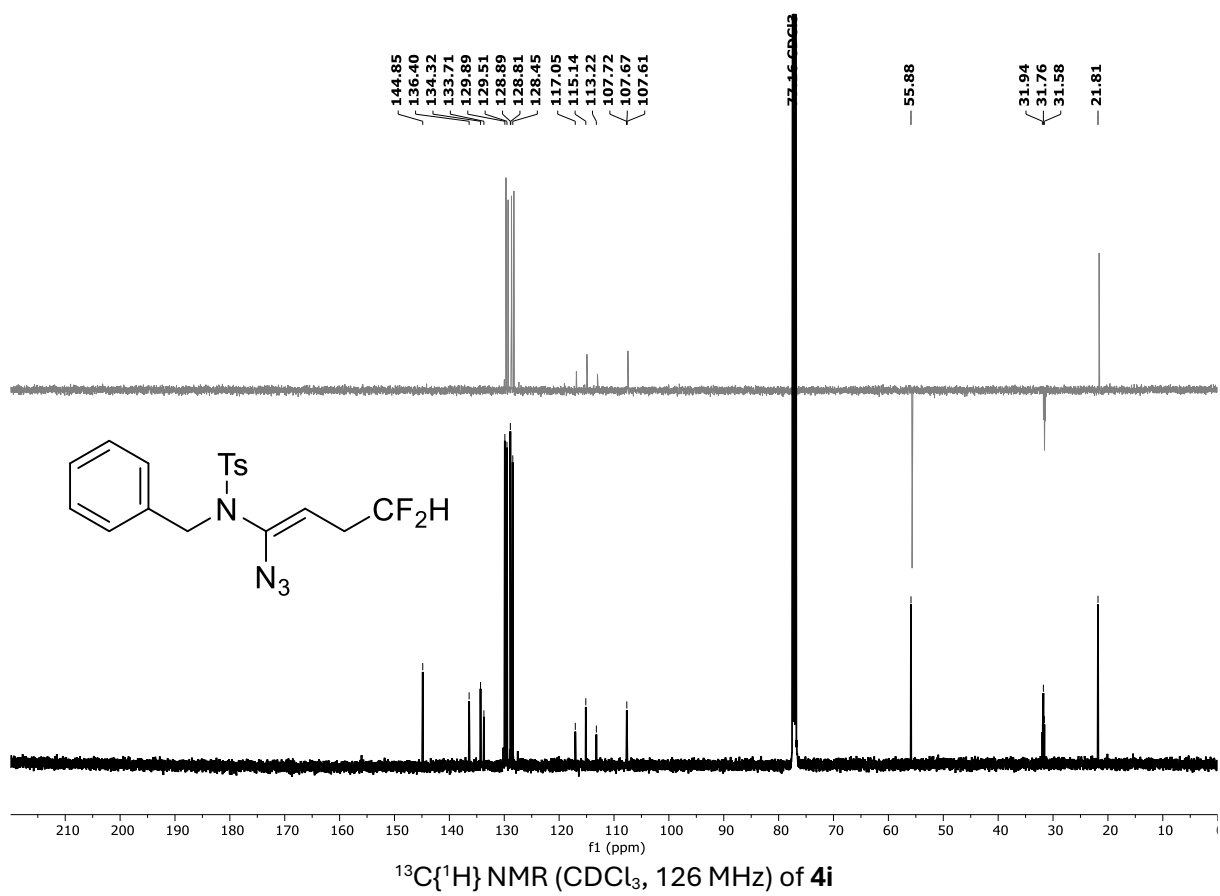

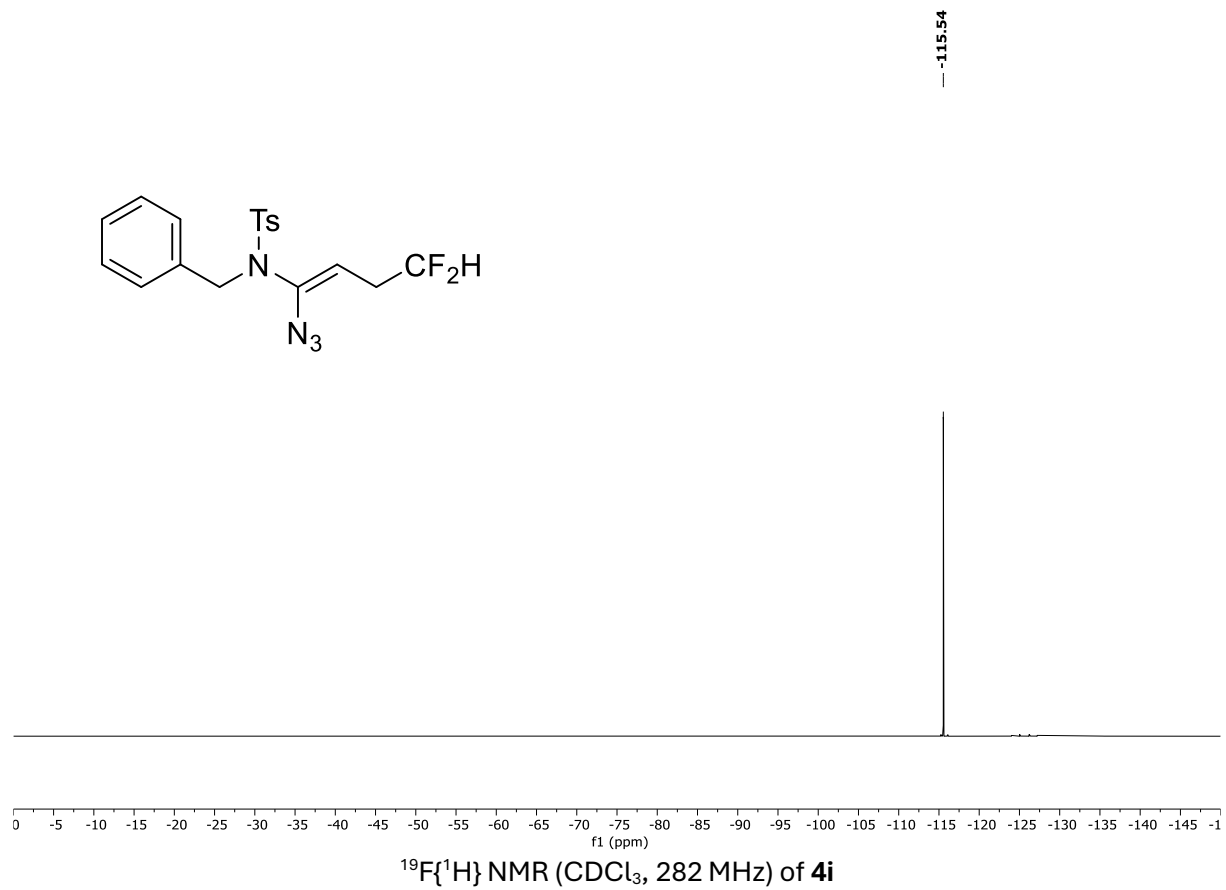

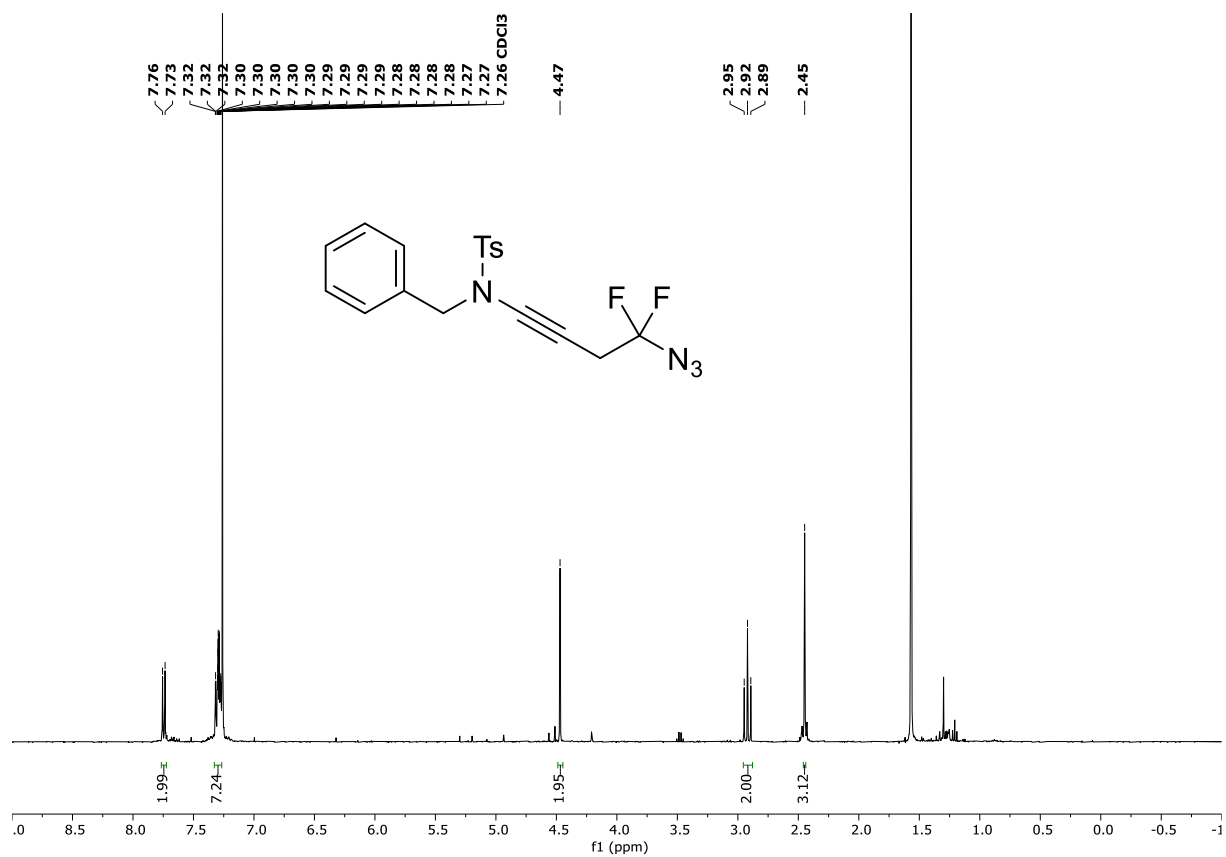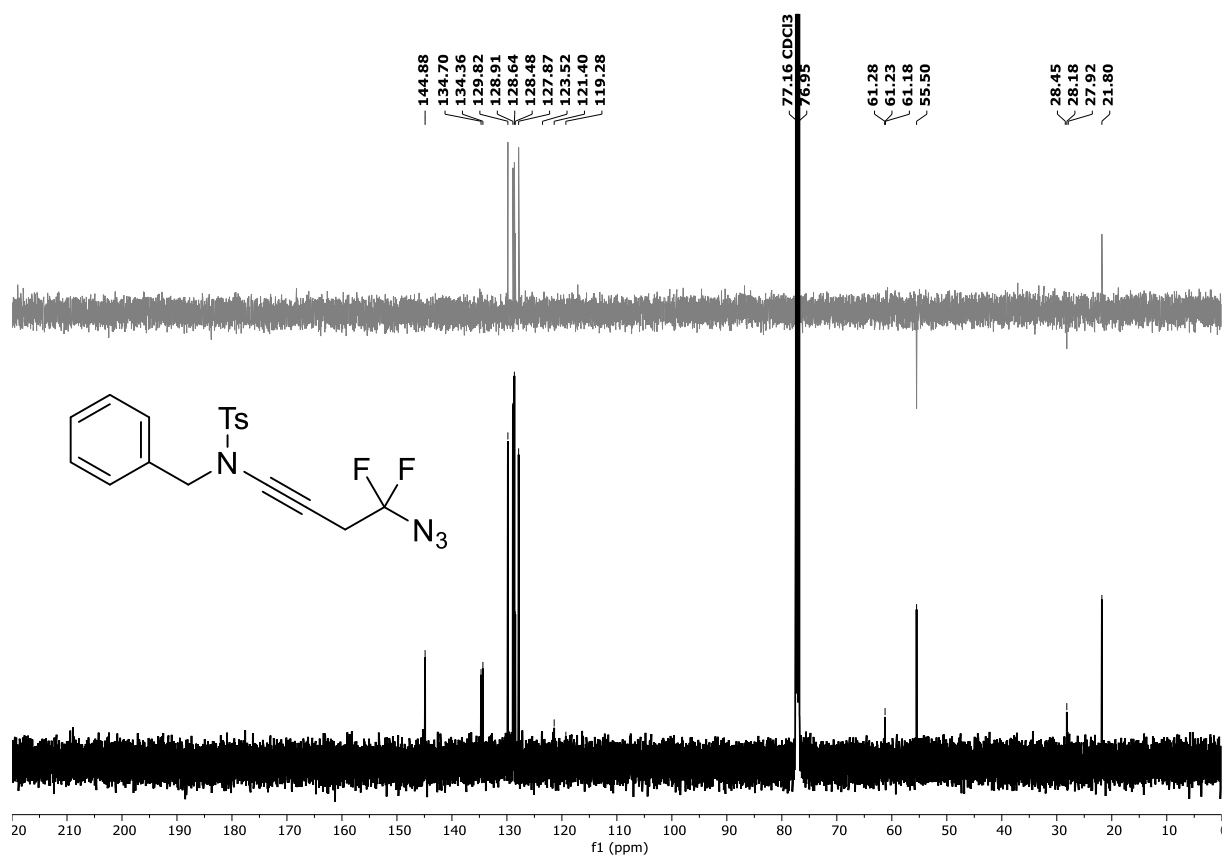



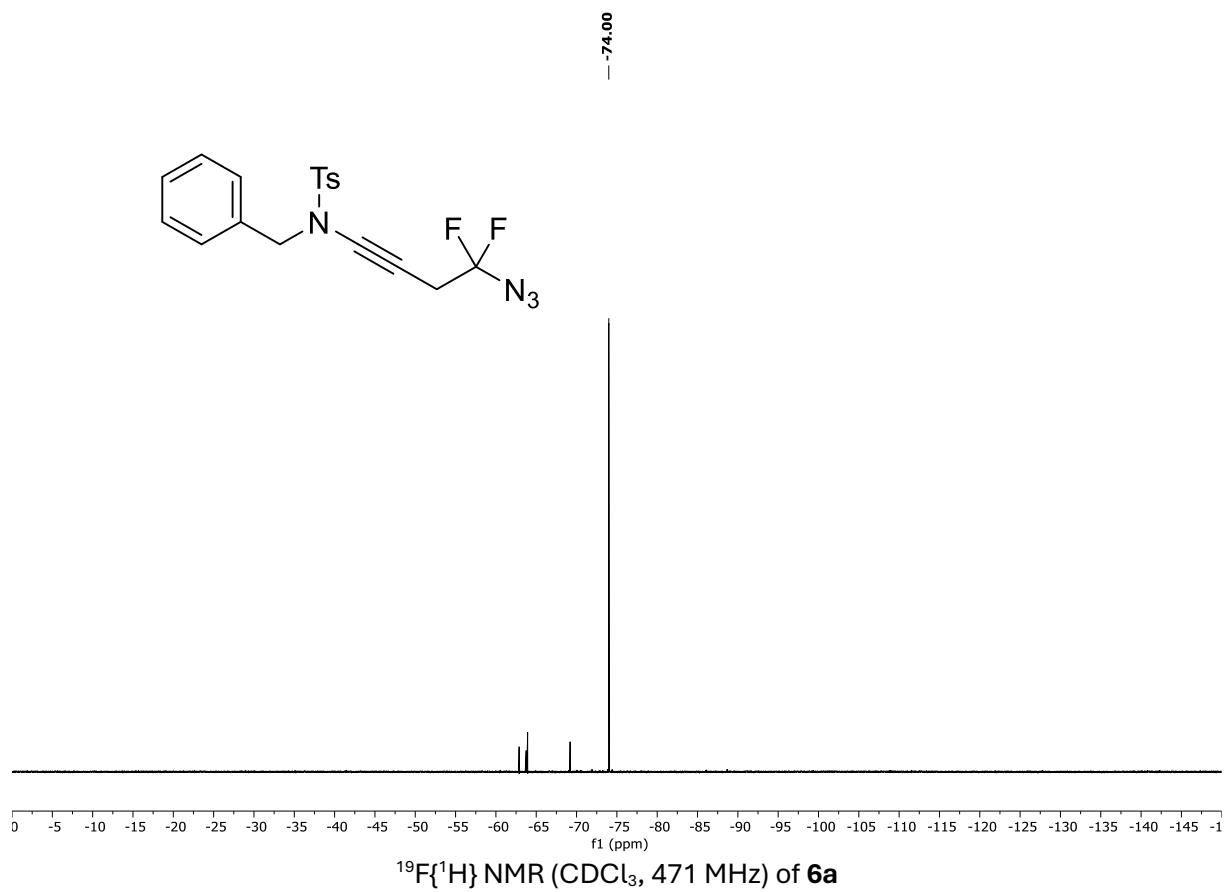

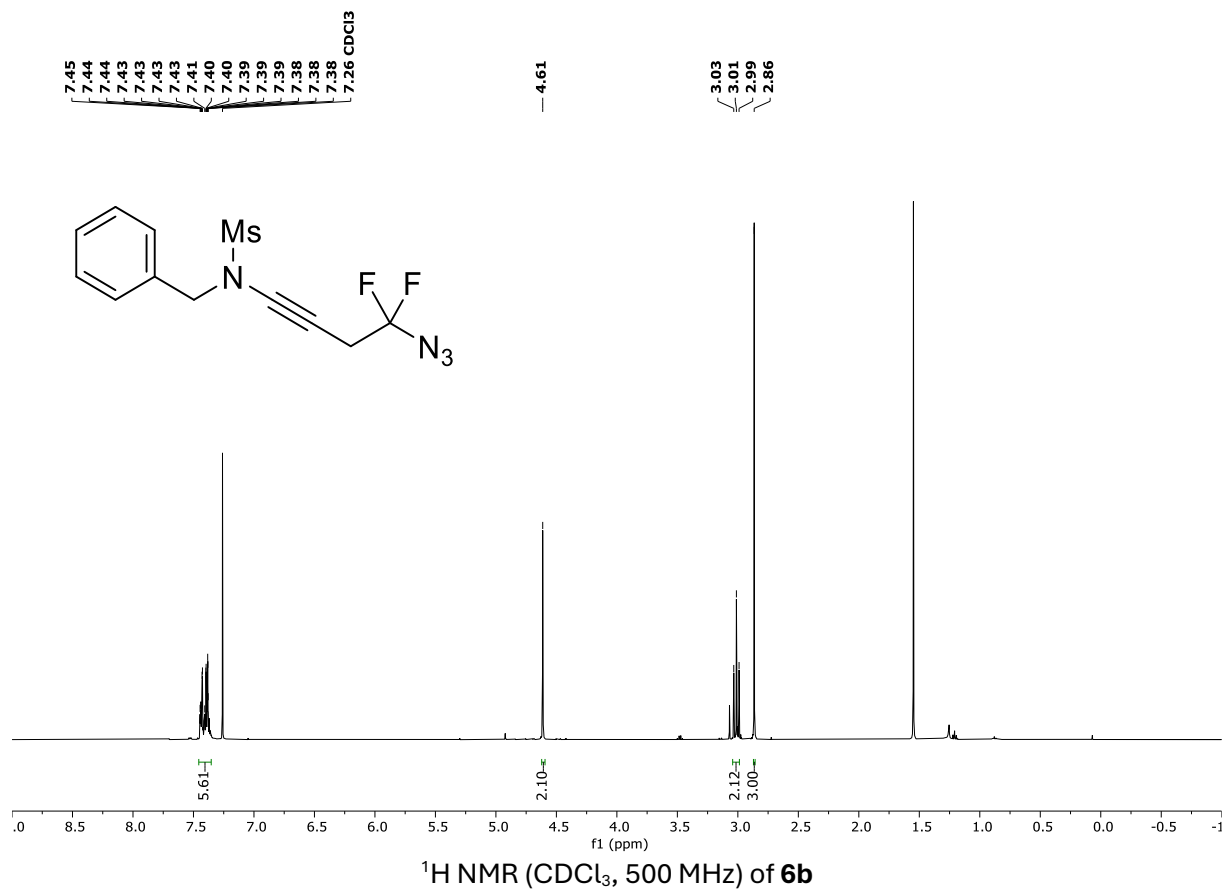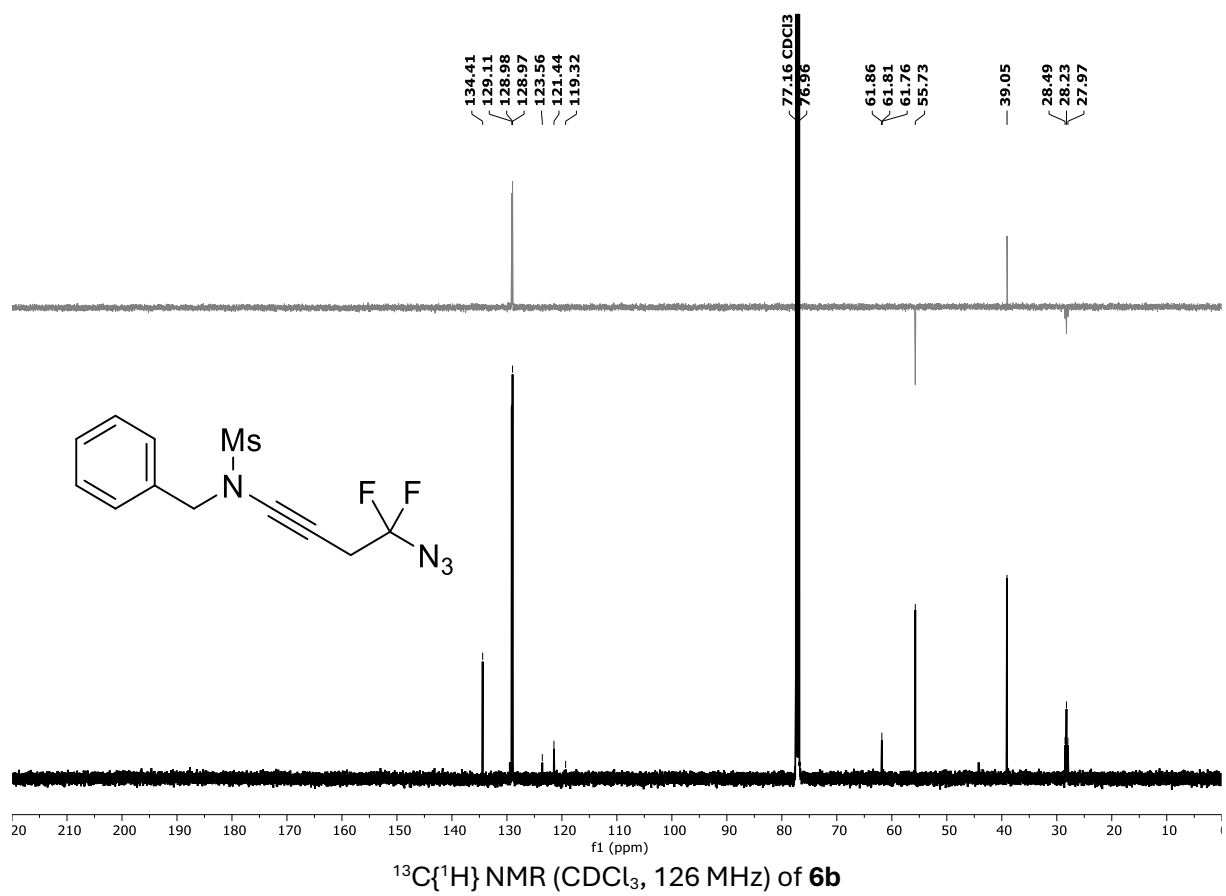

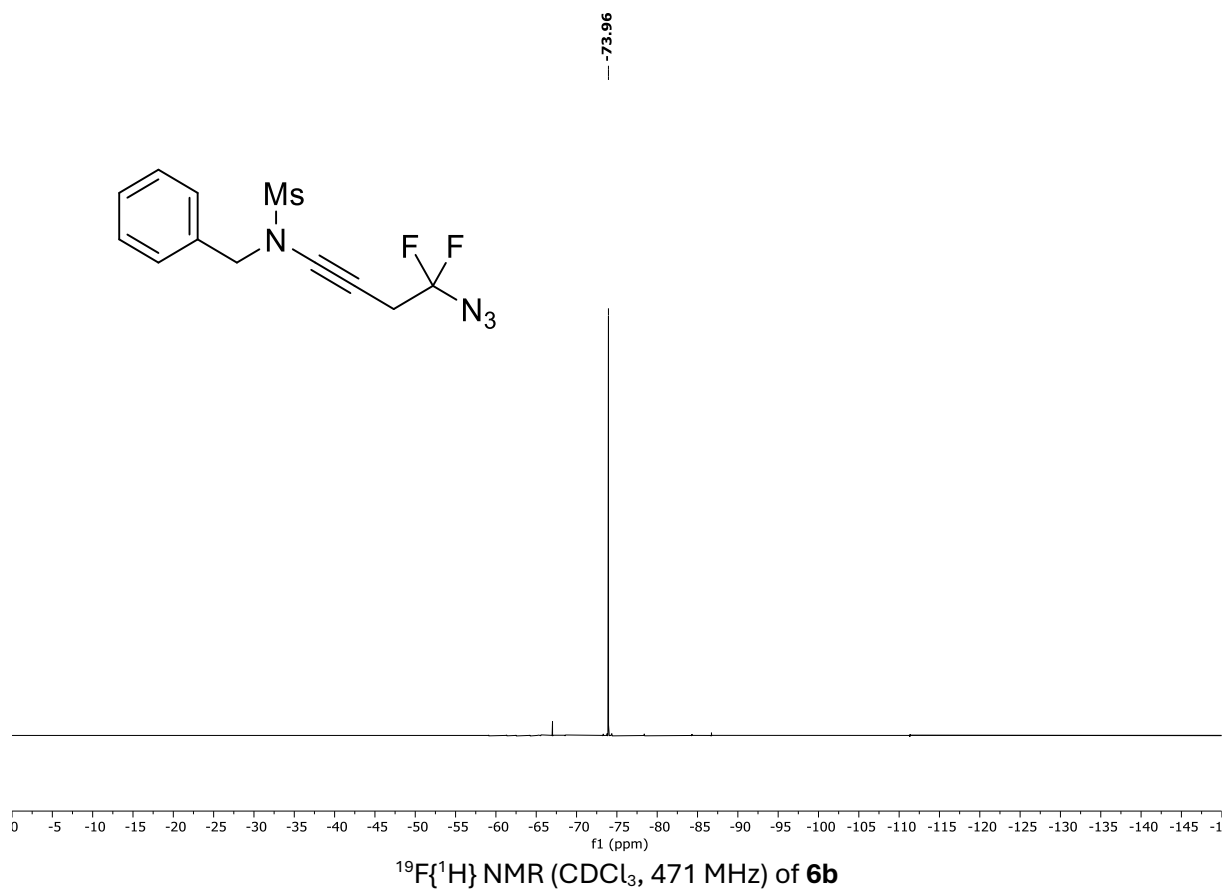

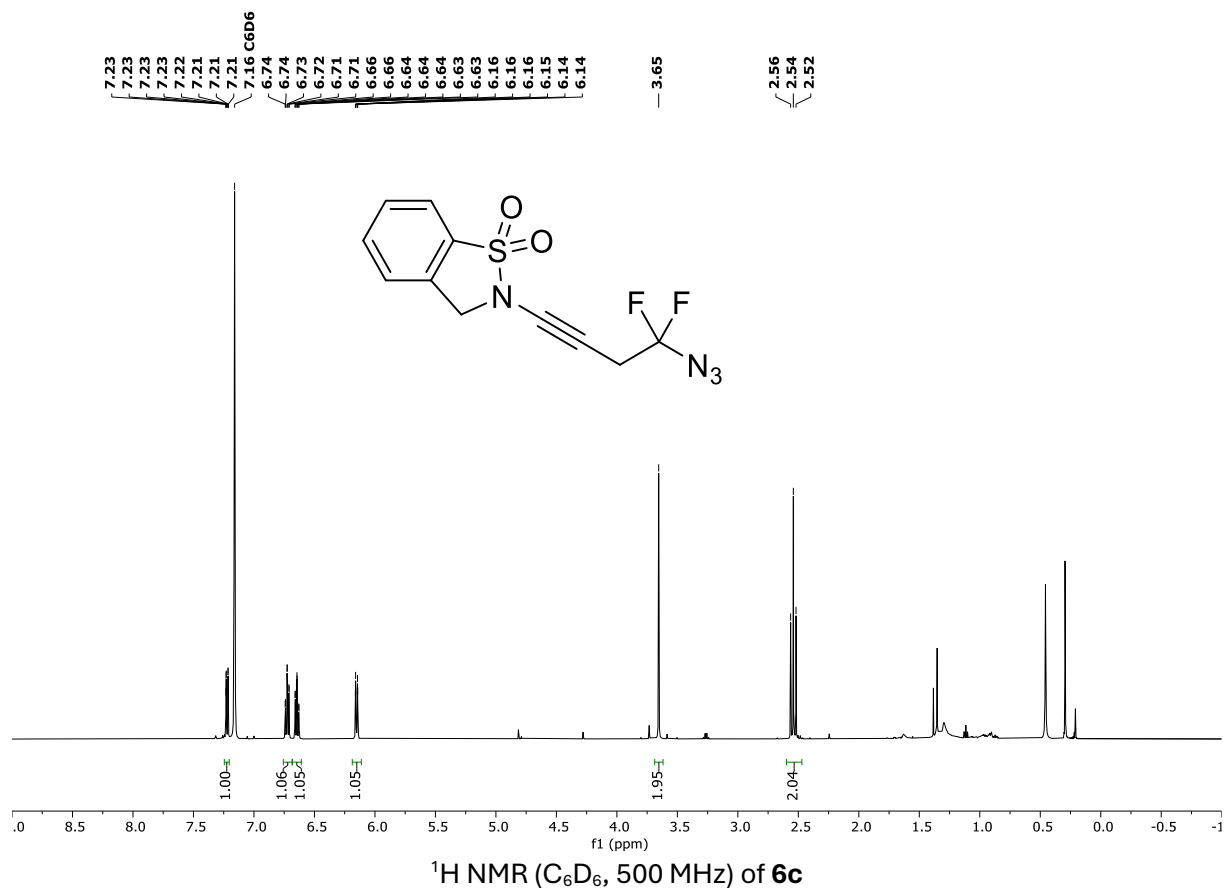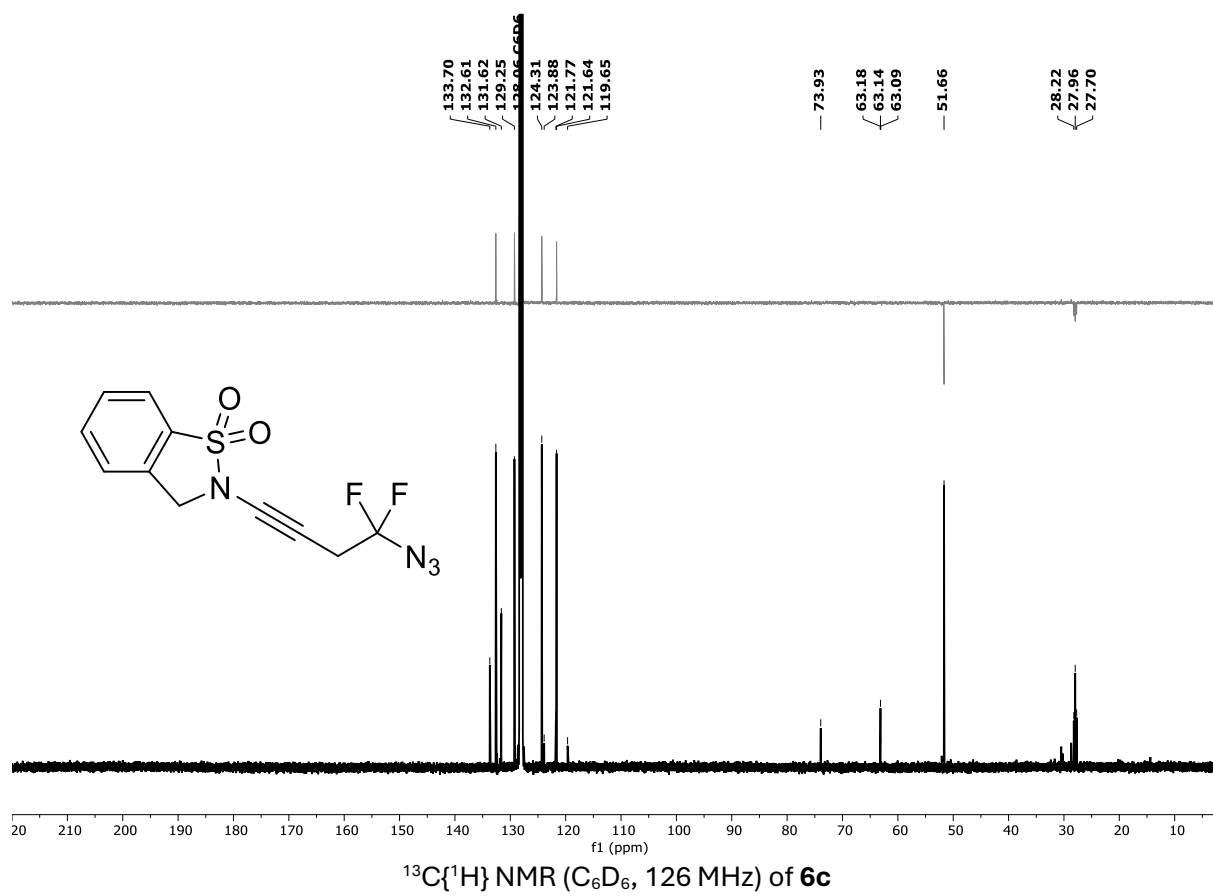

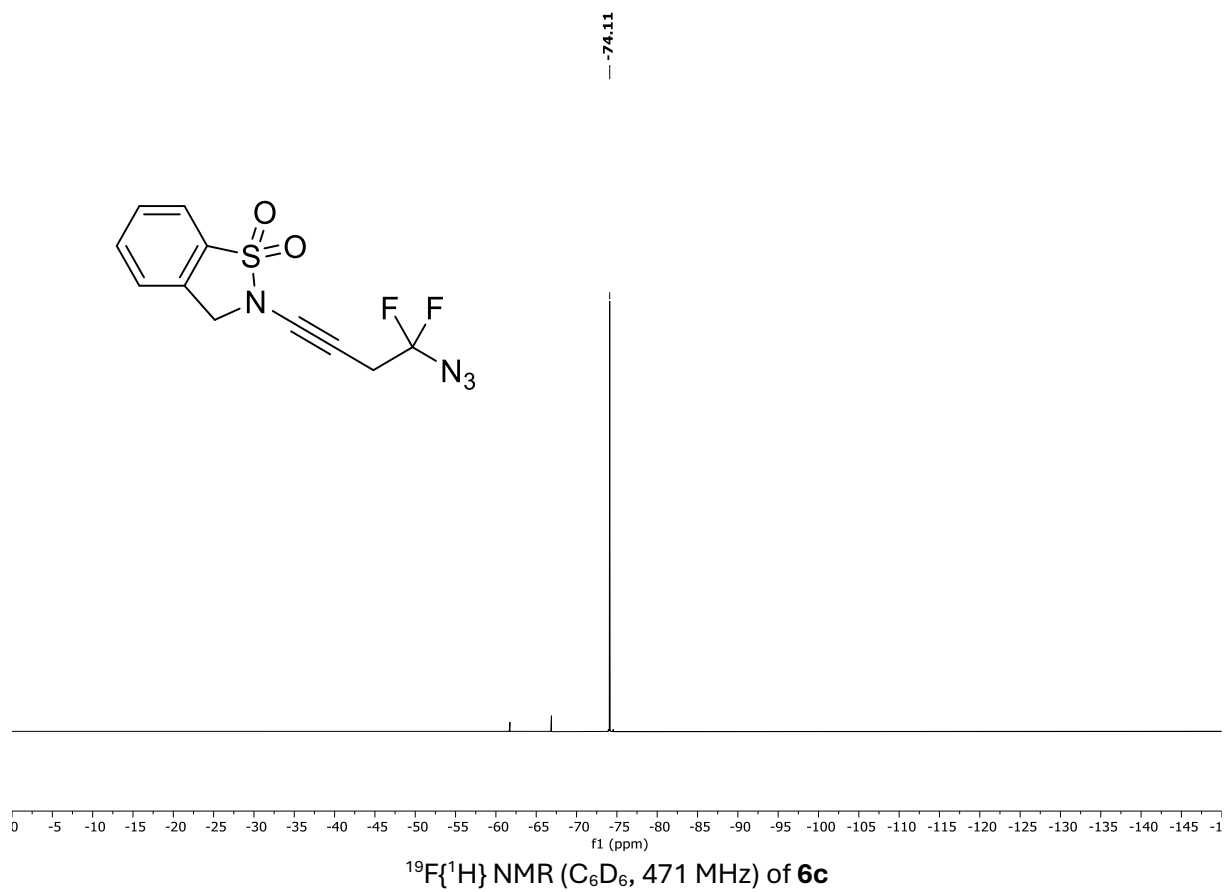

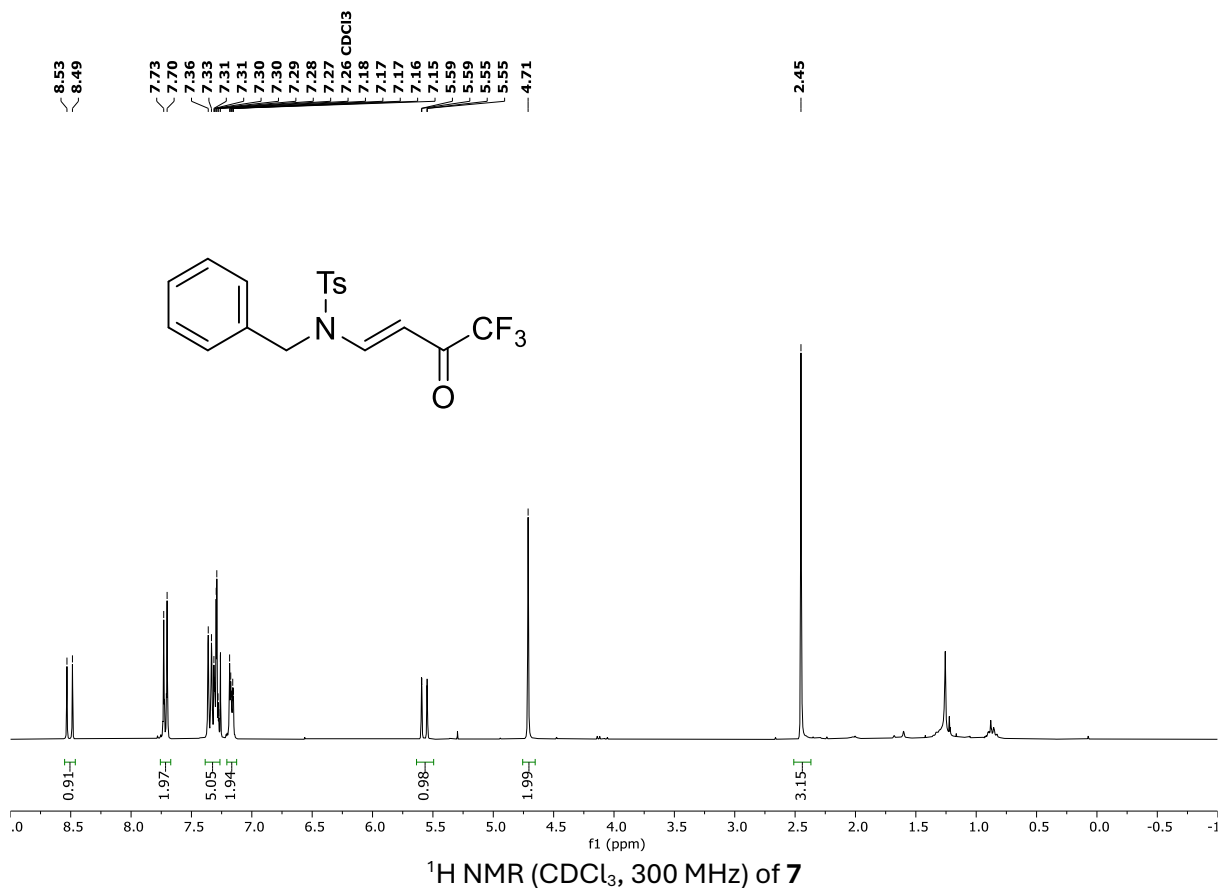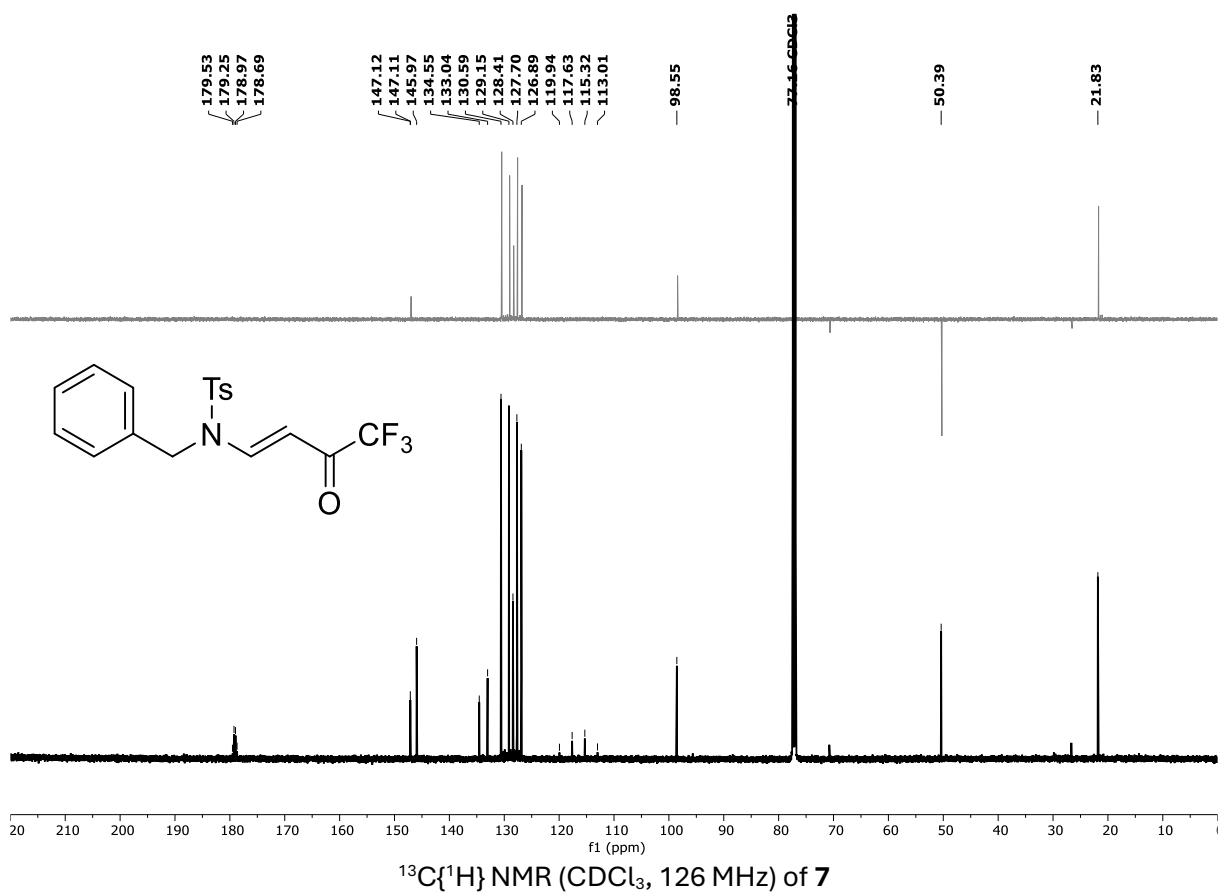

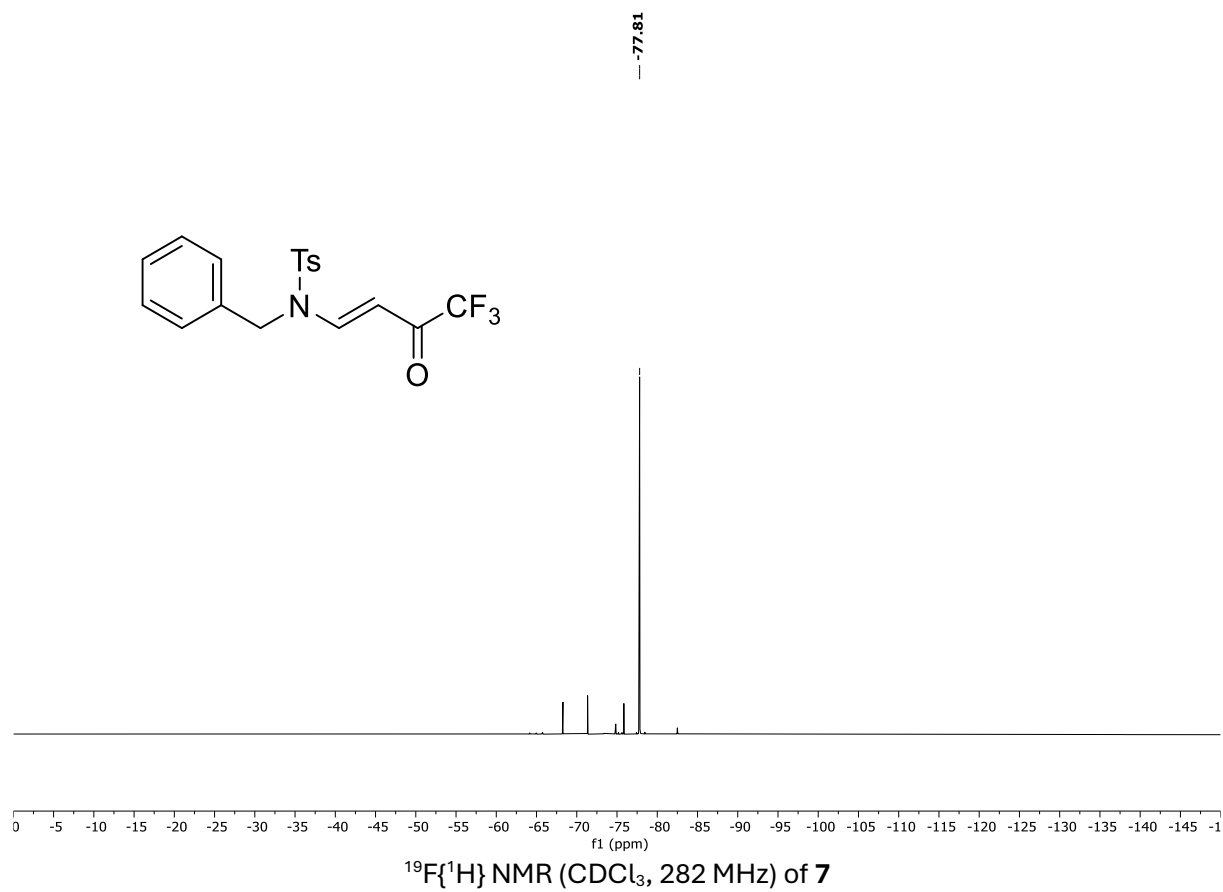

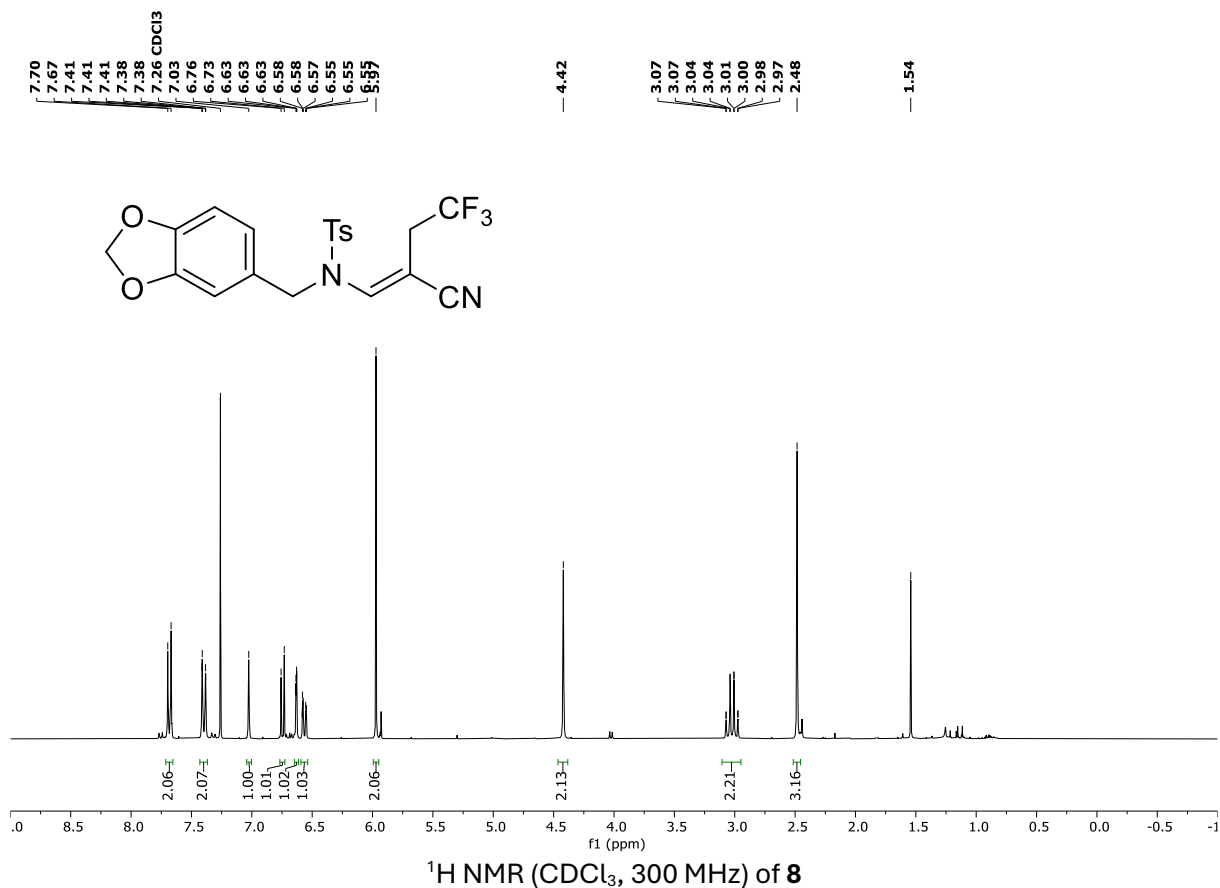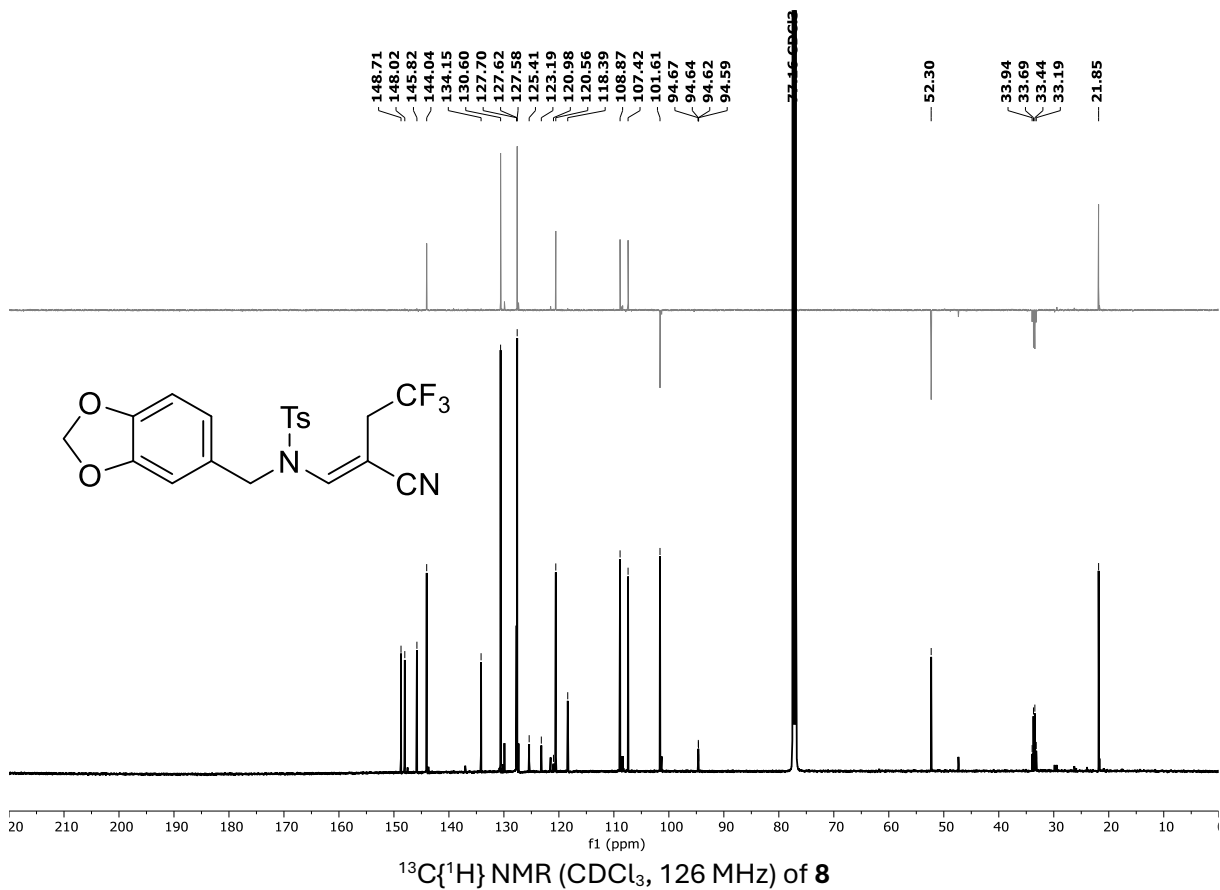



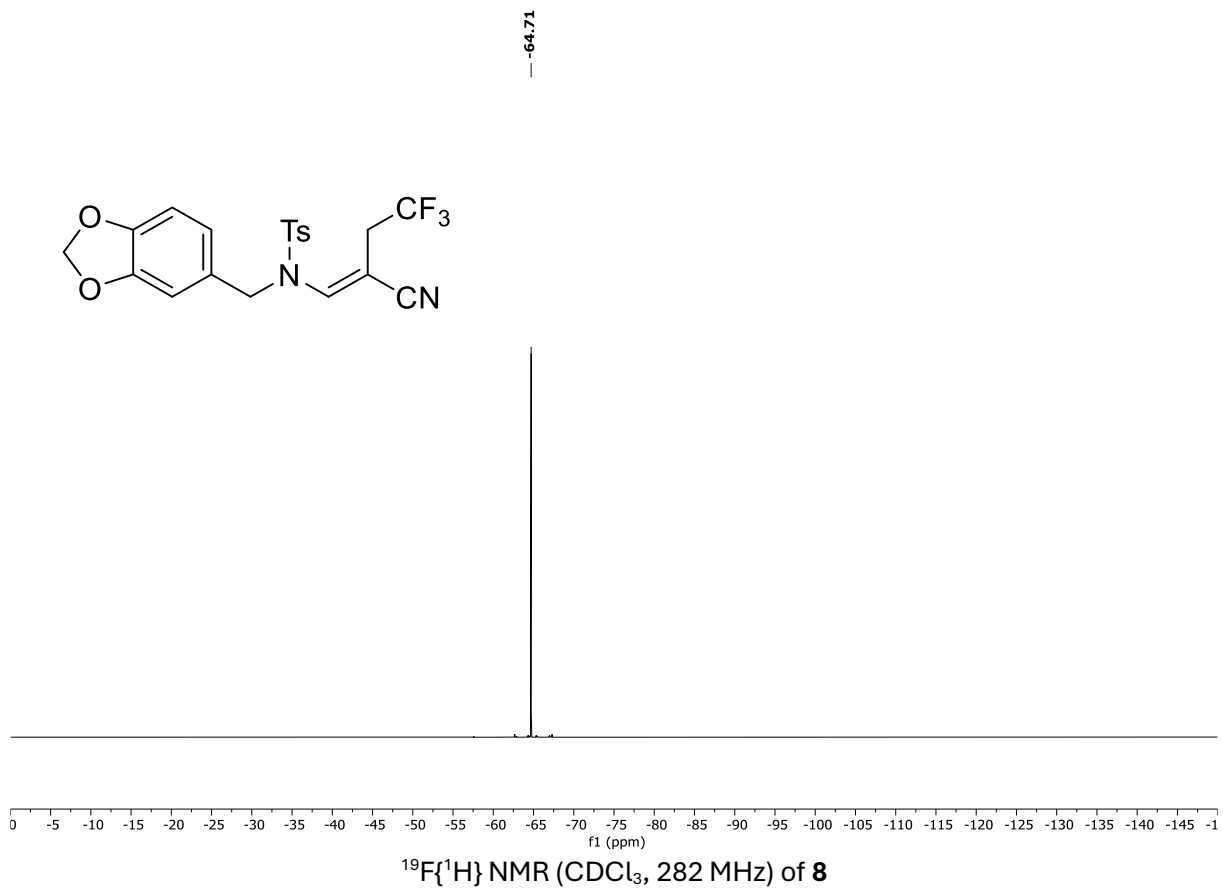

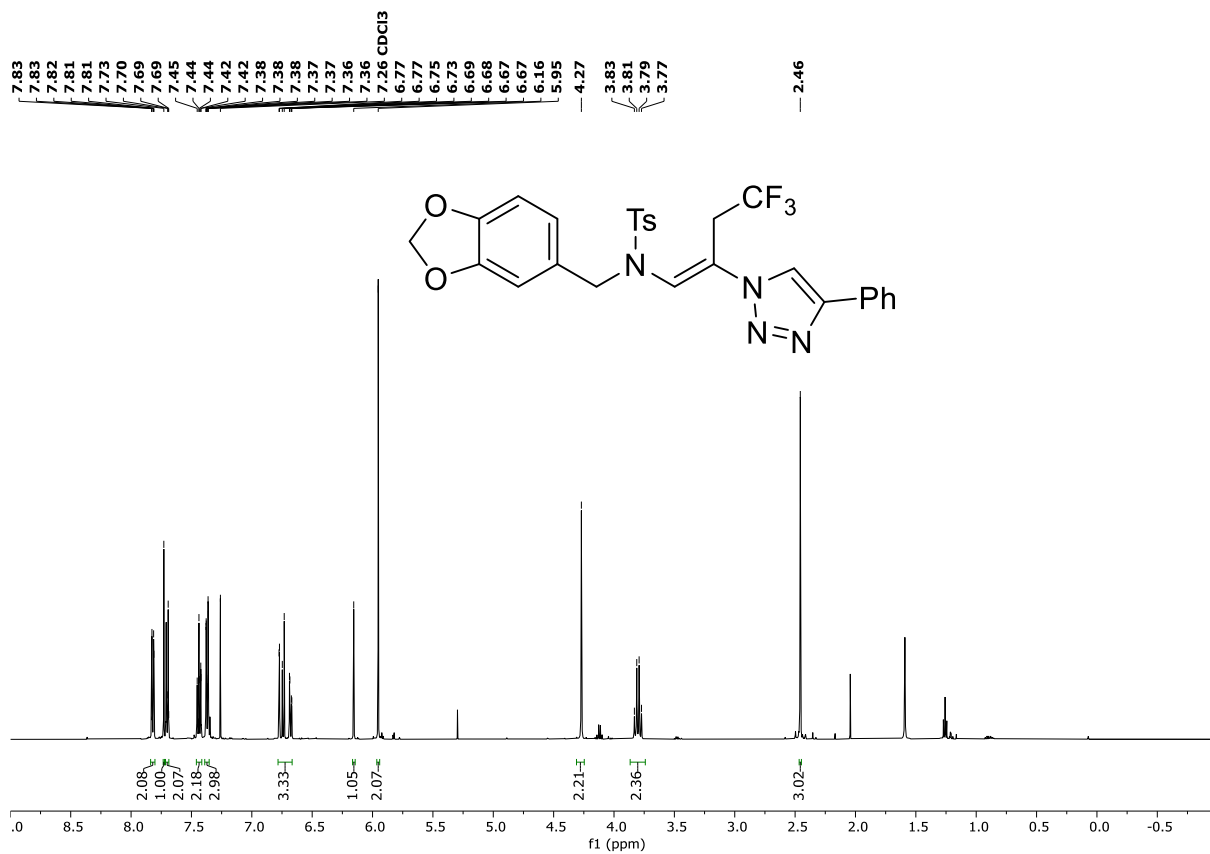

<sup>1</sup>H NMR (CDCl<sub>3</sub>, 500 MHz) of **9**

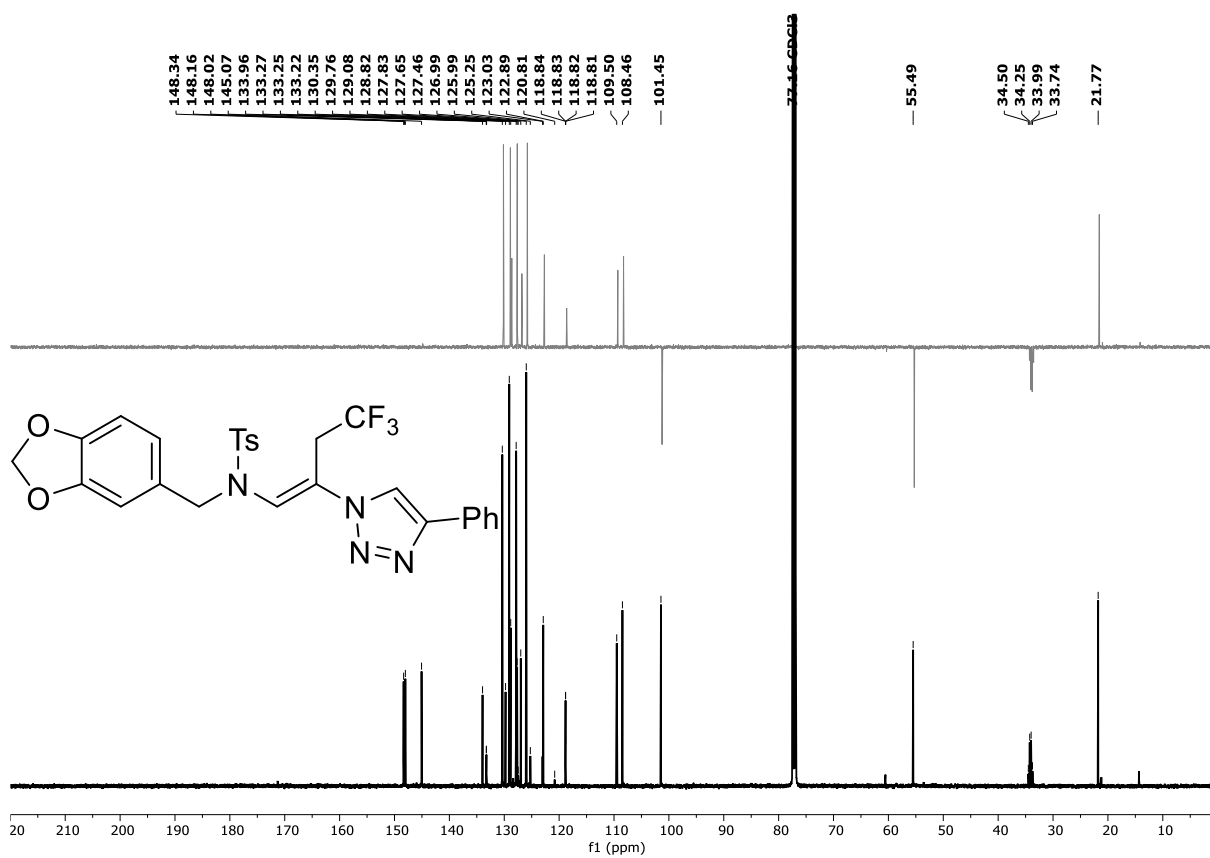

<sup>13</sup>C{<sup>1</sup>H} NMR (CDCl<sub>3</sub>, 126 MHz) of **9**

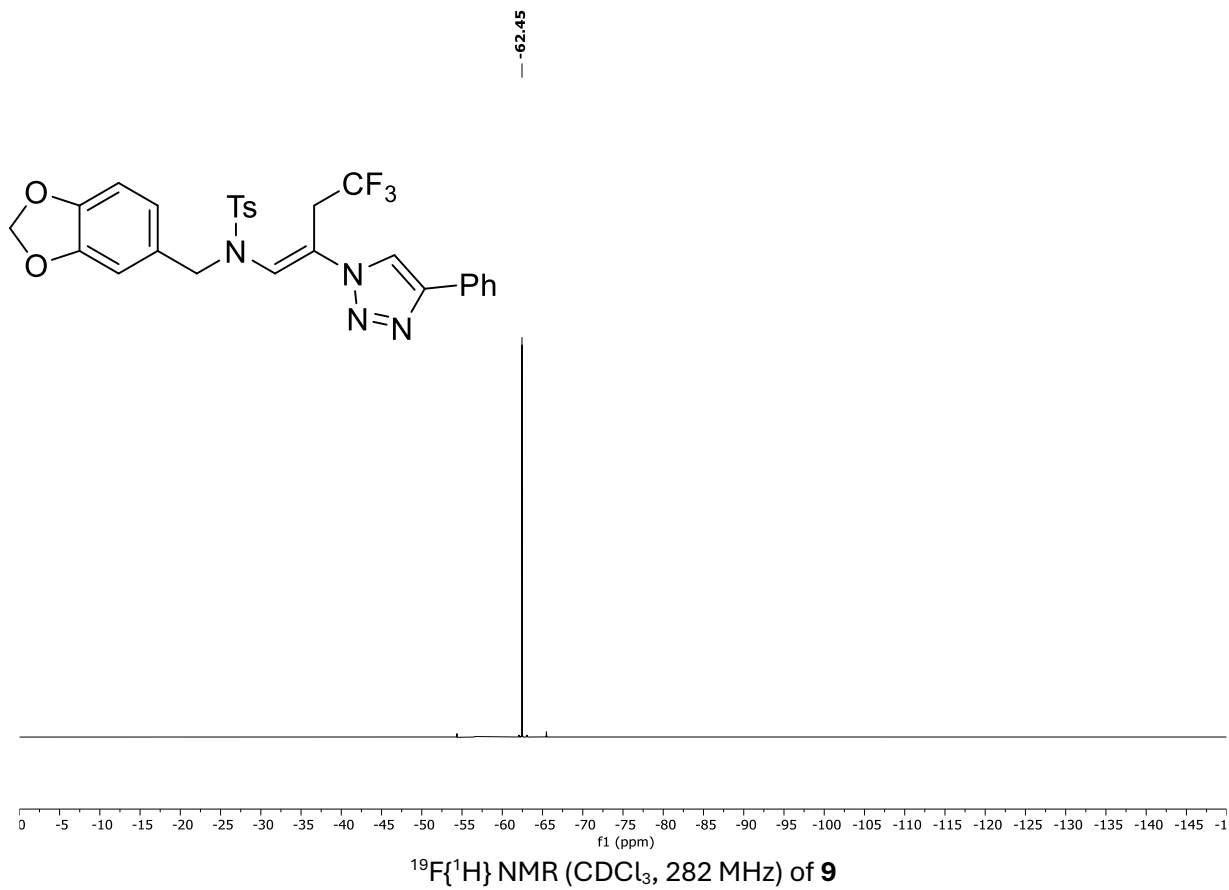

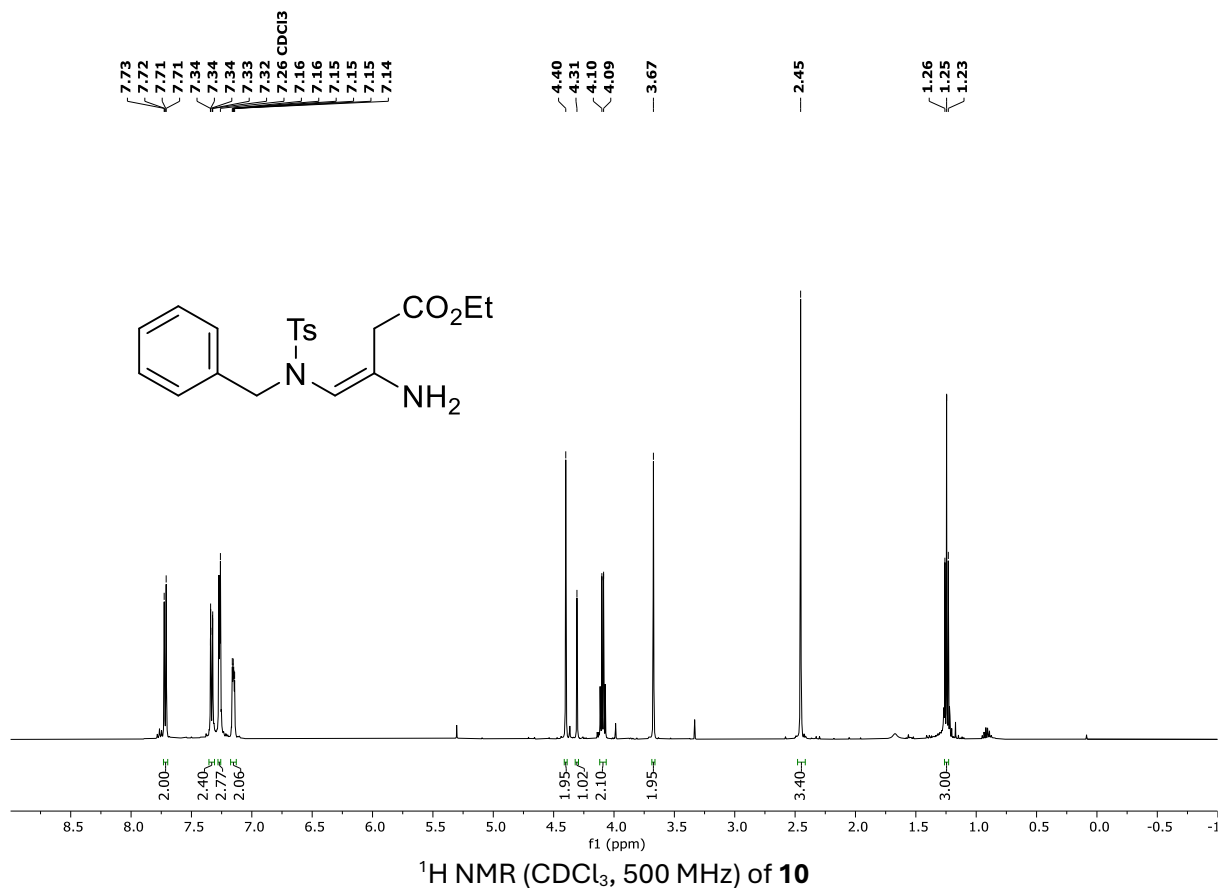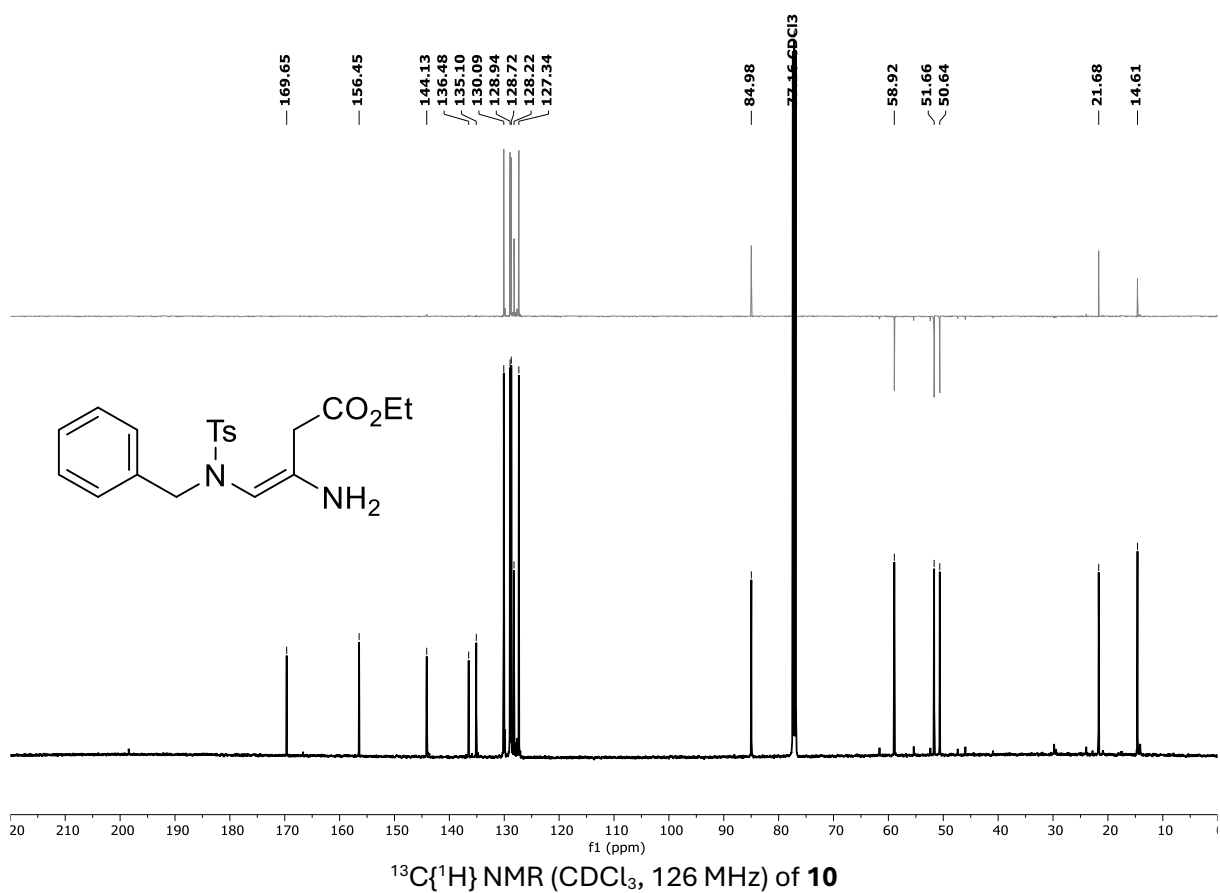

## X-Ray Crystallography data

CCDC **2384608** (**2c**) contains the supplementary crystallographic data for this paper. These data can be obtained free of charge from the Cambridge crystallographic Data Centre. Compound **2c** was dissolved in a 0.5 mL CH<sub>2</sub>Cl<sub>2</sub>, and *n*-hexane 2 mL were added. The sample was maintained at 4 °C for several days. Crystals were obtained through diffusion.

CCDC **2384809** (**2l**) contains the supplementary crystallographic data for this paper. These data can be obtained free of charge from the Cambridge crystallographic Data Centre. Compound **2l** was dissolved in a 0.5 mL CH<sub>2</sub>Cl<sub>2</sub>, and *n*-hexane 2 mL were added. The sample was maintained at 4 °C for several days. Crystals were obtained through diffusion.

CCDC **2384604** (**4a**) contains the supplementary crystallographic data for this paper. These data can be obtained free of charge from the Cambridge crystallographic Data Centre. Compound **4a** was dissolved in a 0.5 mL CH<sub>2</sub>Cl<sub>2</sub>, and *n*-hexane 2 mL were added. The sample was maintained at 4 °C for several days. Crystals were obtained through diffusion.

The X-ray diffraction data were collected at and 173 K on a Bruker SMART CCD diffractometer with MoK $\alpha$  radiation ( $\lambda = 0.71073 \text{ \AA}$ ). The diffraction data were corrected for absorption using the SADABS program.<sup>12</sup> The structures were solved using SHELXS97<sup>13</sup> and refined by full matrix least squares on F<sup>2</sup> using SHELXL-2014 in the anisotropic approximation for all non-hydrogen atoms. The hydrogen atoms were introduced at calculated positions and not refined (riding model).<sup>14</sup>

---

<sup>12</sup> Bruker. SADABS. Bruker AXS Inc.: Madison, Wisconsin, USA 2001.

<sup>13</sup> M. Sheldrick, *Acta Crystallogr. Sect. A Found. Crystallogr.* 2008, **64**, 112–122

<sup>14</sup> G. M. Sheldrick, *Acta Crystallogr. Sect. C Struct. Chem.* 2015, **71**, 3-8

Crystallography data of **2c**

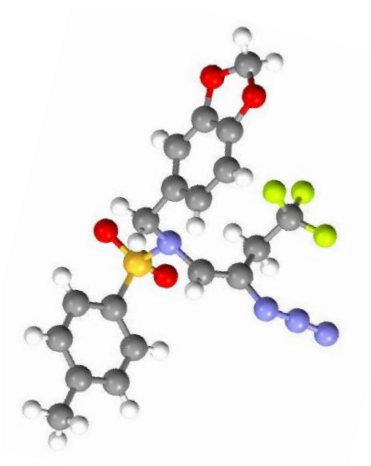

Structure of **2c**: ellipsoid contour probability: 50%

Crystallography data of **2l**

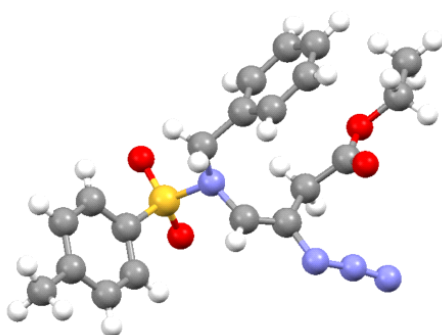

Structure of **2l**: ellipsoid contour probability: 50%

Crystallography data of **4a**

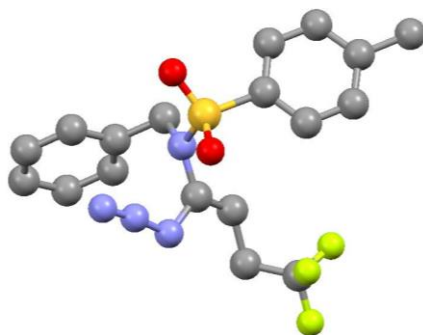

Structure of **4a**: ellipsoid contour probability: 50%

## Crystal Structure Report for **2c** (CCDC **2384608**)

Table 1. Crystal data and structure refinement for **2c** (CCDC **2384608**)

|                                 |                                                                                                                          |
|---------------------------------|--------------------------------------------------------------------------------------------------------------------------|
| Identification code             | 2384608                                                                                                                  |
| Empirical formula               | C <sub>19</sub> H <sub>17</sub> F <sub>3</sub> N <sub>4</sub> O <sub>4</sub> S, solvent                                  |
| Formula weight                  | 454.42                                                                                                                   |
| Temperature                     | 173(2) K                                                                                                                 |
| Wavelength                      | 0.71073 Å                                                                                                                |
| Crystal system, space group     | Monoclinic, P 21/c                                                                                                       |
| Unit cell dimensions            | a = 5.5258(4) Å    alpha = 90 deg.<br>b = 19.0765(13) Å    beta = 94.338(3) deg.<br>c = 21.2903(18) Å    gamma = 90 deg. |
| Volume                          | 2237.8(3) Å <sup>3</sup>                                                                                                 |
| Z, Calculated density           | 4, 1.349 Mg/m <sup>3</sup>                                                                                               |
| Absorption coefficient          | 0.201 mm <sup>-1</sup>                                                                                                   |
| F(000)                          | 936                                                                                                                      |
| Crystal size                    | 0.160 x 0.150 x 0.140 mm                                                                                                 |
| Theta range for data collection | 1.435 to 27.921 deg.                                                                                                     |

Limiting indices       $-7 \leq h \leq 7, -25 \leq k \leq 24, -27 \leq l \leq 28$

Reflections collected / unique    44897 / 5345 [R(int) = 0.0557]

Completeness to theta = 25.242    99.8 %

Absorption correction      Semi-empirical from equivalents

Max. and min. transmission      0.7456 and 0.7138

Refinement method          Full-matrix least-squares on  $F^2$

Data / restraints / parameters    5345 / 0 / 281

Goodness-of-fit on  $F^2$       1.024

Final R indices [ $I > 2\sigma(I)$ ]    R1 = 0.0446, wR2 = 0.1104

R indices (all data)          R1 = 0.0741, wR2 = 0.1245

Extinction coefficient      n/a

Largest diff. peak and hole    0.317 and -0.218 e. $\text{\AA}^{-3}$



Table 2. Atomic coordinates ( $\times 10^4$ ) and equivalent isotropic displacement parameters ( $\text{\AA}^2 \times 10^3$ ) for elmmh\_a\_sq.

U(eq) is defined as one third of the trace of the orthogonalized Uij tensor.

---

|        | x        | y       | z       | U(eq) |
|--------|----------|---------|---------|-------|
| N(1)   | 8271(3)  | 4230(1) | 3532(1) | 28(1) |
| S(1)   | 10064(1) | 3907(1) | 4126(1) | 29(1) |
| O(1)   | 11547(2) | 3392(1) | 3854(1) | 36(1) |
| O(2)   | 11188(2) | 4496(1) | 4446(1) | 40(1) |
| C(1)   | 8130(3)  | 3483(1) | 4621(1) | 29(1) |
| C(2)   | 7528(4)  | 2780(1) | 4515(1) | 36(1) |
| C(3)   | 5866(4)  | 2470(1) | 4878(1) | 43(1) |
| C(4)   | 4751(4)  | 2838(1) | 5336(1) | 40(1) |
| C(5)   | 5382(4)  | 3537(1) | 5430(1) | 43(1) |
| C(6)   | 7060(4)  | 3863(1) | 5081(1) | 35(1) |
| C(7)   | 2891(4)  | 2491(1) | 5720(1) | 59(1) |
| C(8)   | 6872(3)  | 3700(1) | 3190(1) | 31(1) |
| C(9)   | 7638(3)  | 3357(1) | 2703(1) | 33(1) |
| N(2)   | 6030(3)  | 2823(1) | 2445(1) | 46(1) |
| N(3)   | 6908(3)  | 2380(1) | 2099(1) | 42(1) |
| N(4)   | 7470(4)  | 1950(1) | 1782(1) | 57(1) |
| C(10)  | 9965(4)  | 3493(1) | 2406(1) | 40(1) |
| C(11)  | 9605(5)  | 3857(1) | 1783(1) | 50(1) |
| F(004) | 8345(3)  | 3481(1) | 1344(1) | 70(1) |
| F(005) | 8469(3)  | 4469(1) | 1830(1) | 72(1) |
| F(006) | 11730(3) | 3997(1) | 1552(1) | 72(1) |

---

|       |         |         |         |       |
|-------|---------|---------|---------|-------|
| C(12) | 6793(3) | 4856(1) | 3696(1) | 34(1) |
| C(13) | 6163(3) | 5290(1) | 3117(1) | 32(1) |
| C(14) | 3993(4) | 5197(1) | 2763(1) | 40(1) |
| C(15) | 3412(4) | 5568(1) | 2209(1) | 45(1) |
| C(16) | 5080(4) | 6038(1) | 2034(1) | 41(1) |
| O(3)  | 4920(3) | 6482(1) | 1519(1) | 57(1) |
| C(17) | 7226(5) | 6810(1) | 1528(1) | 65(1) |
| O(4)  | 8515(3) | 6683(1) | 2122(1) | 57(1) |
| C(18) | 7227(4) | 6154(1) | 2391(1) | 39(1) |
| C(19) | 7835(3) | 5789(1) | 2934(1) | 37(1) |

---

Table 3. Selected bond lengths [Å] and angles [deg] for elmmh\_a\_sq.

---

---

Symmetry transformations used to generate equivalent atoms:

Table 4. Bond lengths [Å] and angles [deg] for elmmh\_a\_sq.

---

|              |            |
|--------------|------------|
| N(1)-C(8)    | 1.437(2)   |
| N(1)-C(12)   | 1.502(2)   |
| N(1)-S(1)    | 1.6659(16) |
| S(1)-O(2)    | 1.4301(14) |
| S(1)-O(1)    | 1.4301(13) |
| S(1)-C(1)    | 1.7529(18) |
| C(1)-C(6)    | 1.387(3)   |
| C(1)-C(2)    | 1.397(3)   |
| C(2)-C(3)    | 1.376(3)   |
| C(2)-H(2)    | 0.9500     |
| C(3)-C(4)    | 1.385(3)   |
| C(3)-H(3)    | 0.9500     |
| C(4)-C(5)    | 1.387(3)   |
| C(4)-C(7)    | 1.514(3)   |
| C(5)-C(6)    | 1.380(3)   |
| C(5)-H(5)    | 0.9500     |
| C(6)-H(6)    | 0.9500     |
| C(7)-H(7A)   | 0.9800     |
| C(7)-H(7B)   | 0.9800     |
| C(7)-H(7C)   | 0.9800     |
| C(8)-C(9)    | 1.322(3)   |
| C(8)-H(8)    | 0.9500     |
| C(9)-N(2)    | 1.433(3)   |
| C(9)-C(10)   | 1.498(3)   |
| N(2)-N(3)    | 1.243(2)   |
| N(3)-N(4)    | 1.122(2)   |
| C(10)-C(11)  | 1.497(3)   |
| C(10)-H(10A) | 0.9900     |

|                 |            |
|-----------------|------------|
| C(10)-H(10B)    | 0.9900     |
| C(11)-F(004)    | 1.332(3)   |
| C(11)-F(005)    | 1.333(3)   |
| C(11)-F(006)    | 1.334(3)   |
| C(12)-C(13)     | 1.505(3)   |
| C(12)-H(12A)    | 0.9900     |
| C(12)-H(12B)    | 0.9900     |
| C(13)-C(14)     | 1.378(3)   |
| C(13)-C(19)     | 1.402(3)   |
| C(14)-C(15)     | 1.394(3)   |
| C(14)-H(14)     | 0.9500     |
| C(15)-C(16)     | 1.358(3)   |
| C(15)-H(15)     | 0.9500     |
| C(16)-C(18)     | 1.378(3)   |
| C(16)-O(3)      | 1.382(2)   |
| O(3)-C(17)      | 1.418(3)   |
| C(17)-O(4)      | 1.426(3)   |
| C(17)-H(17A)    | 0.9900     |
| C(17)-H(17B)    | 0.9900     |
| O(4)-C(18)      | 1.383(2)   |
| C(18)-C(19)     | 1.368(3)   |
| C(19)-H(19)     | 0.9500     |
|                 |            |
| C(8)-N(1)-C(12) | 113.34(14) |
| C(8)-N(1)-S(1)  | 112.97(12) |
| C(12)-N(1)-S(1) | 114.80(13) |
| O(2)-S(1)-O(1)  | 119.36(8)  |
| O(2)-S(1)-N(1)  | 106.45(8)  |
| O(1)-S(1)-N(1)  | 105.78(8)  |
| O(2)-S(1)-C(1)  | 109.84(9)  |
| O(1)-S(1)-C(1)  | 108.70(8)  |

|                  |            |
|------------------|------------|
| N(1)-S(1)-C(1)   | 105.80(8)  |
| C(6)-C(1)-C(2)   | 120.43(18) |
| C(6)-C(1)-S(1)   | 119.67(14) |
| C(2)-C(1)-S(1)   | 119.70(15) |
| C(3)-C(2)-C(1)   | 118.88(19) |
| C(3)-C(2)-H(2)   | 120.6      |
| C(1)-C(2)-H(2)   | 120.6      |
| C(2)-C(3)-C(4)   | 121.94(19) |
| C(2)-C(3)-H(3)   | 119.0      |
| C(4)-C(3)-H(3)   | 119.0      |
| C(3)-C(4)-C(5)   | 117.90(18) |
| C(3)-C(4)-C(7)   | 121.0(2)   |
| C(5)-C(4)-C(7)   | 121.1(2)   |
| C(6)-C(5)-C(4)   | 121.84(19) |
| C(6)-C(5)-H(5)   | 119.1      |
| C(4)-C(5)-H(5)   | 119.1      |
| C(5)-C(6)-C(1)   | 119.00(18) |
| C(5)-C(6)-H(6)   | 120.5      |
| C(1)-C(6)-H(6)   | 120.5      |
| C(4)-C(7)-H(7A)  | 109.5      |
| C(4)-C(7)-H(7B)  | 109.5      |
| H(7A)-C(7)-H(7B) | 109.5      |
| C(4)-C(7)-H(7C)  | 109.5      |
| H(7A)-C(7)-H(7C) | 109.5      |
| H(7B)-C(7)-H(7C) | 109.5      |
| C(9)-C(8)-N(1)   | 123.60(17) |
| C(9)-C(8)-H(8)   | 118.2      |
| N(1)-C(8)-H(8)   | 118.2      |
| C(8)-C(9)-N(2)   | 115.24(17) |
| C(8)-C(9)-C(10)  | 125.56(18) |
| N(2)-C(9)-C(10)  | 119.19(17) |

|                     |            |
|---------------------|------------|
| N(3)-N(2)-C(9)      | 116.82(17) |
| N(4)-N(3)-N(2)      | 172.8(2)   |
| C(11)-C(10)-C(9)    | 113.21(18) |
| C(11)-C(10)-H(10A)  | 108.9      |
| C(9)-C(10)-H(10A)   | 108.9      |
| C(11)-C(10)-H(10B)  | 108.9      |
| C(9)-C(10)-H(10B)   | 108.9      |
| H(10A)-C(10)-H(10B) | 107.7      |
| F(004)-C(11)-F(005) | 107.5(2)   |
| F(004)-C(11)-F(006) | 106.06(18) |
| F(005)-C(11)-F(006) | 106.60(19) |
| F(004)-C(11)-C(10)  | 113.46(19) |
| F(005)-C(11)-C(10)  | 111.83(19) |
| F(006)-C(11)-C(10)  | 111.0(2)   |
| N(1)-C(12)-C(13)    | 110.04(15) |
| N(1)-C(12)-H(12A)   | 109.7      |
| C(13)-C(12)-H(12A)  | 109.7      |
| N(1)-C(12)-H(12B)   | 109.7      |
| C(13)-C(12)-H(12B)  | 109.7      |
| H(12A)-C(12)-H(12B) | 108.2      |
| C(14)-C(13)-C(19)   | 120.04(19) |
| C(14)-C(13)-C(12)   | 120.93(17) |
| C(19)-C(13)-C(12)   | 119.02(18) |
| C(13)-C(14)-C(15)   | 122.16(19) |
| C(13)-C(14)-H(14)   | 118.9      |
| C(15)-C(14)-H(14)   | 118.9      |
| C(16)-C(15)-C(14)   | 116.7(2)   |
| C(16)-C(15)-H(15)   | 121.6      |
| C(14)-C(15)-H(15)   | 121.6      |
| C(15)-C(16)-C(18)   | 121.9(2)   |
| C(15)-C(16)-O(3)    | 128.2(2)   |

|                     |            |
|---------------------|------------|
| C(18)-C(16)-O(3)    | 109.84(18) |
| C(16)-O(3)-C(17)    | 104.89(18) |
| O(3)-C(17)-O(4)     | 108.93(19) |
| O(3)-C(17)-H(17A)   | 109.9      |
| O(4)-C(17)-H(17A)   | 109.9      |
| O(3)-C(17)-H(17B)   | 109.9      |
| O(4)-C(17)-H(17B)   | 109.9      |
| H(17A)-C(17)-H(17B) | 108.3      |
| C(18)-O(4)-C(17)    | 104.65(17) |
| C(19)-C(18)-C(16)   | 122.01(19) |
| C(19)-C(18)-O(4)    | 128.25(19) |
| C(16)-C(18)-O(4)    | 109.73(18) |
| C(18)-C(19)-C(13)   | 117.07(19) |
| C(18)-C(19)-H(19)   | 121.5      |
| C(13)-C(19)-H(19)   | 121.5      |

---

Symmetry transformations used to generate equivalent atoms:



Table 5. Anisotropic displacement parameters ( $\text{\AA}^2 \times 10^3$ ) for elmmh\_a\_sq.

The anisotropic displacement factor exponent takes the form:

$$-2 \pi^2 [ h^2 a^{*2} U_{11} + \dots + 2 h k a^* b^* U_{12} ]$$

---

|        | U11   | U22   | U33   | U23    | U13    | U12    |
|--------|-------|-------|-------|--------|--------|--------|
| N(1)   | 30(1) | 24(1) | 32(1) | 0(1)   | 9(1)   | 2(1)   |
| S(1)   | 26(1) | 25(1) | 36(1) | -3(1)  | 5(1)   | 0(1)   |
| O(1)   | 29(1) | 35(1) | 46(1) | -5(1)  | 8(1)   | 7(1)   |
| O(2)   | 35(1) | 35(1) | 50(1) | -9(1)  | 3(1)   | -7(1)  |
| C(1)   | 31(1) | 27(1) | 29(1) | 0(1)   | 1(1)   | -1(1)  |
| C(2)   | 44(1) | 28(1) | 37(1) | -3(1)  | 2(1)   | -3(1)  |
| C(3)   | 51(1) | 34(1) | 42(1) | 4(1)   | -3(1)  | -12(1) |
| C(4)   | 38(1) | 49(1) | 34(1) | 13(1)  | 1(1)   | -3(1)  |
| C(5)   | 49(1) | 47(1) | 33(1) | 4(1)   | 12(1)  | 7(1)   |
| C(6)   | 44(1) | 29(1) | 33(1) | -1(1)  | 5(1)   | 2(1)   |
| C(7)   | 51(1) | 76(2) | 51(2) | 21(1)  | 6(1)   | -15(1) |
| C(8)   | 26(1) | 31(1) | 38(1) | 2(1)   | 4(1)   | 2(1)   |
| C(9)   | 29(1) | 34(1) | 37(1) | -4(1)  | 2(1)   | 1(1)   |
| N(2)   | 39(1) | 47(1) | 52(1) | -15(1) | 4(1)   | -6(1)  |
| N(3)   | 44(1) | 37(1) | 43(1) | -6(1)  | -7(1)  | 0(1)   |
| N(4)   | 67(1) | 46(1) | 55(1) | -15(1) | -10(1) | 6(1)   |
| C(10)  | 34(1) | 42(1) | 43(1) | -10(1) | 8(1)   | -2(1)  |
| C(11)  | 57(1) | 44(1) | 51(1) | -10(1) | 20(1)  | -6(1)  |
| F(004) | 89(1) | 76(1) | 43(1) | -5(1)  | 1(1)   | -20(1) |
| F(005) | 96(1) | 52(1) | 71(1) | 9(1)   | 31(1)  | 13(1)  |
| F(006) | 79(1) | 77(1) | 65(1) | -13(1) | 41(1)  | -18(1) |
| C(12)  | 34(1) | 27(1) | 42(1) | 0(1)   | 15(1)  | 6(1)   |

---

|       |       |       |       |       |       |        |
|-------|-------|-------|-------|-------|-------|--------|
| C(13) | 30(1) | 24(1) | 44(1) | 2(1)  | 10(1) | 5(1)   |
| C(14) | 34(1) | 31(1) | 56(1) | 6(1)  | 8(1)  | -3(1)  |
| C(15) | 36(1) | 37(1) | 62(2) | 4(1)  | -6(1) | 0(1)   |
| C(16) | 46(1) | 29(1) | 47(1) | 8(1)  | 2(1)  | 3(1)   |
| O(3)  | 61(1) | 46(1) | 61(1) | 22(1) | -8(1) | -3(1)  |
| C(17) | 72(2) | 55(2) | 66(2) | 26(1) | 1(1)  | -14(1) |
| O(4)  | 50(1) | 47(1) | 72(1) | 29(1) | 0(1)  | -12(1) |
| C(18) | 36(1) | 29(1) | 54(1) | 9(1)  | 8(1)  | 0(1)   |
| C(19) | 29(1) | 31(1) | 52(1) | 6(1)  | 4(1)  | 2(1)   |

---

Table 6. Hydrogen coordinates ( $\times 10^4$ ) and isotropic displacement parameters ( $\text{Å}^2 \times 10^3$ ) for elmmh\_a\_sq.

---

|        | x     | y    | z    | U(eq) |
|--------|-------|------|------|-------|
| H(2)   | 8254  | 2519 | 4199 | 43    |
| H(3)   | 5473  | 1990 | 4811 | 51    |
| H(5)   | 4639  | 3797 | 5743 | 51    |
| H(6)   | 7476  | 4341 | 5155 | 42    |
| H(7A)  | 3553  | 2050 | 5896 | 89    |
| H(7B)  | 1415  | 2394 | 5449 | 89    |
| H(7C)  | 2501  | 2803 | 6064 | 89    |
| H(8)   | 5312  | 3589 | 3322 | 38    |
| H(10A) | 11034 | 3783 | 2695 | 48    |
| H(10B) | 10797 | 3040 | 2347 | 48    |
| H(12A) | 7727  | 5143 | 4016 | 41    |
| H(12B) | 5286  | 4698 | 3876 | 41    |
| H(14)  | 2856  | 4869 | 2903 | 48    |
| H(15)  | 1921  | 5495 | 1964 | 55    |
| H(17A) | 7023  | 7321 | 1460 | 77    |
| H(17B) | 8149  | 6619 | 1186 | 77    |
| H(19)  | 9325  | 5870 | 3175 | 45    |

---

Table 7. Selected torsion angles [deg] for elmmh\_a\_sq.

---

---

Symmetry transformations used to generate equivalent atoms:

Table 8. Torsion angles [deg] for elmmh\_a\_sq.

---

|                      |             |
|----------------------|-------------|
| C(8)-N(1)-S(1)-O(2)  | -175.82(12) |
| C(12)-N(1)-S(1)-O(2) | -43.76(14)  |
| C(8)-N(1)-S(1)-O(1)  | 56.24(13)   |
| C(12)-N(1)-S(1)-O(1) | -171.69(12) |
| C(8)-N(1)-S(1)-C(1)  | -58.98(14)  |
| C(12)-N(1)-S(1)-C(1) | 73.08(14)   |
| O(2)-S(1)-C(1)-C(6)  | 28.05(18)   |
| O(1)-S(1)-C(1)-C(6)  | 160.31(15)  |
| N(1)-S(1)-C(1)-C(6)  | -86.47(16)  |
| O(2)-S(1)-C(1)-C(2)  | -156.99(15) |
| O(1)-S(1)-C(1)-C(2)  | -24.73(18)  |
| N(1)-S(1)-C(1)-C(2)  | 88.49(16)   |
| C(6)-C(1)-C(2)-C(3)  | -0.3(3)     |
| S(1)-C(1)-C(2)-C(3)  | -175.17(16) |
| C(1)-C(2)-C(3)-C(4)  | 0.9(3)      |
| C(2)-C(3)-C(4)-C(5)  | -0.9(3)     |
| C(2)-C(3)-C(4)-C(7)  | 178.8(2)    |
| C(3)-C(4)-C(5)-C(6)  | 0.2(3)      |
| C(7)-C(4)-C(5)-C(6)  | -179.5(2)   |
| C(4)-C(5)-C(6)-C(1)  | 0.5(3)      |
| C(2)-C(1)-C(6)-C(5)  | -0.4(3)     |
| S(1)-C(1)-C(6)-C(5)  | 174.49(16)  |
| C(12)-N(1)-C(8)-C(9) | 137.99(19)  |
| S(1)-N(1)-C(8)-C(9)  | -89.2(2)    |
| N(1)-C(8)-C(9)-N(2)  | 177.10(17)  |
| N(1)-C(8)-C(9)-C(10) | -4.2(3)     |
| C(8)-C(9)-N(2)-N(3)  | -162.64(19) |
| C(10)-C(9)-N(2)-N(3) | 18.6(3)     |

|                         |             |
|-------------------------|-------------|
| C(8)-C(9)-C(10)-C(11)   | -106.0(2)   |
| N(2)-C(9)-C(10)-C(11)   | 72.6(2)     |
| C(9)-C(10)-C(11)-F(004) | -63.7(2)    |
| C(9)-C(10)-C(11)-F(005) | 58.1(2)     |
| C(9)-C(10)-C(11)-F(006) | 176.99(17)  |
| C(8)-N(1)-C(12)-C(13)   | -73.51(19)  |
| S(1)-N(1)-C(12)-C(13)   | 154.61(13)  |
| N(1)-C(12)-C(13)-C(14)  | 94.3(2)     |
| N(1)-C(12)-C(13)-C(19)  | -84.9(2)    |
| C(19)-C(13)-C(14)-C(15) | 2.3(3)      |
| C(12)-C(13)-C(14)-C(15) | -176.88(18) |
| C(13)-C(14)-C(15)-C(16) | -0.9(3)     |
| C(14)-C(15)-C(16)-C(18) | -1.1(3)     |
| C(14)-C(15)-C(16)-O(3)  | -178.0(2)   |
| C(15)-C(16)-O(3)-C(17)  | -174.8(2)   |
| C(18)-C(16)-O(3)-C(17)  | 8.0(3)      |
| C(16)-O(3)-C(17)-O(4)   | -13.6(3)    |
| O(3)-C(17)-O(4)-C(18)   | 13.9(3)     |
| C(15)-C(16)-C(18)-C(19) | 1.9(3)      |
| O(3)-C(16)-C(18)-C(19)  | 179.27(19)  |
| C(15)-C(16)-C(18)-O(4)  | -176.79(19) |
| O(3)-C(16)-C(18)-O(4)   | 0.6(3)      |
| C(17)-O(4)-C(18)-C(19)  | 172.6(2)    |
| C(17)-O(4)-C(18)-C(16)  | -8.9(2)     |
| C(16)-C(18)-C(19)-C(13) | -0.5(3)     |
| O(4)-C(18)-C(19)-C(13)  | 177.9(2)    |
| C(14)-C(13)-C(19)-C(18) | -1.5(3)     |
| C(12)-C(13)-C(19)-C(18) | 177.66(17)  |

---

Symmetry transformations used to generate equivalent atoms:



Table 9. Hydrogen bonds for elmmh\_a\_sq [A and deg.].

---

| D-H...A | d(D-H) | d(H...A) | d(D...A) | <(DHA) |
|---------|--------|----------|----------|--------|
|---------|--------|----------|----------|--------|

### Crystal Structure Report for **2l** (CCDC **2384809**)

Table 1. Crystal data and structure refinement for **2l** (CCDC **2384809**)

|                     |         |
|---------------------|---------|
| Identification code | 2384809 |
|---------------------|---------|

|                   |                                                                 |
|-------------------|-----------------------------------------------------------------|
| Empirical formula | C <sub>20</sub> H <sub>22</sub> N <sub>4</sub> O <sub>4</sub> S |
|-------------------|-----------------------------------------------------------------|

|                |        |
|----------------|--------|
| Formula weight | 414.47 |
|----------------|--------|

|             |          |
|-------------|----------|
| Temperature | 120(2) K |
|-------------|----------|

|            |           |
|------------|-----------|
| Wavelength | 0.71073 Å |
|------------|-----------|

|                             |                |
|-----------------------------|----------------|
| Crystal system, space group | Triclinic, P 1 |
|-----------------------------|----------------|

|                      |                                           |
|----------------------|-------------------------------------------|
| Unit cell dimensions | a = 5.9999(8) Å    alpha = 86.813(5) deg. |
|----------------------|-------------------------------------------|

|  |                                           |
|--|-------------------------------------------|
|  | b = 8.0325(11) Å    beta = 82.243(5) deg. |
|--|-------------------------------------------|

|  |                                             |
|--|---------------------------------------------|
|  | c = 10.7268(15) Å    gamma = 86.551(5) deg. |
|--|---------------------------------------------|

|        |                           |
|--------|---------------------------|
| Volume | 510.72(12) Å <sup>3</sup> |
|--------|---------------------------|

|                       |                            |
|-----------------------|----------------------------|
| Z, Calculated density | 1, 1.348 Mg/m <sup>3</sup> |
|-----------------------|----------------------------|

|                        |                        |
|------------------------|------------------------|
| Absorption coefficient | 0.193 mm <sup>-1</sup> |
|------------------------|------------------------|

|        |     |
|--------|-----|
| F(000) | 218 |
|--------|-----|



Crystal size 0.200 x 0.160 x 0.100 mm

Theta range for data collection 1.918 to 27.958 deg.

Limiting indices  $-7 \leq h \leq 7$ ,  $-10 \leq k \leq 10$ ,  $-14 \leq l \leq 14$

Reflections collected / unique 18622 / 4435 [R(int) = 0.0373]

Completeness to theta = 25.242 99.7 %

Absorption correction Semi-empirical from equivalents

Max. and min. transmission 0.7456 and 0.6954

Refinement method Full-matrix least-squares on  $F^2$

Data / restraints / parameters 4435 / 3 / 264

Goodness-of-fit on  $F^2$  1.051

Final R indices [ $I > 2\sigma(I)$ ] R1 = 0.0329, wR2 = 0.0750

R indices (all data) R1 = 0.0360, wR2 = 0.0777

Absolute structure parameter 0.02(2)

Extinction coefficient n/a

Largest diff. peak and hole 0.310 and -0.184 e. $\text{\AA}^{-3}$

Table 2. Atomic coordinates ( $\times 10^4$ ) and equivalent isotropic displacement parameters ( $\text{Å}^2 \times 10^3$ ) for elmds\_a.

U(eq) is defined as one third of the trace of the orthogonalized Uij tensor.

---

|       | x       | y        | z       | U(eq) |
|-------|---------|----------|---------|-------|
| S(1)  | 7087(1) | 5310(1)  | 2877(1) | 20(1) |
| O(1)  | 6866(3) | 3918(2)  | 2129(2) | 28(1) |
| O(2)  | 9275(3) | 5788(3)  | 3062(2) | 33(1) |
| C(1)  | 5660(4) | 7083(3)  | 2260(2) | 19(1) |
| C(2)  | 3746(4) | 6891(3)  | 1695(2) | 21(1) |
| C(3)  | 2533(5) | 8297(4)  | 1289(3) | 26(1) |
| C(4)  | 3192(5) | 9898(3)  | 1443(2) | 26(1) |
| C(5)  | 5131(5) | 10066(3) | 2000(2) | 26(1) |
| C(6)  | 6371(4) | 8676(3)  | 2412(2) | 22(1) |
| C(7)  | 1824(6) | 11410(4) | 1027(3) | 40(1) |
| N(1)  | 5737(4) | 4861(3)  | 4296(2) | 20(1) |
| C(8)  | 3629(4) | 4086(3)  | 4311(2) | 23(1) |
| C(9)  | 3422(4) | 2489(3)  | 4692(2) | 23(1) |
| C(10) | 5244(5) | 1376(3)  | 5191(2) | 24(1) |
| C(11) | 4700(5) | 890(3)   | 6582(2) | 24(1) |
| O(3)  | 2930(3) | 1245(3)  | 7226(2) | 35(1) |
| O(4)  | 6424(3) | 16(2)    | 7000(2) | 29(1) |
| C(12) | 6115(6) | -490(4)  | 8332(3) | 32(1) |
| C(13) | 8257(6) | -1418(5) | 8625(3) | 41(1) |
| N(2)  | 1287(4) | 1829(3)  | 4622(2) | 30(1) |
| N(3)  | 1124(4) | 302(3)   | 4853(3) | 33(1) |

---

|       |         |          |         |       |
|-------|---------|----------|---------|-------|
| N(4)  | 711(5)  | -1056(4) | 5022(3) | 48(1) |
| C(14) | 5708(5) | 6174(3)  | 5225(2) | 28(1) |
| C(15) | 5832(5) | 5395(3)  | 6531(2) | 24(1) |
| C(16) | 4021(5) | 5576(4)  | 7482(3) | 31(1) |
| C(17) | 4203(6) | 4911(4)  | 8685(3) | 38(1) |
| C(18) | 6168(6) | 4064(4)  | 8957(3) | 38(1) |
| C(19) | 7957(6) | 3848(4)  | 8008(3) | 33(1) |
| C(20) | 7801(5) | 4516(4)  | 6799(3) | 28(1) |

---

Table 3. Selected bond lengths [Å] and angles [deg] for elmds\_a.

---

---

Symmetry transformations used to generate equivalent atoms:

Table 4. Bond lengths [Å] and angles [deg] for elmds\_a.

---

|              |          |
|--------------|----------|
| S(1)-O(2)    | 1.432(2) |
| S(1)-O(1)    | 1.435(2) |
| S(1)-N(1)    | 1.656(2) |
| S(1)-C(1)    | 1.762(2) |
| C(1)-C(2)    | 1.389(4) |
| C(1)-C(6)    | 1.398(4) |
| C(2)-C(3)    | 1.389(4) |
| C(2)-H(2)    | 0.9500   |
| C(3)-C(4)    | 1.393(4) |
| C(3)-H(3)    | 0.9500   |
| C(4)-C(5)    | 1.394(4) |
| C(4)-C(7)    | 1.506(4) |
| C(5)-C(6)    | 1.389(4) |
| C(5)-H(5)    | 0.9500   |
| C(6)-H(6)    | 0.9500   |
| C(7)-H(7A)   | 0.9800   |
| C(7)-H(7B)   | 0.9800   |
| C(7)-H(7C)   | 0.9800   |
| N(1)-C(8)    | 1.441(4) |
| N(1)-C(14)   | 1.488(3) |
| C(8)-C(9)    | 1.333(4) |
| C(8)-H(8)    | 0.9500   |
| C(9)-N(2)    | 1.428(4) |
| C(9)-C(10)   | 1.506(4) |
| C(10)-C(11)  | 1.518(4) |
| C(10)-H(10A) | 0.9900   |
| C(10)-H(10B) | 0.9900   |
| C(11)-O(3)   | 1.214(3) |

|                |            |
|----------------|------------|
| C(11)-O(4)     | 1.330(3)   |
| O(4)-C(12)     | 1.454(3)   |
| C(12)-C(13)    | 1.507(4)   |
| C(12)-H(12A)   | 0.9900     |
| C(12)-H(12B)   | 0.9900     |
| C(13)-H(13A)   | 0.9800     |
| C(13)-H(13B)   | 0.9800     |
| C(13)-H(13C)   | 0.9800     |
| N(2)-N(3)      | 1.245(4)   |
| N(3)-N(4)      | 1.132(4)   |
| C(14)-C(15)    | 1.512(4)   |
| C(14)-H(14A)   | 0.9900     |
| C(14)-H(14B)   | 0.9900     |
| C(15)-C(16)    | 1.393(4)   |
| C(15)-C(20)    | 1.395(4)   |
| C(16)-C(17)    | 1.384(4)   |
| C(16)-H(16)    | 0.9500     |
| C(17)-C(18)    | 1.383(5)   |
| C(17)-H(17)    | 0.9500     |
| C(18)-C(19)    | 1.387(5)   |
| C(18)-H(18)    | 0.9500     |
| C(19)-C(20)    | 1.388(4)   |
| C(19)-H(19)    | 0.9500     |
| C(20)-H(20)    | 0.9500     |
| O(2)-S(1)-O(1) | 120.11(13) |
| O(2)-S(1)-N(1) | 106.44(12) |
| O(1)-S(1)-N(1) | 106.42(11) |
| O(2)-S(1)-C(1) | 107.40(12) |
| O(1)-S(1)-C(1) | 108.89(12) |
| N(1)-S(1)-C(1) | 106.88(11) |

|                  |            |
|------------------|------------|
| C(2)-C(1)-C(6)   | 120.5(2)   |
| C(2)-C(1)-S(1)   | 119.5(2)   |
| C(6)-C(1)-S(1)   | 119.9(2)   |
| C(3)-C(2)-C(1)   | 119.4(3)   |
| C(3)-C(2)-H(2)   | 120.3      |
| C(1)-C(2)-H(2)   | 120.3      |
| C(2)-C(3)-C(4)   | 121.2(3)   |
| C(2)-C(3)-H(3)   | 119.4      |
| C(4)-C(3)-H(3)   | 119.4      |
| C(3)-C(4)-C(5)   | 118.5(2)   |
| C(3)-C(4)-C(7)   | 120.5(3)   |
| C(5)-C(4)-C(7)   | 120.9(3)   |
| C(6)-C(5)-C(4)   | 121.2(3)   |
| C(6)-C(5)-H(5)   | 119.4      |
| C(4)-C(5)-H(5)   | 119.4      |
| C(5)-C(6)-C(1)   | 119.2(2)   |
| C(5)-C(6)-H(6)   | 120.4      |
| C(1)-C(6)-H(6)   | 120.4      |
| C(4)-C(7)-H(7A)  | 109.5      |
| C(4)-C(7)-H(7B)  | 109.5      |
| H(7A)-C(7)-H(7B) | 109.5      |
| C(4)-C(7)-H(7C)  | 109.5      |
| H(7A)-C(7)-H(7C) | 109.5      |
| H(7B)-C(7)-H(7C) | 109.5      |
| C(8)-N(1)-C(14)  | 114.8(2)   |
| C(8)-N(1)-S(1)   | 115.23(16) |
| C(14)-N(1)-S(1)  | 115.38(18) |
| C(9)-C(8)-N(1)   | 120.7(2)   |
| C(9)-C(8)-H(8)   | 119.7      |
| N(1)-C(8)-H(8)   | 119.7      |
| C(8)-C(9)-N(2)   | 116.0(2)   |

|                     |          |
|---------------------|----------|
| C(8)-C(9)-C(10)     | 124.8(3) |
| N(2)-C(9)-C(10)     | 119.2(2) |
| C(9)-C(10)-C(11)    | 113.0(2) |
| C(9)-C(10)-H(10A)   | 109.0    |
| C(11)-C(10)-H(10A)  | 109.0    |
| C(9)-C(10)-H(10B)   | 109.0    |
| C(11)-C(10)-H(10B)  | 109.0    |
| H(10A)-C(10)-H(10B) | 107.8    |
| O(3)-C(11)-O(4)     | 124.5(2) |
| O(3)-C(11)-C(10)    | 124.8(2) |
| O(4)-C(11)-C(10)    | 110.8(2) |
| C(11)-O(4)-C(12)    | 115.8(2) |
| O(4)-C(12)-C(13)    | 107.6(2) |
| O(4)-C(12)-H(12A)   | 110.2    |
| C(13)-C(12)-H(12A)  | 110.2    |
| O(4)-C(12)-H(12B)   | 110.2    |
| C(13)-C(12)-H(12B)  | 110.2    |
| H(12A)-C(12)-H(12B) | 108.5    |
| C(12)-C(13)-H(13A)  | 109.5    |
| C(12)-C(13)-H(13B)  | 109.5    |
| H(13A)-C(13)-H(13B) | 109.5    |
| C(12)-C(13)-H(13C)  | 109.5    |
| H(13A)-C(13)-H(13C) | 109.5    |
| H(13B)-C(13)-H(13C) | 109.5    |
| N(3)-N(2)-C(9)      | 117.1(2) |
| N(4)-N(3)-N(2)      | 171.3(3) |
| N(1)-C(14)-C(15)    | 110.7(2) |
| N(1)-C(14)-H(14A)   | 109.5    |
| C(15)-C(14)-H(14A)  | 109.5    |
| N(1)-C(14)-H(14B)   | 109.5    |
| C(15)-C(14)-H(14B)  | 109.5    |



|                     |          |
|---------------------|----------|
| H(14A)-C(14)-H(14B) | 108.1    |
| C(16)-C(15)-C(20)   | 119.4(2) |
| C(16)-C(15)-C(14)   | 120.9(3) |
| C(20)-C(15)-C(14)   | 119.7(3) |
| C(17)-C(16)-C(15)   | 120.0(3) |
| C(17)-C(16)-H(16)   | 120.0    |
| C(15)-C(16)-H(16)   | 120.0    |
| C(18)-C(17)-C(16)   | 120.7(3) |
| C(18)-C(17)-H(17)   | 119.6    |
| C(16)-C(17)-H(17)   | 119.6    |
| C(17)-C(18)-C(19)   | 119.6(3) |
| C(17)-C(18)-H(18)   | 120.2    |
| C(19)-C(18)-H(18)   | 120.2    |
| C(20)-C(19)-C(18)   | 120.2(3) |
| C(20)-C(19)-H(19)   | 119.9    |
| C(18)-C(19)-H(19)   | 119.9    |
| C(19)-C(20)-C(15)   | 120.1(3) |
| C(19)-C(20)-H(20)   | 119.9    |
| C(15)-C(20)-H(20)   | 119.9    |

---

Symmetry transformations used to generate equivalent atoms:

Table 5. Anisotropic displacement parameters ( $\text{\AA}^2 \times 10^3$ ) for elmds\_a.

The anisotropic displacement factor exponent takes the form:

$$-2 \pi^2 [ h^2 a^{*2} U_{11} + \dots + 2 h k a^* b^* U_{12} ]$$

---

|       | U11   | U22   | U33   | U23   | U13    | U12   |
|-------|-------|-------|-------|-------|--------|-------|
| S(1)  | 18(1) | 20(1) | 22(1) | 4(1)  | -1(1)  | 1(1)  |
| O(1)  | 35(1) | 21(1) | 24(1) | -2(1) | 3(1)   | 6(1)  |
| O(2)  | 19(1) | 33(1) | 45(1) | 14(1) | -7(1)  | -4(1) |
| C(1)  | 20(1) | 19(1) | 16(1) | 2(1)  | 0(1)   | 0(1)  |
| C(2)  | 22(1) | 20(1) | 20(1) | 2(1)  | -2(1)  | -4(1) |
| C(3)  | 21(1) | 31(2) | 24(1) | 5(1)  | -4(1)  | 0(1)  |
| C(4)  | 25(1) | 24(1) | 24(1) | 5(1)  | 5(1)   | 5(1)  |
| C(5)  | 34(2) | 17(1) | 24(1) | 0(1)  | 3(1)   | -2(1) |
| C(6)  | 23(1) | 22(1) | 20(1) | -2(1) | -1(1)  | -5(1) |
| C(7)  | 38(2) | 30(2) | 46(2) | 13(1) | 3(1)   | 13(1) |
| N(1)  | 23(1) | 20(1) | 16(1) | 2(1)  | -3(1)  | -3(1) |
| C(8)  | 17(1) | 27(1) | 23(1) | 5(1)  | -3(1)  | 1(1)  |
| C(9)  | 17(1) | 27(1) | 26(1) | 1(1)  | -1(1)  | -2(1) |
| C(10) | 23(1) | 23(1) | 26(1) | 0(1)  | -2(1)  | 0(1)  |
| C(11) | 26(1) | 21(1) | 25(1) | 1(1)  | -4(1)  | -2(1) |
| O(3)  | 29(1) | 45(1) | 29(1) | 2(1)  | 4(1)   | 5(1)  |
| O(4)  | 31(1) | 28(1) | 26(1) | 4(1)  | -6(1)  | 4(1)  |
| C(12) | 40(2) | 32(2) | 24(1) | 2(1)  | -5(1)  | -2(1) |
| C(13) | 44(2) | 43(2) | 36(2) | 9(1)  | -16(1) | 2(2)  |
| N(2)  | 23(1) | 29(1) | 39(1) | 2(1)  | -6(1)  | -3(1) |
| N(3)  | 21(1) | 32(1) | 47(2) | -3(1) | -4(1)  | -4(1) |
| N(4)  | 31(2) | 29(2) | 84(2) | -6(1) | -2(1)  | -9(1) |

---

|       |       |       |       |       |        |        |
|-------|-------|-------|-------|-------|--------|--------|
| C(14) | 41(2) | 20(1) | 24(1) | 0(1)  | -8(1)  | -2(1)  |
| C(15) | 33(2) | 20(1) | 20(1) | -2(1) | -6(1)  | -3(1)  |
| C(16) | 32(2) | 31(2) | 29(1) | -7(1) | -3(1)  | 2(1)   |
| C(17) | 48(2) | 41(2) | 24(1) | -5(1) | 4(1)   | -8(2)  |
| C(18) | 60(2) | 36(2) | 19(1) | 2(1)  | -10(1) | -11(2) |
| C(19) | 40(2) | 31(2) | 32(2) | 2(1)  | -15(1) | -4(1)  |
| C(20) | 30(2) | 28(1) | 25(1) | 0(1)  | -4(1)  | -2(1)  |

---

Table 6. Hydrogen coordinates ( $\times 10^4$ ) and isotropic displacement parameters ( $\text{\AA}^2 \times 10^3$ ) for elmds\_a.

---

|        | x    | y     | z    | U(eq) |
|--------|------|-------|------|-------|
| H(2)   | 3272 | 5807  | 1587 | 25    |
| H(3)   | 1229 | 8165  | 898  | 31    |
| H(5)   | 5612 | 11151 | 2100 | 31    |
| H(6)   | 7687 | 8807  | 2792 | 26    |
| H(7A)  | 2192 | 12386 | 1452 | 60    |
| H(7B)  | 216  | 11220 | 1244 | 60    |
| H(7C)  | 2171 | 11607 | 113  | 60    |
| H(8)   | 2373 | 4720  | 4046 | 27    |
| H(10A) | 6671 | 1959  | 5055 | 29    |
| H(10B) | 5476 | 350   | 4709 | 29    |
| H(12A) | 4830 | -1221 | 8525 | 38    |
| H(12B) | 5800 | 503   | 8847 | 38    |
| H(13A) | 8548 | -2400 | 8113 | 61    |
| H(13B) | 8100 | -1773 | 9520 | 61    |
| H(13C) | 9516 | -682  | 8432 | 61    |
| H(14A) | 4308 | 6893  | 5227 | 34    |
| H(14B) | 7003 | 6883  | 4977 | 34    |
| H(16)  | 2663 | 6154  | 7306 | 37    |
| H(17)  | 2964 | 5039  | 9331 | 46    |
| H(18)  | 6291 | 3633  | 9790 | 45    |
| H(19)  | 9295 | 3240  | 8185 | 40    |
| H(20)  | 9037 | 4374  | 6153 | 33    |

---



Table 7. Selected torsion angles [deg] for elmds\_a.

---

---

Symmetry transformations used to generate equivalent atoms:

Table 8. Torsion angles [deg] for elmds\_a.

---

|                       |             |
|-----------------------|-------------|
| O(2)-S(1)-C(1)-C(2)   | 163.7(2)    |
| O(1)-S(1)-C(1)-C(2)   | 32.2(2)     |
| N(1)-S(1)-C(1)-C(2)   | -82.4(2)    |
| O(2)-S(1)-C(1)-C(6)   | -20.3(2)    |
| O(1)-S(1)-C(1)-C(6)   | -151.82(19) |
| N(1)-S(1)-C(1)-C(6)   | 93.6(2)     |
| C(6)-C(1)-C(2)-C(3)   | -0.5(4)     |
| S(1)-C(1)-C(2)-C(3)   | 175.5(2)    |
| C(1)-C(2)-C(3)-C(4)   | -0.3(4)     |
| C(2)-C(3)-C(4)-C(5)   | 1.0(4)      |
| C(2)-C(3)-C(4)-C(7)   | -178.4(3)   |
| C(3)-C(4)-C(5)-C(6)   | -0.9(4)     |
| C(7)-C(4)-C(5)-C(6)   | 178.5(3)    |
| C(4)-C(5)-C(6)-C(1)   | 0.2(4)      |
| C(2)-C(1)-C(6)-C(5)   | 0.5(4)      |
| S(1)-C(1)-C(6)-C(5)   | -175.40(19) |
| O(2)-S(1)-N(1)-C(8)   | -170.21(18) |
| O(1)-S(1)-N(1)-C(8)   | -41.0(2)    |
| C(1)-S(1)-N(1)-C(8)   | 75.2(2)     |
| O(2)-S(1)-N(1)-C(14)  | 52.3(2)     |
| O(1)-S(1)-N(1)-C(14)  | -178.53(19) |
| C(1)-S(1)-N(1)-C(14)  | -62.3(2)    |
| C(14)-N(1)-C(8)-C(9)  | -112.4(3)   |
| S(1)-N(1)-C(8)-C(9)   | 109.9(2)    |
| N(1)-C(8)-C(9)-N(2)   | -177.6(2)   |
| N(1)-C(8)-C(9)-C(10)  | 3.1(4)      |
| C(8)-C(9)-C(10)-C(11) | 111.9(3)    |
| N(2)-C(9)-C(10)-C(11) | -67.4(3)    |

|                         |           |
|-------------------------|-----------|
| C(9)-C(10)-C(11)-O(3)   | 4.9(4)    |
| C(9)-C(10)-C(11)-O(4)   | -175.3(2) |
| O(3)-C(11)-O(4)-C(12)   | -1.5(4)   |
| C(10)-C(11)-O(4)-C(12)  | 178.7(2)  |
| C(11)-O(4)-C(12)-C(13)  | -178.5(3) |
| C(8)-C(9)-N(2)-N(3)     | 173.0(3)  |
| C(10)-C(9)-N(2)-N(3)    | -7.6(4)   |
| C(8)-N(1)-C(14)-C(15)   | 77.6(3)   |
| S(1)-N(1)-C(14)-C(15)   | -144.7(2) |
| N(1)-C(14)-C(15)-C(16)  | -113.5(3) |
| N(1)-C(14)-C(15)-C(20)  | 68.0(4)   |
| C(20)-C(15)-C(16)-C(17) | 1.2(4)    |
| C(14)-C(15)-C(16)-C(17) | -177.4(3) |
| C(15)-C(16)-C(17)-C(18) | -0.1(5)   |
| C(16)-C(17)-C(18)-C(19) | -1.4(5)   |
| C(17)-C(18)-C(19)-C(20) | 1.7(5)    |
| C(18)-C(19)-C(20)-C(15) | -0.6(5)   |
| C(16)-C(15)-C(20)-C(19) | -0.8(4)   |
| C(14)-C(15)-C(20)-C(19) | 177.7(3)  |

---

Symmetry transformations used to generate equivalent atoms:



Table 9. Hydrogen bonds for elmds\_a [A and deg.].

---

| D-H...A | d(D-H) | d(H...A) | d(D...A) | <(DHA) |
|---------|--------|----------|----------|--------|
|---------|--------|----------|----------|--------|

## Crystal Structure Report for **4a** (CCDC **2384604**)

Table 1. Crystal data and structure refinement for **4a** (CCDC **2384604**)

Identification code      2384604

Empirical formula        C<sub>18</sub> H<sub>17</sub> F<sub>3</sub> N<sub>4</sub> O<sub>2</sub> S

Formula weight          410.42

Temperature             173(2) K

Wavelength              0.71073 Å

Crystal system, space group    Triclinic, P -1

Unit cell dimensions        a = 7.1393(12) Å    alpha = 87.980(7) deg.

                                  b = 10.5980(18) Å    beta = 88.779(6) deg.

                                  c = 13.216(2) Å    gamma = 76.119(6) deg.

Volume                    970.1(3) Å<sup>3</sup>

Z, Calculated density        2, 1.405 Mg/m<sup>3</sup>

Absorption coefficient      0.216 mm<sup>-1</sup>

F(000) 424

Crystal size 0.180 x 0.160 x 0.140 mm

Theta range for data collection 1.542 to 27.907 deg.

Limiting indices  $-9 \leq h \leq 9$ ,  $-13 \leq k \leq 13$ ,  $-17 \leq l \leq 14$

Reflections collected / unique 17075 / 4609 [R(int) = 0.0288]

Completeness to theta = 25.242 100.0 %

Absorption correction Semi-empirical from equivalents

Max. and min. transmission 0.7456 and 0.6918

Refinement method Full-matrix least-squares on F<sup>2</sup>

Data / restraints / parameters 4609 / 30 / 276

Goodness-of-fit on F<sup>2</sup> 1.056

Final R indices [ $I > 2\sigma(I)$ ] R1 = 0.0384, wR2 = 0.0953

R indices (all data) R1 = 0.0568, wR2 = 0.1060

Extinction coefficient n/a

Largest diff. peak and hole 0.324 and -0.291 e.A<sup>-3</sup>

Table 2. Atomic coordinates ( $\times 10^4$ ) and equivalent isotropic displacement parameters ( $\text{Å}^2 \times 10^3$ ) for elmds\_a.

U(eq) is defined as one third of the trace of the orthogonalized Uij tensor.

---

|       | x        | y        | z        | U(eq)  |
|-------|----------|----------|----------|--------|
| N(1)  | 6582(2)  | 2212(1)  | 6487(1)  | 31(1)  |
| S(1)  | 8606(1)  | 1755(1)  | 7120(1)  | 34(1)  |
| O(1)  | 9826(2)  | 749(1)   | 6562(1)  | 51(1)  |
| O(2)  | 9196(2)  | 2924(1)  | 7304(1)  | 46(1)  |
| C(1)  | 8086(2)  | 1076(2)  | 8298(1)  | 30(1)  |
| C(2)  | 8345(2)  | -260(2)  | 8408(1)  | 34(1)  |
| C(3)  | 7995(2)  | -794(2)  | 9346(1)  | 36(1)  |
| C(4)  | 7389(2)  | -16(2)   | 10173(1) | 33(1)  |
| C(5)  | 7121(2)  | 1321(2)  | 10037(1) | 37(1)  |
| C(6)  | 7470(2)  | 1876(2)  | 9111(1)  | 35(1)  |
| C(7)  | 7039(2)  | -618(2)  | 11187(1) | 44(1)  |
| C(8)  | 5331(2)  | 3444(1)  | 6694(1)  | 29(1)  |
| N(2)  | 5716(2)  | 4545(1)  | 6169(1)  | 40(1)  |
| N(3)  | 7128(2)  | 4334(1)  | 5584(1)  | 40(1)  |
| N(4)  | 8369(2)  | 4271(2)  | 5037(1)  | 55(1)  |
| C(9)  | 3790(2)  | 3577(2)  | 7295(1)  | 34(1)  |
| C(10) | 2349(2)  | 4827(2)  | 7462(1)  | 43(1)  |
| C(11) | 2224(4)  | 5216(2)  | 8532(2)  | 69(1)  |
| F(1)  | 2080(40) | 4296(12) | 9237(12) | 98(3)  |
| F(2)  | 3883(14) | 5548(14) | 8762(12) | 77(2)  |
| F(3)  | 760(20)  | 6263(11) | 8632(11) | 100(3) |

---

|       |          |          |          |        |
|-------|----------|----------|----------|--------|
| F(1A) | 990(20)  | 6358(11) | 8713(14) | 104(4) |
| F(2A) | 1490(30) | 4327(12) | 9080(14) | 89(3)  |
| F(3A) | 3862(18) | 5270(20) | 8980(16) | 104(3) |
| C(12) | 5703(2)  | 1220(1)  | 6043(1)  | 35(1)  |
| C(13) | 5056(2)  | 1650(1)  | 4983(1)  | 31(1)  |
| C(14) | 6408(3)  | 1589(2)  | 4205(1)  | 41(1)  |
| C(15) | 5833(3)  | 2000(2)  | 3235(1)  | 53(1)  |
| C(16) | 3913(4)  | 2476(2)  | 3026(1)  | 58(1)  |
| C(17) | 2553(3)  | 2546(2)  | 3784(2)  | 53(1)  |
| C(18) | 3115(2)  | 2130(2)  | 4767(1)  | 40(1)  |

---

Table 3. Selected bond lengths [Å] and angles [deg] for elmds\_a.

---

---

Symmetry transformations used to generate equivalent atoms:

Table 4. Bond lengths [Å] and angles [deg] for elmds\_a.

---

|              |            |
|--------------|------------|
| N(1)-C(8)    | 1.4262(18) |
| N(1)-C(12)   | 1.4892(19) |
| N(1)-S(1)    | 1.6460(12) |
| S(1)-O(1)    | 1.4221(13) |
| S(1)-O(2)    | 1.4313(13) |
| S(1)-C(1)    | 1.7615(15) |
| C(1)-C(2)    | 1.386(2)   |
| C(1)-C(6)    | 1.390(2)   |
| C(2)-C(3)    | 1.388(2)   |
| C(2)-H(2)    | 0.9500     |
| C(3)-C(4)    | 1.390(2)   |
| C(3)-H(3)    | 0.9500     |
| C(4)-C(5)    | 1.389(2)   |
| C(4)-C(7)    | 1.506(2)   |
| C(5)-C(6)    | 1.384(2)   |
| C(5)-H(5)    | 0.9500     |
| C(6)-H(6)    | 0.9500     |
| C(7)-H(7A)   | 0.9800     |
| C(7)-H(7B)   | 0.9800     |
| C(7)-H(7C)   | 0.9800     |
| C(8)-C(9)    | 1.325(2)   |
| C(8)-N(2)    | 1.4162(19) |
| N(2)-N(3)    | 1.2389(19) |
| N(3)-N(4)    | 1.1223(19) |
| C(9)-C(10)   | 1.490(2)   |
| C(9)-H(9)    | 0.9500     |
| C(10)-C(11)  | 1.481(3)   |
| C(10)-H(10A) | 0.9900     |

|                 |            |
|-----------------|------------|
| C(10)-H(10B)    | 0.9900     |
| C(11)-F(3A)     | 1.337(10)  |
| C(11)-F(3)      | 1.339(8)   |
| C(11)-F(1A)     | 1.340(10)  |
| C(11)-F(1)      | 1.345(10)  |
| C(11)-F(2)      | 1.357(9)   |
| C(11)-F(2A)     | 1.362(10)  |
| C(12)-C(13)     | 1.506(2)   |
| C(12)-H(12A)    | 0.9900     |
| C(12)-H(12B)    | 0.9900     |
| C(13)-C(14)     | 1.387(2)   |
| C(13)-C(18)     | 1.389(2)   |
| C(14)-C(15)     | 1.377(3)   |
| C(14)-H(14)     | 0.9500     |
| C(15)-C(16)     | 1.373(3)   |
| C(15)-H(15)     | 0.9500     |
| C(16)-C(17)     | 1.372(3)   |
| C(16)-H(16)     | 0.9500     |
| C(17)-C(18)     | 1.392(3)   |
| C(17)-H(17)     | 0.9500     |
| C(18)-H(18)     | 0.9500     |
|                 |            |
| C(8)-N(1)-C(12) | 117.29(12) |
| C(8)-N(1)-S(1)  | 118.25(9)  |
| C(12)-N(1)-S(1) | 120.13(10) |
| O(1)-S(1)-O(2)  | 120.28(8)  |
| O(1)-S(1)-N(1)  | 106.41(7)  |
| O(2)-S(1)-N(1)  | 105.78(7)  |
| O(1)-S(1)-C(1)  | 107.75(7)  |
| O(2)-S(1)-C(1)  | 107.99(7)  |
| N(1)-S(1)-C(1)  | 108.12(7)  |

|                  |            |
|------------------|------------|
| C(2)-C(1)-C(6)   | 120.73(14) |
| C(2)-C(1)-S(1)   | 119.28(12) |
| C(6)-C(1)-S(1)   | 119.97(12) |
| C(1)-C(2)-C(3)   | 119.07(14) |
| C(1)-C(2)-H(2)   | 120.5      |
| C(3)-C(2)-H(2)   | 120.5      |
| C(2)-C(3)-C(4)   | 121.33(15) |
| C(2)-C(3)-H(3)   | 119.3      |
| C(4)-C(3)-H(3)   | 119.3      |
| C(5)-C(4)-C(3)   | 118.35(14) |
| C(5)-C(4)-C(7)   | 121.20(15) |
| C(3)-C(4)-C(7)   | 120.45(15) |
| C(6)-C(5)-C(4)   | 121.39(15) |
| C(6)-C(5)-H(5)   | 119.3      |
| C(4)-C(5)-H(5)   | 119.3      |
| C(5)-C(6)-C(1)   | 119.12(15) |
| C(5)-C(6)-H(6)   | 120.4      |
| C(1)-C(6)-H(6)   | 120.4      |
| C(4)-C(7)-H(7A)  | 109.5      |
| C(4)-C(7)-H(7B)  | 109.5      |
| H(7A)-C(7)-H(7B) | 109.5      |
| C(4)-C(7)-H(7C)  | 109.5      |
| H(7A)-C(7)-H(7C) | 109.5      |
| H(7B)-C(7)-H(7C) | 109.5      |
| C(9)-C(8)-N(2)   | 120.00(14) |
| C(9)-C(8)-N(1)   | 122.82(14) |
| N(2)-C(8)-N(1)   | 117.04(13) |
| N(3)-N(2)-C(8)   | 116.19(13) |
| N(4)-N(3)-N(2)   | 173.15(17) |
| C(8)-C(9)-C(10)  | 124.72(15) |
| C(8)-C(9)-H(9)   | 117.6      |



|                     |            |
|---------------------|------------|
| C(10)-C(9)-H(9)     | 117.6      |
| C(11)-C(10)-C(9)    | 112.93(17) |
| C(11)-C(10)-H(10A)  | 109.0      |
| C(9)-C(10)-H(10A)   | 109.0      |
| C(11)-C(10)-H(10B)  | 109.0      |
| C(9)-C(10)-H(10B)   | 109.0      |
| H(10A)-C(10)-H(10B) | 107.8      |
| F(3A)-C(11)-F(1A)   | 105.1(8)   |
| F(3)-C(11)-F(1)     | 110.2(9)   |
| F(3)-C(11)-F(2)     | 108.4(8)   |
| F(1)-C(11)-F(2)     | 104.0(8)   |
| F(3A)-C(11)-F(2A)   | 106.5(7)   |
| F(1A)-C(11)-F(2A)   | 104.4(8)   |
| F(3A)-C(11)-C(10)   | 117.6(9)   |
| F(3)-C(11)-C(10)    | 108.7(7)   |
| F(1A)-C(11)-C(10)   | 115.0(8)   |
| F(1)-C(11)-C(10)    | 116.7(8)   |
| F(2)-C(11)-C(10)    | 108.5(6)   |
| F(2A)-C(11)-C(10)   | 107.2(8)   |
| N(1)-C(12)-C(13)    | 109.50(12) |
| N(1)-C(12)-H(12A)   | 109.8      |
| C(13)-C(12)-H(12A)  | 109.8      |
| N(1)-C(12)-H(12B)   | 109.8      |
| C(13)-C(12)-H(12B)  | 109.8      |
| H(12A)-C(12)-H(12B) | 108.2      |
| C(14)-C(13)-C(18)   | 118.88(15) |
| C(14)-C(13)-C(12)   | 120.06(14) |
| C(18)-C(13)-C(12)   | 121.05(14) |
| C(15)-C(14)-C(13)   | 120.51(17) |
| C(15)-C(14)-H(14)   | 119.7      |
| C(13)-C(14)-H(14)   | 119.7      |

|                   |            |
|-------------------|------------|
| C(16)-C(15)-C(14) | 120.37(18) |
| C(16)-C(15)-H(15) | 119.8      |
| C(14)-C(15)-H(15) | 119.8      |
| C(17)-C(16)-C(15) | 120.09(17) |
| C(17)-C(16)-H(16) | 120.0      |
| C(15)-C(16)-H(16) | 120.0      |
| C(16)-C(17)-C(18) | 120.09(18) |
| C(16)-C(17)-H(17) | 120.0      |
| C(18)-C(17)-H(17) | 120.0      |
| C(13)-C(18)-C(17) | 120.07(17) |
| C(13)-C(18)-H(18) | 120.0      |
| C(17)-C(18)-H(18) | 120.0      |

---

Symmetry transformations used to generate equivalent atoms:

Table 5. Anisotropic displacement parameters ( $\text{Å}^2 \times 10^3$ ) for elmds\_a.

The anisotropic displacement factor exponent takes the form:

$$-2 \pi^2 [ h^2 a^{*2} U_{11} + \dots + 2 h k a^* b^* U_{12} ]$$

---

|       | U11    | U22   | U33    | U23    | U13    | U12    |
|-------|--------|-------|--------|--------|--------|--------|
| N(1)  | 33(1)  | 24(1) | 34(1)  | 0(1)   | -7(1)  | -5(1)  |
| S(1)  | 27(1)  | 40(1) | 34(1)  | 7(1)   | -2(1)  | -5(1)  |
| O(1)  | 40(1)  | 59(1) | 41(1)  | 9(1)   | 9(1)   | 10(1)  |
| O(2)  | 42(1)  | 56(1) | 48(1)  | 15(1)  | -13(1) | -27(1) |
| C(1)  | 22(1)  | 35(1) | 32(1)  | 3(1)   | -4(1)  | -6(1)  |
| C(2)  | 30(1)  | 33(1) | 37(1)  | -2(1)  | -1(1)  | -4(1)  |
| C(3)  | 32(1)  | 31(1) | 44(1)  | 6(1)   | -4(1)  | -7(1)  |
| C(4)  | 23(1)  | 43(1) | 33(1)  | 7(1)   | -7(1)  | -10(1) |
| C(5)  | 35(1)  | 41(1) | 34(1)  | -4(1)  | -3(1)  | -9(1)  |
| C(6)  | 36(1)  | 31(1) | 37(1)  | 0(1)   | -5(1)  | -9(1)  |
| C(7)  | 34(1)  | 60(1) | 38(1)  | 14(1)  | -6(1)  | -15(1) |
| C(8)  | 32(1)  | 24(1) | 32(1)  | 1(1)   | -6(1)  | -7(1)  |
| N(2)  | 40(1)  | 31(1) | 48(1)  | 6(1)   | 5(1)   | -9(1)  |
| N(3)  | 40(1)  | 31(1) | 48(1)  | 6(1)   | 5(1)   | -9(1)  |
| N(4)  | 44(1)  | 62(1) | 59(1)  | 14(1)  | 9(1)   | -14(1) |
| C(9)  | 38(1)  | 29(1) | 37(1)  | 1(1)   | 0(1)   | -10(1) |
| C(10) | 39(1)  | 37(1) | 50(1)  | -5(1)  | 8(1)   | -6(1)  |
| C(11) | 92(2)  | 48(1) | 61(1)  | -12(1) | 23(1)  | -8(1)  |
| F(1)  | 158(8) | 78(3) | 55(4)  | -2(2)  | 38(5)  | -24(4) |
| F(2)  | 115(4) | 61(4) | 60(4)  | -13(3) | -22(2) | -27(2) |
| F(3)  | 124(6) | 63(4) | 84(4)  | -24(4) | 34(4)  | 31(5)  |
| F(1A) | 115(5) | 73(5) | 124(8) | -55(5) | 48(4)  | -21(5) |

---

|       |        |       |       |        |        |        |
|-------|--------|-------|-------|--------|--------|--------|
| F(2A) | 117(7) | 89(4) | 52(4) | -4(3)  | 40(4)  | -10(3) |
| F(3A) | 151(5) | 87(6) | 70(5) | -17(4) | -31(4) | -16(4) |
| C(12) | 45(1)  | 24(1) | 37(1) | 0(1)   | -8(1)  | -9(1)  |
| C(13) | 39(1)  | 21(1) | 33(1) | -5(1)  | -2(1)  | -7(1)  |
| C(14) | 43(1)  | 38(1) | 44(1) | -12(1) | 4(1)   | -12(1) |
| C(15) | 79(1)  | 50(1) | 36(1) | -11(1) | 9(1)   | -28(1) |
| C(16) | 100(2) | 42(1) | 36(1) | 1(1)   | -17(1) | -21(1) |
| C(17) | 58(1)  | 41(1) | 57(1) | -4(1)  | -23(1) | -2(1)  |
| C(18) | 37(1)  | 36(1) | 44(1) | -8(1)  | -2(1)  | -4(1)  |

---

Table 6. Hydrogen coordinates ( $\times 10^4$ ) and isotropic displacement parameters ( $\text{Å}^2 \times 10^3$ ) for elmds\_a.

---

|        | x    | y     | z     | U(eq) |
|--------|------|-------|-------|-------|
| H(2)   | 8756 | -802  | 7849  | 41    |
| H(3)   | 8173 | -1709 | 9425  | 43    |
| H(5)   | 6689 | 1866  | 10593 | 44    |
| H(6)   | 7291 | 2791  | 9032  | 41    |
| H(7A)  | 5671 | -620  | 11259 | 65    |
| H(7B)  | 7395 | -111  | 11726 | 65    |
| H(7C)  | 7824 | -1513 | 11236 | 65    |
| H(9)   | 3590 | 2820  | 7643  | 41    |
| H(10A) | 2702 | 5520  | 7032  | 51    |
| H(10B) | 1065 | 4742  | 7249  | 51    |
| H(12A) | 4585 | 1112  | 6464  | 42    |
| H(12B) | 6659 | 372   | 6032  | 42    |
| H(14)  | 7740 | 1262  | 4342  | 49    |
| H(15)  | 6771 | 1953  | 2708  | 63    |
| H(16)  | 3526 | 2759  | 2356  | 70    |
| H(17)  | 1225 | 2878  | 3638  | 64    |
| H(18)  | 2170 | 2176  | 5290  | 47    |

---

Table 7. Selected torsion angles [deg] for elmds\_a.

---

---

Symmetry transformations used to generate equivalent atoms:

Table 8. Torsion angles [deg] for elmds\_a.

---

|                      |             |
|----------------------|-------------|
| C(8)-N(1)-S(1)-O(1)  | -161.54(11) |
| C(12)-N(1)-S(1)-O(1) | 42.48(13)   |
| C(8)-N(1)-S(1)-O(2)  | -32.53(13)  |
| C(12)-N(1)-S(1)-O(2) | 171.49(11)  |
| C(8)-N(1)-S(1)-C(1)  | 82.95(12)   |
| C(12)-N(1)-S(1)-C(1) | -73.04(13)  |
| O(1)-S(1)-C(1)-C(2)  | -19.22(14)  |
| O(2)-S(1)-C(1)-C(2)  | -150.57(12) |
| N(1)-S(1)-C(1)-C(2)  | 95.41(12)   |
| O(1)-S(1)-C(1)-C(6)  | 159.16(12)  |
| O(2)-S(1)-C(1)-C(6)  | 27.82(14)   |
| N(1)-S(1)-C(1)-C(6)  | -86.20(13)  |
| C(6)-C(1)-C(2)-C(3)  | -0.5(2)     |
| S(1)-C(1)-C(2)-C(3)  | 177.89(11)  |
| C(1)-C(2)-C(3)-C(4)  | 0.1(2)      |
| C(2)-C(3)-C(4)-C(5)  | 0.6(2)      |
| C(2)-C(3)-C(4)-C(7)  | -179.29(14) |
| C(3)-C(4)-C(5)-C(6)  | -0.9(2)     |
| C(7)-C(4)-C(5)-C(6)  | 178.94(14)  |
| C(4)-C(5)-C(6)-C(1)  | 0.6(2)      |
| C(2)-C(1)-C(6)-C(5)  | 0.2(2)      |
| S(1)-C(1)-C(6)-C(5)  | -178.20(11) |
| C(12)-N(1)-C(8)-C(9) | 57.35(19)   |
| S(1)-N(1)-C(8)-C(9)  | -99.32(15)  |
| C(12)-N(1)-C(8)-N(2) | -118.21(14) |
| S(1)-N(1)-C(8)-N(2)  | 85.12(15)   |
| C(9)-C(8)-N(2)-N(3)  | -176.57(14) |
| N(1)-C(8)-N(2)-N(3)  | -0.9(2)     |

|                         |             |
|-------------------------|-------------|
| N(2)-C(8)-C(9)-C(10)    | 1.0(2)      |
| N(1)-C(8)-C(9)-C(10)    | -174.40(14) |
| C(8)-C(9)-C(10)-C(11)   | -118.8(2)   |
| C(9)-C(10)-C(11)-F(3A)  | 53.2(12)    |
| C(9)-C(10)-C(11)-F(3)   | -173.2(8)   |
| C(9)-C(10)-C(11)-F(1A)  | 177.8(8)    |
| C(9)-C(10)-C(11)-F(1)   | -47.8(13)   |
| C(9)-C(10)-C(11)-F(2)   | 69.2(7)     |
| C(9)-C(10)-C(11)-F(2A)  | -66.6(9)    |
| C(8)-N(1)-C(12)-C(13)   | 68.02(17)   |
| S(1)-N(1)-C(12)-C(13)   | -135.77(12) |
| N(1)-C(12)-C(13)-C(14)  | 73.66(17)   |
| N(1)-C(12)-C(13)-C(18)  | -105.25(16) |
| C(18)-C(13)-C(14)-C(15) | 0.0(2)      |
| C(12)-C(13)-C(14)-C(15) | -178.92(15) |
| C(13)-C(14)-C(15)-C(16) | 0.1(3)      |
| C(14)-C(15)-C(16)-C(17) | -0.1(3)     |
| C(15)-C(16)-C(17)-C(18) | -0.1(3)     |
| C(14)-C(13)-C(18)-C(17) | -0.2(2)     |
| C(12)-C(13)-C(18)-C(17) | 178.73(15)  |
| C(16)-C(17)-C(18)-C(13) | 0.3(3)      |

---

Symmetry transformations used to generate equivalent atoms:



Table 9. Hydrogen bonds for elmds\_a [A and deg.].

---

| D-H...A | d(D-H) | d(H...A) | d(D...A) | <(DHA) |
|---------|--------|----------|----------|--------|
|---------|--------|----------|----------|--------|
